# Supplementary material for: Pooled CRISPR screening in pancreatic cancer cells implicates co-repressor complexes as a cause of multiple drug resistance via regulation of epithelial-to-mesenchymal transition
Source: Springer Nature journal article supplement (doi:10.1186/s12885-021-08388-1), 2021-05-29
Supplement: MOESM1 [file 12885_2021_8388_MOESM1_ESM.xlsx]

## Sheet: Sheet1
Supplemental Tables for Ramaker et al.
Pooled CRISPR screening in pancreatic cancer cells implicates co-repressor complexes as a cause of multiple drug resistance via regulation of epithelial-to-mesenchymal transition
Author list:
Ryne C. Ramaker*1,2
Andrew A. Hardigan*1,2
Emily R. Gordon*2
Carter A. Wright2,3
Richard M. Myers2
Sara J. Cooper2
List of Tables:
Supplemental Table S1 Primer Sequences for sgRNA Library Construction
Supplemental Table S2 sgRNA sequences for CRISPRact of individual genes and controls
Supplemental Table S3A. Activation (SAM) Screen results. L2FC Sum for individual drug-cell line combinations and combined
Supplemental Table S3B. Knockout (Gecko) Screen results. L2FC Sum for individual drug-cell line combinations
Supplemental Table S4A. Top 10 hits for each drug in each cell line for knockout (GecKO) Screen
Supplemental Table S4B. Top 10 hits for each drug in each cell line for Activation (SAM) Screen
Supplemental Table S5. Results of pathway analysis and Survival p-values used to make Figure 2A

## Sheet: TableS1
Supplemental Table S1 Primer Sequences for sgRNA Library Construction
Gecko_v1_PCR1_FWD	AATGGACTATCATATGCTTACCGTAACTTGAAAGTATTTCG
Becko_v1_PCR1_REV	CTTTAGTTTGTATGTCTGTTGCTATTATGTCTACTATTCTTTCC
Gecko_PCR2_FWD_1	AATGATACGGCGACCACCGAGATCTACACTCTTTCCCTACACGACGTCTTCCGATCTtAAGTAGAGtcttgtggaaaggacgaaacaccg
Gecko_PCR2_FWD_2	AATGATACGGCGACCACCGAGATCTACACTCTTTCCCTACACGACGTCTTCCGATCTatACACGATCtcttgtggaaaggacgaaacaccg
Gecko_PCR2_FWD_3	AATGATACGGCGACCACCGAGATCTACACTCTTTCCCTACACGACGTCTTCCGATCTgatCGCGCGGTtcttgtggaaaggacgaaacaccg
Gecko_PCR2_FWD_4	AATGATACGGCGACCACCGAGATCTACACTCTTTCCCTACACGACGTCTTCCGATCTcgatCATGATCGtcttgtggaaaggacgaaacaccg
Gecko_PCR2_FWD_5	AATGATACGGCGACCACCGAGATCTACACTCTTTCCCTACACGACGTCTTCCGATCTtcgatCGTTACCAtcttgtggaaaggacgaaacaccg
Gecko_PCR2_FWD_6	AATGATACGGCGACCACCGAGATCTACACTCTTTCCCTACACGACGTCTTCCGATCTatcgatTCCTTGGTtcttgtggaaaggacgaaacaccg
Gecko_PCR2_FWD_7	AATGATACGGCGACCACCGAGATCTACACTCTTTCCCTACACGACGTCTTCCGATCTgatcgatAACGCATTtcttgtggaaaggacgaaacaccg
Gecko_PCR2_FWD_8	AATGATACGGCGACCACCGAGATCTACACTCTTTCCCTACACGACGTCTTCCGATCTcgatcgatACAGGTATtcttgtggaaaggacgaaacaccg
Gecko_PCR2_FWD_9	AATGATACGGCGACCACCGAGATCTACACTCTTTCCCTACACGACGTCTTCCGATCTacgatcgatAGGTAAGGtcttgtggaaaggacgaaacaccg
Gecko_PCR2_FWD_10	AATGATACGGCGACCACCGAGATCTACACTCTTTCCCTACACGACGTCTTCCGATCTtAACAATGGtcttgtggaaaggacgaaacaccg
Gecko_PCR2_REV_1	CAAGCAGAAGACGGCATACGAGATAAGTAGAGGTGACTGGAGTTCAGACGTGTGCTCTTCCGATCTtTCTACTATTCTTTCCCCTGCACTGT
Gecko_PCR2_REV_2	CAAGCAGAAGACGGCATACGAGATAAGTAGAGGTGACTGGAGTTCAGACGTGTGCTCTTCCGATCTatTCTACTATTCTTTCCCCTGCACTGT
Gecko_PCR2_REV_3	CAAGCAGAAGACGGCATACGAGATAAGTAGAGGTGACTGGAGTTCAGACGTGTGCTCTTCCGATCTgatTCTACTATTCTTTCCCCTGCACTGT
Gecko_PCR2_REV_4	CAAGCAGAAGACGGCATACGAGATAAGTAGAGGTGACTGGAGTTCAGACGTGTGCTCTTCCGATCTcgatTCTACTATTCTTTCCCCTGCACTGT
Gecko_PCR2_REV_5	CAAGCAGAAGACGGCATACGAGATAAGTAGAGGTGACTGGAGTTCAGACGTGTGCTCTTCCGATCTtcgatTCTACTATTCTTTCCCCTGCACTGT
Gecko_PCR2_REV_6	CAAGCAGAAGACGGCATACGAGATAAGTAGAGGTGACTGGAGTTCAGACGTGTGCTCTTCCGATCTatcgatTCTACTATTCTTTCCCCTGCACTGT
Gecko_PCR2_REV_7	CAAGCAGAAGACGGCATACGAGATAAGTAGAGGTGACTGGAGTTCAGACGTGTGCTCTTCCGATCTgatcgatTCTACTATTCTTTCCCCTGCACTGT
Gecko_PCR2_REV_8	CAAGCAGAAGACGGCATACGAGATAAGTAGAGGTGACTGGAGTTCAGACGTGTGCTCTTCCGATCTcgatcgatTCTACTATTCTTTCCCCTGCACTGT
Gecko_PCR2_REV_9	CAAGCAGAAGACGGCATACGAGATAAGTAGAGGTGACTGGAGTTCAGACGTGTGCTCTTCCGATCTcgatcgatTCTACTATTCTTTCCCCTGCACTGT
Gecko_PCR2_REV_10	CAAGCAGAAGACGGCATACGAGATAAGTAGAGGTGACTGGAGTTCAGACGTGTGCTCTTCCGATCTacgatcgatTCTACTATTCTTTCCCCTGCACTGT
Gecko_PCR2_REV_11	CAAGCAGAAGACGGCATACGAGATAAGTAGAGGTGACTGGAGTTCAGACGTGTGCTCTTCCGATCTatTCTACTATTCTTTCCCCTGCACTGT
Gecko_PCR2_REV_12	CAAGCAGAAGACGGCATACGAGATAAGTAGAGGTGACTGGAGTTCAGACGTGTGCTCTTCCGATCTgatTCTACTATTCTTTCCCCTGCACTGT
SAM_PCR1_FWD	GAGGGCCTATTTCCCATGATTCCTTCATAT
SAM_PCR1_REV	cctagaaggtccattagctgcaaagattc
SAM_PCR2_FWD_1	AATGATACGGCGACCACCGAGATCTACACTCTTTCCCTACACGACGTCTTCCGATCTtAAGTAGAGGCTTTATATATCTTGTGGAAAGGACGAAACACC
SAM_PCR2_FWD_2	AATGATACGGCGACCACCGAGATCTACACTCTTTCCCTACACGACGTCTTCCGATCTatACACGATCGCTTTATATATCTTGTGGAAAGGACGAAACACC
SAM_PCR2_FWD_3	AATGATACGGCGACCACCGAGATCTACACTCTTTCCCTACACGACGTCTTCCGATCTgatCGCGCGGTGCTTTATATATCTTGTGGAAAGGACGAAACACC
SAM_PCR2_FWD_4	AATGATACGGCGACCACCGAGATCTACACTCTTTCCCTACACGACGTCTTCCGATCTcgatCATGATCGGCTTTATATATCTTGTGGAAAGGACGAAACACC
SAM_PCR2_FWD_5	AATGATACGGCGACCACCGAGATCTACACTCTTTCCCTACACGACGTCTTCCGATCTtcgatCGTTACCAGCTTTATATATCTTGTGGAAAGGACGAAACACC
SAM_PCR2_FWD_6	AATGATACGGCGACCACCGAGATCTACACTCTTTCCCTACACGACGTCTTCCGATCTatcgatTCCTTGGTGCTTTATATATCTTGTGGAAAGGACGAAACACC
SAM_PCR2_FWD_7	AATGATACGGCGACCACCGAGATCTACACTCTTTCCCTACACGACGTCTTCCGATCTgatcgatAACGCATTGCTTTATATATCTTGTGGAAAGGACGAAACACC
SAM_PCR2_FWD_8	AATGATACGGCGACCACCGAGATCTACACTCTTTCCCTACACGACGTCTTCCGATCTcgatcgatACAGGTATGCTTTATATATCTTGTGGAAAGGACGAAACACC
SAM_PCR2_FWD_9	AATGATACGGCGACCACCGAGATCTACACTCTTTCCCTACACGACGTCTTCCGATCTacgatcgatAGGTAAGGGCTTTATATATCTTGTGGAAAGGACGAAACACC
SAM_PCR2_FWD_10	AATGATACGGCGACCACCGAGATCTACACTCTTTCCCTACACGACGTCTTCCGATCTtAACAATGGGCTTTATATATCTTGTGGAAAGGACGAAACACC
SAM_PCR2_REV_ALL	CAAGCAGAAGACGGCATACGAGATAACAATGGGTGACTGGAGTTCAGACGTGTGCTCTTCCGATCTGCCAAGTTGATAACGGAACTAGCCTT

## Sheet: TableS2
Supplemental Table S2 sgRNA sequences for CRISPRact of individual genes and controls
Guide Name	Guide Sequence	System tested
ABCG2_B	CACCACACGTGTGCGCTTTCAGCC	SAM
HDAC2_B	CACCGGTGAACAACCTGCGCAAGG	SAM
PLEC_B	CACCCGCGTCTGGGCCCCTCCCGG	SAM
ABCG2_A	CACCGCAGGGCGCTTATCGCGGCC	SAM
PLEC_A	CACCACGGGAAAGGGCGTGCGTGC	SAM
TBL1XR1	CACCGCGAGCGGGGAGAGGAATTG	SAM
HDAC2_A	CACCCCATACACAGTGTTAAAATG	SAM
SP3	CACCGCTGAGCAGCGGTGGCCTCC	SAM
MAST4	CACCGGCCATGAGGGCCTCAGGTA	SAM
NTC1	ACGGAGGCTAAGCGTCGCAA	Both
NTC2	CGCTTCCGCGGCCCGTTCAA	Both
HDAC1_A	CACCGCGGGCCCGGAACTCGGCAGG	SAM
BRMS1_B	CACCGCCGACATTCGCGCAGGCCTT	SAM
CHD4_A	CACCGGGAGGGTGGCGGTAGTGGAA	SAM
GATA2_A	CACCGGGACTCCGGGACTGACCCGC	SAM
SAP18_A	CACCGAGCGTCCGTCGCCTAGCAGT	SAM
MTA2_A	CACCGGGGCTTAACTCTGTCCTCGC	SAM
RBBP7_A	CACCGAGGGCTCGCCCGGCGCTCCC	SAM
SAP30_B	CACCGGCGGGGTCAGGGCGGAGCTC	SAM
SIN3A_A	CACCGACTCAGCTTCGTTCCAATAC	SAM
SIN3B_B	CACCGATGATTTATATAGCAGGGGT	SAM
SMARCA4_A	CACCGCAAGACGCGAGGCGTGCAGA	SAM
ARID4A_A	CACCGGGATTGGTGAGAAAAACAGC	SAM
NTC3	ATCGTTTCCGCTTAACGGCG	Both

## Sheet: TableS3A
Supplemental Table S3A. Activation (SAM) Screen results. L2FC Sum for individual drug-cell line combinations and combined
P1= Panc1,B3=BxPC3
For each gene in each screen we calculated a L2FC sum, a p-value and FDR
Gene_ID		Combined_L2FC_Sum	Combined_P	Combined_FDR	P1_Gemcitabine_L2FC_Sum	P1_Gemcitabine_P	P1_Gemcitabine_FDR	P1_Irinotecan_L2FC_Sum	P1_Irinotecan_P	P1_Irinotecan_FDR	P1_Oxaliplatin_L2FC_Sum	P1_Oxaliplatin_P	P1_Oxaliplatin_FDR	P1_5FU_L2FC_Sum	P1_5FU_P	P1_5FU_FDR	B3_Gemcitabine_L2FC_Sum	B3_Gemcitabine_P	B3_Gemcitabine_FDR	B3_Irinotecan_L2FC_Sum	B3_Irinotecan_P	B3_Irinotecan_FDR	B3_Oxaliplatin_L2FC_Sum	B3_Oxaliplatin_P	B3_Oxaliplatin_FDR	B3_5FU_L2FC_Sum	B3_5FU_P	B3_5FU_FDR
NM_000014	A2M	-0.185547	0.130953	0.350599	1.30817	0.0216862	0.129814	-0.093118	0.0506484	0.163224	1.56524	0.00475934	0.0483397	0.310028	0.171654	0.394651	-0.0878052	0.5948	0.890741	-0.170216	0.627109	0.916173	-0.147466	0.66974	0.911611	-0.336701	0.74482	0.948291
NM_000015	NAT2	-0.615085	0.226631	0.380142	0.404446	0.218216	0.461667	-2.0444	0.231691	0.428194	-1.1617	0.827892	0.944957	0.341308	0.160581	0.379965	0.163152	0.252577	0.693516	0.306888	0.131874	0.603273	0.520696	0.0211785	0.285921	-0.246447	0.665934	0.921368
NM_000017	ACADS	-0.0986667	0.11473	0.350599	1.3497	0.018844	0.119126	-0.592404	0.0812633	0.220288	1.17915	0.0163407	0.102187	-0.34534	0.479544	0.69396	-0.165334	0.692739	0.929146	-0.499326	0.883811	0.985339	0.109755	0.320029	0.727897	0.160238	0.245798	0.684281
NM_000018	ACADVL	-0.32636	0.159638	0.350599	-0.262644	0.5179	0.729897	-2.12769	0.242713	0.441365	0.439542	0.122596	0.342689	0.645351	0.0763789	0.247028	-0.0962762	0.606091	0.895641	0.120764	0.295918	0.762534	0.128628	0.295467	0.708676	0.112005	0.291028	0.722307
NM_000019	ACAT1	-0.725334	0.254139	0.399479	-0.169672	0.474957	0.697795	-2.20277	0.252692	0.452401	-0.83816	0.710191	0.885134	0.309267	0.171943	0.394882	0.0422042	0.412285	0.801898	0.377173	0.0903713	0.537219	0.584798	0.0114654	0.234084	-0.0326073	0.441387	0.82093
NM_000020	ACVRL1	0.0242162	0.0938776	0.350599	-2.42799	0.960279	0.984456	6.74631	2.28e-06	0.000329514	-0.256758	0.417704	0.681422	0.193728	0.217459	0.453126	-0.0334662	0.519405	0.855409	-0.148508	0.603528	0.909011	-0.126252	0.64369	0.90153	0.405091	0.0824752	0.46842
NM_000021	PSEN1	-0.110484	0.116868	0.350599	0.328252	0.248307	0.492817	-0.866471	0.102643	0.256236	0.805886	0.0491806	0.201026	0.4646	0.121268	0.325522	-0.0943108	0.603532	0.894589	0.386422	0.0857245	0.525854	-0.17995	0.707301	0.924955	-0.554098	0.881932	0.985446
NM_000022	ADA	-0.603184	0.223688	0.378539	1.62204	0.00696036	0.0676065	-6.24998	0.794648	0.899884	1.0938	0.0214337	0.120545	1.1214	0.0174286	0.102455	-0.20474	0.738059	0.94554	0.558938	0.0281259	0.363644	0.0265911	0.434974	0.801298	0.36622	0.100914	0.504252
NM_000024	ADRB2	-0.760417	0.263042	0.405599	0.651405	0.13379	0.355528	-3.1398	0.390157	0.590789	0.0176685	0.280551	0.55112	1.14278	0.0162063	0.0987463	-0.306637	0.833126	0.973893	-0.624534	0.931817	0.994194	-0.850459	0.99007	0.999918	-1.26004	0.994743	0.999781
NM_000025	ADRB3	-0.555866	0.212138	0.37155	1.52588	0.00989922	0.0815679	-8.05341	0.909873	0.9654	2.79807	8.76e-05	0.0041537	1.50599	0.00398983	0.0427437	0.132681	0.289715	0.721308	-0.444572	0.854989	0.980454	-0.0630822	0.560602	0.869413	-0.226383	0.646335	0.914389
NM_000026	ADSL	0.249276	0.0624504	0.350599	1.47301	0.0121591	0.0918916	4.96138	6.84e-06	0.000442243	-1.61177	0.924716	0.983563	0.401885	0.140377	0.353175	0.032347	0.42575	0.807041	0.39132	0.0833178	0.522165	0.315855	0.106338	0.502191	0.25758	0.167098	0.602841
NM_000029		-1.48696	0.451098	0.542279	-0.788302	0.726719	0.867309	-3.13714	0.389751	0.590397	-1.85951	0.953816	0.991199	-0.162901	0.386186	0.61937	-0.779834	0.987834	0.999859	-0.573901	0.914972	0.990946	-0.64478	0.968996	0.998061	-0.649231	0.918799	0.993747
NM_000030	AGXT	-0.0273441	0.102254	0.350599	0.55627	0.16382	0.397005	0.0393072	0.0442398	0.150171	-0.119786	0.347182	0.617796	-0.585168	0.596655	0.77891	0.601181	0.0102652	0.233054	0.233476	0.187501	0.668762	0.412419	0.0531699	0.402764	0.219955	0.195128	0.635733
NM_000031	ALAD	-2.03248	0.577672	0.636383	-0.368509	0.565166	0.762805	-7.17003	0.86387	0.94186	-0.382095	0.48432	0.733775	-0.209281	0.40984	0.638953	0.27662	0.136984	0.571822	0.365839	0.0963871	0.546186	0.327867	0.0981242	0.489898	0.215234	0.198865	0.639134
NM_000033	ABCD1	-7.73083	0.995036	0.995262	-9.91219	0.999802	0.999941	-12.1457	0.983925	0.995307	-3.08546	0.996252	0.99968	-5.77994	0.998419	0.999438	0.436449	0.044734	0.384309	1.05968	0.000365323	0.0716305	0.883273	0.000381377	0.0629523	0.467734	0.058723	0.416285
NM_000034		0.0510812	0.0896606	0.350599	-0.465935	0.606775	0.791465	3.60693	0.000152858	0.00353332	-1.0015	0.774943	0.920845	-1.8846	0.921875	0.965096	-0.105076	0.618085	0.901184	-0.0165045	0.450757	0.845279	0.0476237	0.405295	0.784994	0.278281	0.152616	0.582025
NM_000035	ALDOB	-0.00385259	0.0983662	0.350599	0.364153	0.233541	0.47759	2.7779	0.000850984	0.0111735	1.95516	0.00131601	0.0219854	0.153297	0.234528	0.473791	0.223226	0.185887	0.628947	-0.109506	0.559725	0.894241	0.180638	0.23255	0.660747	-0.309769	0.722339	0.93971
NM_000036	AMPD1	-2.39827	0.652209	0.695829	-1.99865	0.93672	0.972898	-9.213	0.946612	0.98331	3.86372	6.26e-06	0.000718232	-2.24514	0.948597	0.976174	-0.502376	0.938875	0.996872	0.184197	0.231645	0.713614	-0.47202	0.922538	0.990031	0.0447121	0.359071	0.774098
NM_000039	APOA1	-0.354543	0.165774	0.351115	0.786243	0.0982375	0.303751	-2.20715	0.253251	0.452779	0.534571	0.0982589	0.301419	-0.531842	0.571882	0.761013	0.46488	0.0356672	0.358427	0.207919	0.209822	0.693488	0.205717	0.204739	0.635679	-0.177094	0.596699	0.893763
NM_000040	APOC3	NA	NA	NA	2.05096	0.00113729	0.023033	NA	NA	NA	0.908035	0.0371174	0.169192	3.59659	2.11e-06	0.000579124	-0.185468	0.716286	0.93782	-0.0974977	0.545903	0.887093	0.371017	0.0723994	0.443701	0.0890872	0.31369	0.741782
NM_000041	APOE	0.154382	0.0746965	0.350599	1.37124	0.0175155	0.11456	-0.760185	0.0939596	0.241945	-1.04076	0.788912	0.926872	1.51037	0.00389906	0.0421101	-0.0661258	0.565059	0.877607	-0.0430062	0.482032	0.859051	0.370394	0.0727085	0.444092	0.356266	0.105997	0.513636
NM_000042	APOH	-0.427967	0.182066	0.356223	1.08827	0.0436877	0.193472	-1.76745	0.196552	0.387182	-0.322401	0.452375	0.710581	0.0866547	0.263842	0.503795	-0.429728	0.910149	0.993534	-0.338214	0.783122	0.963454	-0.423715	0.90126	0.984202	-0.52021	0.865855	0.98367
NM_000044	AR	0.114184	0.0802819	0.350599	-0.0267162	0.407621	0.644379	1.84765	0.00407469	0.0311135	-0.456016	0.524216	0.765268	0.781967	0.0519101	0.197184	0.0499159	0.401376	0.797608	0.170776	0.244724	0.724932	0.19589	0.215327	0.643448	0.0401543	0.363888	0.776729
NM_000045	ARG1	-0.358339	0.166609	0.351141	2.59433	9.88e-05	0.00667007	-0.477021	0.0735246	0.206895	1.41375	0.00776678	0.0653706	1.51652	0.00379562	0.0412966	-0.305858	0.832485	0.973893	-0.243606	0.701643	0.940671	-0.152184	0.675484	0.913443	-0.73171	0.942357	0.997236
NM_000046	ARSB	0.044633	0.0906587	0.350599	0.517524	0.176883	0.413349	2.56627	0.00127305	0.0145611	1.40795	0.00790234	0.0658159	2.29523	0.00012455	0.00533483	-0.00445959	0.477953	0.837106	-0.167535	0.624273	0.916169	0.0649851	0.380807	0.769572	0.285542	0.147862	0.578101
NM_000047	ARSL	-1.2113	0.38097	0.490979	-0.11363	0.44849	0.677577	-2.80031	0.338434	0.542626	-0.750859	0.671055	0.862216	-1.1804	0.807905	0.905924	0.284626	0.130551	0.561749	0.134455	0.281415	0.75351	0.264044	0.147525	0.570302	0.203202	0.208579	0.651869
NM_000048	ASL	-0.30217	0.154456	0.350599	1.17073	0.0340702	0.168445	-0.537986	0.0775605	0.213894	-0.17907	0.377419	0.646747	-0.185168	0.397425	0.629348	-0.383894	0.885837	0.987493	-0.346731	0.789628	0.965537	0.104437	0.327157	0.734349	-0.582491	0.894046	0.98746
NM_000049	ASPA	-0.0141152	0.100072	0.350599	0.0388309	0.37719	0.617891	-0.0368609	0.047719	0.157323	1.25017	0.0130121	0.089561	0.763602	0.0548212	0.203713	-0.441176	0.915498	0.994502	0.122402	0.294141	0.761487	0.214039	0.195737	0.626616	0.0482729	0.355233	0.770656
NM_000050	ASS1	-1.02014	0.33098	0.454612	-0.541448	0.637767	0.812328	-1.82394	0.203397	0.395522	-1.63173	0.927623	0.984175	-0.0834534	0.345488	0.58302	0.556831	0.0159116	0.2747	0.563066	0.0272708	0.359844	0.280481	0.133644	0.546958	0.59222	0.0275459	0.310837
NM_000051	ATM	NA	NA	NA	0.342389	0.242521	0.487394	NA	NA	NA	-0.696845	0.645777	0.847585	0.496531	0.112211	0.311355	0.118744	0.307749	0.733414	-0.0204311	0.455442	0.848011	0.182822	0.230042	0.658434	0.277684	0.153001	0.582609
NM_000052	ATP7A	0.154961	0.0746193	0.350599	1.13279	0.0381548	0.180073	0.18489	0.0377513	0.135757	0.744805	0.057744	0.219555	0.314622	0.169923	0.392472	-0.188414	0.719582	0.939059	0.347976	0.106357	0.563717	0.207666	0.202581	0.632934	0.252614	0.170655	0.608658
NM_000053	ATP7B	NA	NA	NA	-1.57244	0.895185	0.953525	NA	NA	NA	0.887187	0.039372	0.175073	-0.429768	0.522098	0.726302	0.603941	0.00999621	0.232015	0.401716	0.0784722	0.513439	0.715164	0.00284226	0.137812	0.353978	0.107189	0.515624
NM_000055	BCHE	0.116337	0.0799625	0.350599	1.00132	0.0562399	0.223766	-0.268433	0.0604085	0.182589	-0.389526	0.48831	0.737276	0.543467	0.100117	0.291669	0.201191	0.209103	0.652954	-0.356567	0.796896	0.96684	0.115997	0.311657	0.720199	0.504728	0.0475043	0.382875
NM_000056	BCKDHB	-2.13776	0.599869	0.653795	-1.37717	0.86712	0.94066	-3.78189	0.488545	0.677112	-2.64895	0.990888	0.99968	-0.743038	0.665103	0.823864	-0.2334	0.768144	0.955098	-0.00731606	0.440124	0.840601	0.0882032	0.348887	0.749089	-0.291412	0.706455	0.933693
NM_000057	BLM	-0.491955	0.19687	0.36449	0.37015	0.231218	0.475586	-1.43411	0.157649	0.337015	-0.682332	0.638874	0.842818	-0.22153	0.416176	0.644534	-0.216907	0.751329	0.950272	-0.171067	0.628003	0.916602	0.245451	0.164265	0.590529	-0.323549	0.734121	0.944176
NM_000059	BRCA2	-0.887406	0.296008	0.429835	0.426618	0.20978	0.4524	-3.9328	0.511159	0.697473	0.186448	0.207868	0.465614	-0.229885	0.420436	0.647925	0.242808	0.166945	0.608358	-0.113033	0.563658	0.895555	-0.178489	0.705609	0.924019	0.223225	0.192526	0.633054
NM_000060		-1.76842	0.518604	0.591806	-1.46493	0.880589	0.948044	-5.36169	0.703789	0.839559	0.0214838	0.278809	0.549138	-0.268554	0.440302	0.664519	0.059966	0.387126	0.787845	-0.231691	0.690118	0.936529	0.0648272	0.381056	0.769801	-0.0752683	0.488077	0.847484
NM_000061	BTK	0.220035	0.0660795	0.350599	-0.166208	0.473271	0.696254	4.62697	1.6e-05	0.000813156	0.384358	0.138626	0.368319	1.4378	0.00525645	0.0504691	0.467387	0.0349305	0.356534	-0.136329	0.590154	0.904424	0.441258	0.0422124	0.369553	0.107824	0.295171	0.726321
NM_000062	SERPING1	-1.55106	0.466852	0.553733	0.193078	0.306422	0.553836	-7.18668	0.86486	0.942483	-0.157702	0.366507	0.63668	0.947065	0.0309835	0.144375	0.505855	0.0249303	0.318509	0.236895	0.184653	0.666903	0.0246302	0.437656	0.803025	0.32417	0.123536	0.54542
NM_000064	C3	0.148512	0.0755437	0.350599	0.307884	0.256846	0.502547	0.274744	0.0342356	0.127256	-0.225868	0.401583	0.667328	0.237289	0.199867	0.431654	0.119095	0.307323	0.733414	0.498006	0.0431362	0.417663	-0.124582	0.641707	0.900773	0.595557	0.0269277	0.30744
NM_000065	C6	-0.0514298	0.106323	0.350599	0.42092	0.211939	0.454623	-1.18818	0.132117	0.301054	1.29443	0.0113644	0.0830132	-0.732882	0.660835	0.821056	0.269804	0.142719	0.57938	0.26865	0.159124	0.638207	0.305143	0.11421	0.51625	0.0082355	0.397639	0.797546
NM_000067	CA2	NA	NA	NA	-1.74406	0.914998	0.963226	NA	NA	NA	0.100681	0.243262	0.509279	NA	NA	NA	-0.868046	0.992963	0.999859	-0.861701	0.977003	0.999863	-0.991009	0.995407	0.999918	-1.07734	0.987701	0.999781
NM_000069	CACNA1S	-0.03205	0.103035	0.350599	1.52104	0.0100737	0.0823881	-4.79244	0.632693	0.789318	1.24311	0.0133291	0.0905846	2.15562	0.000219546	0.00708186	-0.117878	0.634611	0.90756	0.318169	0.124489	0.593001	-0.109323	0.622315	0.893963	-0.219167	0.639382	0.912044
NM_000071	CBS	-0.285591	0.15099	0.350599	-0.424752	0.589331	0.780187	0.905872	0.0159223	0.0775002	-0.856128	0.717826	0.889257	-0.767355	0.674674	0.830256	0.794775	0.00125856	0.104039	0.0908597	0.328187	0.782786	0.540985	0.0174811	0.266182	0.71945	0.0115338	0.21804
NM_000072	CD36	-0.238193	0.141368	0.350599	-0.167831	0.474048	0.697167	-4.34038	0.570908	0.744253	0.929279	0.0350277	0.162893	2.62616	2.11e-05	0.00153459	-0.326045	0.847839	0.97707	0.808786	0.00376564	0.171169	0.450326	0.0390851	0.357999	-0.230631	0.650691	0.916452
NM_000073	CD3G	NA	NA	NA	-0.0254251	0.407005	0.643894	NA	NA	NA	-0.445257	0.518472	0.761269	-0.282708	0.447585	0.670192	0.0825635	0.355919	0.770103	-0.136825	0.590772	0.904803	0.194411	0.216915	0.645473	-0.494049	0.851975	0.980766
NM_000074	CD40LG	-0.420896	0.180461	0.355855	-0.762077	0.718073	0.861464	-0.253977	0.0595621	0.180743	-0.627881	0.612112	0.825703	-0.0396475	0.323459	0.562678	-0.355484	0.868301	0.982377	-0.0768325	0.521906	0.878359	-0.317503	0.836355	0.966518	-0.116284	0.532978	0.867411
NM_000075	CDK4	-2.26832	0.626506	0.674727	-0.387958	0.573467	0.769288	-5.57444	0.72803	0.856039	-2.19104	0.976506	0.997298	-0.919853	0.730418	0.861677	0.0598082	0.387397	0.787845	0.389318	0.0842752	0.523611	-0.0181216	0.49869	0.839346	-0.0117019	0.419002	0.808986
NM_000077	CDKN2A	-0.379967	0.171294	0.352037	1.09042	0.0433829	0.193029	-4.1952	0.549978	0.728089	0.301016	0.165547	0.409007	1.2839	0.00970859	0.0734005	0.490916	0.0285454	0.334531	0.110024	0.307223	0.770294	0.326352	0.0990937	0.491008	0.367518	0.100226	0.502765
NM_000078	CETP	-2.03231	0.57763	0.636368	1.3924	0.0163403	0.110054	-11.8625	0.981561	0.994523	1.52353	0.00542256	0.0524128	0.817341	0.0467127	0.185476	0.0435479	0.41032	0.801176	-0.243533	0.701557	0.940671	-0.262254	0.790743	0.952431	0.0160312	0.389505	0.792811
NM_000079	CHRNA1	-0.343597	0.163389	0.350923	-0.137255	0.459632	0.685876	-3.28236	0.411986	0.610437	0.165976	0.216104	0.476695	1.87925	0.000808522	0.0164445	0.0247316	0.436485	0.815274	-0.145581	0.600294	0.908317	-0.148215	0.670673	0.911966	0.189244	0.22043	0.663722
NM_000080	CHRNE	-0.238487	0.141435	0.350599	-0.633853	0.673164	0.834201	-0.224545	0.0578281	0.177287	0.407626	0.13152	0.357525	-0.503176	0.558129	0.751757	0.132538	0.289908	0.721552	-0.0856324	0.53219	0.88131	-0.0869516	0.592878	0.881986	0.0961389	0.30661	0.736639
NM_000081	LYST	-0.483205	0.194796	0.362957	0.291354	0.263901	0.510083	-3.53315	0.450479	0.645753	-0.186344	0.381242	0.64975	1.49532	0.00418405	0.0443297	0.344904	0.0881874	0.487077	0.709273	0.0087256	0.233388	0.31052	0.110186	0.509237	0.56512	0.0328933	0.334503
NM_000083	CLCN1	NA	NA	NA	0.130299	0.334829	0.579456	NA	NA	NA	0.762242	0.0551454	0.214478	-0.114266	0.361234	0.597504	-0.884146	0.993623	0.999859	-0.905279	0.981354	0.999863	-0.522653	0.940606	0.99443	-0.153416	0.572332	0.88496
NM_000084	CLCN5	-2.91744	0.743314	0.770079	-1.11815	0.816878	0.915805	-10.0562	0.961989	0.988653	-0.188649	0.382383	0.650798	-0.306729	0.459793	0.679546	-1.03417	0.997364	0.999859	-1.67146	0.99947	0.999966	-0.985814	0.995283	0.999918	-1.29519	0.99549	0.999781
NM_000085	CLCNKB	0.399332	0.0460543	0.350599	1.13075	0.0384049	0.1807	3.10563	0.000451729	0.00736702	4.88236	4.17e-06	0.000718232	0.965346	0.0292672	0.140302	0.607831	0.00962285	0.228302	0.191976	0.224407	0.707865	0.583539	0.0116059	0.234084	0.213981	0.199895	0.640852
NM_000087	CNGA1	-0.190185	0.131847	0.350599	0.994188	0.057331	0.226073	-0.435406	0.0708461	0.20219	-0.455532	0.523949	0.765023	0.396726	0.141968	0.355175	-0.194298	0.726401	0.941565	-0.502491	0.885371	0.985577	0.0792503	0.36125	0.756391	-0.143199	0.561876	0.88124
NM_000088	COL1A1	-0.69094	0.245553	0.39305	1.0381	0.0506439	0.21041	-3.56254	0.455062	0.649862	-0.499763	0.547212	0.781768	0.260449	0.190891	0.419672	-0.175921	0.705154	0.93383	-0.117432	0.568694	0.897866	-0.0707168	0.571094	0.874294	0.42353	0.0748435	0.453786
NM_000089	COL1A2	0.106011	0.0814726	0.350599	0.549281	0.165985	0.39925	-0.194839	0.0561011	0.173558	1.10666	0.0206245	0.117997	2.57185	2.32e-05	0.00162155	0.268241	0.14412	0.580813	0.452494	0.0577893	0.46382	-0.158012	0.682082	0.915028	-0.138682	0.557284	0.879225
NM_000090	COL3A1	NA	NA	NA	-1.04957	0.800559	0.906489	NA	NA	NA	0.984955	0.0296656	0.146555	-1.1575	0.802189	0.902847	-0.232021	0.766713	0.95482	0.262619	0.163785	0.643797	-0.182529	0.710274	0.926198	0.411489	0.0798256	0.463993
NM_000091	COL4A3	-0.0555226	0.107058	0.350599	0.408418	0.216671	0.460084	1.57638	0.00620101	0.0411872	-0.769859	0.67972	0.86814	-0.898322	0.722766	0.857737	-0.260442	0.794024	0.962344	0.293958	0.140836	0.616641	-0.198295	0.727579	0.931575	-0.0573115	0.46864	0.837648
NM_000092	COL4A4	-0.115554	0.117802	0.350599	1.39872	0.0159914	0.108463	-2.06096	0.233893	0.430866	-0.400903	0.494665	0.742667	0.600921	0.0861297	0.265787	0.458583	0.0375079	0.363066	0.244413	0.178356	0.658188	0.315535	0.106561	0.502415	-0.192559	0.612703	0.90102
NM_000093	COL5A1	0.476347	0.0391242	0.350599	1.05169	0.0486195	0.205684	2.44862	0.00156736	0.0168134	-1.36053	0.879106	0.967946	0.60073	0.086172	0.26583	0.364247	0.0770611	0.462317	0.373902	0.0920173	0.539455	0.578305	0.0122402	0.238618	0.588935	0.0281843	0.313783
NM_000094	COL7A1	-0.187015	0.131245	0.350599	2.20385	0.000561285	0.0157078	-5.67871	0.739124	0.863777	2.00757	0.00109911	0.0197414	0.719227	0.0624082	0.220388	0.510234	0.0239628	0.315195	0.0857182	0.333895	0.78627	0.412937	0.0529592	0.402097	0.471257	0.0576251	0.41484
NM_000095	COMP	-0.132211	0.120883	0.350599	1.26639	0.025014	0.141863	-3.49892	0.445131	0.640773	1.51776	0.00551224	0.0528392	4.44477	2.11e-06	0.000579124	-0.39096	0.889843	0.98878	-0.0862193	0.5329	0.881664	0.0547256	0.39513	0.778675	-0.10639	0.522287	0.86325
NM_000096	CP	-1.21937	0.383001	0.492432	0.0322206	0.380257	0.620012	-4.78653	0.631891	0.788588	-0.77741	0.683222	0.86991	0.654232	0.0745529	0.243694	-0.0857506	0.592	0.889331	0.267533	0.159975	0.639979	0.179306	0.234065	0.661553	0.507991	0.0465649	0.380425
NM_000097	CPOX	-0.318288	0.157922	0.350599	0.369405	0.231456	0.475694	-2.91085	0.355225	0.558742	1.11846	0.0198654	0.115131	0.149827	0.236099	0.475069	-0.00731328	0.48202	0.83801	-0.561089	0.910133	0.990293	-0.262578	0.791048	0.95261	-0.0819653	0.495526	0.850553
NM_000098	CPT2	-0.431108	0.182788	0.356811	-0.518005	0.628185	0.805976	4.45551	2.05e-05	0.000924116	-0.605784	0.601335	0.819043	-1.88702	0.922112	0.965256	-0.464992	0.925338	0.995203	-0.774012	0.965124	0.999258	-0.332872	0.847491	0.969833	-0.152556	0.571429	0.88482
NM_000100	CSTB	-0.911528	0.30242	0.434354	0.570642	0.158999	0.390654	-5.35714	0.703267	0.839362	-0.545928	0.571011	0.798571	1.68632	0.00192525	0.027938	-0.468473	0.92666	0.995323	-0.0952245	0.543404	0.885762	0.19497	0.216361	0.644546	0.370237	0.0988065	0.500039
NM_000101	CYBA	0.181083	0.0711327	0.350599	0.528488	0.173084	0.40862	1.57688	0.00619416	0.0411665	0.505852	0.105344	0.314219	0.897122	0.0364743	0.160163	-0.120645	0.638218	0.909264	0.473885	0.0504006	0.441523	0.245338	0.164361	0.590529	0.125755	0.277776	0.712021
NM_000102	CYP17A1	-0.0693743	0.109541	0.350599	0.0293825	0.381569	0.621186	0.182415	0.0378517	0.135919	0.176517	0.211832	0.471217	-0.0255276	0.316449	0.556162	0.171173	0.243165	0.688271	-0.297543	0.749838	0.955111	-0.0816589	0.58565	0.879458	-0.0694684	0.481738	0.843407
NM_000104	CYP1B1	0.0585587	0.0885093	0.350599	2.16035	0.000683212	0.017315	-1.84608	0.206223	0.398847	-0.246774	0.412524	0.676396	1.76476	0.00133628	0.0219794	0.0876389	0.349131	0.764809	0.173733	0.241824	0.72341	-0.191459	0.720039	0.929026	0.164321	0.242169	0.681834
NM_000106	CYP2D6	NA	NA	NA	0.279578	0.268933	0.51558	NA	NA	NA	-1.08841	0.804886	0.934882	0.640238	0.0774302	0.248961	-0.901749	0.994257	0.999859	0.267763	0.159783	0.639497	-0.754549	0.983091	0.999048	-1.28072	0.995193	0.999781
NM_000107	DDB2	-1.03064	0.333709	0.456818	-0.61645	0.666637	0.830347	-1.19085	0.132389	0.30129	-0.228538	0.40305	0.668616	-2.08673	0.938377	0.971962	0.523844	0.021271	0.301609	-0.218539	0.677366	0.932582	0.356027	0.0805769	0.460536	-0.355608	0.759923	0.954192
NM_000108	DLD	-0.0937457	0.113839	0.350599	0.742812	0.1089	0.320658	-0.494273	0.0746836	0.209038	-0.605788	0.601337	0.819043	-0.0177345	0.312682	0.552408	-0.0305934	0.515481	0.854098	0.507221	0.0405228	0.410665	-0.026782	0.510824	0.845379	0.355146	0.106569	0.514636
NM_000109	DMD	-1.4994	0.454116	0.544593	0.513373	0.178325	0.415265	-4.63092	0.610904	0.773471	-1.44829	0.897048	0.974818	-0.431754	0.523057	0.726868	0.621297	0.00835426	0.215568	0.229914	0.190498	0.672454	0.152881	0.264967	0.686206	-0.0180257	0.425749	0.813407
NM_000110	DPYD	-0.0507738	0.106209	0.350599	0.771343	0.101904	0.309847	5.0755	6.84e-06	0.000442243	1.56326	0.00477811	0.0483609	0.0633215	0.274458	0.514573	-0.129724	0.649665	0.913745	-0.215993	0.674766	0.932164	0.262077	0.149247	0.572294	-0.119455	0.536382	0.868201
NM_000111	SLC26A3	-0.329104	0.160241	0.350599	0.406219	0.217512	0.460937	5.24797	6.84e-06	0.000442243	-1.38326	0.883842	0.970064	-0.205555	0.407932	0.637574	-0.250293	0.784475	0.960627	-0.41965	0.840125	0.977472	-0.0731516	0.574235	0.87503	-0.57332	0.890212	0.986744
NM_000112	SLC26A2	-1.72234	0.507854	0.58375	-0.648707	0.678787	0.837663	-3.39847	0.430094	0.627921	0.0148055	0.281917	0.552633	-2.857	0.972721	0.987593	-0.526719	0.946619	0.998167	0.00410596	0.426882	0.835529	-0.152245	0.675565	0.913443	-0.574266	0.890613	0.98682
NM_000113	TOR1A	0.402907	0.0457235	0.350599	0.313433	0.25454	0.499771	0.250357	0.0352212	0.129698	1.01918	0.0268	0.138005	0.746444	0.0576373	0.209792	0.358971	0.0799576	0.469975	0.697796	0.00959274	0.239063	-0.0278893	0.512422	0.845904	0.582749	0.0293123	0.318861
NM_000115	EDNRB	-0.426226	0.181666	0.355914	0.500096	0.182933	0.42063	-1.51906	0.167149	0.349977	-0.360123	0.472585	0.72601	-0.32582	0.469643	0.687315	0.085311	0.352252	0.767729	0.263161	0.163376	0.643338	0.346123	0.0864942	0.469734	0.155322	0.250216	0.687401
NM_000116	TAZ	-1.7533	0.515116	0.589048	-1.66959	0.90697	0.959446	-3.26407	0.409152	0.607961	-1.33142	0.872543	0.965621	-0.748126	0.667189	0.825354	0.0128277	0.453515	0.824311	-0.36477	0.802992	0.968899	0.182017	0.230996	0.65973	0.151253	0.253835	0.690328
NM_000117	EMD	0.403502	0.0456696	0.350599	0.780196	0.0996964	0.306347	-0.353047	0.0656718	0.192571	2.46685	0.000239844	0.00788866	2.12419	0.000251212	0.00765731	0.166084	0.249038	0.691592	0.390754	0.0835707	0.522592	0.51105	0.0230954	0.2958	0.546121	0.0370364	0.352038
NM_000119	EPB42	-0.256146	0.144987	0.350599	1.25746	0.0257603	0.143719	-0.484771	0.0740333	0.207877	-0.963204	0.760531	0.912687	-0.612405	0.609026	0.788228	-0.281336	0.812533	0.968519	0.23696	0.184603	0.666824	-0.452582	0.914445	0.987823	-0.527625	0.869651	0.984391
NM_000120	EPHX1	-0.44438	0.18578	0.358567	1.03099	0.0516656	0.21263	-3.25975	0.408502	0.607383	-0.168939	0.372253	0.642295	0.620177	0.081667	0.256651	0.185161	0.226922	0.672947	-0.342936	0.786764	0.964293	0.0169083	0.448601	0.808867	0.0823528	0.320487	0.745777
NM_000121	EPOR	-1.67883	0.497626	0.576788	0.117217	0.3407	0.584542	-6.25043	0.794698	0.899884	-1.25918	0.854763	0.957239	0.67705	0.070124	0.235025	-0.43671	0.91336	0.994423	-0.376332	0.811172	0.970048	-0.460991	0.918114	0.989024	-0.25509	0.673764	0.924259
NM_000122	ERCC3	-1.04753	0.338139	0.460445	0.122155	0.338484	0.582903	-5.48121	0.717539	0.848287	0.0473849	0.266869	0.535442	1.12156	0.0174096	0.102422	-0.163698	0.690776	0.928563	-0.889392	0.979831	0.999863	-0.233578	0.763886	0.944534	-0.167519	0.586943	0.890772
NM_000123	ERCC5	-0.738245	0.257382	0.401632	0.709256	0.117634	0.333326	-3.26536	0.409335	0.6081	-0.344641	0.46429	0.719169	-0.0522335	0.329788	0.56858	0.344268	0.0885768	0.488056	0.319539	0.123658	0.592325	0.659378	0.00531117	0.174526	1.05987	0.000764775	0.0719047
NM_000125	ESR1	0.298009	0.0567202	0.350599	1.30572	0.021888	0.130724	-2.19264	0.251287	0.451055	3.33803	1.88e-05	0.00153257	0.374191	0.149332	0.365036	0.108907	0.320597	0.744754	0.592013	0.0221623	0.337918	0.368143	0.0739269	0.446516	0.122973	0.280488	0.71448
NM_000127	EXT1	-2.06836	0.585229	0.641653	-3.61944	0.986798	0.995521	-2.66954	0.318752	0.522652	-0.085389	0.330117	0.603069	-1.89905	0.923311	0.965838	-0.158635	0.684883	0.926196	-0.692462	0.949826	0.996418	-0.0945056	0.602862	0.886681	-0.752933	0.947186	0.997236
NM_000128	F11	0.11785	0.0797603	0.350599	0.19871	0.303884	0.551449	-3.66529	0.470813	0.662466	7.10017	2.09e-06	0.000718232	-1.7371	0.906665	0.957525	0.393677	0.0619885	0.431352	0.142402	0.273314	0.747814	0.200209	0.21063	0.640395	-0.26489	0.682713	0.927153
NM_000129	F13A1	-0.282653	0.150406	0.350599	-0.192567	0.485756	0.706331	-0.897847	0.10531	0.260387	-0.752636	0.671843	0.862862	0.712437	0.0635735	0.222642	0.178898	0.234204	0.680467	0.158628	0.256662	0.735511	-0.0273328	0.511641	0.845672	0.517208	0.0440859	0.373909
NM_000130	F5	0.0681011	0.0870594	0.350599	-0.982623	0.783722	0.89828	-0.277172	0.0609332	0.183689	0.955595	0.0323956	0.155012	0.59187	0.0881648	0.269699	0.553862	0.0163633	0.276548	-0.161306	0.617581	0.913285	0.121361	0.304836	0.71561	-0.241512	0.661277	0.919794
NM_000132	F8	0.313492	0.0549526	0.350599	0.2999	0.260192	0.506031	1.12453	0.0118864	0.0635379	0.711236	0.0632396	0.232964	0.808006	0.048068	0.18883	0.461114	0.0368033	0.36052	0.30724	0.131637	0.602878	0.217543	0.19216	0.624056	0.268072	0.159527	0.592018
NM_000133	F9	-0.0600976	0.107901	0.350599	0.879715	0.0779598	0.267967	2.13446	0.00254839	0.0227461	2.98038	5.42e-05	0.00324905	1.51933	0.00374495	0.0409581	0.0913387	0.344144	0.761893	-0.0852359	0.53177	0.881304	0.157981	0.25869	0.679218	-0.404474	0.796076	0.963642
NM_000134	FABP2	-1.03695	0.335364	0.458086	0.835381	0.0872746	0.284966	-4.4959	0.592547	0.759475	-1.09551	0.807222	0.936062	0.608239	0.0844388	0.262663	-0.392206	0.890548	0.988841	-0.0799614	0.525531	0.87955	-0.155989	0.67983	0.914521	0.188762	0.220829	0.663829
NM_000137	FAH	-0.147038	0.123621	0.350599	-0.749126	0.713732	0.859202	0.837877	0.0173368	0.0820186	3.38631	1.67e-05	0.00144361	-0.626361	0.615125	0.792281	0.092016	0.343237	0.761675	-0.375048	0.810319	0.970048	-0.0702736	0.570532	0.874238	-0.234848	0.654862	0.917219
NM_000138	FBN1	-0.644614	0.233889	0.384573	0.0330786	0.379847	0.619799	-0.527699	0.0768669	0.212751	-1.14149	0.821842	0.942383	-0.942345	0.738223	0.867055	-0.126607	0.645528	0.911592	-0.263324	0.719857	0.947551	-0.0197572	0.501095	0.84065	0.67316	0.0160753	0.251882
NM_000140	FECH	-0.057342	0.10739	0.350599	0.542494	0.168417	0.402652	-1.02727	0.116945	0.278506	1.09961	0.0210667	0.119403	-0.844199	0.70369	0.847001	0.0693239	0.374173	0.781002	0.406822	0.0760193	0.507045	0.504959	0.0243539	0.300466	-0.159979	0.579199	0.887519
NM_000143	FH	-0.280587	0.149981	0.350599	0.533719	0.171371	0.406498	2.39704	0.00169284	0.0176277	-0.284609	0.432272	0.694487	0.18972	0.219027	0.45524	-0.500409	0.938282	0.996872	-0.622342	0.931141	0.994194	-0.229152	0.759568	0.94332	0.229556	0.187695	0.627913
NM_000146	FTL	-0.159423	0.125948	0.350599	0.169965	0.316683	0.562558	-2.8914	0.352269	0.556071	2.23859	0.000531828	0.013032	-0.15485	0.382061	0.616149	0.0217231	0.440859	0.817203	0.68277	0.0108292	0.251886	0.48774	0.0283825	0.319164	0.49438	0.0502603	0.390192
NM_000147	FUCA1	-0.266029	0.146991	0.350599	-0.398883	0.578164	0.772044	0.859971	0.0167824	0.0801681	1.10851	0.0205098	0.117602	0.437282	0.129418	0.338016	-0.0947139	0.604032	0.894872	-0.214426	0.673208	0.931665	-0.240687	0.770865	0.947698	-0.514291	0.862772	0.982614
NM_000148	FUT1	-0.651882	0.235724	0.385915	-0.471058	0.608866	0.792508	-0.530641	0.0770631	0.213027	-1.16932	0.830007	0.945463	-0.436511	0.525417	0.728941	0.18521	0.226856	0.672947	0.416787	0.0717338	0.498802	0.25371	0.156601	0.581799	0.20775	0.204739	0.646795
NM_000149	FUT3	-0.457482	0.188754	0.359704	0.171086	0.316222	0.562246	-1.37439	0.151213	0.328125	0.250334	0.183493	0.433902	-0.419171	0.516833	0.72225	-0.352463	0.866296	0.981758	-1.01124	0.988793	0.999863	-0.105921	0.617961	0.893154	-0.360306	0.763679	0.955296
NM_000150	FUT6	NA	NA	NA	NA	NA	NA	NA	NA	NA	NA	NA	NA	NA	NA	NA	-0.270644	0.803235	0.965975	0.0010059	0.430511	0.837341	0.125195	0.299905	0.712379	0.494176	0.0503145	0.390351
NM_000151	G6PC	0.150394	0.0752638	0.350599	1.63536	0.00658196	0.0650254	-0.791331	0.0964647	0.246084	1.67895	0.00329734	0.0380013	0.886881	0.0376374	0.162876	-0.0675012	0.567054	0.878321	0.0802681	0.339949	0.790328	0.234914	0.174624	0.602964	0.353897	0.107251	0.515638
NM_000154	GALK1	NA	NA	NA	NA	NA	NA	NA	NA	NA	1.60727	0.00412323	0.0440597	2.19167	0.000198436	0.00697067	0.402239	0.0580924	0.42236	-0.335541	0.781087	0.963054	-0.561385	0.951495	0.995712	-0.488611	0.848878	0.97993
NM_000155	GALT	-0.332228	0.160916	0.350599	0.711791	0.116949	0.332095	-2.10042	0.23912	0.437284	0.332119	0.155217	0.394277	-0.272404	0.442352	0.66642	0.159618	0.256798	0.697376	0.16606	0.249383	0.728109	0.342429	0.0886661	0.47369	0.0528941	0.350465	0.767746
NM_000156	GAMT	-0.300604	0.154112	0.350599	1.47557	0.0119888	0.0910518	1.2242	0.0103578	0.058106	0.788762	0.051385	0.205672	-0.641083	0.621648	0.796201	-0.523636	0.945619	0.997945	-0.219064	0.677952	0.932648	0.141421	0.279284	0.698137	-0.601138	0.901551	0.989375
NM_000158	GBE1	-0.252169	0.144176	0.350599	0.828596	0.0887566	0.28749	0.718048	0.0202388	0.090644	1.69918	0.00308252	0.0363753	-1.55519	0.882342	0.944968	-0.179532	0.709502	0.93567	-0.403916	0.829922	0.974747	-0.131446	0.650035	0.903636	-0.293783	0.708537	0.934793
NM_000159	GCDH	-0.399234	0.175562	0.353461	1.58491	0.0080619	0.0733097	-4.01986	0.524256	0.708505	0.4785	0.112278	0.326992	0.359514	0.154219	0.370991	0.2289	0.180379	0.624412	-0.112467	0.563053	0.895511	0.0464896	0.406873	0.785452	-0.163171	0.582531	0.888668
NM_000160	GCGR	-0.848485	0.285847	0.422022	0.227867	0.291103	0.538929	-3.62736	0.465016	0.658207	-0.742087	0.666884	0.859381	0.747639	0.0574515	0.209325	-0.480584	0.931357	0.995721	-0.91833	0.982485	0.999863	-0.664493	0.972135	0.998135	-0.0298507	0.438541	0.819861
NM_000161	GCH1	-0.696596	0.246955	0.393802	0.356323	0.236618	0.481606	-3.31596	0.417304	0.615881	-0.608271	0.602537	0.820027	0.781526	0.0519797	0.197335	0.32394	0.101339	0.512666	0.879732	0.00199121	0.141866	-0.0802995	0.583806	0.878451	0.437833	0.0692733	0.442875
NM_000162	GCK	0.810742	0.017757	0.350599	1.20185	0.0308833	0.15871	-0.278274	0.0610131	0.183788	0.929184	0.0350339	0.162893	1.3902	0.00630774	0.0563393	0.231579	0.177684	0.621155	0.860803	0.00239668	0.149936	0.963522	0.0001385	0.0451798	1.41827	4.62e-05	0.0217227
NM_000163	GHR	-1.34947	0.41635	0.516956	-0.944949	0.77356	0.89215	-1.43029	0.157266	0.336554	-1.41984	0.891411	0.97263	-1.6028	0.88949	0.949174	0.476956	0.0322408	0.347659	0.612165	0.0191253	0.319765	0.307446	0.112418	0.513469	0.28224	0.150028	0.580372
NM_000164	GIPR	-0.239255	0.141582	0.350599	1.23078	0.028121	0.150442	-0.787876	0.0962251	0.245711	0.529519	0.0994456	0.303454	-0.0943647	0.351038	0.588485	0.0753041	0.365781	0.775019	-0.56381	0.911194	0.990293	-0.160121	0.684483	0.915925	-0.308392	0.721136	0.939062
NM_000165	GJA1	-0.0188562	0.100841	0.350599	0.297986	0.261027	0.506734	-1.13758	0.127212	0.293836	1.23188	0.0137963	0.092488	-0.467715	0.540842	0.740946	0.0133085	0.452766	0.824271	0.119842	0.296835	0.763736	-0.35626	0.86311	0.974134	0.374093	0.0968454	0.496371
NM_000166	GJB1	-0.940804	0.310149	0.440563	1.06458	0.0468494	0.200809	-5.3771	0.705514	0.840818	0.225587	0.192774	0.446255	0.323723	0.166707	0.387963	0.308925	0.111947	0.531196	0.354586	0.102493	0.557207	-0.155797	0.679607	0.914461	-0.327252	0.737223	0.94518
NM_000168	GLI3	-0.0859194	0.112443	0.350599	4.11908	2.1e-06	0.000397831	2.47164	0.00148751	0.0161926	3.54901	1.04e-05	0.00103335	2.28518	0.000132994	0.00556211	0.054521	0.394888	0.793623	-0.472489	0.87037	0.98408	0.38794	0.0640151	0.42993	-0.313649	0.725723	0.941438
NM_000169	GLA	-2.96538	0.750933	0.776582	-1.61486	0.900495	0.955979	-8.99934	0.941554	0.981668	-0.887749	0.730822	0.896099	-0.359584	0.486671	0.69918	-0.134377	0.655528	0.915024	-0.492267	0.880465	0.985082	0.0996088	0.333586	0.739978	-0.526125	0.86885	0.984284
NM_000170	GLDC	-3.95273	0.874177	0.88517	-1.22126	0.8386	0.927726	-16.0442	0.998444	0.999924	1.34171	0.00970013	0.0747016	0.112789	0.25224	0.491886	0.010934	0.456212	0.824879	-0.0921326	0.539887	0.884457	0.165131	0.250041	0.673664	0.286536	0.147214	0.576805
NM_000171	GLRA1	-0.970396	0.317878	0.445866	0.055034	0.369755	0.610869	-3.69406	0.475159	0.666468	0.805247	0.049264	0.201026	-1.0478	0.771526	0.884882	-0.0666608	0.565862	0.877839	-0.490097	0.879353	0.985082	0.304396	0.114748	0.517339	-0.547207	0.878863	0.985435
NM_000172	GNAT1	-1.16241	0.368279	0.482335	1.3079	0.0217051	0.129893	-7.23605	0.867738	0.943878	0.584709	0.0869925	0.281313	0.693802	0.0669448	0.228883	0.0803616	0.358894	0.771684	-0.496924	0.882703	0.985186	-0.183159	0.710967	0.926439	-0.379257	0.778029	0.958954
NM_000173	GP1BA	-0.330991	0.160675	0.350599	-0.70752	0.699599	0.851108	-2.77736	0.33493	0.539098	-0.751074	0.671161	0.862305	2.91199	4.22e-06	0.000579124	0.497213	0.0269898	0.327584	0.271955	0.156677	0.637485	0.459541	0.0361786	0.348005	1.06321	0.000754738	0.071529
NM_000174	GP9	-0.802786	0.273984	0.413389	-1.01933	0.792888	0.902361	-1.73408	0.192464	0.382458	0.675438	0.0694172	0.246258	-1.13317	0.795754	0.898846	-0.0337994	0.519841	0.855409	0.645299	0.0147976	0.291416	-0.00901027	0.485649	0.830057	0.37645	0.0956229	0.494691
NM_000175	GPI	-0.28339	0.150552	0.350599	-0.48684	0.615499	0.79723	-0.236873	0.0585719	0.178947	-1.45333	0.897999	0.975188	1.04348	0.0225309	0.119341	-0.42859	0.909665	0.993534	-0.222908	0.681693	0.933845	-0.0670343	0.56616	0.872596	0.428882	0.0726877	0.451075
NM_000177	GSN	0.452251	0.0411652	0.350599	0.761924	0.104204	0.31314	0.346488	0.0316324	0.120958	0.965458	0.0314696	0.152088	0.0316912	0.289176	0.529965	0.446287	0.041418	0.376352	0.201434	0.215677	0.699183	0.456058	0.0371943	0.350897	0.705225	0.0128647	0.229556
NM_000178	GSS	-1.46014	0.444366	0.537238	-0.072352	0.429089	0.662379	-4.27839	0.562099	0.737473	-1.14469	0.822761	0.942622	-0.345127	0.47943	0.6939	-0.402217	0.895971	0.989588	-0.331823	0.778231	0.962138	0.12977	0.294037	0.707945	-0.390929	0.786634	0.960878
NM_000179	MSH6	-0.68379	0.243721	0.391585	-1.3097	0.855304	0.934843	-5.31389	0.69812	0.835928	5.24717	2.09e-06	0.000718232	-1.35875	0.848146	0.928042	-0.400171	0.894891	0.989472	-0.34807	0.790616	0.965537	0.128462	0.295687	0.708676	-0.103366	0.519027	0.861464
NM_000180	GUCY2D	-1.64649	0.489941	0.57159	0.0508738	0.371632	0.612875	-6.69956	0.831685	0.922684	0.170458	0.214254	0.474275	-0.107735	0.357791	0.594151	0.0702397	0.372993	0.780442	-0.175551	0.632778	0.918184	-0.124771	0.641931	0.901013	0.203171	0.208603	0.651869
NM_000182	HADHA	-0.117095	0.118105	0.350599	1.56982	0.00852228	0.075707	-1.2587	0.13903	0.311178	0.54023	0.0968741	0.298781	-1.31973	0.84017	0.924677	0.896846	0.000381381	0.0665314	0.421326	0.0697326	0.494972	0.293717	0.122801	0.530395	0.604737	0.0254242	0.299945
NM_000184	HBG2	-0.791493	0.2711	0.411641	0.283748	0.267104	0.513396	-2.02303	0.228871	0.42527	-0.325038	0.453773	0.711384	-0.248238	0.430108	0.655647	-0.831199	0.991272	0.999859	-0.746617	0.960537	0.998018	-0.714952	0.97885	0.998842	-0.873203	0.968708	0.998677
NM_000185	SERPIND1	-2.66917	0.702001	0.736195	0.327224	0.248706	0.493267	-9.60159	0.954658	0.98611	-0.184092	0.380124	0.64891	-1.21823	0.817276	0.910823	-0.0385099	0.526471	0.858691	-0.0718106	0.516057	0.875116	-0.119181	0.634782	0.89827	0.345101	0.111681	0.524161
NM_000186	CFH	-2.04479	0.580254	0.638076	-0.32422	0.545479	0.74987	-5.17695	0.681734	0.823791	-1.32325	0.870641	0.964476	-1.35472	0.847339	0.928042	0.397721	0.0601358	0.427277	-0.542057	0.902692	0.988828	-0.219976	0.750491	0.940738	-0.210329	0.630534	0.908668
NM_000187	HGD	-2.46204	0.664368	0.705582	-2.02904	0.939003	0.97425	-3.47032	0.440794	0.637309	-0.805958	0.695909	0.877521	-3.54283	0.985966	0.993664	0.0923364	0.342776	0.761577	-0.066994	0.510385	0.872146	-0.0660112	0.564751	0.871618	0.0162579	0.389244	0.792484
NM_000188	HK1	-0.269601	0.147739	0.350599	-0.994441	0.786682	0.89983	1.62554	0.00577209	0.0393071	-0.378113	0.482241	0.732203	-1.33139	0.84268	0.926112	-0.132236	0.652798	0.914913	0.248109	0.175301	0.655364	0.402219	0.0575076	0.414458	-0.150337	0.569157	0.884241
NM_000189	HK2	0.0354164	0.0921069	0.350599	-0.480863	0.613075	0.795698	0.265683	0.0345892	0.12795	0.372155	0.142455	0.374221	0.4122	0.137138	0.349118	-0.00936026	0.48493	0.838498	0.379622	0.0890485	0.533504	-0.0768959	0.579293	0.877304	-0.1517	0.570566	0.884806
NM_000191	HMGCL	-1.13748	0.361777	0.477346	-1.38134	0.867766	0.94083	-3.35592	0.423525	0.621627	-0.328389	0.45561	0.71315	0.51573	0.107267	0.303894	0.370611	0.073725	0.455858	0.251164	0.172766	0.653091	0.293392	0.123064	0.531108	0.151834	0.253329	0.690038
NM_000192	TBX5	-0.564731	0.214259	0.372544	0.836228	0.0870644	0.284481	-2.58139	0.306409	0.510905	-1.40729	0.888871	0.971584	0.893529	0.0368732	0.161152	0.17052	0.243883	0.688334	-0.161594	0.617872	0.913285	-0.241669	0.77177	0.947981	0.00694136	0.398977	0.798393
NM_000193	SHH	NA	NA	NA	NA	NA	NA	NA	NA	NA	NA	NA	NA	-0.538149	0.57473	0.762996	0.645543	0.0065999	0.194997	-0.333531	0.779517	0.962349	0.335103	0.093351	0.480319	0.049165	0.354243	0.770136
NM_000194	HPRT1	-0.0285412	0.10246	0.350599	1.54609	0.00922232	0.07857	3.32951	0.000287464	0.00544334	1.48534	0.00608787	0.0562413	-0.0413615	0.324323	0.563585	-0.160069	0.686593	0.926712	-0.128467	0.581281	0.901022	0.104815	0.326655	0.733816	0.0695562	0.333398	0.754685
NM_000195	HPS1	-0.286912	0.151265	0.350599	1.75196	0.00413711	0.0496196	0.185121	0.0377399	0.135738	-1.30607	0.866595	0.962661	-0.222215	0.416541	0.644677	-0.432862	0.911622	0.993807	-0.430094	0.84643	0.97904	-0.228207	0.758631	0.94331	-0.0564847	0.467719	0.837039
NM_000196	HSD11B2	-0.257805	0.145329	0.350599	1.55649	0.00887966	0.0772295	-3.11704	0.386776	0.587542	0.0686693	0.257269	0.525554	0.973582	0.0284291	0.137854	-0.359954	0.871177	0.9831	-0.26178	0.71844	0.946957	-0.340147	0.852467	0.970875	-0.0693383	0.481573	0.843384
NM_000197	HSD17B3	-2.12663	0.59753	0.651921	-1.34072	0.860845	0.937559	-5.35914	0.70352	0.839481	-0.533336	0.564608	0.794024	-1.27333	0.829942	0.9182	-0.0327563	0.51842	0.855152	-0.650781	0.93932	0.995434	-0.430585	0.904614	0.98501	-0.125372	0.542817	0.871824
NM_000198	HSD3B2	-0.576493	0.217155	0.374207	-0.181556	0.480511	0.702019	1.22752	0.0103259	0.0580005	0.392134	0.136321	0.364845	0.140174	0.240317	0.479551	-0.307807	0.834027	0.974007	-0.719728	0.955451	0.997023	-0.40788	0.893162	0.982172	-0.870556	0.968311	0.998677
NM_000199	SGSH	-1.21938	0.383001	0.492432	-0.752092	0.714648	0.859589	-3.25614	0.407959	0.606906	0.115508	0.237089	0.501942	-0.984785	0.751999	0.875292	-0.0992877	0.610286	0.897807	0.245305	0.177597	0.657315	-0.378753	0.877126	0.979008	0.400461	0.0845287	0.472558
NM_000200	HTN3	-0.0825615	0.111863	0.350599	0.768915	0.10249	0.310713	-0.764654	0.0942813	0.242569	0.31326	0.161423	0.402829	-0.647767	0.624675	0.79796	0.601517	0.0102391	0.232907	0.0988802	0.319333	0.778318	0.326095	0.0992884	0.491008	0.394334	0.0871823	0.476776
NM_000201	ICAM1	0.0621967	0.0879315	0.350599	3.65436	2.1e-06	0.000397831	-3.41018	0.431778	0.629547	0.716371	0.0623845	0.231156	1.5856	0.0028731	0.0349381	-0.193134	0.725209	0.941133	0.264968	0.161953	0.641993	0.151845	0.266235	0.687832	0.0251075	0.380093	0.787877
NM_000202	IDS	0.220559	0.0660251	0.350599	0.0135272	0.38896	0.627467	1.17622	0.0110445	0.0605438	1.00581	0.0278741	0.141092	0.380265	0.147316	0.362121	-0.024142	0.506133	0.850486	0.335889	0.113455	0.575126	0.367011	0.0744989	0.448373	0.203479	0.208346	0.651869
NM_000203	IDUA	-0.378695	0.171022	0.351978	-0.370157	0.565893	0.763653	0.764681	0.0191004	0.0873614	-0.620023	0.608244	0.823252	-1.28928	0.833624	0.920678	0.183745	0.228578	0.675266	0.167885	0.247549	0.726971	0.074724	0.367356	0.760849	-0.0467516	0.456936	0.830967
NM_000204	CFI	-0.513038	0.201844	0.366431	1.32834	0.0202672	0.1248	-4.84298	0.639511	0.794013	1.32693	0.0101986	0.0769557	0.135564	0.24232	0.481498	-0.100155	0.611398	0.897807	0.0850509	0.334632	0.786755	-0.0687985	0.568486	0.873661	-0.0844707	0.498328	0.85189
NM_000206	IL2RG	NA	NA	NA	-0.915883	0.765248	0.887753	NA	NA	NA	0.155239	0.220548	0.482323	0.138597	0.240984	0.480184	0.403759	0.0574019	0.420587	-0.201027	0.659396	0.92861	0.0130154	0.454047	0.811837	0.117485	0.285735	0.71836
NM_000208	INSR	0.0946654	0.0830937	0.350599	1.08671	0.0438664	0.193724	0.656346	0.0219499	0.0958595	-0.92574	0.745894	0.905255	-0.252982	0.432521	0.657667	0.055018	0.394152	0.793358	0.225691	0.194234	0.678273	0.0865425	0.351134	0.750238	0.0114103	0.394457	0.796317
NM_000209	PDX1	-3.0219	0.759744	0.784254	-1.87235	0.926861	0.968098	-9.77299	0.957699	0.987138	-0.449682	0.520752	0.762841	0.00743731	0.300662	0.541329	-0.18899	0.720291	0.939622	0.996927	0.000650356	0.0879585	0.561602	0.0144341	0.249599	0.726237	0.011036	0.214791
NM_000211	ITGB2	0.201594	0.0684254	0.350599	1.70843	0.00493174	0.05514	-1.931	0.216905	0.411714	0.220793	0.194589	0.448906	0.808154	0.0480427	0.188763	0.559235	0.0155323	0.27308	0.09833	0.319945	0.779177	0.476171	0.0313853	0.329248	0.00759428	0.398295	0.798097
NM_000212	ITGB3	0.0214211	0.0943369	0.350599	1.39275	0.0163193	0.109977	3.35942	0.000264649	0.00511208	-0.7239	0.658499	0.854822	0.212544	0.20985	0.443447	-0.533293	0.948499	0.998324	-0.262373	0.718948	0.947156	0.017125	0.448308	0.808642	0.864225	0.00396237	0.137778
NM_000213	ITGB4	NA	NA	NA	NA	NA	NA	NA	NA	NA	NA	NA	NA	-0.236873	0.424061	0.650572	-0.783031	0.988067	0.999859	-1.32554	0.997577	0.999863	-0.611579	0.962916	0.996692	-0.779836	0.953038	0.997599
NM_000214	JAG1	-0.536583	0.207487	0.369335	-0.0035439	0.396827	0.634395	-1.48121	0.163013	0.344751	-1.14727	0.823548	0.942847	0.485694	0.115213	0.316025	-0.0131301	0.490342	0.841534	0.0392514	0.386074	0.814587	0.416448	0.0515862	0.397798	0.13483	0.269128	0.703527
NM_000215	JAK3	-0.410643	0.178126	0.354224	0.619854	0.143479	0.36959	-3.22595	0.403451	0.603374	0.220356	0.194764	0.449148	0.74317	0.0582157	0.210995	0.419859	0.0508281	0.401698	0.146854	0.268685	0.744962	0.351769	0.0831221	0.465013	0.142658	0.261778	0.697491
NM_000216	ANOS1	NA	NA	NA	0.445793	0.202677	0.443503	NA	NA	NA	0.963445	0.0316636	0.152675	-2.6226	0.965585	0.984076	-0.278693	0.810203	0.967683	-0.0468703	0.48651	0.861249	0.0174296	0.447927	0.808642	-0.171404	0.590946	0.892113
NM_000217	KCNA1	0.247053	0.0627276	0.350599	1.19795	0.0313121	0.160118	0.833089	0.0174463	0.0823252	2.16353	0.000652793	0.0146251	1.89273	0.000738858	0.0154084	0.284648	0.130537	0.561749	0.322645	0.121769	0.588155	0.194213	0.21716	0.645975	0.186705	0.222592	0.666011
NM_000218	KCNQ1	NA	NA	NA	NA	NA	NA	NA	NA	NA	1.73313	0.00272797	0.0337366	NA	NA	NA	-0.293776	0.822889	0.971392	0.00933203	0.420999	0.831934	-0.0663494	0.565182	0.8719	-0.884466	0.97032	0.999171
NM_000219	KCNE1	-1.18443	0.373968	0.486107	0.987333	0.0583821	0.228346	-6.96077	0.850309	0.934255	0.677211	0.0691314	0.245824	0.558514	0.0962648	0.284894	0.331504	0.0962787	0.503685	-0.249219	0.706808	0.942449	-0.252838	0.78236	0.95039	0.151976	0.253207	0.689863
NM_000220	KCNJ1	-0.0666959	0.109057	0.350599	0.170761	0.316348	0.562282	-1.08137	0.121962	0.28638	0.0809069	0.251778	0.519092	0.562916	0.0951354	0.283249	0.204537	0.205456	0.648715	0.496953	0.0434233	0.418428	0.0566758	0.392477	0.776761	0.192628	0.217523	0.662406
NM_000221	KHK	-1.13511	0.361164	0.477168	-0.388239	0.573589	0.769323	-3.16178	0.393442	0.593484	-1.08696	0.804467	0.934755	0.0965349	0.259394	0.499205	0.520621	0.0219013	0.305147	0.636076	0.0158614	0.297481	0.213001	0.196812	0.627154	0.559832	0.0340254	0.339287
NM_000223	KRT12	-0.408421	0.177639	0.353958	0.862079	0.0816155	0.274845	-1.62439	0.179334	0.365685	-1.11289	0.81283	0.938507	0.24152	0.198189	0.429214	-0.123605	0.641893	0.910764	0.162881	0.252392	0.731105	0.0275632	0.433623	0.801225	0.327667	0.12138	0.541524
NM_000224	KRT18	-2.17504	0.607536	0.659662	0.221168	0.294036	0.54132	-6.62877	0.826351	0.919597	-1.70282	0.937088	0.986659	-0.589739	0.598783	0.780583	0.286836	0.12878	0.55845	0.529078	0.0348844	0.393055	0.615904	0.00836219	0.20724	1.0748	0.000700542	0.0704583
NM_000226	KRT9	NA	NA	NA	0.610902	0.146189	0.373767	NA	NA	NA	3.85519	6.26e-06	0.000718232	-2.26846	0.949952	0.976833	0.267579	0.144638	0.581594	0.664673	0.0126398	0.270132	0.317951	0.104989	0.500878	0.124668	0.278852	0.712905
NM_000228	LAMB3	-0.657717	0.237196	0.386794	0.533387	0.171461	0.406604	-2.82736	0.342545	0.546973	-0.786491	0.687295	0.872549	0.449599	0.125671	0.332221	-0.591222	0.963052	0.999859	-0.682206	0.94742	0.996248	-0.465137	0.919865	0.989676	-0.421691	0.807949	0.96665
NM_000229	LCAT	-2.23573	0.619932	0.669714	-0.702338	0.697749	0.84999	-10.6001	0.969095	0.990481	0.801326	0.049727	0.20208	1.55819	0.00319187	0.0370733	-0.067861	0.56755	0.878471	-0.434179	0.848909	0.97978	-0.1889	0.71732	0.928329	-0.353131	0.757888	0.953387
NM_000230	LEP	NA	NA	NA	3.95743	2.1e-06	0.000397831	NA	NA	NA	NA	NA	NA	NA	NA	NA	0.585328	0.0120356	0.247819	0.866653	0.00225416	0.148556	0.457942	0.0366704	0.350275	0.136305	0.267711	0.702502
NM_000231	SGCG	0.0943911	0.0831354	0.350599	1.46699	0.0124029	0.0928531	2.12796	0.00258946	0.0229899	-0.134318	0.354523	0.624903	0.0639871	0.274156	0.514333	0.338541	0.0919952	0.494918	-0.141339	0.595738	0.906366	0.280895	0.133283	0.546049	-0.100534	0.516026	0.859999
NM_000232	SGCB	-1.42209	0.434872	0.530633	-0.57329	0.650082	0.820597	-3.07609	0.380356	0.581719	-1.48372	0.903635	0.977677	-0.555252	0.582748	0.768372	0.266107	0.145933	0.583057	-0.114256	0.565039	0.895859	0.235477	0.174014	0.602171	-0.180526	0.600198	0.894947
NM_000233	LHCGR	-1.79272	0.524182	0.595792	0.311672	0.255341	0.500704	-5.11824	0.674408	0.818695	-1.80143	0.948181	0.990575	-0.56289	0.586244	0.771173	-0.367317	0.875896	0.984082	0.00150039	0.429939	0.836747	0.138864	0.282536	0.700774	-0.076883	0.489907	0.848514
NM_000234	LIG1	-2.2236	0.617474	0.667781	-1.38072	0.867673	0.94083	-8.02848	0.908796	0.964952	0.287507	0.170302	0.415986	0.227289	0.203838	0.436223	0.283175	0.131731	0.563425	0.820824	0.00338626	0.164967	0.861579	0.000505826	0.0688477	0.83829	0.0047954	0.149698
NM_000235	LIPA	-2.00007	0.570609	0.630784	0.190409	0.307586	0.554617	-7.34873	0.874504	0.947433	-1.35457	0.877771	0.967489	0.512607	0.107983	0.304872	0.555845	0.0160722	0.275316	0.700177	0.00940808	0.23796	0.282431	0.132073	0.544944	0.484387	0.0533576	0.401748
NM_000236	LIPC	0.347803	0.0512769	0.350599	0.76533	0.103323	0.311791	0.236278	0.0357801	0.131036	1.18505	0.0160529	0.101012	1.07588	0.0203228	0.111886	0.31886	0.104824	0.517839	0.557931	0.0283306	0.364899	0.280515	0.13362	0.546958	0.233905	0.184345	0.624075
NM_000237	LPL	0.234246	0.0643092	0.350599	1.62002	0.00701291	0.067852	-0.284349	0.0613827	0.184604	0.318051	0.15979	0.400667	0.615107	0.0828703	0.259131	0.239277	0.170235	0.611349	0.298472	0.137691	0.611599	0.0422606	0.41282	0.789396	0.356974	0.105633	0.513345
NM_000239	LYZ	-0.101614	0.115265	0.350599	0.905112	0.0728977	0.258376	-0.222913	0.0577346	0.177148	0.962097	0.0317804	0.153111	-0.534173	0.572976	0.761852	0.133897	0.288216	0.720327	0.101918	0.316071	0.777245	-0.210687	0.740929	0.937472	-0.431585	0.814441	0.968572
NM_000240	MAOA	0.139353	0.0767563	0.350599	2.93601	1.68e-05	0.00207638	5.49351	4.56e-06	0.000442243	1.57701	0.00458624	0.0473489	0.967901	0.0290097	0.139678	0.0458115	0.407062	0.799662	0.309075	0.130452	0.60115	0.582202	0.0117344	0.234228	-0.379675	0.77832	0.958954
NM_000242	MBL2	-2.1699	0.606476	0.658902	-0.534676	0.635097	0.810655	-7.53996	0.885113	0.952702	-0.620268	0.608347	0.823304	0.0153149	0.296903	0.537499	0.2672	0.144947	0.581594	-0.204692	0.66319	0.928908	0.050706	0.400759	0.781715	-0.376265	0.775779	0.958415
NM_000244	MEN1	0.143569	0.0762092	0.350599	-0.265169	0.519019	0.730689	2.06123	0.00291114	0.0250703	0.334808	0.15437	0.392864	0.971662	0.0286445	0.138469	0.308712	0.112064	0.531307	-0.240861	0.69894	0.939563	0.238012	0.171595	0.599329	0.268412	0.159308	0.591762
NM_000247	MICA	NA	NA	NA	NA	NA	NA	NA	NA	NA	NA	NA	NA	NA	NA	NA	0.265238	0.146752	0.584861	0.473792	0.0504146	0.441523	0.53603	0.0183001	0.270768	0.330156	0.120013	0.540779
NM_000249	MLH1	-0.781488	0.268495	0.409664	1.53556	0.00958179	0.0804452	-3.97415	0.517398	0.70265	0.321476	0.158677	0.399206	-1.00884	0.759438	0.878921	0.325686	0.100189	0.511399	-0.105636	0.555275	0.891522	0.0464491	0.406931	0.785452	0.321835	0.124995	0.547785
NM_000250	MPO	-0.559739	0.213083	0.372242	0.287184	0.265652	0.511711	-1.50499	0.165714	0.347664	0.752073	0.056622	0.21734	-1.06582	0.777019	0.888185	-0.656857	0.97469	0.999859	-0.379665	0.813511	0.970652	-0.689363	0.975642	0.998435	-0.51307	0.862096	0.982614
NM_000251	MSH2	-0.305177	0.155104	0.350599	-0.132137	0.457204	0.68456	4.39812	2.51e-05	0.00108527	0.466972	0.115307	0.331605	0.636265	0.078224	0.250107	-0.334269	0.853686	0.978225	-0.448657	0.857173	0.980715	-0.149047	0.671757	0.912255	-0.288734	0.704255	0.932782
NM_000252	MTM1	0.0166938	0.0950766	0.350599	2.2401	0.000494015	0.0149096	0.377036	0.0305122	0.118102	0.752709	0.0565344	0.2172	-0.342041	0.477864	0.692746	0.222987	0.186132	0.629147	-0.117749	0.569031	0.897944	0.0701005	0.373836	0.765146	-0.108564	0.524637	0.863876
NM_000253	MTTP	0.392689	0.046744	0.350599	1.16081	0.035136	0.171327	-0.977207	0.112376	0.271297	1.22533	0.0140653	0.0937114	1.11393	0.0178846	0.104048	0.528061	0.0204701	0.295497	0.526654	0.0354203	0.395643	0.0984287	0.335158	0.74065	0.417613	0.0772402	0.458644
NM_000254	MTR	-0.611615	0.225749	0.379674	0.462062	0.19665	0.436394	-4.80416	0.634287	0.790365	0.95209	0.0326835	0.156053	0.943546	0.031279	0.145175	0.293336	0.123642	0.549892	0.373294	0.0922963	0.539639	0.281443	0.132846	0.545854	-0.0241853	0.432451	0.816546
NM_000255	MMUT	0.0265909	0.0934972	0.350599	0.9544	0.063709	0.239251	2.05635	0.00292939	0.0251004	0.481162	0.111638	0.326088	1.81664	0.00108296	0.0195577	-0.164596	0.691874	0.928977	0.0601725	0.362511	0.802555	0.313016	0.108307	0.505525	-0.102229	0.517853	0.860997
NM_000256	MYBPC3	0.150187	0.0752984	0.350599	1.47179	0.0122242	0.0922015	3.36498	0.000262368	0.00507689	-0.611413	0.60413	0.821087	-0.641955	0.622057	0.79646	-0.236076	0.770738	0.955868	0.301056	0.135948	0.608561	0.40335	0.0570259	0.413106	0.132417	0.271332	0.705696
NM_000257	MYH7	-0.158384	0.125754	0.350599	1.41244	0.0151904	0.104629	4.53006	2.05e-05	0.000924116	1.48183	0.00614418	0.0565811	-0.965293	0.745753	0.871854	-0.560276	0.955734	0.999269	0.0976816	0.32068	0.77984	0.0447892	0.409253	0.787023	-0.215733	0.636021	0.910594
NM_000258	MYL3	0.534046	0.0344715	0.350599	1.49531	0.0111143	0.0869853	3.78194	0.000114073	0.00297262	0.250598	0.183408	0.433896	0.4752	0.118253	0.32062	0.287004	0.128616	0.558264	0.685521	0.0106205	0.249523	0.859733	0.000511848	0.0688769	0.303925	0.135877	0.562877
NM_000259	MYO5A	-1.1628	0.368368	0.482394	0.44824	0.201777	0.442138	-4.23039	0.55504	0.732299	-0.849641	0.715059	0.887565	-0.0194192	0.313447	0.552983	-0.00484541	0.478499	0.837218	-0.228666	0.687275	0.935898	-0.249299	0.779012	0.949321	0.235304	0.183263	0.623178
NM_000261	MYOC	0.32623	0.0535732	0.350599	1.0842	0.0442448	0.194826	-0.506469	0.0755003	0.210484	0.370512	0.142876	0.374691	0.356675	0.155219	0.372468	0.304323	0.115322	0.539115	0.427209	0.0673379	0.488596	0.369319	0.0732886	0.445113	0.390588	0.0889166	0.480849
NM_000262	NAGA	0.165605	0.0732167	0.350599	0.088206	0.354287	0.596593	4.48784	2.05e-05	0.000924116	-0.903277	0.737293	0.899981	0.211805	0.210089	0.443748	-0.141061	0.66362	0.917593	0.0168171	0.412263	0.828108	0.594773	0.0103514	0.223546	0.19189	0.218145	0.662503
NM_000263	NAGLU	0.0239939	0.0939118	0.350599	-0.582657	0.653809	0.822996	1.08242	0.0126119	0.0663648	-0.290289	0.435263	0.696781	-0.113501	0.360824	0.597202	0.53872	0.0186937	0.28598	0.515212	0.0383931	0.40342	0.37142	0.0722006	0.443616	0.454575	0.063129	0.426462
NM_000264	PTCH1	-0.358388	0.16662	0.351141	0.843908	0.0853217	0.280877	-0.958617	0.110623	0.268494	-0.552267	0.574191	0.800718	-0.766574	0.674379	0.830193	0.119203	0.307191	0.733414	0.508497	0.0401976	0.408607	0.633016	0.0070635	0.196896	1.31166	9.23e-05	0.0280852
NM_000265	NCF1	0.266756	0.0603848	0.350599	0.30008	0.260125	0.506031	2.18996	0.00232481	0.0213587	0.947313	0.0331715	0.157684	0.395779	0.14227	0.355506	0.208715	0.200998	0.645725	0.440484	0.062125	0.473167	0.318626	0.104537	0.50003	0.0992004	0.303545	0.734034
NM_000266	NDP	-0.321219	0.158543	0.350599	0.487044	0.187499	0.425773	-1.96038	0.220578	0.416356	-0.656023	0.626087	0.834975	0.844486	0.0428939	0.1761	0.119659	0.306605	0.733282	-0.113782	0.564503	0.895859	0.268521	0.143616	0.564358	-0.0858117	0.499769	0.85242
NM_000269	NME1	-0.060846	0.10803	0.350599	0.206446	0.300527	0.548148	-0.10497	0.0513055	0.164339	-0.358612	0.471786	0.725497	1.89188	0.000749413	0.0156144	0.0893376	0.346864	0.763179	0.0145477	0.415005	0.829556	0.00786206	0.461522	0.816268	-0.355132	0.759538	0.954192
NM_000270	PNP	-0.097336	0.114484	0.350599	0.9994	0.0565532	0.224563	-1.57556	0.17374	0.358646	-0.504234	0.549566	0.783103	0.750163	0.0570377	0.208598	-0.253879	0.787858	0.961882	-0.175965	0.633278	0.918313	-0.0416987	0.531571	0.855544	0.082199	0.320629	0.745777
NM_000271	NPC1	0.121526	0.07925	0.350599	-0.639236	0.675178	0.835262	2.44938	0.00156736	0.0168134	0.129179	0.23127	0.494175	-1.45322	0.865834	0.93699	0.201581	0.208702	0.652554	0.372829	0.0925693	0.54008	0.200905	0.209868	0.640035	0.0899837	0.312799	0.741152
NM_000272	NPHP1	-0.488478	0.196044	0.36378	-0.497561	0.619863	0.800766	-0.494248	0.0746836	0.209038	-1.58757	0.921087	0.982936	0.625463	0.0805313	0.254423	0.512529	0.0235132	0.313628	0.491962	0.0448504	0.422761	0.0321916	0.427038	0.796846	0.774494	0.00780833	0.1836
NM_000273	GPR143	-0.308469	0.155808	0.350599	1.50623	0.0106854	0.0853102	-3.95298	0.514252	0.700333	-0.951809	0.756177	0.910916	2.16468	0.000215324	0.00708186	0.163341	0.252354	0.693516	0.415594	0.0722316	0.499697	0.120514	0.305896	0.716439	-0.274399	0.691487	0.929572
NM_000274	OAT	0.231582	0.0646194	0.350599	1.55232	0.0090163	0.0777909	-1.08023	0.121878	0.286285	1.90193	0.00157254	0.0246213	-1.44769	0.864831	0.936595	0.101761	0.329961	0.751292	0.647694	0.0145407	0.289168	0.181525	0.231548	0.659845	0.683541	0.0150446	0.245239
NM_000275	OCA2	-2.72283	0.711255	0.743381	0.147773	0.326685	0.571272	-6.86227	0.843658	0.930298	-3.34592	0.997783	0.999741	-0.830908	0.698763	0.844113	-0.0358844	0.522707	0.856609	-0.458786	0.862885	0.981734	-0.27003	0.79775	0.954776	-0.606312	0.903496	0.989816
NM_000276	OCRL	0.0905309	0.0837097	0.350599	-0.0413734	0.41455	0.649771	0.731051	0.019892	0.0896542	0.157358	0.219643	0.481202	-0.479816	0.546776	0.744411	0.00671327	0.462254	0.82824	0.0662334	0.355726	0.798827	0.0260783	0.435649	0.801719	0.263099	0.163088	0.596647
NM_000277	PAH	-0.508053	0.200677	0.366043	-0.565416	0.64691	0.818447	-1.14356	0.127796	0.2946	-0.537259	0.566608	0.795861	0.214021	0.209291	0.442956	-0.439447	0.914685	0.994502	-0.441964	0.853435	0.980297	-0.279885	0.806212	0.957566	-0.491216	0.850407	0.980166
NM_000278	PAX2	-0.569581	0.215448	0.373378	0.0553688	0.369605	0.610851	-2.43835	0.285588	0.488659	-0.690074	0.642438	0.845334	0.794728	0.0500566	0.193444	-0.275928	0.807798	0.967431	-0.326992	0.774427	0.960822	0.107564	0.322988	0.731055	-0.883433	0.970208	0.999171
NM_000281	PCBD1	-1.5249	0.460434	0.549442	-1.49154	0.884424	0.949571	-2.3433	0.271968	0.473262	-1.43136	0.893764	0.973408	-0.833399	0.699663	0.844712	-0.238929	0.77362	0.957267	-0.583141	0.91829	0.991541	-0.058861	0.554807	0.866279	-0.129655	0.547424	0.874582
NM_000285	PEPD	0.297529	0.0567667	0.350599	-0.000104696	0.395256	0.633068	0.428042	0.0288057	0.114118	0.154289	0.220892	0.482694	0.607891	0.0845676	0.262957	0.352164	0.083944	0.478294	0.450661	0.0584617	0.464502	0.465103	0.0345387	0.341145	0.273205	0.155986	0.586585
NM_000286	PEX12	-0.151417	0.124436	0.350599	0.373937	0.229641	0.473558	2.68819	0.00100384	0.0123927	2.00976	0.00109285	0.0196595	2.51801	3.38e-05	0.00210933	0.0141456	0.451606	0.82371	-0.567739	0.9127	0.99053	-0.132199	0.651018	0.904192	0.0801228	0.322687	0.746683
NM_000287	PEX6	0.294384	0.0571286	0.350599	-0.900708	0.761033	0.885081	0.869815	0.0165931	0.079625	-0.177071	0.376422	0.646001	1.3855	0.00643651	0.0569378	0.495754	0.0273531	0.330007	0.0361424	0.389635	0.816977	0.0448387	0.409205	0.787023	0.93229	0.00233045	0.112801
NM_000288	PEX7	0.0902344	0.0837544	0.350599	-0.124189	0.453518	0.681251	3.81615	0.00010951	0.00292618	0.550818	0.0944319	0.294298	0.29578	0.177201	0.402335	0.0615887	0.38477	0.786623	0.150024	0.265443	0.743503	0.441939	0.0419795	0.36833	-0.292613	0.707525	0.934186
NM_000289	PFKM	0.479084	0.0388886	0.350599	1.02072	0.0531981	0.216146	3.03416	0.000522454	0.00806792	1.52477	0.00539545	0.0522597	0.79149	0.0505527	0.194626	0.793515	0.00127662	0.104967	0.250052	0.173697	0.654511	0.541972	0.0173406	0.265344	0.330797	0.119652	0.540558
NM_000290	PGAM2	-0.634942	0.231493	0.383039	-0.0342476	0.411201	0.647134	-3.35937	0.424078	0.621973	1.3426	0.00966468	0.0745524	-0.488749	0.551146	0.747402	-0.0478829	0.539755	0.863838	-0.228463	0.687105	0.935898	-0.269458	0.79723	0.954714	0.263732	0.162592	0.595343
NM_000291	PGK1	-1.11312	0.355365	0.472687	-1.12846	0.819165	0.916626	-4.23769	0.556099	0.733127	0.692173	0.0665328	0.239745	0.221503	0.206184	0.438797	0.360749	0.0789761	0.467725	0.75064	0.0061302	0.202115	0.158043	0.258624	0.679195	0.37626	0.0957273	0.494868
NM_000292	PHKA2	0.254227	0.0618765	0.350599	0.654227	0.133033	0.35496	-0.922767	0.107473	0.263764	1.09931	0.0210833	0.119403	0.186138	0.220568	0.457289	0.550917	0.0168209	0.277974	0.859523	0.00241876	0.149936	0.149207	0.269537	0.690505	0.420477	0.0760459	0.456179
NM_000293	PHKB	0.105484	0.0815437	0.350599	-0.208701	0.493191	0.712031	0.830653	0.0175079	0.0824749	-0.203615	0.390032	0.657655	0.00359892	0.302469	0.542662	0.276891	0.136759	0.571537	0.179119	0.236599	0.715932	0.7282	0.00244483	0.130097	0.0863543	0.316494	0.743293
NM_000294	PHKG2	-0.403343	0.176465	0.353652	0.401112	0.21941	0.462853	-1.92557	0.216248	0.411137	-0.187604	0.381847	0.650474	0.0986955	0.258383	0.498019	-0.330215	0.850814	0.977415	0.342405	0.109603	0.569013	0.3166	0.10585	0.501958	-0.141864	0.560481	0.880444
NM_000295	SERPINA1	-0.239153	0.14156	0.350599	1.79442	0.00341396	0.0446075	-2.6647	0.318088	0.522158	0.726054	0.0607765	0.227488	0.716862	0.0627987	0.221146	-0.128304	0.64768	0.912591	-0.376303	0.81115	0.970048	0.0270332	0.43432	0.801225	-0.47904	0.843366	0.978069
NM_000296	PKD1	-2.67437	0.702909	0.736691	-0.62591	0.670109	0.832158	-8.50975	0.927114	0.974529	-1.17699	0.832257	0.946509	-0.38482	0.499291	0.70881	0.394922	0.0614265	0.430261	0.272217	0.156515	0.637485	0.0390962	0.41723	0.792347	0.409649	0.0805924	0.465368
NM_000297	PKD2	-0.504722	0.199851	0.365668	0.0564388	0.369105	0.610713	-0.962471	0.111009	0.269059	-1.31347	0.868394	0.963564	0.200616	0.214699	0.450144	0.725198	0.00269978	0.137747	0.055374	0.368113	0.806665	0.413366	0.0527986	0.401679	1.26048	0.00014051	0.0350905
NM_000298	PKLR	-0.768665	0.265186	0.407189	0.341376	0.242868	0.487599	-2.74625	0.33033	0.534537	0.944175	0.0335156	0.158669	-1.61396	0.891103	0.949994	0.425124	0.0487927	0.395493	0.432744	0.0650777	0.480987	-0.0679353	0.567358	0.873178	-0.0265963	0.434978	0.817814
NM_000299	PKP1	-1.92138	0.553285	0.617972	0.184835	0.310132	0.557064	-4.73439	0.625013	0.784076	-1.90325	0.957737	0.99177	-1.23273	0.820675	0.91268	-0.585269	0.961735	0.999859	-0.567291	0.912553	0.99053	-0.0159606	0.495583	0.837242	-0.750678	0.946709	0.997236
NM_000301	PLG	0.213373	0.0669245	0.350599	-1.18792	0.83193	0.923556	1.68927	0.0052177	0.036908	2.22742	0.000544342	0.0131481	-1.17898	0.807559	0.905848	0.104261	0.326599	0.749667	0.481937	0.0478874	0.433922	-0.219927	0.750449	0.940738	0.487219	0.0524443	0.400335
NM_000302	PLOD1	0.326574	0.0535473	0.350599	1.19814	0.0312911	0.160082	4.70427	1.37e-05	0.000800249	0.638914	0.0761161	0.260053	0.921003	0.0336349	0.151977	0.117631	0.309206	0.73439	-0.0449612	0.484326	0.859737	0.381168	0.0671946	0.435154	0.852458	0.00431967	0.143068
NM_000303	PMM2	-0.461657	0.189722	0.360175	1.66664	0.00579364	0.0600438	2.82071	0.000807636	0.0109425	1.55471	0.00491576	0.049301	1.1636	0.0150727	0.0948485	-0.195186	0.727443	0.942217	-0.528738	0.897268	0.988199	-0.591724	0.958853	0.996692	-0.53098	0.871297	0.984391
NM_000304	PMP22	-0.23988	0.141696	0.350599	0.578667	0.156367	0.387155	-0.966751	0.111379	0.26946	-0.0184544	0.297866	0.570018	-0.0572732	0.332355	0.570445	-0.14114	0.663714	0.917593	-0.289526	0.743071	0.953988	-0.240251	0.770453	0.947644	-0.288602	0.704163	0.932782
NM_000305	PON2	-0.0584101	0.107581	0.350599	1.31549	0.021167	0.128168	-1.96727	0.221427	0.417236	-0.425708	0.507994	0.75306	0.843847	0.0429551	0.1761	0.0834984	0.354675	0.769375	0.22543	0.194464	0.678381	0.206055	0.204336	0.635275	0.38501	0.0916445	0.48748
NM_000307	POU3F4	0.110735	0.0807711	0.350599	1.58457	0.00806821	0.0733381	0.728786	0.0199605	0.0898023	1.61445	0.00404607	0.0435765	0.985206	0.0274349	0.134692	-0.0760165	0.578897	0.883659	0.112578	0.304684	0.769404	-0.150886	0.673933	0.913045	0.557267	0.0345774	0.341872
NM_000309	PPOX	-0.495785	0.197737	0.36505	-0.434747	0.593674	0.783063	-4.34587	0.571661	0.744625	2.27603	0.000481774	0.0124542	0.521447	0.105891	0.301775	0.303682	0.115747	0.539787	-0.151391	0.606643	0.909658	0.0903655	0.345975	0.748599	0.0105254	0.395316	0.79679
NM_000310	PPT1	-0.0480738	0.105763	0.350599	-0.593963	0.65806	0.82496	-0.473117	0.0732736	0.206399	1.6673	0.00341621	0.0387929	0.062687	0.274775	0.514915	-0.0951486	0.60461	0.894987	-0.0904226	0.538025	0.884114	0.11479	0.313255	0.721104	-0.121514	0.538646	0.869231
NM_000311	PRNP	0.459314	0.0405562	0.350599	1.9705	0.00163761	0.0284065	-1.168	0.130178	0.298317	0.899948	0.0379663	0.171644	0.134809	0.242641	0.481807	0.747088	0.00211165	0.125977	0.819339	0.00343243	0.165904	0.374697	0.0704684	0.441106	0.603399	0.0256511	0.300678
NM_000312	PROC	-0.167945	0.127589	0.350599	0.570547	0.159039	0.390679	2.87165	0.000730067	0.0101466	-0.433	0.511988	0.756426	-0.00167264	0.304994	0.545167	-0.332368	0.852315	0.977781	0.201246	0.215854	0.699322	0.313307	0.108106	0.505085	-0.853967	0.96592	0.998589
NM_000313	PROS1	-1.79622	0.524951	0.596303	-0.624339	0.669514	0.831912	-4.15371	0.54398	0.723408	0.0612881	0.260608	0.529344	-2.46813	0.95962	0.981382	0.0923867	0.342719	0.761577	0.413198	0.0732353	0.500776	0.331414	0.0957577	0.485209	0.207293	0.20515	0.647577
NM_000315	PTH	0.12653	0.0785376	0.350599	3.20995	2.1e-06	0.000397831	2.17542	0.002375	0.0216781	1.01657	0.0270315	0.138735	-0.318865	0.465994	0.68423	0.290051	0.126215	0.553824	0.163032	0.252242	0.730952	0.0862265	0.351567	0.750334	-0.0331897	0.44207	0.82155
NM_000316	PTH1R	-0.614012	0.226362	0.380067	1.586	0.00801986	0.0730136	0.277603	0.0341306	0.127058	0.346231	0.150691	0.386914	1.89135	0.000753635	0.0156598	-0.489971	0.934653	0.996348	-0.530211	0.89794	0.988242	-0.660572	0.971593	0.998135	-0.775294	0.952062	0.997569
NM_000317	PTS	0.316381	0.0546415	0.350599	0.501868	0.182342	0.419983	1.59659	0.0060413	0.0404793	0.103023	0.242259	0.508286	1.68631	0.00192525	0.027938	0.0383587	0.417404	0.804077	0.550814	0.0298341	0.372005	0.440273	0.0425717	0.370395	0.236079	0.182713	0.622609
NM_000318	PEX2	-0.602206	0.223458	0.378375	0.0708656	0.362441	0.604496	-3.36403	0.424748	0.622585	1.88762	0.00164137	0.0252053	-1.00328	0.757703	0.878328	0.143293	0.276441	0.710546	0.121258	0.295376	0.762281	0.519707	0.0213812	0.287078	0.330336	0.119911	0.540684
NM_000319	PEX5	-1.46739	0.446166	0.538614	0.0378049	0.37768	0.618385	-7.5025	0.883204	0.952243	1.08535	0.0220094	0.122123	0.509805	0.108713	0.305847	0.274631	0.138606	0.573396	0.490369	0.0453242	0.425699	0.346992	0.0860025	0.469097	0.7412	0.00987984	0.205433
NM_000320	QDPR	-0.690788	0.245516	0.39305	-0.396467	0.577142	0.771394	-1.41791	0.15589	0.334647	1.04625	0.0246341	0.130713	-1.99503	0.931402	0.968912	-0.0987254	0.609554	0.897738	0.0295212	0.397347	0.821244	0.244362	0.165255	0.591263	1.04662	0.000877182	0.0765116
NM_000321	RB1	NA	NA	NA	-0.822338	0.737476	0.872769	NA	NA	NA	2.71245	0.000110537	0.00483609	-0.6377	0.620233	0.795439	-0.0689257	0.569039	0.879508	-0.0571846	0.49849	0.866988	-0.434352	0.906442	0.985532	-0.356928	0.760997	0.954608
NM_000322	PRPH2	-2.34924	0.642684	0.687837	-2.27372	0.953348	0.981622	-5.67615	0.738839	0.863581	1.19347	0.0156191	0.0993349	-2.64056	0.966186	0.984427	0.111142	0.317729	0.742352	0.633428	0.0162208	0.301584	-0.18298	0.710762	0.926439	0.129304	0.274319	0.708957
NM_000324	RHAG	-2.67092	0.702309	0.736272	-1.594	0.897909	0.954546	-6.98123	0.851662	0.934971	0.744731	0.0577482	0.219555	-2.85316	0.972628	0.987593	0.418391	0.0514483	0.404114	0.492507	0.0446899	0.422365	0.502013	0.0249822	0.302415	0.322057	0.124869	0.547785
NM_000325	PITX2	-0.878122	0.29358	0.428129	-1.02543	0.794406	0.903064	-0.528927	0.0769308	0.212819	-0.956996	0.75821	0.911887	-1.00113	0.757078	0.878121	0.243075	0.166704	0.608282	0.0557981	0.367603	0.806267	0.0373355	0.419757	0.793546	0.216088	0.198105	0.638404
NM_000326	RLBP1	-0.120543	0.118728	0.350599	1.77274	0.00376082	0.0470113	-8.26078	0.918219	0.969784	3.56445	1.04e-05	0.00103335	2.80299	1.06e-05	0.00111574	0.000711153	0.470705	0.833394	-0.404593	0.83036	0.974772	0.0332611	0.425474	0.796249	-0.111553	0.527941	0.865014
NM_000327	ROM1	NA	NA	NA	NA	NA	NA	NA	NA	NA	NA	NA	NA	NA	NA	NA	0.463484	0.0360727	0.35959	-0.256691	0.713691	0.945035	0.242143	0.167428	0.593655	0.17214	0.235358	0.677048
NM_000328	RPGR	0.181016	0.0711424	0.350599	0.454627	0.199513	0.439663	5.61931	2.28e-06	0.000329514	0.995109	0.0287792	0.143977	0.822413	0.0459147	0.183453	0.191168	0.220212	0.664951	0.246935	0.176268	0.655742	-0.0931647	0.601066	0.886228	0.379125	0.0944165	0.492228
NM_000329	RPE65	0.32653	0.0535499	0.350599	-0.536766	0.635858	0.811223	3.60613	0.000155139	0.00358231	0.916464	0.0362269	0.166309	-0.15945	0.384333	0.617988	0.127509	0.296388	0.72545	0.248005	0.175379	0.655364	0.494109	0.0268369	0.311533	0.436497	0.0697591	0.444305
NM_000330	RS1	0.151952	0.0750506	0.350599	1.65339	0.00611948	0.0618476	-0.136525	0.0529321	0.16753	-0.759136	0.674859	0.864879	-0.149916	0.379458	0.613674	0.287828	0.127955	0.556626	0.247856	0.175486	0.655364	0.253224	0.156983	0.582352	0.0398563	0.364207	0.776948
NM_000333	ATXN7	-2.78268	0.721435	0.751912	-1.20202	0.834715	0.925333	-10.7588	0.970902	0.991024	-0.391217	0.489278	0.738055	1.22134	0.0121933	0.0833032	0.328281	0.0984345	0.508129	-0.431653	0.847431	0.979409	-0.464611	0.919648	0.989611	0.194894	0.215588	0.659978
NM_000334	SCN4A	-0.730118	0.255342	0.400494	0.587333	0.153517	0.38365	-3.72318	0.479709	0.670139	-0.138689	0.356798	0.626871	0.354068	0.156135	0.373589	-0.0902157	0.597986	0.89254	-0.242987	0.701017	0.940641	0.2263	0.183201	0.615029	-0.188628	0.608851	0.899327
NM_000336	SCNN1B	-2.15777	0.603995	0.657116	-2.46184	0.961641	0.984846	-2.61579	0.311232	0.515764	-2.21172	0.977413	0.997613	-1.34171	0.844715	0.927199	0.141363	0.278774	0.712475	1.19256	8.23e-05	0.0309924	0.961618	0.000144522	0.0451798	0.0373441	0.366881	0.778632
NM_000339	SLC12A3	0.0434586	0.0908416	0.350599	1.21375	0.0297376	0.15502	0.405628	0.02957	0.116125	-0.781761	0.685218	0.871337	0.121656	0.24851	0.48791	0.130246	0.292899	0.724036	0.157839	0.257487	0.736086	-0.0838822	0.588735	0.880708	-0.0303682	0.439083	0.819861
NM_000340	SLC2A2	-0.221486	0.138045	0.350599	-0.300666	0.534915	0.7419	-0.202708	0.0565528	0.17454	-0.323923	0.453159	0.711071	-0.0586461	0.333018	0.570998	0.262404	0.149198	0.589955	0.307043	0.131771	0.603224	0.0310152	0.428643	0.797863	0.404332	0.0828084	0.469067
NM_000341	SLC3A1	-0.510177	0.201153	0.366179	0.558309	0.16313	0.396041	-0.701739	0.0895769	0.234423	1.82066	0.00204806	0.0287472	2.8875	6.33e-06	0.000748406	-0.576476	0.959714	0.999859	-0.556145	0.908348	0.990022	-0.164583	0.68964	0.918216	-0.743505	0.945029	0.997236
NM_000342	SLC4A1	-0.211333	0.135988	0.350599	0.621132	0.143075	0.369086	-2.07667	0.236017	0.433594	0.177578	0.211478	0.470863	0.432627	0.130748	0.339527	0.111024	0.317881	0.742352	0.700692	0.00936592	0.23796	-0.0483776	0.540527	0.858482	0.524102	0.0422071	0.368149
NM_000343	SLC5A1	0.413429	0.0447294	0.350599	-0.377941	0.569202	0.76621	2.58926	0.00122971	0.0142571	0.0152782	0.281683	0.552455	0.648236	0.0758089	0.246082	0.106871	0.323213	0.746231	0.824145	0.00328992	0.164578	0.122847	0.30293	0.714608	0.599852	0.0262091	0.303996
NM_000344	SMN2	-1.38695	0.425854	0.523933	0.991665	0.0576862	0.226777	-4.37743	0.575973	0.747876	-1.24766	0.851845	0.955189	-0.914382	0.728596	0.860793	0.0371698	0.419082	0.80447	0.34595	0.107538	0.566962	-0.301087	0.823641	0.962919	0.170752	0.236506	0.67744
NM_000345	SNCA	-0.347707	0.164254	0.350923	0.251981	0.280775	0.528582	-3.08339	0.381451	0.582745	-0.0305155	0.303493	0.575232	1.47109	0.00456614	0.0463126	0.0887948	0.347557	0.763353	-0.20933	0.668048	0.930127	-0.0447759	0.535752	0.856229	0.392574	0.0880575	0.479133
NM_000346	SOX9	-0.735641	0.256745	0.401368	0.108692	0.344717	0.58841	-4.81828	0.636205	0.791427	1.43355	0.00724955	0.0628656	0.333477	0.16318	0.383042	0.50729	0.0246392	0.317544	0.42939	0.0664728	0.486599	0.767808	0.00153554	0.108531	0.355419	0.106418	0.514543
NM_000348	SRD5A2	-0.800247	0.273315	0.412922	1.32721	0.0203471	0.125006	-4.13338	0.541064	0.72079	-0.858517	0.718848	0.889627	0.463701	0.121475	0.32566	0.421184	0.0502781	0.399819	0.363073	0.0978083	0.549286	0.69752	0.00346651	0.146863	0.383658	0.0922768	0.488729
NM_000349	STAR	-1.23517	0.38708	0.495451	0.718922	0.115082	0.330035	-5.04821	0.665543	0.812076	-0.50554	0.550242	0.783531	-0.105859	0.356814	0.593547	-0.119972	0.637354	0.908947	-0.193842	0.651747	0.925366	-0.127594	0.645384	0.901863	0.168246	0.238654	0.679903
NM_000350	ABCA4	-1.45833	0.443945	0.537053	-0.788769	0.726848	0.867309	-4.67401	0.616815	0.777502	-0.372195	0.479042	0.730384	0.00167163	0.303356	0.543752	0.000205658	0.471359	0.833793	0.0218985	0.406308	0.824566	0.0891412	0.347665	0.749023	-0.0967302	0.511921	0.858124
NM_000351	STS	0.455657	0.0408717	0.350599	1.62594	0.00686155	0.0670417	-0.69755	0.0892666	0.233942	0.261035	0.179591	0.428487	0.633206	0.0788383	0.250946	0.215676	0.193744	0.636644	0.497965	0.0431483	0.417663	0.490863	0.0276438	0.315767	0.628408	0.0217469	0.283464
NM_000353	TAT	-0.882272	0.294655	0.429005	0.374757	0.229343	0.473069	-3.97112	0.516938	0.702323	-0.743717	0.667695	0.85993	0.810997	0.0475909	0.187628	-0.193802	0.725903	0.941456	-0.156176	0.612011	0.912115	-0.360292	0.865904	0.975571	-0.483697	0.846049	0.978766
NM_000354	SERPINA7	-0.28064	0.149993	0.350599	1.42361	0.0145598	0.101989	2.04281	0.00297959	0.0252658	0.539737	0.0969721	0.298895	-0.286934	0.4498	0.671756	-0.0318098	0.517145	0.854637	-0.3411	0.78532	0.963919	-0.468526	0.921155	0.989693	-0.281125	0.697561	0.931638
NM_000355	TCN2	-0.333498	0.161202	0.350638	0.651017	0.133886	0.355528	-1.59396	0.175887	0.361298	0.736318	0.059156	0.223587	-0.353656	0.483732	0.697297	-0.239496	0.774164	0.957514	-0.329427	0.776348	0.961469	-0.0895586	0.596405	0.884432	-0.675513	0.927248	0.995475
NM_000358	TGFBI	NA	NA	NA	-0.270725	0.521587	0.732061	NA	NA	NA	-0.340934	0.462317	0.717791	-1.99088	0.931048	0.968912	-0.276005	0.807884	0.967431	0.0569394	0.366299	0.80478	0.179448	0.233888	0.66148	0.298843	0.138998	0.566297
NM_000359	TGM1	0.0450081	0.0905968	0.350599	-0.311561	0.539809	0.745405	0.0377576	0.0442991	0.150188	0.250102	0.183608	0.434095	0.636948	0.0781163	0.250099	-0.0794762	0.583511	0.885742	-0.0590162	0.500778	0.868007	0.123182	0.302472	0.714087	0.195342	0.215229	0.659729
NM_000361	THBD	-0.977764	0.319766	0.446978	-0.0939607	0.439377	0.671006	-1.29907	0.143134	0.316615	-1.35481	0.877825	0.967489	-1.16322	0.80365	0.903645	-0.187383	0.718452	0.938542	0.198452	0.218507	0.703023	-0.0463456	0.537816	0.857284	-0.414143	0.802726	0.965059
NM_000362	TIMP3	-1.23645	0.387408	0.495519	-0.28395	0.527604	0.736343	-6.34431	0.802932	0.905173	-0.754826	0.672871	0.863432	2.43727	5.91e-05	0.00322772	-0.135709	0.657056	0.915456	-0.101368	0.550351	0.889387	-0.221014	0.751537	0.941058	-0.29989	0.713776	0.936685
NM_000363	TNNI3	NA	NA	NA	0.191519	0.307111	0.554247	NA	NA	NA	2.06015	0.000905151	0.0175051	1.00389	0.0258537	0.12965	0.107408	0.322554	0.745701	-0.260213	0.717015	0.946327	0.386734	0.0645952	0.430415	-0.0442898	0.454168	0.828729
NM_000364	TNNT2	-0.608549	0.225009	0.379516	0.848954	0.0842895	0.279448	-4.60016	0.606749	0.770306	0.0283863	0.275575	0.545858	1.28862	0.00951227	0.0724631	-0.0542969	0.548663	0.868764	0.0903108	0.328827	0.782786	0.00852348	0.460573	0.815848	0.457517	0.0621916	0.424431
NM_000365	TPI1	-0.850559	0.286371	0.422511	-0.367101	0.56455	0.762404	-1.48002	0.162839	0.344643	-1.33632	0.873731	0.966072	-0.218797	0.414761	0.643037	1.02398	9.03e-05	0.0428602	0.377197	0.0903673	0.537219	0.755076	0.00178444	0.111824	1.09619	0.000604192	0.0688138
NM_000366	TPM1	-1.15904	0.36739	0.481535	0.317692	0.252677	0.49747	-3.98281	0.518715	0.704002	-0.806346	0.696107	0.877702	-0.16471	0.38706	0.619921	-0.295008	0.823886	0.971585	-0.263768	0.720251	0.947551	0.330128	0.0966389	0.486773	0.168367	0.238541	0.679903
NM_000367	TPMT	-0.321248	0.158548	0.350599	-0.691699	0.694013	0.847663	3.47678	0.00020305	0.00428967	-1.84258	0.952062	0.990773	-0.384895	0.499341	0.70881	-0.38177	0.88456	0.986888	-0.118662	0.570033	0.89811	-0.176428	0.703301	0.923552	-0.608133	0.904182	0.99011
NM_000368	TSC1	-0.294827	0.152942	0.350599	2.03149	0.00122768	0.0240413	-0.68813	0.0884681	0.232458	0.421348	0.127557	0.351492	-0.964997	0.745653	0.871783	-0.171203	0.699815	0.931973	-0.345068	0.788335	0.964881	-0.163747	0.688678	0.918121	-0.499291	0.854769	0.98172
NM_000369	TSHR	-0.76271	0.263642	0.405984	-0.603233	0.661673	0.827289	-1.19703	0.132977	0.302157	-0.049013	0.312321	0.583899	-1.20156	0.813276	0.909102	-0.331624	0.851761	0.97765	-0.341204	0.785427	0.963919	-0.258218	0.78718	0.95137	-0.587876	0.896167	0.987853
NM_000370	TTPA	-2.83867	0.730692	0.759882	-0.5214	0.629541	0.806819	-11.0694	0.974092	0.99188	0.256544	0.181285	0.430965	-0.0204497	0.313985	0.553467	0.380777	0.068462	0.446133	0.104882	0.312847	0.774317	0.0324713	0.42663	0.796553	0.0286158	0.376408	0.785782
NM_000371	TTR	-0.108503	0.116535	0.350599	0.395116	0.221626	0.465105	-0.614986	0.082947	0.223042	2.74721	9.8e-05	0.00443073	0.643739	0.0766534	0.24736	-0.134879	0.656086	0.91525	-0.392309	0.822236	0.972654	0.0513775	0.399775	0.781027	0.0417991	0.362043	0.776049
NM_000372	TYR	-1.47745	0.448674	0.540414	0.263233	0.275852	0.523454	-6.10794	0.781654	0.890977	0.774228	0.053454	0.210726	-0.839326	0.701839	0.846291	-0.192874	0.724922	0.941065	0.216736	0.20213	0.685767	0.209511	0.200608	0.631316	0.210285	0.20277	0.644349
NM_000373	UMPS	-0.617987	0.227328	0.380472	0.456701	0.19876	0.438977	-1.52794	0.168246	0.351342	-0.634736	0.615507	0.828344	-0.765968	0.674172	0.830027	0.201948	0.208304	0.652236	-0.0584287	0.500015	0.867548	0.189121	0.222859	0.651909	-0.168832	0.58826	0.891161
NM_000374	UROD	0.153039	0.0748948	0.350599	0.61287	0.145558	0.372783	2.42459	0.0016244	0.0172411	0.941903	0.0337263	0.159173	1.61329	0.00256278	0.0326009	0.462126	0.0364761	0.360443	-0.0689614	0.512743	0.873243	0.0171042	0.448336	0.808642	0.201885	0.209745	0.653989
NM_000375	UROS	-3.0648	0.766305	0.789914	-0.209606	0.493593	0.712411	-10.1864	0.963825	0.989226	-1.35488	0.87784	0.967489	-0.508362	0.56066	0.753608	0.160482	0.255746	0.696143	0.69938	0.00946829	0.238466	0.455864	0.0372525	0.350897	0.654759	0.0183084	0.263209
NM_000377	WAS	-0.425293	0.181449	0.355914	0.200483	0.303189	0.550685	-4.18818	0.548987	0.727266	0.245988	0.185085	0.436153	2.04054	0.000394761	0.0104682	-0.0667199	0.565924	0.877839	-0.22346	0.682253	0.934047	-0.279629	0.805986	0.957527	-0.305747	0.718834	0.938161
NM_000379	XDH	-0.127618	0.120014	0.350599	-1.08084	0.80803	0.910044	-0.102198	0.0511526	0.164107	-0.218061	0.397603	0.664238	0.890628	0.0372237	0.162029	0.102414	0.329106	0.750953	0.232669	0.188188	0.66924	0.205426	0.20508	0.635846	0.18474	0.224332	0.668345
NM_000380	XPA	0.378207	0.0481462	0.350599	0.304325	0.258404	0.504441	0.406257	0.0295403	0.116089	0.491077	0.109031	0.321615	1.01585	0.0247982	0.126645	0.329934	0.0972944	0.506287	0.555671	0.0287903	0.368221	0.206193	0.204171	0.635275	0.42103	0.0758391	0.45563
NM_000382	ALDH3A2	-0.397934	0.175271	0.353275	0.674476	0.127199	0.347406	1.44415	0.00752425	0.0470756	-0.178758	0.377292	0.646662	0.873716	0.0391341	0.166878	-0.685819	0.978607	0.999859	-0.299953	0.751837	0.955555	0.0139606	0.452744	0.811331	-0.619926	0.908544	0.991121
NM_000383	AIRE	-0.0972895	0.114476	0.350599	0.0911364	0.352964	0.595661	1.08222	0.0126119	0.0663648	-2.33135	0.982289	0.998174	0.768827	0.0539197	0.201742	0.127717	0.296147	0.725385	-0.0312207	0.468409	0.853372	0.165049	0.250129	0.673664	0.243418	0.177361	0.61492
NM_000384	APOB	-0.701901	0.248312	0.394821	0.62341	0.142388	0.368484	-4.04239	0.52766	0.710955	-1.16555	0.82897	0.945203	1.77693	0.0012645	0.021285	0.374287	0.071788	0.452912	-0.285361	0.739358	0.953581	-0.347867	0.857712	0.972763	-0.211193	0.631413	0.908724
NM_000386	BLMH	-0.365204	0.168105	0.351264	0.893679	0.0751933	0.26312	-2.86026	0.34764	0.551727	0.486815	0.110151	0.323437	0.0189551	0.295151	0.535915	0.223536	0.185596	0.628859	-0.129749	0.582688	0.901604	0.312016	0.109052	0.507006	0.142546	0.261886	0.697491
NM_000387	SLC25A20	0.30745	0.0556418	0.350599	0.129875	0.335037	0.579769	1.77371	0.00458117	0.0337449	-0.149946	0.362521	0.632641	-0.523834	0.56803	0.758602	0.465482	0.0354966	0.358059	0.439877	0.0623779	0.47418	0.20909	0.201044	0.631673	0.389959	0.0892177	0.481445
NM_000388	CASR	NA	NA	NA	1.04114	0.0501394	0.209107	NA	NA	NA	-0.527049	0.561377	0.791464	-0.388661	0.501216	0.710421	0.0982181	0.334748	0.755164	0.189412	0.226755	0.710576	0.123773	0.301715	0.713697	0.240424	0.179509	0.61766
NM_000390	CHM	NA	NA	NA	0.83379	0.087613	0.285385	NA	NA	NA	1.3617	0.00914328	0.0721137	NA	NA	NA	0.490289	0.028708	0.334879	0.423148	0.0689457	0.493147	0.120782	0.305549	0.71639	0.747381	0.00949043	0.202119
NM_000391	TPP1	0.167971	0.0728991	0.350599	1.56196	0.0087283	0.0763224	-1.2114	0.134371	0.303934	-0.762454	0.67645	0.86564	1.08378	0.0198331	0.110331	0.750019	0.00204742	0.125842	0.935608	0.0011582	0.109796	0.479548	0.0304961	0.325395	1.42567	4.42e-05	0.0217227
NM_000392	ABCC2	-2.58736	0.687407	0.724207	-0.00346215	0.396795	0.634395	-9.69443	0.95626	0.986482	0.0913044	0.247258	0.514163	-0.742844	0.665014	0.823864	0.191908	0.219332	0.664301	0.546037	0.03091	0.378303	0.364854	0.0755688	0.450018	0.35739	0.105414	0.512848
NM_000393	COL5A2	-6.28857	0.982089	0.983162	-4.74719	0.994515	0.99806	-12.1253	0.983761	0.995307	-2.08298	0.970726	0.99585	-6.19884	0.999031	0.999725	-0.206252	0.739769	0.946109	-0.34636	0.789353	0.965523	0.0246328	0.437656	0.803025	-0.145263	0.564042	0.88242
NM_000394	CRYAA	-1.38979	0.426582	0.524506	-1.22128	0.838602	0.927726	-5.19315	0.683621	0.825365	1.01407	0.0272651	0.13944	-0.158816	0.384052	0.617678	0.242776	0.166971	0.608358	-0.335201	0.780782	0.962988	-0.073884	0.575229	0.8755	0.360398	0.103823	0.510556
NM_000395	CSF2RB	-0.157029	0.125502	0.350599	-0.566978	0.647595	0.818653	2.19526	0.00231112	0.0212974	1.9521	0.00132436	0.0221088	3.07095	4.22e-06	0.000579124	-0.316727	0.840882	0.975018	0.270363	0.157894	0.638162	-0.501639	0.933572	0.992325	-0.0801115	0.493436	0.850042
NM_000396	CTSK	-0.416565	0.179475	0.35511	1.21187	0.0299247	0.155573	3.03985	0.000520173	0.00806085	-0.454282	0.523302	0.764845	-0.282324	0.447402	0.670085	-0.347988	0.863335	0.980442	-0.823564	0.97235	0.999863	-0.149776	0.672614	0.912603	-0.344929	0.751458	0.951333
NM_000397	CYBB	-0.427279	0.181901	0.356148	2.88388	1.68e-05	0.00207638	0.523746	0.0257417	0.105742	1.04408	0.0248041	0.131314	1.4649	0.00468014	0.0468502	-0.47131	0.927829	0.995721	-0.524215	0.89522	0.987878	-0.252943	0.782471	0.950446	-0.460649	0.832508	0.974785
NM_000398	CYB5R3	0.410138	0.0450382	0.350599	3.04332	4.2e-06	0.000660346	-1.28968	0.142139	0.315275	-1.33296	0.872914	0.965703	1.21987	0.0122735	0.0836034	0.201113	0.209182	0.652981	0.907242	0.00151549	0.122876	0.589454	0.0109375	0.229375	0.401897	0.0838803	0.471578
NM_000399	EGR2	-0.725898	0.254291	0.399594	-0.375377	0.568098	0.765464	-1.72092	0.190826	0.380225	-1.39774	0.886856	0.971266	0.59044	0.0885215	0.270399	-0.470956	0.92769	0.995721	-0.612182	0.928005	0.992814	-0.732695	0.980823	0.998987	-0.594663	0.898879	0.988702
NM_000400	ERCC2	-2.6568	0.699769	0.734415	-0.710885	0.700724	0.851713	-9.30671	0.948695	0.984037	-0.140527	0.357685	0.627952	-0.469079	0.541574	0.741359	-0.00486393	0.478529	0.837218	-0.169122	0.625957	0.916169	-0.128565	0.646554	0.902217	0.02043	0.384969	0.790191
NM_000401	EXT2	-0.110733	0.116914	0.350599	1.15255	0.0359916	0.17388	-2.29543	0.265272	0.466535	0.82441	0.0467571	0.194904	-0.124461	0.36659	0.602184	0.271825	0.140961	0.576304	0.0817884	0.338241	0.789155	0.264833	0.14682	0.569167	0.0717556	0.331101	0.752571
NM_000402	G6PD	-0.154205	0.124956	0.350599	2.52171	0.000132438	0.00747611	-0.244493	0.0590236	0.179681	0.0250084	0.277229	0.547496	0.725011	0.061359	0.217632	-0.495896	0.936713	0.996798	-0.0595925	0.50151	0.868035	-0.419461	0.899232	0.983877	0.358131	0.104987	0.511881
NM_000403	GALE	-2.86079	0.734277	0.762585	-1.63002	0.902322	0.956862	-7.77553	0.897437	0.959298	0.381767	0.139493	0.369539	-2.41936	0.957438	0.980625	0.0744295	0.367037	0.775696	-0.478061	0.873307	0.984609	-0.509693	0.936334	0.993539	-0.840768	0.963827	0.998571
NM_000405	GM2A	-0.110702	0.116908	0.350599	0.582668	0.155037	0.385627	-2.0316	0.229971	0.426334	-0.709805	0.651953	0.851257	1.71593	0.00167615	0.0257122	-0.369513	0.877227	0.984308	0.263792	0.16287	0.643338	0.107925	0.322516	0.730612	0.0483009	0.355207	0.770656
NM_000406	GNRHR	NA	NA	NA	2.84082	2.94e-05	0.00317521	NA	NA	NA	1.68502	0.00322851	0.0376384	-0.105377	0.356579	0.593372	-0.189771	0.721224	0.939825	0.343034	0.109244	0.568601	-0.117298	0.632433	0.897628	-0.423309	0.808967	0.966923
NM_000407	GP1BB	NA	NA	NA	NA	NA	NA	NA	NA	NA	NA	NA	NA	NA	NA	NA	-0.832341	0.991335	0.999859	-0.119811	0.57138	0.89811	-0.278494	0.805006	0.957225	0.0797855	0.32308	0.746747
NM_000408	GPD2	-0.832772	0.281725	0.419019	0.298516	0.260823	0.506594	-0.21865	0.0574722	0.176514	1.05991	0.0236278	0.127266	0.862213	0.0405802	0.170187	-0.642211	0.972474	0.999859	-1.0527	0.990841	0.999863	-0.635436	0.967348	0.997924	-1.00074	0.982412	0.999781
NM_000409	GUCA1A	-0.182228	0.130309	0.350599	-0.0878527	0.436463	0.668881	-2.26224	0.260695	0.460905	0.7204	0.0617275	0.229786	1.28802	0.00955027	0.0726485	-0.0392509	0.527549	0.859386	-0.257791	0.714765	0.945528	-0.322541	0.840026	0.967019	-0.109329	0.525494	0.864084
NM_000411	HLCS	-0.805872	0.274795	0.413909	-0.246508	0.510515	0.724805	-2.84028	0.344621	0.548933	0.130944	0.230534	0.493685	-0.267643	0.439842	0.664302	0.0690951	0.37442	0.781002	0.179868	0.235816	0.715932	-0.134727	0.65423	0.905683	-0.0426979	0.452454	0.827735
NM_000412	HRG	0.365278	0.0494224	0.350599	0.297881	0.261075	0.506786	3.64693	0.000143732	0.00341801	-0.86031	0.719639	0.890162	1.33736	0.00782345	0.0645715	0.403259	0.0576327	0.420663	0.312688	0.12806	0.597578	0.140904	0.279914	0.698239	0.604261	0.0255186	0.300555
NM_000413	HSD17B1	-4.69931	0.929837	0.935754	-2.76894	0.971847	0.9892	-9.54471	0.953549	0.98602	-2.34863	0.982881	0.998174	-4.13498	0.992096	0.996551	-0.259963	0.79356	0.962295	-0.250759	0.708173	0.942893	-0.598191	0.960248	0.996692	-0.400861	0.793587	0.963298
NM_000414	HSD17B4	0.138911	0.0768169	0.350599	0.940099	0.0663704	0.244982	2.15575	0.00245941	0.0221558	-0.911275	0.740284	0.901957	-0.566724	0.588152	0.772553	0.303794	0.115659	0.539597	0.0627153	0.359625	0.80091	-0.0227989	0.505354	0.842156	0.211934	0.20151	0.643138
NM_000415	IAPP	0.388367	0.04717	0.350599	-1.23032	0.840294	0.928437	4.63577	1.6e-05	0.000813156	0.191428	0.20588	0.462906	0.221076	0.206363	0.438855	0.568613	0.0141693	0.265074	0.286729	0.145929	0.624192	0.435519	0.0442056	0.374296	0.262606	0.163449	0.596747
NM_000416	IFNGR1	-1.08703	0.348538	0.467385	2.55363	0.000113518	0.00704546	0.705844	0.0205605	0.0916205	0.00611321	0.286309	0.557613	1.63883	0.00231157	0.0306313	-0.48461	0.932883	0.995856	-1.70914	0.999542	0.999966	-1.45045	0.999603	0.999918	-0.703909	0.935167	0.996393
NM_000417	IL2RA	-0.822077	0.278937	0.417162	0.52197	0.175346	0.411744	-2.83455	0.343743	0.548252	-0.802295	0.694315	0.876539	-0.173435	0.391363	0.623813	0.00293754	0.467533	0.831502	-0.168319	0.625088	0.916169	-0.131681	0.650346	0.90384	-0.232292	0.652367	0.916626
NM_000418	IL4R	0.063192	0.0877907	0.350599	0.195106	0.305539	0.552938	-0.305903	0.0627264	0.187365	1.24877	0.0130934	0.0898786	0.563907	0.094863	0.282834	0.184134	0.228158	0.675197	-0.247502	0.70522	0.941535	-0.32237	0.839906	0.967019	0.638506	0.0203398	0.275718
NM_000419	ITGA2B	0.131846	0.0777838	0.350599	1.24786	0.0265276	0.145826	2.78634	0.00084414	0.0111499	0.0555539	0.263172	0.531983	1.46556	0.00467169	0.0468283	-0.162764	0.6897	0.927931	0.652046	0.0140669	0.285084	-0.045171	0.536268	0.856371	0.0832723	0.319543	0.745212
NM_000420	KEL	0.054682	0.0890955	0.350599	2.11326	0.000868205	0.0196714	2.06123	0.00291114	0.0250703	-1.47271	0.901706	0.977044	-0.905664	0.725438	0.859344	0.320554	0.103619	0.516489	0.0454091	0.379266	0.811469	0.00695057	0.462805	0.817332	-0.154185	0.573153	0.885464
NM_000421	KRT10	-0.318156	0.157897	0.350599	1.1706	0.0340786	0.168445	-0.963349	0.111061	0.269134	-0.889287	0.731458	0.896367	-0.590589	0.599127	0.780855	0.0923446	0.34277	0.761577	0.337917	0.112162	0.572515	0.312116	0.108971	0.507006	0.327646	0.121388	0.541524
NM_000422	KRT17	0.208074	0.0675984	0.350599	-0.506906	0.623746	0.803764	2.26646	0.00208297	0.0199781	-0.0146581	0.296039	0.567928	1.97535	0.000529867	0.0125603	0.332997	0.0953654	0.502122	0.211687	0.206606	0.690335	-0.113106	0.626999	0.895818	0.400718	0.0844082	0.472531
NM_000423	KRT2	0.0769313	0.0857397	0.350599	1.06575	0.0467044	0.200765	1.76355	0.00464961	0.03409	-0.992325	0.771566	0.919141	0.844806	0.0428517	0.175989	0.0490272	0.402576	0.79867	-0.106955	0.556807	0.892452	0.183876	0.228834	0.657036	0.181777	0.226869	0.669998
NM_000424	KRT5	0.322129	0.0540264	0.350599	2.31316	0.000372088	0.0132778	3.04446	0.000511047	0.0079473	2.09142	0.000836326	0.0168779	0.203717	0.213393	0.448322	0.396448	0.0606818	0.428858	0.0771972	0.343324	0.791461	0.418024	0.0509379	0.395193	0.396844	0.0861124	0.475099
NM_000425	L1CAM	0.207343	0.0676966	0.350599	0.722193	0.114271	0.328554	1.13484	0.0117153	0.0629736	-1.34432	0.875565	0.966624	0.736178	0.0593725	0.213393	0.539412	0.0185954	0.28598	-0.133657	0.587109	0.903308	0.0663952	0.378922	0.76828	0.357221	0.105473	0.512879
NM_000426	LAMA2	-1.20428	0.379152	0.489834	-0.712692	0.701323	0.852128	-2.80873	0.33965	0.543605	-1.5363	0.912916	0.980486	0.240609	0.198525	0.42964	0.00303348	0.467397	0.831432	-0.146046	0.600824	0.908317	-0.139245	0.659687	0.907625	0.466876	0.0590081	0.416285
NM_000427	LORICRIN	-3.80289	0.859356	0.87177	-3.08124	0.979068	0.992306	-7.65129	0.891126	0.955649	-1.824	0.950323	0.990773	-2.65502	0.966678	0.984667	0.063736	0.381845	0.785406	0.0644692	0.35768	0.799649	0.0768111	0.36461	0.758687	0.240183	0.179674	0.617909
NM_000428	LTBP2	NA	NA	NA	1.66303	0.00588824	0.0605288	NA	NA	NA	1.82776	0.00199592	0.0282894	2.00673	0.000439093	0.0108684	-0.315702	0.840087	0.974959	-0.393766	0.82329	0.973318	-0.00152074	0.474963	0.824856	-0.200777	0.621077	0.905149
NM_000429	MAT1A	0.139076	0.0767941	0.350599	2.04608	0.0011562	0.0232126	5.57378	4.56e-06	0.000442243	1.38547	0.00848006	0.0687946	0.516569	0.107094	0.30359	0.082307	0.356307	0.770216	0.340039	0.11102	0.571521	0.0202419	0.443931	0.806575	0.113715	0.289322	0.720776
NM_000430	PAFAH1B1	NA	NA	NA	1.82425	0.00301454	0.0411833	NA	NA	NA	0.317691	0.159924	0.400812	0.47676	0.117787	0.319891	-0.0765204	0.579591	0.883785	0.212127	0.206233	0.690335	0.0200719	0.444153	0.806856	-0.262489	0.680531	0.926226
NM_000432	MYL2	-0.405141	0.176879	0.353652	0.307166	0.257193	0.50314	-2.31074	0.267414	0.468919	-0.364536	0.475019	0.727718	0.747549	0.0574684	0.209325	-0.304868	0.831761	0.973696	-0.158527	0.614564	0.913065	-0.0811482	0.584964	0.879149	-0.0441053	0.453945	0.828633
NM_000433	NCF2	-0.0979436	0.114598	0.350599	0.434173	0.20698	0.44913	3.91511	8.9e-05	0.00252726	-0.0251857	0.300994	0.572978	0.763749	0.0547958	0.203664	-0.0557477	0.550799	0.869905	-0.0531878	0.493919	0.86508	0.00707832	0.462616	0.817182	-0.289917	0.705295	0.933354
NM_000434	NEU1	-0.237052	0.141121	0.350599	0.60295	0.148568	0.377198	-0.750735	0.0932364	0.240806	1.01637	0.0270565	0.138802	-0.225052	0.41805	0.64633	-0.384988	0.886467	0.987499	-0.456753	0.861731	0.981734	-0.111151	0.624569	0.895016	0.00468237	0.401471	0.799657
NM_000435	NOTCH3	-0.000924825	0.0978814	0.350599	1.42823	0.0142991	0.100898	-0.829414	0.0996382	0.251664	1.18525	0.0160383	0.101012	0.296888	0.176771	0.401687	-0.219593	0.754037	0.950686	-0.0617976	0.504178	0.868698	-0.245759	0.775676	0.948506	0.52345	0.0423798	0.368775
NM_000436	OXCT1	-0.0532345	0.106644	0.350599	-0.0454105	0.416459	0.651072	-1.08011	0.121871	0.286285	0.100444	0.243354	0.509337	1.73032	0.00157271	0.0245373	-0.290886	0.820512	0.970979	-0.0893792	0.536848	0.883776	-0.00992722	0.48688	0.830884	0.177255	0.230815	0.672688
NM_000437	PAFAH2	0.306959	0.0557058	0.350599	0.503848	0.181642	0.419311	1.93973	0.00357733	0.0285695	3.64167	8.34e-06	0.000903943	-0.254155	0.433093	0.658108	0.327983	0.0986272	0.50846	0.207984	0.209764	0.693488	0.248674	0.161268	0.588032	0.443193	0.0672881	0.437212
NM_000439	PCSK1	-0.042618	0.104835	0.350599	2.43941	0.000193402	0.00891269	6.17665	2.28e-06	0.000329514	1.2275	0.0139548	0.0931849	0.0764167	0.268463	0.509038	-0.000164959	0.471881	0.83392	0.0949982	0.323606	0.781185	-0.0473921	0.539196	0.85753	-0.217913	0.638197	0.911505
NM_000440	PDE6A	0.0618939	0.0879732	0.350599	-1.11937	0.817162	0.915865	2.26927	0.00207841	0.0199735	-0.261873	0.420359	0.683828	-0.244407	0.428141	0.654336	0.388087	0.0646963	0.438559	0.0233757	0.404603	0.824368	-0.010914	0.488337	0.831775	-0.152973	0.571847	0.88482
NM_000441	SLC26A4	0.102064	0.082007	0.350599	2.08041	0.00100274	0.0214365	4.39488	2.51e-05	0.00108527	1.02032	0.0266894	0.137722	1.45997	0.00478358	0.0475756	-0.00610984	0.480241	0.8373	0.247086	0.176174	0.655742	0.288985	0.126535	0.536842	-0.121706	0.538851	0.86944
NM_000443	ABCB4	-0.780089	0.268137	0.409354	-0.0553595	0.421153	0.65514	-2.48983	0.292944	0.496128	-1.17657	0.832122	0.946509	0.601402	0.0860432	0.265688	0.00683475	0.46208	0.828067	0.0800508	0.340214	0.790402	0.592261	0.0106103	0.225969	-0.146363	0.565184	0.882636
NM_000444	PHEX	0.510727	0.0363045	0.350599	3.39168	2.1e-06	0.000397831	4.81895	6.84e-06	0.000442243	0.936332	0.0342602	0.160555	0.620936	0.0814813	0.256335	-0.00513685	0.478899	0.8373	0.783773	0.00469099	0.186594	0.248347	0.161525	0.588044	1.01592	0.00116422	0.0852506
NM_000445	PLEC	-2.16076	0.604606	0.657442	-1.07053	0.805585	0.909192	-5.1951	0.683874	0.825444	-0.71133	0.652637	0.851815	-1.66609	0.898038	0.953307	-0.212394	0.746367	0.947834	0.0999733	0.318162	0.778239	0.26412	0.147446	0.570198	-0.0678783	0.479971	0.842906
NM_000446	PON1	-0.751782	0.260853	0.404154	0.667593	0.129297	0.350124	-2.68529	0.321115	0.525124	-1.01257	0.77892	0.92312	0.023137	0.293244	0.53398	-0.482692	0.932218	0.995721	0.216058	0.202694	0.686498	-0.0808017	0.584432	0.87874	-0.354933	0.759351	0.954186
NM_000447	PSEN2	-1.77647	0.52043	0.59293	-1.76728	0.917472	0.964468	-3.24948	0.406916	0.605983	-1.76281	0.944058	0.989268	-0.326312	0.469888	0.687404	-0.319486	0.843029	0.975503	0.515453	0.0383188	0.40342	-0.354514	0.862018	0.974041	-0.117366	0.53416	0.867565
NM_000448	RAG1	-0.69145	0.24567	0.393105	-0.648209	0.678617	0.83761	-0.145038	0.053393	0.168386	-1.06071	0.795857	0.930242	-0.911844	0.727642	0.860328	0.50913	0.0242278	0.315826	0.620193	0.0179831	0.314519	0.319596	0.103841	0.498201	0.146902	0.257753	0.69349
NM_000449	RFX5	-0.0068829	0.0988799	0.350599	0.530101	0.172542	0.407868	-1.63987	0.181164	0.368193	0.858123	0.0425463	0.183206	0.224118	0.205105	0.437633	0.387127	0.0651981	0.439814	0.0189886	0.409726	0.826707	0.111412	0.317745	0.725766	0.197533	0.213334	0.658601
NM_000450	SELE	-0.396589	0.174958	0.353016	0.542019	0.168587	0.402809	-4.6022	0.607048	0.770464	1.44672	0.00695757	0.0612682	1.02711	0.0238187	0.12351	-0.0894071	0.596968	0.891881	-0.1484	0.6034	0.909011	-0.133516	0.6527	0.905103	-0.160144	0.57934	0.887519
NM_000451	SHOX	-0.322098	0.158743	0.350599	0.191374	0.307179	0.554247	4.25251	4.56e-05	0.00174147	-1.54139	0.913725	0.980719	-1.02808	0.765592	0.882472	-0.260638	0.794201	0.962344	-0.29926	0.751311	0.955501	-0.474272	0.923448	0.990352	-0.254223	0.672933	0.923785
NM_000452	SLC10A2	-0.304684	0.155001	0.350599	1.3279	0.0202988	0.124848	-1.93733	0.217663	0.41262	0.375771	0.141372	0.372601	-0.985072	0.752088	0.875292	-0.11666	0.632953	0.907114	0.161657	0.253621	0.732584	0.145044	0.274724	0.694864	-0.210261	0.630467	0.908637
NM_000453	SLC5A5	-1.30786	0.405836	0.509282	0.917629	0.0704655	0.253491	-6.60942	0.82496	0.918756	0.149229	0.222995	0.485097	0.311101	0.171248	0.394427	-0.196332	0.728764	0.942839	-0.519161	0.892982	0.98709	-0.118047	0.633435	0.897798	-0.36558	0.767818	0.956396
NM_000454	SOD1	-1.07275	0.344773	0.464359	0.731273	0.1119	0.325301	-4.63768	0.611842	0.773942	-0.920468	0.743919	0.903851	0.535872	0.102003	0.295109	-0.0179107	0.497279	0.846322	-0.366087	0.803934	0.969225	-0.0785909	0.581529	0.877803	-0.591951	0.897785	0.988351
NM_000455	STK11	-0.995216	0.324375	0.449783	0.409628	0.216183	0.459556	-4.41405	0.581104	0.751696	0.928564	0.0351028	0.163151	-0.905	0.725202	0.859162	-0.643075	0.972597	0.999859	-0.35431	0.795228	0.966318	-0.164114	0.689166	0.918192	0.323692	0.123813	0.545896
NM_000456	SUOX	-0.241148	0.141961	0.350599	-0.0933913	0.439173	0.671002	-1.38324	0.152151	0.329468	0.073689	0.255034	0.52269	0.438355	0.129129	0.337644	-0.176487	0.705847	0.933994	-0.399172	0.826771	0.974351	-0.130137	0.648441	0.903008	-0.203654	0.624008	0.90681
NM_000457	HNF4A	0.310073	0.0553395	0.350599	0.700356	0.119949	0.336744	3.04853	0.000501921	0.00783294	1.0754	0.0226621	0.124053	0.217243	0.207957	0.441307	0.139466	0.281172	0.714449	0.294458	0.140493	0.616117	0.266413	0.145403	0.567344	0.539956	0.0384495	0.357199
NM_000458	HNF1B	-0.302119	0.154442	0.350599	0.0754096	0.360246	0.60262	-2.01224	0.227443	0.423459	0.272748	0.17538	0.423069	0.455609	0.123803	0.329056	-0.459361	0.923023	0.995131	0.451944	0.05797	0.464295	-0.0571163	0.552466	0.865223	-0.20051	0.6208	0.904915
NM_000459	TEK	-0.499373	0.198592	0.365305	-0.573817	0.650279	0.820597	-1.53704	0.169273	0.35272	0.126568	0.232411	0.496101	-0.0132002	0.310434	0.55012	-0.136726	0.658298	0.915912	-0.196587	0.654822	0.926924	0.0496922	0.402248	0.782861	-0.542312	0.876574	0.985252
NM_000460	THPO	-1.72506	0.508497	0.584276	0.34175	0.24274	0.487553	-5.63917	0.734865	0.860666	-0.43509	0.513131	0.757294	-1.16774	0.804796	0.90414	-0.33354	0.85316	0.978037	-0.89663	0.980564	0.999863	-0.244024	0.774024	0.948165	-0.889112	0.970906	0.999295
NM_000462	UBE3A	-1.21474	0.381814	0.491625	-0.441844	0.596657	0.784985	-3.6318	0.465726	0.658578	-1.16714	0.829385	0.945283	0.381817	0.14683	0.361425	0.288618	0.127363	0.555561	-0.242782	0.700824	0.940567	-0.302165	0.824569	0.963254	-0.434334	0.816191	0.9691
NM_000463	UGT1A1	-0.0182291	0.100736	0.350599	0.086148	0.355155	0.597219	-0.122792	0.0522021	0.166315	1.7254	0.00280722	0.0343684	1.00513	0.0257376	0.129356	0.0449905	0.408134	0.799974	0.136122	0.27983	0.752642	-0.329559	0.845037	0.968807	0.07553	0.327311	0.749825
NM_000465	BARD1	0.188555	0.070161	0.350599	3.44106	2.1e-06	0.000397831	4.24975	4.56e-05	0.00174147	1.23388	0.0136982	0.092068	0.677123	0.0701071	0.235025	-0.00206292	0.474404	0.834711	0.568926	0.0261828	0.351256	-0.0070334	0.482787	0.828088	0.194389	0.216074	0.660783
NM_000474	TWIST1	-1.17878	0.372546	0.485091	-1.13693	0.820984	0.91729	-4.94756	0.652824	0.80319	0.567058	0.0907049	0.287413	0.802336	0.0489018	0.19091	0.168896	0.245736	0.689706	0.24331	0.179305	0.658721	0.439557	0.0428467	0.370395	0.341802	0.113462	0.527499
NM_000475	NR0B1	NA	NA	NA	-0.350101	0.557072	0.757506	NA	NA	NA	-0.857591	0.718448	0.889506	-0.249331	0.430691	0.656188	-0.00170265	0.473977	0.834588	-0.366877	0.8045	0.969537	-0.245884	0.775815	0.948524	0.406653	0.0818128	0.466813
NM_000476	AK1	-1.71096	0.505186	0.581848	-0.725053	0.705437	0.85425	-7.31159	0.872316	0.946017	-0.260962	0.419892	0.68326	1.45378	0.0049229	0.0485216	0.0697909	0.373581	0.7809	0.22445	0.195329	0.67918	0.370197	0.0728048	0.444092	-0.0295609	0.43823	0.819747
NM_000477	ALB	-1.10327	0.352814	0.470604	0.162487	0.320023	0.565599	-4.02028	0.524314	0.708511	0.241969	0.186582	0.43794	-0.797237	0.686078	0.836825	0.652426	0.00616834	0.191168	0.672527	0.0118148	0.261613	0.590681	0.0107889	0.227325	0.428602	0.0728061	0.451075
NM_000479	AMH	0.00266853	0.0973128	0.350599	1.45912	0.0128023	0.094707	-0.838512	0.100444	0.252854	0.966345	0.0313674	0.151689	2.6689	1.9e-05	0.00153459	0.0268286	0.433508	0.812841	-0.429775	0.846271	0.97904	0.336051	0.0927087	0.479652	0.0775693	0.325264	0.748372
NM_000480	AMPD3	-0.984399	0.321498	0.447772	-0.942346	0.772862	0.891925	-2.87657	0.350165	0.554056	-0.857986	0.718604	0.889547	0.739302	0.0588743	0.212416	0.122413	0.302997	0.731666	0.211526	0.206725	0.690392	-0.0252038	0.508753	0.844363	-0.40342	0.795382	0.963642
NM_000482	APOA4	-0.0420955	0.104741	0.350599	1.82633	0.00299773	0.0410995	-0.314271	0.0632535	0.188456	1.23036	0.0138359	0.0926173	2.66122	2.11e-05	0.00153459	-0.0735155	0.575324	0.882267	-0.714855	0.954407	0.996533	0.32283	0.101529	0.493748	0.297159	0.140084	0.567731
NM_000483	APOC2	-1.53946	0.463992	0.551621	0.239618	0.285988	0.533654	-7.64275	0.890645	0.955336	0.476283	0.112856	0.328011	0.768992	0.0538965	0.201687	-0.217856	0.752261	0.950499	-0.0501578	0.49036	0.862706	-0.322879	0.840263	0.967019	-0.228943	0.648888	0.915812
NM_000484	APP	-0.568824	0.215272	0.373289	0.367662	0.232166	0.476281	-0.805283	0.0976852	0.248184	-0.679899	0.637731	0.842242	-1.15778	0.802265	0.902847	0.120082	0.306071	0.733238	-0.0674466	0.510939	0.872604	-0.228064	0.758502	0.943225	-0.312653	0.724814	0.94066
NM_000485	APRT	-0.722527	0.253429	0.399013	0.682592	0.124931	0.343955	1.24867	0.0100772	0.0573342	-0.357343	0.471129	0.725054	0.247645	0.19592	0.426276	-0.797844	0.989153	0.999859	-0.844794	0.974967	0.999863	-0.360756	0.866221	0.975643	-0.886714	0.970575	0.999214
NM_000486	AQP2	-1.76659	0.518199	0.591467	-0.312335	0.540169	0.745541	-5.52295	0.72223	0.851737	-1.50973	0.90838	0.979428	0.278644	0.183735	0.410191	0.0132583	0.452866	0.824271	0.119605	0.297112	0.764035	-0.0421779	0.532187	0.855544	0.0969779	0.305795	0.736324
NM_000488	SERPINC1	NA	NA	NA	2.18831	0.000605431	0.0163871	NA	NA	NA	2.05795	0.000909322	0.0175565	-0.127781	0.368236	0.603254	0.106569	0.323598	0.746527	0.106863	0.310691	0.773549	0.215778	0.193962	0.625418	-0.244502	0.664206	0.920672
NM_000489	ATRX	-0.258001	0.145366	0.350599	0.822589	0.0900579	0.289617	2.41133	0.00165634	0.0174368	-0.0852895	0.330078	0.603045	-0.884241	0.717982	0.855048	-0.481561	0.931735	0.995721	-0.0475414	0.487329	0.861395	-0.238032	0.768302	0.946801	-0.264869	0.682687	0.927153
NM_000490	AVP	-0.133762	0.121182	0.350599	0.411445	0.215517	0.458896	-3.99159	0.520015	0.705065	0.745567	0.0576293	0.219391	2.29953	0.000122439	0.00531354	0.0625763	0.383417	0.786445	-0.158573	0.614624	0.913065	-0.0939554	0.6021	0.886485	-0.137971	0.556507	0.878744
NM_000491	C1QB	-0.476364	0.193188	0.361973	0.00565066	0.392673	0.630943	2.88077	0.000714097	0.0100128	0.307059	0.163492	0.405786	-0.11474	0.361485	0.59778	-0.518568	0.944083	0.997785	-0.492775	0.880702	0.985082	-0.384155	0.880328	0.979584	-0.509961	0.860454	0.982614
NM_000492	CFTR	-0.780305	0.268186	0.409365	-1.41107	0.872576	0.943696	0.937794	0.0152607	0.0754262	0.994384	0.0288251	0.144051	-3.64233	0.98722	0.994166	0.478352	0.0318373	0.347336	0.607949	0.0197475	0.323459	1.42397	2.01e-06	0.00366322	0.283859	0.148926	0.579075
NM_000493	COL10A1	-1.08271	0.347413	0.466657	0.325968	0.249188	0.493713	-2.08729	0.237368	0.435257	-0.231395	0.404511	0.670225	-2.33812	0.953619	0.978938	0.2309	0.178394	0.621955	0.403488	0.0776171	0.510951	-0.160382	0.684776	0.916111	0.0313975	0.373417	0.78325
NM_000494	COL17A1	0.138237	0.0768998	0.350599	0.761437	0.104307	0.313368	3.43208	0.000223583	0.0045663	-0.0350094	0.305626	0.57771	1.19583	0.0134029	0.0879932	0.295261	0.122221	0.54856	-0.22848	0.687131	0.935898	0.0954806	0.339128	0.743125	0.390688	0.0888845	0.480849
NM_000495	COL4A5	-0.210875	0.135899	0.350599	-1.77448	0.918078	0.964752	1.20024	0.0107069	0.0593282	-0.0615515	0.318455	0.589614	-0.207711	0.409004	0.638306	-0.00201425	0.474358	0.834709	0.090591	0.328516	0.782786	-0.178555	0.705682	0.924019	0.457137	0.062304	0.424431
NM_000496	CRYBB2	-0.824199	0.279498	0.417648	0.118589	0.340109	0.583999	-4.04649	0.528286	0.711246	0.70631	0.0640759	0.234685	-0.0752025	0.341321	0.578465	0.0598279	0.387359	0.787845	-0.485425	0.877045	0.984974	-0.394202	0.88592	0.980752	-0.100382	0.515856	0.859903
NM_000497	CYP11B1	0.291086	0.0575011	0.350599	1.61341	0.00721682	0.0688069	1.00327	0.0139762	0.0710155	1.83403	0.00195838	0.0280661	2.68007	1.48e-05	0.00131986	0.455484	0.0384091	0.366998	0.121513	0.295103	0.762281	0.108273	0.322012	0.730195	0.479075	0.0551079	0.407047
NM_000498	CYP11B2	-1.02932	0.333346	0.456463	0.000857045	0.394811	0.632661	-4.58902	0.605271	0.769579	-0.66016	0.628039	0.836232	1.13106	0.0168206	0.100442	-0.321586	0.844587	0.976164	-0.23224	0.690623	0.936665	-0.196292	0.725433	0.931132	-0.531698	0.871652	0.984391
NM_000499	CYP1A1	-0.0585137	0.107603	0.350599	1.42902	0.0142634	0.100813	-3.48861	0.443465	0.639208	0.183244	0.209186	0.467612	1.64229	0.00227991	0.0303689	0.624662	0.00809733	0.212773	0.138559	0.277248	0.751349	0.756378	0.00175634	0.111665	0.476295	0.0559931	0.410772
NM_000500	CYP21A2	-0.376743	0.170589	0.351878	-0.298676	0.534045	0.741388	-0.383791	0.0675335	0.196027	-0.787307	0.687627	0.872707	-0.0371989	0.322229	0.561555	0.0145572	0.451022	0.823442	0.478756	0.0489112	0.437764	0.664685	0.00500206	0.171	0.291167	0.144103	0.572286
NM_000502	EPX	-2.72097	0.710926	0.743215	-1.28399	0.850677	0.933481	-5.66366	0.737534	0.862917	-2.50669	0.987697	0.999567	-1.42953	0.861544	0.934983	0.0273442	0.432796	0.812389	-0.411581	0.83492	0.976083	-0.0411178	0.530752	0.855409	-0.604962	0.903026	0.989811
NM_000504	F10	0.17036	0.0725511	0.350599	-1.38308	0.868066	0.940943	1.33077	0.00899807	0.0532218	1.42859	0.00737469	0.0633328	0.822962	0.0458493	0.183295	-0.321239	0.844356	0.976026	0.389611	0.0841709	0.523548	0.48766	0.0283985	0.319164	0.125406	0.278121	0.71226
NM_000505	F12	-2.02703	0.576505	0.635384	-0.787415	0.726446	0.867246	-6.58656	0.823121	0.917587	0.562554	0.0917873	0.289455	-1.29671	0.835235	0.921357	0.241116	0.16844	0.609549	0.258636	0.166899	0.646789	0.336348	0.0924979	0.479524	0.731861	0.0105824	0.209572
NM_000506	F2	-1.33861	0.413555	0.51497	1.08742	0.0437823	0.193575	-5.44755	0.713873	0.846534	-0.488848	0.541424	0.777964	-0.505452	0.559252	0.752423	-0.719148	0.982452	0.999859	-0.401821	0.828527	0.974443	-0.0857834	0.591317	0.881523	-0.389282	0.785424	0.960415
NM_000507	FBP1	-0.595921	0.221946	0.377646	-0.164906	0.472665	0.695754	0.0267087	0.0447987	0.151278	-1.10461	0.810202	0.937276	-1.14088	0.797834	0.900336	0.0125375	0.453948	0.824758	-0.0987835	0.547427	0.887722	-0.275749	0.802694	0.956655	-0.266501	0.684168	0.92755
NM_000508	FGA	-0.306622	0.155425	0.350599	0.408048	0.216799	0.460236	0.208062	0.0368501	0.133799	-0.278079	0.428695	0.690846	0.667188	0.0719437	0.23868	-0.15653	0.68245	0.92503	-0.391418	0.821584	0.972464	-0.470107	0.921808	0.990031	-0.208434	0.628729	0.90846
NM_000509	FGG	-0.0563947	0.107222	0.350599	1.14794	0.0365046	0.175404	0.111531	0.0409157	0.143176	0.884613	0.0396452	0.175773	1.81803	0.00107662	0.0194738	-0.423275	0.907063	0.993253	-0.176989	0.63436	0.918625	0.22935	0.180122	0.611447	0.145336	0.259216	0.694984
NM_000511	FUT2	-0.273424	0.14851	0.350599	1.56676	0.00861268	0.0760499	-0.472759	0.0732531	0.206374	0.631187	0.0775969	0.262521	0.298035	0.176317	0.401306	0.0363487	0.42017	0.804627	-0.668718	0.944049	0.99602	0.139628	0.281591	0.700248	-0.600954	0.901469	0.989375
NM_000512	GALNS	-1.24435	0.389516	0.497146	-0.759283	0.717095	0.861102	-2.18458	0.250167	0.450068	-2.14987	0.974349	0.997224	0.116327	0.250733	0.4899	0.211282	0.198227	0.642208	0.338212	0.112	0.572126	0.0475771	0.405357	0.784994	1.38968	5.62e-05	0.022224
NM_000514	GDNF	-1.03892	0.335895	0.458435	0.613792	0.145243	0.372342	-6.08291	0.779417	0.889812	-0.431391	0.511079	0.755797	1.74484	0.00146927	0.0235288	0.687773	0.00418717	0.163244	0.0758436	0.344777	0.792415	0.144014	0.275996	0.696268	0.652498	0.0186095	0.264853
NM_000517	HBA2	-1.9126	0.5513	0.616718	-0.800975	0.730829	0.869175	-4.62096	0.609594	0.772637	-0.547508	0.571797	0.798869	-1.68097	0.899809	0.953983	-0.696918	0.979907	0.999859	-0.645825	0.93804	0.995434	-0.244611	0.774576	0.948258	-1.1462	0.991025	0.999781
NM_000518	HBB	-3.12597	0.775412	0.797843	-1.58013	0.896118	0.953934	-6.13665	0.78437	0.892698	-1.49009	0.90483	0.977871	-3.29701	0.982122	0.991806	0.303901	0.115575	0.539597	0.0103106	0.419859	0.831351	0.137923	0.283708	0.701291	1.05905	0.000772804	0.0721841
NM_000519	HBD	-0.140394	0.122405	0.350599	0.765245	0.103344	0.311814	3.54829	0.000180235	0.00393173	-1.03086	0.78539	0.925477	1.0356	0.0231621	0.1215	0.344742	0.0882657	0.487125	-0.469379	0.868628	0.983463	-0.201585	0.731037	0.932987	-0.235352	0.655382	0.917666
NM_000520	HEXA	-0.0296711	0.102631	0.350599	0.0671889	0.364177	0.606082	1.95363	0.00348607	0.0280945	-0.651048	0.623668	0.833583	0.443929	0.127478	0.334961	-0.148365	0.67256	0.920266	-0.236689	0.694995	0.938755	-0.0533624	0.547372	0.862425	0.319732	0.126256	0.548572
NM_000521	HEXB	0.645961	0.0265341	0.350599	0.181401	0.311635	0.55799	1.34341	0.00884293	0.0525864	1.30901	0.0108243	0.0800872	2.76181	1.27e-05	0.00114015	0.330008	0.0972402	0.506259	0.869398	0.00219395	0.147282	0.987715	9.43e-05	0.0379361	0.396725	0.0861586	0.475099
NM_000522	HOXA13	NA	NA	NA	1.08898	0.0435974	0.193423	NA	NA	NA	-0.174075	0.374816	0.644404	4.81272	2.11e-06	0.000579124	0.206485	0.203397	0.647542	-0.023518	0.459059	0.849935	-0.187512	0.715792	0.927899	0.39554	0.0866644	0.475732
NM_000523	HOXD13	-0.184828	0.130804	0.350599	0.824133	0.0897636	0.28943	-1.99603	0.225321	0.421234	0.65425	0.0733381	0.254503	0.834223	0.0442323	0.179277	-0.208155	0.741757	0.946109	-0.485475	0.877071	0.984974	-0.582452	0.95672	0.996408	0.536769	0.0391862	0.359371
NM_000524	HTR1A	-3.65486	0.843289	0.856943	-0.214645	0.495907	0.714166	-9.71406	0.956595	0.986633	-5.05357	0.999931	0.99999	0.36284	0.153096	0.36965	0.0598116	0.387391	0.787845	-0.313317	0.763076	0.958933	-0.343184	0.854537	0.971716	-0.371719	0.77242	0.957889
NM_000525	KCNJ11	-2.58991	0.68787	0.724625	-1.43504	0.876183	0.945649	-7.49369	0.882726	0.951996	-0.625241	0.610875	0.82532	-0.805661	0.689213	0.839042	0.409728	0.0548386	0.412769	0.461891	0.054381	0.452222	0.623434	0.0077299	0.200867	0.823022	0.00543974	0.158801
NM_000526	KRT14	0.302089	0.0562841	0.350599	0.837717	0.0867301	0.283812	1.19159	0.0108141	0.0596382	0.587038	0.0865149	0.280542	-0.46884	0.54146	0.741359	0.0306467	0.428177	0.808896	0.0281181	0.399019	0.822448	0.740738	0.00208754	0.121389	0.408855	0.0809196	0.465533
NM_000528	MAN2B1	-0.136049	0.121598	0.350599	1.71271	0.00485186	0.0545108	-0.205986	0.0567216	0.17489	0.728835	0.0603323	0.22647	-0.468356	0.54119	0.741142	-0.273477	0.80572	0.966621	0.207053	0.210573	0.694445	-0.0777875	0.580407	0.877304	-0.399983	0.793001	0.963298
NM_000529	MC2R	-1.40705	0.431013	0.527564	-0.146587	0.46395	0.688824	-7.53791	0.885008	0.952702	1.18811	0.0158714	0.100334	0.868189	0.039816	0.168534	-0.0563942	0.55173	0.870009	-0.038786	0.47714	0.857201	-0.586363	0.957655	0.996692	0.0149775	0.390625	0.793775
NM_000530	MPZ	-0.361175	0.16725	0.351141	1.12963	0.0385458	0.181198	1.22292	0.0103875	0.05823	0.37137	0.142653	0.374377	-0.672958	0.635435	0.80531	-0.557961	0.955156	0.998997	-0.339202	0.783807	0.963764	-0.389379	0.883309	0.980752	-0.158157	0.577288	0.887273
NM_000531	OTC	-0.429381	0.18237	0.356587	-1.35672	0.863641	0.938827	0.669535	0.0215712	0.0947486	-0.181126	0.378514	0.647508	-0.84921	0.705546	0.848186	-0.00749821	0.482293	0.83801	0.0499933	0.374043	0.809582	0.278468	0.135216	0.549454	-0.00742223	0.414277	0.806189
NM_000533	PLP1	0.250277	0.0623345	0.350599	1.98391	0.00154091	0.0274363	-0.332423	0.0642938	0.190451	0.799904	0.0499543	0.202649	1.96197	0.000553088	0.0128481	0.116554	0.310665	0.73577	0.131721	0.28427	0.756146	0.365506	0.0752436	0.450018	0.387328	0.0904883	0.484446
NM_000535	PMS2	NA	NA	NA	NA	NA	NA	NA	NA	NA	NA	NA	NA	NA	NA	NA	0.268442	0.143927	0.580431	0.421766	0.0695599	0.494444	0.565913	0.013844	0.245821	0.495964	0.049893	0.389379
NM_000537	REN	-0.00740265	0.0989637	0.350599	1.73174	0.00448818	0.0521243	1.2019	0.0106795	0.059221	-0.615313	0.606009	0.82181	0.947204	0.0309603	0.144335	-0.0825137	0.587624	0.887564	0.128699	0.287457	0.758292	0.216236	0.193472	0.625018	-0.292033	0.707003	0.933841
NM_000538	RFXAP	-0.427491	0.181953	0.356148	1.90713	0.00210429	0.0330054	0.586979	0.0238937	0.100966	0.734812	0.0593646	0.224033	0.628051	0.0799677	0.253268	-0.0344162	0.520656	0.855787	-0.89771	0.980676	0.999863	-0.0284687	0.513221	0.846383	-0.749368	0.946426	0.997236
NM_000539	RHO	-1.42743	0.436241	0.531582	0.480154	0.190059	0.428817	-7.45633	0.880657	0.950836	1.86967	0.00173939	0.0261877	-0.603195	0.604859	0.78495	0.103438	0.327731	0.750198	0.398161	0.0801021	0.516079	0.419074	0.0505103	0.393679	0.0654863	0.337446	0.756431
NM_000540	RYR1	0.120871	0.0793268	0.350599	0.696207	0.121084	0.338262	0.867188	0.0166661	0.079854	0.986283	0.029553	0.146218	0.703111	0.0652074	0.225576	0.145683	0.273551	0.708933	0.311914	0.128596	0.597988	-0.280988	0.807198	0.957687	0.306874	0.13405	0.560455
NM_000541	SAG	-1.54374	0.465019	0.552452	-1.5723	0.895178	0.953525	-2.10765	0.240078	0.438245	-0.948616	0.754977	0.910181	-1.54641	0.880943	0.944341	0.0972757	0.336055	0.755982	0.339809	0.111133	0.571521	0.458153	0.0366182	0.350104	0.467278	0.0588876	0.416285
NM_000542	SFTPB	-0.494837	0.197519	0.364924	0.462429	0.196509	0.436301	-1.95967	0.220512	0.416307	-1.00412	0.775842	0.921483	0.522011	0.105733	0.301548	-0.120712	0.638298	0.909264	-0.101621	0.550622	0.889582	-0.0165255	0.49637	0.837878	-0.337545	0.745527	0.948805
NM_000543	SMPD1	-2.31419	0.635733	0.682358	-2.0791	0.942429	0.975906	-4.86976	0.643009	0.796212	-0.17338	0.37447	0.644155	-2.13452	0.941609	0.973548	0.14215	0.277794	0.711423	0.218538	0.200498	0.683942	0.333339	0.0944831	0.482719	0.104334	0.298385	0.729773
NM_000545	HNF1A	0.275615	0.0593424	0.350599	0.598178	0.149993	0.378848	0.47663	0.0271288	0.109357	0.231822	0.190332	0.443248	-0.170209	0.389722	0.622324	0.234758	0.174528	0.61753	0.0842335	0.335515	0.787271	0.27131	0.141206	0.559985	0.512158	0.045473	0.377405
NM_000548	TSC2	0.00240488	0.0973457	0.350599	0.219191	0.294921	0.541927	0.558747	0.024747	0.103161	1.38946	0.00837369	0.0683213	-1.42771	0.8612	0.934786	0.14461	0.274813	0.709861	-0.43247	0.847947	0.979528	-0.0220454	0.504355	0.841833	0.319525	0.126407	0.548572
NM_000549	TSHB	-0.499227	0.19855	0.365305	0.36	0.235151	0.479644	-1.23785	0.136935	0.308084	0.155625	0.220354	0.482008	-1.27469	0.830265	0.918425	-0.149314	0.673768	0.920486	-0.237325	0.695563	0.938755	-0.246347	0.776256	0.948551	-0.734114	0.942891	0.997236
NM_000550	TYRP1	0.250237	0.0623381	0.350599	1.8906	0.00226616	0.0346039	-1.65467	0.183016	0.370617	0.395358	0.135314	0.363491	0.703669	0.0651008	0.225388	0.443965	0.0421707	0.378335	0.0962607	0.322165	0.780461	0.281457	0.132842	0.545854	0.179265	0.229013	0.671391
NM_000552	VWF	-0.887524	0.296033	0.429843	0.517904	0.176752	0.413209	-4.13755	0.541653	0.721323	1.06666	0.0232357	0.126062	-0.997119	0.755723	0.877302	0.232402	0.176903	0.620331	0.299163	0.137227	0.611286	0.148893	0.269922	0.690566	-0.101093	0.51658	0.86014
NM_000553	WRN	0.0343644	0.0922762	0.350599	1.42602	0.0144463	0.101548	-0.663682	0.0866247	0.22953	2.20937	0.000561027	0.0131938	0.0450163	0.283099	0.523952	-0.164801	0.692119	0.92913	0.020912	0.40738	0.824947	0.0203851	0.443706	0.806432	0.260961	0.164643	0.599381
NM_000554	CRX	0.290347	0.0575818	0.350599	0.0259792	0.383135	0.622507	2.09744	0.00274231	0.0239999	-0.0130499	0.29524	0.567186	0.453408	0.124529	0.330339	0.0997528	0.332731	0.753249	0.233857	0.187178	0.66865	0.228549	0.180929	0.612612	0.599228	0.0263115	0.30421
NM_000555	DCX	-0.973492	0.318673	0.446138	0.343815	0.241931	0.486766	-5.67281	0.738474	0.86352	0.270503	0.176194	0.424211	1.16452	0.0150073	0.0945917	-0.0779579	0.581472	0.88463	0.186726	0.229236	0.712523	0.0470705	0.406138	0.785263	-0.126037	0.54356	0.872168
NM_000557	GDF5	-0.596068	0.221978	0.377646	0.105743	0.346069	0.589802	-2.86059	0.347688	0.551756	-0.213661	0.395301	0.662202	0.58424	0.0900415	0.27328	-0.672194	0.97687	0.999859	-0.729119	0.957241	0.997289	-0.320644	0.83872	0.967019	-0.510269	0.860618	0.982614
NM_000558	HBA1	-0.53567	0.207248	0.369331	-0.839623	0.74277	0.875468	-0.916481	0.106941	0.262909	-0.962974	0.760429	0.912687	0.576397	0.0918865	0.277151	-0.399135	0.894317	0.989472	0.15004	0.265433	0.743503	-0.174002	0.700529	0.922567	1.283	0.000116422	0.0310351
NM_000560	CD53	-0.0399011	0.104364	0.350599	2.27739	0.000435154	0.0141306	0.841577	0.0172661	0.0817715	0.39627	0.135051	0.36324	1.59151	0.0027971	0.0343951	0.0589831	0.388595	0.789105	0.0203433	0.408048	0.825314	-0.127347	0.645101	0.90177	-0.111584	0.527978	0.865014
NM_000561	GSTM1	-0.53201	0.206386	0.368704	1.47605	0.0119699	0.0909679	-5.07274	0.668499	0.813957	3.41803	1.46e-05	0.00129704	0.431518	0.131092	0.340152	-0.367567	0.876061	0.984082	-0.507296	0.887719	0.986153	-0.407087	0.892739	0.982172	-0.846091	0.964658	0.998589
NM_000562	C8A	-1.83803	0.534487	0.603787	-0.363613	0.563049	0.761596	-4.1625	0.545196	0.72424	-1.19697	0.838101	0.949822	-1.62903	0.893218	0.950818	-0.346076	0.862026	0.980337	-0.886998	0.979614	0.999863	-0.397029	0.887454	0.981206	-0.0187784	0.426618	0.813941
NM_000564	IL5RA	0.0486299	0.0900453	0.350599	0.191211	0.307242	0.554276	-0.168048	0.0545839	0.170535	0.14139	0.226248	0.489354	0.0299665	0.29001	0.530837	0.175743	0.237904	0.684325	0.515422	0.0383268	0.40342	0.629714	0.00727627	0.19797	0.107459	0.295494	0.726562
NM_000565	IL6R	-1.59357	0.477175	0.561674	-1.12375	0.818163	0.916334	-3.44979	0.437826	0.63471	-0.181811	0.378906	0.647917	-1.61892	0.891812	0.950288	0.759013	0.00186275	0.120091	-0.0234105	0.45892	0.849935	0.414677	0.0522807	0.400116	1.1617	0.000315143	0.0501797
NM_000566	FCGR1A	-0.42467	0.1813	0.355914	-0.289916	0.530246	0.738382	-0.62652	0.0838094	0.224514	-0.537181	0.566558	0.795861	-0.245065	0.428531	0.654672	-0.407646	0.898994	0.990499	-0.597981	0.923397	0.991674	-0.320062	0.838304	0.967019	-0.329948	0.739449	0.946021
NM_000567	CRP	-0.4935	0.197224	0.364778	0.869209	0.0801503	0.271734	-2.40711	0.281176	0.483577	0.99405	0.0288543	0.144073	0.865387	0.0401517	0.169147	-0.38783	0.888065	0.988166	-0.455171	0.860818	0.981446	-0.474759	0.92362	0.990352	-0.656241	0.92107	0.994004
NM_000570	FCGR3B	-1.23748	0.387675	0.495663	0.276307	0.270331	0.517173	-5.12678	0.675508	0.81933	-0.118898	0.346706	0.617467	0.019449	0.29492	0.535709	0.0395966	0.415748	0.803226	0.45951	0.055216	0.454893	-0.0534251	0.547454	0.86244	0.0996967	0.303116	0.733968
NM_000572	IL10	-1.0193	0.330772	0.454557	0.988713	0.0581361	0.227609	-6.02944	0.774266	0.886306	1.84986	0.00186036	0.0271479	-0.886345	0.718708	0.855471	-0.208714	0.742397	0.946109	-0.6253	0.932096	0.994244	-0.0296907	0.514887	0.847409	-0.815359	0.95964	0.998346
NM_000574	CD55	-0.735641	0.256745	0.401368	-0.079504	0.43245	0.665473	-1.52382	0.167747	0.350763	-0.239347	0.408657	0.673236	-0.932207	0.734729	0.864603	-0.423249	0.907053	0.993253	-1.0067	0.988555	0.999863	-0.630566	0.966467	0.997539	-0.882047	0.970023	0.999171
NM_000575	IL1A	0.275167	0.0593977	0.350599	1.21748	0.0293992	0.154476	-1.70483	0.188891	0.377577	-0.419601	0.504778	0.750789	2.16292	0.000215324	0.00708186	0.262063	0.149508	0.590489	0.355512	0.101933	0.555818	0.216718	0.192985	0.624974	0.266375	0.160685	0.592985
NM_000576	IL1B	-0.222153	0.138177	0.350599	3.42942	2.1e-06	0.000397831	-2.62309	0.312263	0.516709	-1.58674	0.920952	0.982936	-0.108196	0.358019	0.594351	-0.242009	0.776703	0.957565	0.457778	0.0558061	0.456709	0.549471	0.0161864	0.258894	-0.22317	0.643212	0.913372
NM_000578	SLC11A1	-1.3948	0.42787	0.525337	-0.430205	0.591723	0.781919	-1.33061	0.146463	0.321159	-1.88988	0.956513	0.991724	-1.92852	0.925931	0.967101	0.0972578	0.336073	0.755982	-0.150108	0.60532	0.909168	-0.220292	0.75079	0.940867	0.224772	0.1913	0.631761
NM_000579	CCR5	-0.0553072	0.107016	0.350599	-0.297098	0.533454	0.74101	-2.14666	0.245099	0.444024	1.38227	0.00856139	0.069164	0.840262	0.0434005	0.177264	0.0647201	0.380404	0.784742	-0.235918	0.694231	0.938604	0.536788	0.0181816	0.270175	-0.214864	0.635086	0.910033
NM_000581	GPX1	-0.335697	0.161686	0.350659	3.04238	4.2e-06	0.000660346	-7.22614	0.867156	0.943636	0.883437	0.0397766	0.1761	1.95754	0.000563643	0.0129756	-0.38144	0.884351	0.98688	-0.203028	0.661474	0.92881	-0.288237	0.813155	0.958471	0.11537	0.287774	0.719814
NM_000582	SPP1	-0.307178	0.155536	0.350599	-1.47431	0.88193	0.948492	1.37763	0.00835242	0.0505123	0.0479292	0.266619	0.53527	-1.17996	0.807787	0.905924	0.12314	0.302006	0.730495	0.292365	0.141928	0.618018	0.497702	0.0260119	0.308104	0.272968	0.156134	0.586694
NM_000583	GC	-0.182368	0.130339	0.350599	2.44322	0.000193402	0.00891269	2.30783	0.00195749	0.0193249	0.260987	0.179614	0.428487	1.84345	0.000945738	0.0178929	-0.212958	0.747002	0.947919	-0.194927	0.652991	0.92604	-0.249639	0.779343	0.949321	-0.0719479	0.484478	0.845226
NM_000584	CXCL8	-0.706537	0.249446	0.395633	0.159399	0.321526	0.567234	-0.926128	0.107776	0.264158	-1.69506	0.936047	0.986578	-0.364362	0.489042	0.70118	0.356746	0.0812744	0.472074	0.010236	0.419943	0.831351	0.00659775	0.463292	0.817699	-0.00589837	0.412647	0.805224
NM_000586	IL2	-0.322938	0.158916	0.350599	0.398744	0.220333	0.463766	-0.933872	0.108413	0.265217	-0.63646	0.616391	0.828717	0.145111	0.2381	0.476863	-0.420093	0.905413	0.992645	-0.109419	0.559627	0.894241	-0.149032	0.671739	0.912255	-0.613211	0.906081	0.990753
NM_000587	C7	0.313621	0.0549394	0.350599	1.1254	0.0390104	0.182433	1.92656	0.00364121	0.0289541	0.782145	0.0523736	0.208021	2.76223	1.27e-05	0.00114015	0.124082	0.300783	0.729363	0.413277	0.0731871	0.500776	0.411935	0.0533546	0.403148	0.305192	0.135112	0.562079
NM_000588	IL3	0.114295	0.0802639	0.350599	-0.255205	0.514532	0.727778	1.69585	0.00516294	0.0366262	1.02617	0.0262723	0.136378	1.6402	0.00230735	0.0306209	0.106592	0.323564	0.746527	0.128996	0.28715	0.758292	-0.0205795	0.502325	0.841194	0.24217	0.178213	0.615981
NM_000590	IL9	-1.40415	0.430258	0.526904	0.791522	0.0970035	0.301023	-8.42957	0.924308	0.9731	0.95219	0.0326772	0.156053	1.06925	0.0207429	0.113243	0.530697	0.0200045	0.292925	0.602115	0.0206247	0.326904	0.344061	0.0877387	0.471783	0.279048	0.152134	0.581905
NM_000591	CD14	-0.936216	0.308959	0.439859	0.55655	0.16371	0.396948	-4.44227	0.584991	0.754473	0.590441	0.0858288	0.278883	-0.449585	0.531912	0.734195	-0.112128	0.6273	0.905108	0.44204	0.0615489	0.471432	-0.12767	0.645464	0.901863	0.209576	0.203326	0.645536
NM_000593	TAP1	-0.333874	0.161286	0.350643	0.777834	0.100279	0.307408	-1.8017	0.200634	0.3918	-0.115172	0.344802	0.615958	0.730915	0.0602781	0.215223	-0.376361	0.881378	0.986121	-0.35602	0.796451	0.966661	-0.134205	0.653559	0.905125	-0.468911	0.83745	0.976353
NM_000594	TNF	0.0383194	0.0916462	0.350599	0.624748	0.141942	0.367804	1.94408	0.0035568	0.0284672	-1.10115	0.809044	0.936741	0.0184617	0.295343	0.536065	-0.361835	0.872334	0.983142	0.337523	0.112375	0.572985	-0.249341	0.779042	0.949321	0.426931	0.0734164	0.451737
NM_000595	LTA	-2.34251	0.641378	0.686874	-1.48132	0.88296	0.948991	-8.2785	0.918903	0.970136	-0.486817	0.540348	0.777366	0.876598	0.0387879	0.165985	-0.343271	0.860009	0.979817	-0.277681	0.732672	0.951264	-0.0773034	0.579811	0.877304	-0.762773	0.949372	0.997236
NM_000596	IGFBP1	-0.405375	0.176934	0.353652	1.56823	0.00855592	0.0758016	-2.55237	0.30212	0.505968	-0.864854	0.72148	0.891093	0.227496	0.20375	0.436114	0.0131435	0.453045	0.824271	0.300906	0.136053	0.608684	-0.16495	0.690053	0.918487	0.300201	0.138163	0.566092
NM_000597	IGFBP2	-1.70055	0.50274	0.580057	-0.187929	0.483504	0.704433	-2.9008	0.353754	0.55742	-1.86919	0.954632	0.991199	-1.84428	0.918065	0.963295	-0.259922	0.793518	0.962295	-0.230095	0.688634	0.936427	-0.155525	0.679344	0.914461	0.13232	0.271451	0.705712
NM_000598	IGFBP3	-1.11998	0.35721	0.473909	0.396687	0.22109	0.464596	-4.01199	0.522963	0.707595	-0.568853	0.582454	0.805988	-0.295779	0.4544	0.675561	0.169701	0.244821	0.688666	0.112231	0.305049	0.769404	-0.176686	0.703594	0.923579	-0.359323	0.762944	0.955152
NM_000599	IGFBP5	-0.0448267	0.10521	0.350599	1.16989	0.0341711	0.168794	3.72188	0.000130043	0.00320367	1.26994	0.0122842	0.0866056	0.476275	0.117918	0.319982	-0.1136	0.629141	0.905774	-0.0737933	0.518359	0.876181	-0.218404	0.748815	0.94031	0.22649	0.189981	0.630304
NM_000600	IL6	-0.948706	0.31223	0.442033	-0.727979	0.706399	0.854483	-3.07861	0.380693	0.58196	-0.14972	0.362405	0.63254	0.161486	0.230933	0.46961	-0.303626	0.830825	0.973575	-0.354503	0.795375	0.966385	-0.301172	0.8237	0.962919	-0.428859	0.812733	0.968229
NM_000601	HGF	-1.92737	0.554613	0.618917	-0.742398	0.711365	0.857456	-9.3061	0.948683	0.984037	0.0856226	0.249738	0.516494	2.25342	0.000158327	0.00619284	0.10761	0.322289	0.745477	-0.0368037	0.474866	0.855769	0.107447	0.323135	0.731244	0.611303	0.0243483	0.294835
NM_000602	SERPINE1	-0.608741	0.225055	0.379516	0.0499564	0.372059	0.612935	-2.49894	0.294263	0.497827	0.32035	0.159067	0.399918	-0.306334	0.45958	0.679405	-0.143061	0.666073	0.918009	0.0859157	0.333644	0.785979	-0.2911	0.815632	0.959865	-0.30966	0.722246	0.939678
NM_000603	NOS3	-0.700005	0.247844	0.394619	-0.696427	0.695706	0.848855	-0.945885	0.109455	0.266646	-0.525325	0.560462	0.790702	-0.632382	0.617831	0.79396	0.324865	0.100711	0.511904	0.253958	0.170588	0.650818	0.177797	0.235723	0.661916	0.633231	0.0210142	0.279674
NM_000605	IFNA2	0.0787979	0.0854642	0.350599	1.25637	0.0258275	0.143769	-1.19006	0.132302	0.301185	1.15605	0.017517	0.106582	2.04479	0.000382095	0.0102622	0.136139	0.285386	0.717537	-0.114751	0.565609	0.895859	0.0100675	0.458345	0.814689	0.283736	0.149005	0.579221
NM_000606	C8G	-1.19124	0.37577	0.487383	-0.113085	0.448229	0.677488	-4.07628	0.532682	0.714749	-0.821724	0.702914	0.881587	0.246133	0.196456	0.426766	-0.0018565	0.474177	0.834621	-0.25001	0.707555	0.942704	-0.156882	0.680745	0.914781	0.237216	0.181916	0.621627
NM_000608	ORM2	-0.50925	0.200945	0.366179	0.741041	0.109348	0.321321	-0.740112	0.0924014	0.239349	-0.589781	0.593206	0.813631	-0.391918	0.502951	0.711594	-0.257239	0.790937	0.96201	-0.58569	0.919195	0.991651	-0.361407	0.866673	0.975835	-0.832662	0.96259	0.998506
NM_000611	CD59	-0.119244	0.118495	0.350599	-0.357261	0.560194	0.759425	0.372399	0.0306833	0.118556	1.41602	0.0076917	0.0649272	-0.0955815	0.351635	0.58897	-0.0317827	0.517111	0.854637	-0.1924	0.650261	0.924763	-0.0880035	0.594305	0.883452	-0.164789	0.584205	0.88962
NM_000612	IGF2	-0.384263	0.172236	0.35217	-0.115703	0.449432	0.678179	-1.05129	0.11914	0.282031	0.443542	0.121593	0.341136	0.170487	0.227055	0.464698	0.0857977	0.351666	0.76751	-0.849307	0.975511	0.999863	-0.397365	0.88761	0.981206	-0.376178	0.77573	0.958415
NM_000613	HPX	0.240341	0.063545	0.350599	1.18503	0.0325987	0.164041	2.02159	0.00308453	0.0257799	0.992224	0.0290149	0.144408	-0.222339	0.416589	0.644677	0.167465	0.247376	0.691252	0.233444	0.187517	0.668762	0.109243	0.32072	0.728769	0.451214	0.0643073	0.430014
NM_000614	CNTF	-2.88348	0.737937	0.765654	-2.53444	0.964439	0.986191	-7.20807	0.866126	0.943073	-2.00467	0.965512	0.994363	0.213266	0.209553	0.443198	0.345743	0.0876635	0.486574	0.278263	0.152109	0.633949	0.32409	0.100691	0.493322	0.135907	0.268097	0.702673
NM_000617	SLC11A2	-0.193333	0.132456	0.350599	-0.25546	0.51464	0.727885	0.229533	0.0360379	0.131672	0.076095	0.253964	0.52165	0.25752	0.192021	0.421141	-0.18355	0.714106	0.937171	-0.129048	0.581934	0.901484	-0.102228	0.613019	0.8909	-0.358509	0.76231	0.955152
NM_000619	IFNG	-1.03641	0.33522	0.458002	0.667495	0.129344	0.350174	-2.48673	0.292517	0.495843	-1.30148	0.865529	0.962251	-1.02492	0.764617	0.882227	-0.147666	0.671707	0.920259	-0.133198	0.586625	0.903078	0.0887051	0.348251	0.749089	-0.035044	0.444083	0.823115
NM_000623	BDKRB2	0.164076	0.0734299	0.350599	0.0215919	0.385111	0.624268	0.58533	0.0239394	0.101034	-0.655581	0.625899	0.834888	0.704964	0.0648802	0.225064	0.672875	0.00493789	0.176167	-0.203781	0.662313	0.928844	0.632021	0.00711167	0.196896	0.682131	0.0151851	0.24578
NM_000624	SERPINA5	-0.312401	0.156651	0.350599	0.575943	0.157229	0.388128	-2.33733	0.271179	0.472541	-0.211843	0.394316	0.66121	0.723624	0.0616102	0.218389	-0.115696	0.631782	0.907017	0.0517031	0.372176	0.809399	0.0724464	0.370421	0.763001	-0.267876	0.685423	0.927814
NM_000625	NOS2	0.25497	0.0617818	0.350599	-0.404467	0.580619	0.773712	2.10933	0.00268528	0.0235848	-0.00152527	0.289915	0.561476	-0.18959	0.399773	0.631756	0.198867	0.211578	0.65595	0.164853	0.250479	0.72867	0.00259026	0.469087	0.821154	0.65357	0.0184831	0.26452
NM_000626	CD79B	-0.0849245	0.112276	0.350599	1.02131	0.0530887	0.216031	-1.3877	0.152666	0.330229	0.27039	0.176237	0.424273	-0.243704	0.427733	0.653973	0.222643	0.186508	0.629209	0.204637	0.212751	0.696141	0.471705	0.0325375	0.333538	0.177831	0.230354	0.672688
NM_000628	IL10RB	-1.54569	0.465513	0.552868	-0.511519	0.62565	0.804422	-5.6037	0.731155	0.857883	-1.13139	0.818703	0.941667	1.06384	0.0211229	0.11445	0.355583	0.0819006	0.472473	-5.07e-05	0.431742	0.837605	0.163396	0.252024	0.674996	0.384796	0.0917428	0.48748
NM_000629	IFNAR1	0.01985	0.0945769	0.350599	-0.314358	0.54106	0.746079	0.856597	0.0168805	0.0803935	-0.306942	0.44412	0.704685	-0.155898	0.382623	0.616509	0.190289	0.221221	0.667151	0.336756	0.112887	0.573991	0.149514	0.269148	0.690103	-0.189388	0.60957	0.899431
NM_000631	NCF4	-0.999045	0.325395	0.450771	-0.510364	0.625158	0.804416	-2.63715	0.314132	0.518268	0.0747404	0.254571	0.522086	-0.923407	0.731693	0.862277	0.743339	0.00219595	0.126762	0.418533	0.0710192	0.498802	0.878772	0.000413493	0.065518	0.629029	0.0216526	0.28319
NM_000633	BCL2	-0.146388	0.123499	0.350599	0.872395	0.0795154	0.270359	0.0822122	0.0422207	0.145985	-0.903004	0.737175	0.8999	-0.637155	0.620012	0.795281	0.18328	0.229074	0.676217	0.0650851	0.356991	0.799399	0.233128	0.176401	0.605904	0.359102	0.104507	0.511513
NM_000634	CXCR1	0.124925	0.078753	0.350599	-0.329776	0.54797	0.751189	0.391009	0.0300537	0.117283	-0.574367	0.585214	0.807782	1.65829	0.0021448	0.0294897	0.0581805	0.389693	0.789907	-0.238077	0.696278	0.938755	0.407485	0.0552414	0.408542	0.272112	0.156723	0.587493
NM_000638	VTN	-0.354782	0.16583	0.351115	0.0264196	0.382929	0.622347	-1.14438	0.127894	0.294734	-0.26594	0.422459	0.685994	-0.0352252	0.321296	0.560734	0.563829	0.0148217	0.268841	0.325562	0.119856	0.584847	0.523261	0.0206345	0.282979	-0.319452	0.730819	0.94292
NM_000639	FASLG	0.146694	0.0757964	0.350599	1.51108	0.0104815	0.0841145	-0.59979	0.0817926	0.221149	1.3188	0.0104697	0.078263	1.02324	0.0241343	0.12449	0.234057	0.175287	0.618575	0.548625	0.0303118	0.374591	-0.117863	0.633222	0.897798	-0.0780425	0.491196	0.848938
NM_000640	IL13RA2	-2.19138	0.61092	0.662127	1.41285	0.0151631	0.104629	-12.1445	0.983916	0.995307	1.55885	0.00484485	0.0489504	0.407287	0.138724	0.35106	0.289915	0.126311	0.553824	0.42289	0.0690702	0.493499	0.202309	0.208394	0.638763	-0.0952984	0.510354	0.858124
NM_000641	IL11	0.404346	0.0455805	0.350599	1.75772	0.00403831	0.0489688	2.92169	0.000645653	0.00927072	0.543366	0.0961149	0.297478	-0.0159579	0.311796	0.551633	0.307442	0.112939	0.533143	0.349203	0.105613	0.562439	0.359981	0.078407	0.457442	0.600759	0.0260967	0.303805
NM_000642	AGL	-0.146061	0.123444	0.350599	1.70823	0.00493805	0.0551838	0.481538	0.026976	0.108899	0.666977	0.0709897	0.249637	3.1175	4.22e-06	0.000579124	-0.420624	0.905684	0.992645	-0.0568876	0.498168	0.866944	-0.00290775	0.476996	0.82634	-0.103825	0.519545	0.861791
NM_000643	AGL	-2.95326	0.74897	0.774842	0.764344	0.103579	0.312116	-10.9535	0.972853	0.99161	0.484229	0.110812	0.324761	-2.10811	0.939832	0.972627	0.343214	0.0892071	0.489756	0.19281	0.22366	0.707606	0.398795	0.0590191	0.417355	-0.600786	0.901404	0.989373
NM_000645		-0.834216	0.282089	0.419148	-0.119398	0.451225	0.679341	-2.79231	0.337218	0.541362	-0.861278	0.720083	0.890557	0.436126	0.129752	0.33835	0.2938	0.123285	0.549488	0.0606449	0.361985	0.802336	0.466825	0.0339887	0.339404	0.0229416	0.382419	0.788993
NM_000646	AGL	0.551903	0.0331211	0.350599	1.09136	0.0432589	0.192765	-1.06276	0.120187	0.283595	0.886392	0.0394429	0.175211	2.0596	0.000358874	0.00989221	0.655982	0.00591342	0.188064	0.151634	0.263779	0.741928	0.440043	0.042656	0.370395	0.959955	0.00187279	0.105106
NM_000651	CR1	0.189883	0.0699991	0.350599	0.520024	0.176042	0.412258	4.23372	4.79e-05	0.00178839	0.804468	0.0493391	0.201041	0.389537	0.144282	0.358135	0.0364345	0.420043	0.804627	0.275805	0.153857	0.636207	0.389509	0.0632684	0.428285	0.0577851	0.345335	0.762572
NM_000655	SELL	-4.01548	0.879941	0.890515	-1.59287	0.897762	0.954526	-10.276	0.965009	0.989641	-1.89614	0.957089	0.991724	-2.29693	0.951503	0.977657	0.270906	0.141812	0.57809	-0.110767	0.561076	0.894542	0.334171	0.0939351	0.481341	0.0142942	0.391368	0.79443
NM_000660	TGFB1	NA	NA	NA	NA	NA	NA	NA	NA	NA	NA	NA	NA	NA	NA	NA	0.598509	0.0105462	0.236093	0.778199	0.00490376	0.189791	0.690233	0.00372344	0.149542	0.757277	0.00880193	0.194982
NM_000661	RPL9	-0.437428	0.184222	0.357559	-0.0204627	0.404691	0.642077	-4.07756	0.53286	0.714792	0.656602	0.0728834	0.253719	1.69171	0.00188303	0.0277092	0.0329184	0.424941	0.80677	0.429407	0.0664687	0.486599	0.126867	0.297719	0.710601	0.284042	0.148798	0.57889
NM_000662	NAT1	-0.508245	0.200723	0.366043	0.544761	0.167549	0.401783	-5.82428	0.754152	0.873778	2.24186	0.000531828	0.013032	1.00468	0.0257946	0.129583	-0.108217	0.622286	0.902827	0.416717	0.0717559	0.498802	0.522896	0.0207248	0.283725	0.248609	0.17365	0.612252
NM_000663	ABAT	-0.872165	0.292038	0.426925	-0.486821	0.615488	0.79723	-2.03401	0.230334	0.42671	-1.17341	0.831241	0.946018	0.205578	0.212624	0.447218	0.673837	0.00489774	0.176167	0.301125	0.13589	0.608561	0.78543	0.00123044	0.0957122	0.133568	0.270254	0.704979
NM_000665	ACHE	0.116557	0.0799375	0.350599	-1.28984	0.851774	0.933906	2.44746	0.00156964	0.0168297	-0.713283	0.653504	0.852326	0.0218917	0.29384	0.534408	0.339231	0.0915877	0.494301	0.21882	0.200207	0.683574	0.440879	0.0423469	0.369775	0.148422	0.256428	0.692291
NM_000667	ADH1A	0.334557	0.0526738	0.350599	1.31645	0.0210913	0.12781	1.14097	0.0116058	0.0625676	-0.259532	0.419135	0.68287	-0.859654	0.709238	0.849906	0.416394	0.0522031	0.406264	0.784902	0.00464884	0.186594	0.146987	0.272275	0.692255	0.388792	0.0897396	0.482724
NM_000668	ADH1B	-0.742768	0.258539	0.402508	0.338584	0.243964	0.488401	-3.06174	0.378038	0.579527	-0.377312	0.481816	0.732037	0.129396	0.245033	0.484349	0.0525722	0.397636	0.796001	-0.217354	0.676179	0.932518	-0.180484	0.707873	0.92505	-0.240068	0.659928	0.919426
NM_000669	ADH1C	0.0847379	0.0845643	0.350599	1.65746	0.00602068	0.0612786	5.98022	2.28e-06	0.000329514	1.34628	0.0095604	0.0740189	0.524781	0.105011	0.30053	-0.176698	0.706095	0.933994	-0.0800851	0.525664	0.879583	0.352485	0.0826905	0.464497	0.24325	0.177482	0.614999
NM_000670	ADH4	-1.66211	0.493703	0.574211	1.69408	0.00525338	0.0573204	-5.84471	0.756233	0.875076	-1.58758	0.921091	0.982936	-0.91024	0.727093	0.860032	0.178767	0.234331	0.680467	0.292483	0.141822	0.618018	-0.464176	0.919461	0.989591	-0.173503	0.593098	0.892451
NM_000671	ADH5	-2.53341	0.677542	0.716561	0.467707	0.194575	0.433498	-10.3475	0.965983	0.989664	0.789505	0.0513121	0.205672	-1.04329	0.770196	0.884266	-0.0659746	0.564886	0.877607	-0.710212	0.95355	0.996533	0.134318	0.288279	0.703697	-0.310279	0.72277	0.939766
NM_000673	ADH7	-0.934624	0.308542	0.439557	-1.59488	0.898023	0.954546	-4.61792	0.609103	0.772273	0.941787	0.0337388	0.159173	1.53251	0.00353596	0.0394488	-0.439164	0.914557	0.994502	-0.279051	0.733846	0.951809	0.0903551	0.345995	0.748599	-0.18106	0.6008	0.894947
NM_000674	ADORA1	-0.567478	0.21495	0.373255	0.624782	0.141932	0.367804	-4.0762	0.532666	0.714749	0.174051	0.21279	0.472311	1.00746	0.025556	0.129035	0.0256218	0.435178	0.814179	-0.469261	0.868574	0.983463	0.104167	0.327482	0.734737	0.039298	0.364818	0.777375
NM_000675	ADORA2A	0.00343749	0.0971847	0.350599	-0.365906	0.564062	0.762184	1.30912	0.00927869	0.0543586	0.199304	0.202796	0.459311	-1.12877	0.794534	0.897952	0.154696	0.262657	0.699621	0.223696	0.195952	0.67918	-0.203365	0.73296	0.934041	0.513182	0.0451679	0.375938
NM_000676	ADORA2B	0.139177	0.0767783	0.350599	0.402926	0.218767	0.461985	-1.02693	0.116922	0.278506	0.398664	0.134323	0.362033	0.78205	0.0519016	0.197184	0.476985	0.0322287	0.347659	-0.00557351	0.438053	0.840601	0.595251	0.0102932	0.22354	0.499933	0.0488151	0.387838
NM_000678	ADRA1D	-1.54156	0.464495	0.55204	-0.835586	0.741477	0.874758	-4.81731	0.636087	0.791397	-0.355455	0.470063	0.724193	-0.157872	0.383562	0.617235	0.153952	0.263583	0.700437	-0.848824	0.975445	0.999863	-0.489182	0.929074	0.991591	-0.386518	0.783402	0.959487
NM_000679	ADRA1B	-0.806205	0.274883	0.413917	2.07224	0.00103428	0.0218476	1.7859	0.0045036	0.0333795	-0.365854	0.475724	0.72797	0.211525	0.210184	0.443813	-0.953358	0.995829	0.999859	-0.998846	0.988169	0.999863	-0.229854	0.7602	0.94332	-1.04276	0.985578	0.999781
NM_000681	ADRA2A	NA	NA	NA	NA	NA	NA	NA	NA	NA	NA	NA	NA	NA	NA	NA	0.0583014	0.389523	0.789792	0.294219	0.140645	0.61633	0.520104	0.0212889	0.286569	-0.105286	0.521084	0.86266
NM_000682	ADRA2B	-0.58323	0.218815	0.37537	1.19805	0.0313016	0.1601	-5.97937	0.769549	0.883402	0.776446	0.053139	0.209806	1.67196	0.00202658	0.0284933	0.159048	0.257539	0.697643	0.186586	0.229345	0.712523	0.276075	0.137235	0.553439	-0.0447243	0.454641	0.82883
NM_000683	ADRA2C	-0.411457	0.178286	0.354358	0.0267055	0.382769	0.622175	-0.556416	0.0789065	0.216026	0.805065	0.0492828	0.201035	0.0331164	0.28852	0.529351	-0.0989569	0.609859	0.897807	-0.0817046	0.527539	0.880487	-0.708042	0.977968	0.998765	-0.757123	0.948104	0.997236
NM_000684	ADRB1	-0.424173	0.18119	0.355914	-0.134899	0.458471	0.685337	-2.51878	0.29726	0.501019	-0.148759	0.361906	0.632252	1.10574	0.0184208	0.105717	0.173003	0.241073	0.687156	0.147858	0.267625	0.744745	0.0149512	0.451402	0.811019	-0.0596104	0.471093	0.837895
NM_000685	AGTR1	-1.9472	0.559032	0.622462	0.764588	0.103522	0.31208	-7.79167	0.898233	0.959824	-2.0987	0.971619	0.996105	1.337	0.0078319	0.0645838	0.279672	0.134521	0.567784	0.144621	0.271038	0.745929	0.411276	0.0536216	0.403528	0.293007	0.14279	0.570799
NM_000686	AGTR2	-0.191494	0.132102	0.350599	1.13398	0.038016	0.179859	-2.42822	0.284051	0.486737	0.227994	0.191794	0.44491	0.300266	0.175415	0.400146	0.564068	0.0147795	0.268841	0.311311	0.129051	0.599167	0.317743	0.105123	0.501192	0.369494	0.0991979	0.501058
NM_000687	AHCY	-0.173308	0.128614	0.350599	-0.119664	0.451368	0.679341	0.240296	0.0356113	0.130569	-1.04094	0.788968	0.926872	0.227081	0.203927	0.436291	0.36365	0.0774164	0.463227	0.296551	0.138964	0.61304	0.390203	0.0629633	0.42797	0.709869	0.0124572	0.225681
NM_000689	ALDH1A1	-2.50782	0.672838	0.712683	-0.0387765	0.413348	0.648828	-6.92329	0.847824	0.93264	-2.26795	0.979845	0.997917	-0.801258	0.687592	0.837947	0.114656	0.313146	0.737853	-0.111409	0.561809	0.894918	0.15117	0.267094	0.688709	-0.401799	0.794233	0.963452
NM_000691	ALDH3A1	0.163259	0.0735326	0.350599	0.544552	0.167629	0.401808	0.856986	0.0168691	0.0803738	0.118166	0.235932	0.500529	1.82529	0.00103018	0.0189008	0.234867	0.174404	0.61753	0.0956931	0.322819	0.781041	0.130619	0.292875	0.706879	0.19186	0.218184	0.662503
NM_000692	ALDH1B1	-1.34036	0.414009	0.515243	-0.421315	0.587823	0.77904	-5.41704	0.710209	0.844092	0.988065	0.0293861	0.145631	-0.511166	0.561973	0.754313	0.328549	0.0982157	0.507662	0.0931376	0.325595	0.781699	0.140928	0.279896	0.698239	0.146341	0.258231	0.69373
NM_000693	ALDH1A3	NA	NA	NA	-1.57838	0.895935	0.953934	NA	NA	NA	0.88867	0.0392114	0.174718	1.23527	0.011541	0.0808604	-0.346206	0.862123	0.980337	0.00304583	0.428105	0.835738	0.362624	0.0768334	0.454015	0.558164	0.0343607	0.340663
NM_000694	ALDH3B1	-0.175152	0.128959	0.350599	-0.118335	0.450716	0.678945	-0.48151	0.0738235	0.207472	0.408509	0.131268	0.357216	-0.509274	0.561123	0.753968	0.220006	0.189191	0.63077	-0.348941	0.791322	0.965537	-0.327668	0.843704	0.968366	-0.104925	0.520703	0.862627
NM_000695		-1.16709	0.369488	0.483112	0.368665	0.23175	0.475993	-3.46741	0.440422	0.636947	-0.520473	0.557965	0.788379	-1.04915	0.771931	0.88504	0.32671	0.0995265	0.509772	0.252686	0.171608	0.651991	0.339417	0.0905128	0.476082	-0.081764	0.495291	0.850553
NM_000696	ALDH9A1	0.126568	0.0785292	0.350599	1.64735	0.00626663	0.0627969	4.28653	3.88e-05	0.00153048	1.79804	0.00222117	0.0302291	-0.648241	0.624892	0.798091	0.294413	0.122835	0.549089	0.0406982	0.384432	0.813473	0.0682061	0.376461	0.766327	0.102954	0.299751	0.73127
NM_000697	ALOX12	-0.211248	0.135972	0.350599	0.674852	0.127103	0.347289	-1.46146	0.160713	0.34155	-0.446258	0.519006	0.761739	0.387874	0.144799	0.359022	0.493548	0.027875	0.331828	0.193203	0.223275	0.707235	0.307391	0.112458	0.513469	0.458254	0.0618845	0.423481
NM_000698	ALOX5	-1.11471	0.355791	0.472925	-0.439042	0.595465	0.78444	-3.76487	0.485994	0.675185	-0.556602	0.576373	0.802042	0.30167	0.174867	0.399402	-0.25053	0.784702	0.960674	-0.0413989	0.480213	0.858234	0.0625592	0.384319	0.771664	0.262275	0.163668	0.597387
NM_000699	AMY2A	-0.165587	0.127151	0.350599	-0.0862353	0.435694	0.668259	0.682517	0.0211833	0.0936032	-0.416353	0.503091	0.749563	-0.842276	0.702952	0.846776	0.0134527	0.452565	0.824176	-0.04791	0.487743	0.861887	0.115721	0.312	0.720199	0.247234	0.174664	0.613249
NM_000700	ANXA1	-0.0115639	0.0996359	0.350599	0.341296	0.242891	0.487599	5.16895	6.84e-06	0.000442243	-0.650195	0.623213	0.83325	-0.52756	0.569843	0.760011	0.0730248	0.368976	0.777696	-0.401737	0.828445	0.974443	0.381773	0.0669316	0.435154	-0.0993172	0.514709	0.859116
NM_000701	ATP1A1	0.43438	0.0427858	0.350599	0.653336	0.133245	0.35508	4.31787	2.97e-05	0.00120479	0.910042	0.0368588	0.168287	0.544513	0.0998197	0.291084	0.218976	0.190303	0.632966	-0.0375792	0.475745	0.856276	-0.00392869	0.478377	0.826502	1.56005	1.2e-05	0.0124233
NM_000702	ATP1A2	-3.40433	0.813386	0.830526	-0.366417	0.564264	0.762184	-11.4775	0.978098	0.993108	-1.63	0.927361	0.984175	-0.143365	0.376229	0.610464	-0.398201	0.893783	0.989472	-0.0891749	0.536616	0.883776	-0.548172	0.94793	0.995447	-0.349815	0.75523	0.952519
NM_000704	ATP4A	-1.35001	0.41648	0.516979	-0.463842	0.605868	0.790746	-3.63184	0.465726	0.658578	-0.355043	0.469844	0.723904	-0.949312	0.740475	0.868372	0.342393	0.089721	0.490352	0.558002	0.0283146	0.36489	0.198299	0.212678	0.641836	0.634714	0.0207954	0.27827
NM_000705	ATP4B	-1.20754	0.380036	0.490399	0.184485	0.31026	0.557064	-3.57377	0.456725	0.650975	-0.448753	0.52024	0.762539	-0.992124	0.754266	0.876538	-0.649195	0.973522	0.999859	-0.496932	0.882705	0.985186	-0.10506	0.616839	0.892729	-0.53827	0.874705	0.985005
NM_000706	AVPR1A	-0.315199	0.157277	0.350599	-1.67821	0.907926	0.959446	-0.629678	0.0840353	0.224793	1.77329	0.00239636	0.0313228	-0.72619	0.658044	0.819278	0.299335	0.118939	0.543076	-0.0724264	0.516754	0.87543	0.400056	0.058449	0.4159	0.392284	0.0881839	0.479414
NM_000707	AVPR1B	-0.681243	0.243094	0.391222	-0.613249	0.665438	0.829515	-2.43777	0.285477	0.488612	-0.159675	0.367508	0.637428	0.485722	0.115211	0.316025	0.34333	0.0891308	0.489497	0.475015	0.0500573	0.441523	0.501914	0.0250203	0.302552	0.672841	0.0161225	0.252146
NM_000710	BDKRB1	-0.113806	0.117484	0.350599	0.847857	0.0845018	0.27983	3.6559	0.000143732	0.00341801	1.91676	0.00149955	0.0240971	1.47136	0.00456192	0.0462901	-0.024909	0.507267	0.851076	-0.0935747	0.541584	0.884881	-0.103283	0.614402	0.891377	-0.233458	0.653439	0.916892
NM_000712	BLVRA	0.199446	0.068711	0.350599	0.981461	0.0592944	0.230431	2.97106	0.000593179	0.00879147	0.919412	0.0359182	0.165445	0.0433364	0.28385	0.52465	0.154922	0.262368	0.699621	0.214443	0.204153	0.687876	0.157017	0.2599	0.680889	0.271403	0.157182	0.588101
NM_000713	BLVRB	-1.30514	0.405155	0.508963	0.315816	0.253577	0.498517	-5.12797	0.675652	0.81938	-0.57466	0.58538	0.807916	0.166267	0.228837	0.466991	-0.029908	0.514481	0.853631	-0.12378	0.575994	0.9	0.469597	0.0331617	0.336417	0.568013	0.0322851	0.33173
NM_000714	TSPO	-1.30835	0.405975	0.509369	-0.126983	0.45483	0.682245	-4.56331	0.60166	0.766663	-0.664039	0.630002	0.837594	0.120936	0.24878	0.488171	-0.00683575	0.481313	0.837796	0.218764	0.200267	0.683644	-0.00796007	0.484124	0.828995	0.181549	0.227066	0.669998
NM_000715	C4BPA	-2.76586	0.718569	0.749419	-0.356373	0.559828	0.759063	-10.6533	0.9697	0.990635	-0.496367	0.545435	0.780375	0.442615	0.127863	0.335626	-0.26871	0.801632	0.965591	0.104398	0.313373	0.774375	-0.344504	0.855414	0.97215	-0.00641453	0.413217	0.80541
NM_000716	C4BPB	-2.24279	0.621352	0.670787	-2.31551	0.955381	0.982008	-2.68931	0.321729	0.525661	-0.282066	0.430898	0.693143	-3.68426	0.987714	0.994217	-0.245783	0.780358	0.959275	0.14263	0.273077	0.74758	-0.131342	0.649918	0.903616	-0.373035	0.77338	0.958122
NM_000717	CA4	0.254647	0.0618212	0.350599	1.30842	0.0216652	0.129814	-2.94219	0.359982	0.563282	1.17372	0.0166076	0.103105	1.47864	0.00444159	0.0455708	0.854853	0.000656377	0.0869975	0.750525	0.00613623	0.202115	0.931924	0.000220797	0.0548374	0.754469	0.00899865	0.197125
NM_000720	CACNA1D	-1.4694	0.44665	0.538934	1.13023	0.038468	0.18096	-4.17158	0.546521	0.725022	-0.583342	0.589927	0.811527	-2.2529	0.949069	0.976235	0.0784491	0.361539	0.772959	-0.255215	0.71235	0.944693	-0.144297	0.665864	0.910001	0.0741038	0.328841	0.751493
NM_000722	CACNA2D1	NA	NA	NA	NA	NA	NA	NA	NA	NA	NA	NA	NA	NA	NA	NA	0.422556	0.0497703	0.398649	0.391128	0.0834121	0.522165	0.291761	0.124385	0.53279	0.478441	0.0553147	0.407939
NM_000723	CACNB1	-0.0670154	0.109114	0.350599	2.24945	0.0004793	0.014814	-0.189277	0.0557725	0.17288	0.919469	0.0359161	0.165445	1.09392	0.0191871	0.108299	-0.00596255	0.480053	0.8373	-0.0327048	0.470155	0.854208	0.286481	0.12865	0.53974	-0.515876	0.863589	0.982614
NM_000724	CACNB2	0.146424	0.0758275	0.350599	1.49005	0.0113476	0.0879633	1.77937	0.00454923	0.033588	-0.385162	0.485989	0.735198	1.89348	0.000732525	0.015304	0.331976	0.0959977	0.503297	0.127732	0.288529	0.759076	-0.0693708	0.569295	0.873831	0.195358	0.215215	0.659729
NM_000726	CACNB4	-1.79106	0.523805	0.595595	-0.0728759	0.429293	0.662479	-7.98806	0.907085	0.964128	0.0453319	0.267848	0.536853	0.851374	0.0420305	0.174092	0.38083	0.0684319	0.446133	0.42557	0.0679702	0.490983	0.0823158	0.357017	0.753815	0.306993	0.13398	0.560455
NM_000727	CACNG1	-0.584243	0.21906	0.375585	-0.26121	0.51728	0.729475	-1.63561	0.180632	0.36745	2.80158	8.76e-05	0.0041537	-0.41117	0.512938	0.718813	-0.480584	0.931357	0.995721	-0.831551	0.973362	0.999863	-0.345312	0.85606	0.972411	-0.679525	0.928402	0.995856
NM_000728	CALCB	-0.232365	0.140184	0.350599	2.14605	0.000737869	0.0181041	2.60308	0.0011932	0.0139215	0.981631	0.0299513	0.147455	0.372912	0.149813	0.365438	-0.0368529	0.524006	0.857382	-0.190605	0.648439	0.923971	-0.119974	0.635765	0.898361	-0.582027	0.893841	0.987399
NM_000729	CCK	-0.32451	0.159263	0.350599	0.147788	0.326678	0.571272	2.53502	0.00133237	0.0150142	1.2508	0.0129975	0.089561	-0.324079	0.468734	0.686647	-0.113667	0.629241	0.905774	-0.712613	0.954005	0.996533	-0.0761935	0.57834	0.876916	-0.395565	0.789916	0.961755
NM_000730	CCKAR	-4.31093	0.904399	0.913122	-1.16935	0.827971	0.921263	-12.6915	0.987712	0.997294	-1.15587	0.826128	0.94433	-2.22703	0.947526	0.976055	0.79627	0.00124451	0.103965	0.151543	0.263886	0.742052	0.684255	0.0040165	0.155938	0.645609	0.0195248	0.271481
NM_000732	CD3D	-0.330899	0.160652	0.350599	0.934965	0.0672954	0.247076	-3.87837	0.503075	0.689895	1.29158	0.011475	0.0836472	0.328223	0.165027	0.385571	0.537384	0.0189547	0.287681	0.0777401	0.342741	0.791461	0.383343	0.0661388	0.432574	0.443811	0.0670352	0.436686
NM_000733	CD3E	-2.04636	0.580583	0.638311	-1.34329	0.861308	0.937741	-6.74531	0.835085	0.924884	0.104957	0.241486	0.507805	-0.201778	0.406045	0.636287	-0.309711	0.83543	0.974007	-0.687785	0.948742	0.996253	-0.0580826	0.553709	0.865854	-0.3464	0.752556	0.951425
NM_000737	CGB3	-0.129357	0.120352	0.350599	2.77562	4.41e-05	0.00422923	-0.848447	0.101242	0.254088	2.36505	0.000350381	0.0102197	-0.100835	0.354285	0.590961	-0.198424	0.731072	0.943341	0.306361	0.132267	0.603771	-0.280012	0.806361	0.957687	-0.34535	0.751759	0.951333
NM_000738	CHRM1	-5.94246	0.975623	0.977312	-5.92581	0.997559	0.999507	-12.0464	0.983147	0.995217	-0.793067	0.690211	0.874282	-5.00455	0.996751	0.999223	-0.0452305	0.536092	0.86267	-0.567507	0.912615	0.99053	0.124551	0.300726	0.713072	0.287632	0.146417	0.575791
NM_000739	CHRM2	-2.71777	0.710386	0.742863	-0.720189	0.703837	0.853025	-8.0875	0.911329	0.966062	-0.733559	0.663038	0.857905	-1.32984	0.842345	0.92592	-0.11959	0.636809	0.908561	-0.198602	0.656929	0.927883	-0.180734	0.708166	0.925128	-0.529575	0.870588	0.984391
NM_000740	CHRM3	-1.06762	0.343453	0.463637	-0.992702	0.786276	0.899745	-2.38337	0.277752	0.47954	-0.722798	0.657913	0.854596	-0.171611	0.39047	0.622999	-0.172739	0.701535	0.932343	-0.0527926	0.493449	0.864926	-0.147496	0.66977	0.911611	-0.102326	0.517969	0.860997
NM_000741	CHRM4	-2.1024	0.592435	0.647938	-2.56205	0.965411	0.986191	-4.09508	0.535472	0.716522	-0.459511	0.526068	0.766308	-1.29296	0.834437	0.920939	-0.197902	0.73052	0.94327	-0.100419	0.549265	0.888479	0.0248904	0.437309	0.803021	-0.11398	0.530521	0.86613
NM_000744	CHRNA4	0.156503	0.074421	0.350599	0.396351	0.221205	0.464754	7.6971	2.28e-06	0.000329514	0.254533	0.182017	0.431903	0.535626	0.102062	0.295206	0.170059	0.244407	0.688666	0.07876	0.341629	0.791056	0.215627	0.194131	0.625418	0.161565	0.244632	0.683614
NM_000745	CHRNA5	-0.112359	0.117213	0.350599	0.814558	0.0917628	0.292337	-0.420294	0.0697898	0.200158	1.7822	0.0023171	0.0307726	1.63432	0.00235801	0.0310249	-0.277027	0.808759	0.967506	-0.11833	0.569649	0.897963	0.362128	0.0771124	0.454908	-0.416206	0.804172	0.965179
NM_000747	CHRNB1	-0.256375	0.145034	0.350599	0.863524	0.0812939	0.27436	-2.24922	0.258884	0.458893	0.222109	0.194074	0.448136	1.53585	0.00349585	0.0392585	-0.108487	0.622631	0.902929	-0.559591	0.909568	0.990274	0.00715935	0.462506	0.817108	-0.364582	0.767041	0.956031
NM_000748	CHRNB2	-0.257576	0.145274	0.350599	0.996199	0.0570388	0.225698	0.179545	0.0379612	0.136224	1.95674	0.00131393	0.0219854	1.98787	0.000489757	0.0118426	-0.243979	0.77858	0.958643	0.0953326	0.323213	0.781084	-0.607853	0.962196	0.996692	-0.273803	0.690989	0.929384
NM_000749	CHRNB3	-0.242403	0.142222	0.350599	-0.0369082	0.412475	0.64828	-2.66043	0.317483	0.521772	0.460796	0.116933	0.33417	1.26694	0.0103187	0.0758965	-0.0016731	0.473937	0.834588	-0.146402	0.601218	0.908671	0.126344	0.298385	0.710921	0.180307	0.228142	0.670873
NM_000750	CHRNB4	0.395848	0.0464229	0.350599	0.974758	0.0603728	0.233085	1.05405	0.0130636	0.0679567	-0.271136	0.425058	0.687709	1.54025	0.00341986	0.038603	0.509974	0.024031	0.31545	0.247509	0.175831	0.655498	0.386649	0.0646414	0.430428	0.439261	0.0687835	0.441589
NM_000754	COMT	-3.08814	0.769814	0.792899	-3.76825	0.988375	0.996073	-4.63305	0.611189	0.773676	-2.99163	0.995435	0.99968	-0.959611	0.743929	0.870561	0.144461	0.27497	0.709861	0.601481	0.0207391	0.327591	0.132283	0.29082	0.705119	0.313891	0.129821	0.55555
NM_000756	CRH	0.0381033	0.0916848	0.350599	0.808854	0.0929736	0.294426	-3.85736	0.499922	0.687319	1.24699	0.0131747	0.0901434	1.95393	0.000574198	0.0131398	0.257568	0.153488	0.593655	0.0297585	0.397048	0.821008	-0.105642	0.617569	0.893132	0.540199	0.0383913	0.357096
NM_000758	CSF2	0.299797	0.0565258	0.350599	0.773147	0.101437	0.308927	1.07734	0.012694	0.0665985	1.1314	0.0189852	0.111961	0.455627	0.123799	0.329056	0.25155	0.159012	0.600809	0.199555	0.217456	0.701619	0.223116	0.186341	0.617987	0.524967	0.0420184	0.367981
NM_000760	CSF3R	-0.0363878	0.103776	0.350599	1.55805	0.0088292	0.076924	-1.48339	0.163241	0.344963	-0.25733	0.418017	0.681576	0.131072	0.244302	0.483652	0.0679804	0.375938	0.782088	-0.0684308	0.512179	0.8732	-0.133889	0.65317	0.905114	-0.0112118	0.418484	0.808451
NM_000761	CYP1A2	-0.665808	0.239197	0.388294	0.121728	0.33868	0.583018	-1.19718	0.132993	0.302157	-1.50346	0.907235	0.979211	-0.0843235	0.345942	0.583422	0.685764	0.00428552	0.165096	0.413357	0.073153	0.500776	0.701948	0.00328988	0.144274	-0.0529326	0.463632	0.834781
NM_000762	CYP2A6	0.251041	0.0622442	0.350599	1.21904	0.0292751	0.154233	-1.85771	0.207697	0.400287	1.30481	0.0109828	0.0809243	0.33803	0.161658	0.381349	0.509499	0.0241274	0.31545	0.450393	0.0585721	0.464502	0.362123	0.0771144	0.454908	0.374798	0.0965081	0.496299
NM_000764	CYP2A7	-0.500011	0.198734	0.365305	0.747126	0.107845	0.31877	-3.06223	0.378111	0.579598	-0.549629	0.572865	0.79959	0.864689	0.0402234	0.169237	0.203095	0.207012	0.650252	0.779554	0.00485358	0.189085	0.464685	0.0346973	0.341992	-0.0491942	0.459461	0.832567
NM_000766	CYP2A13	-1.05875	0.3411	0.462046	-0.937333	0.771446	0.89127	-2.73961	0.329267	0.533367	-0.179771	0.377805	0.646868	-0.378267	0.496069	0.706162	-0.0639569	0.562263	0.8764	-0.276256	0.731361	0.950892	-0.241756	0.771852	0.948033	0.15116	0.253935	0.690328
NM_000767	CYP2B6	NA	NA	NA	1.45923	0.0128023	0.094707	NA	NA	NA	NA	NA	NA	0.412066	0.137187	0.349165	-0.00377713	0.476996	0.836788	0.104334	0.313434	0.774446	-0.114	0.628107	0.896215	-0.165646	0.585117	0.88985
NM_000769	CYP2C19	-1.50338	0.45511	0.545501	-1.6818	0.908332	0.959446	-5.71409	0.742877	0.866239	1.88523	0.00165805	0.0253592	-0.502851	0.557996	0.751744	-0.628591	0.970166	0.999859	-0.556395	0.908452	0.99006	-0.510576	0.936651	0.993697	-0.714718	0.937977	0.996584
NM_000771	CYP2C9	-1.46127	0.444646	0.537311	0.424846	0.210389	0.453038	-5.3978	0.707937	0.842563	-0.825783	0.704806	0.882239	-0.046336	0.326854	0.565836	0.0230339	0.43903	0.816634	0.0952994	0.323251	0.781084	0.0453951	0.408461	0.786776	0.470564	0.0578258	0.415241
NM_000772	CYP2C18	NA	NA	NA	1.62096	0.00698979	0.067693	NA	NA	NA	1.20651	0.0149392	0.0967624	1.07255	0.0205487	0.11269	-0.618327	0.968379	0.999859	-0.684038	0.947863	0.996253	-0.713114	0.978603	0.998811	-0.74664	0.945717	0.997236
NM_000773	CYP2E1	-0.0260744	0.102034	0.350599	0.205151	0.301105	0.548619	0.739379	0.0196799	0.0890921	-1.44067	0.895595	0.974181	1.47404	0.00451337	0.0459797	-0.00552175	0.479449	0.8373	-0.169323	0.62619	0.916169	0.269127	0.143085	0.563994	-0.19858	0.618843	0.904455
NM_000774	CYP2F1	-0.676696	0.241968	0.390339	1.02765	0.0521575	0.214066	5.03566	6.84e-06	0.000442243	1.49316	0.00591894	0.0551171	0.667418	0.0718888	0.238532	-0.853755	0.992338	0.999859	-0.350802	0.792655	0.965591	-0.427455	0.903068	0.984618	-1.07477	0.987565	0.999781
NM_000775	CYP2J2	-2.33666	0.64023	0.685907	0.597462	0.150187	0.378959	-7.06418	0.857146	0.93787	-0.643184	0.619832	0.831031	-2.23672	0.948138	0.976174	0.552575	0.0165499	0.277293	0.210206	0.207825	0.691073	0.337502	0.091691	0.478186	0.421834	0.0755421	0.455069
NM_000777	CYP3A5	-0.0137399	0.100007	0.350599	2.30895	0.000376292	0.0133249	0.229079	0.0360493	0.131672	0.607638	0.0823583	0.272216	1.56319	0.00312854	0.0366891	-0.19013	0.721672	0.939825	-0.0413751	0.480191	0.858234	0.182672	0.230239	0.658758	-0.00612625	0.412876	0.805285
NM_000778	CYP4A11	NA	NA	NA	0.804764	0.0939259	0.295726	NA	NA	NA	-0.887752	0.730824	0.896099	-0.550225	0.580422	0.766401	-0.0993761	0.610397	0.897807	0.263409	0.163177	0.643338	0.164547	0.250715	0.674019	-0.248629	0.667875	0.921832
NM_000780	CYP7A1	-0.751119	0.26068	0.404063	-0.77795	0.723335	0.865169	-0.59384	0.0813568	0.220373	-0.633636	0.614981	0.827925	-0.999051	0.756352	0.877612	0.136534	0.284926	0.717197	-0.0336604	0.471265	0.854686	0.482608	0.0296731	0.32323	0.359183	0.104453	0.51138
NM_000781	CYP11A1	-0.122434	0.119089	0.350599	0.678035	0.126157	0.346256	-0.511066	0.0757741	0.210831	-0.0432442	0.309633	0.581773	-0.613462	0.609516	0.788374	-0.126637	0.645574	0.911592	0.320521	0.123064	0.59103	0.323744	0.100922	0.493402	-0.606225	0.903466	0.989816
NM_000783	CYP26A1	-0.176638	0.129238	0.350599	1.3402	0.0194495	0.121562	3.19739	0.000381004	0.00657767	-1.31775	0.869385	0.964006	-0.0978664	0.352781	0.589735	0.0974889	0.335784	0.755861	-0.0593382	0.501181	0.868007	-0.188541	0.716934	0.928232	-0.556163	0.882891	0.985464
NM_000784	CYP27A1	-0.130206	0.120519	0.350599	1.43145	0.0141583	0.100642	-1.85862	0.207795	0.400337	0.273881	0.174963	0.422477	0.968481	0.028959	0.139492	0.0222786	0.440132	0.817051	-0.331298	0.777819	0.962034	0.0442832	0.409948	0.787416	-0.256089	0.674688	0.924501
NM_000785	CYP27B1	-0.0156298	0.100311	0.350599	-0.0575721	0.422158	0.655951	3.83011	0.00010951	0.00292618	-0.3231	0.452711	0.710921	0.770527	0.0536622	0.201186	-0.0958981	0.605585	0.895439	-0.0734962	0.517996	0.876128	-0.106033	0.618117	0.893271	0.212908	0.200712	0.642111
NM_000786	CYP51A1	-0.867693	0.290841	0.425997	0.0838485	0.356187	0.598606	-4.5893	0.605342	0.769624	0.0541107	0.263835	0.532627	0.980574	0.0277705	0.135667	-0.313274	0.838308	0.974503	-0.206079	0.664669	0.929391	-0.107293	0.619739	0.89359	-0.554531	0.882136	0.985446
NM_000787	DBH	-0.0847349	0.112246	0.350599	0.613088	0.145493	0.372699	2.29295	0.001994	0.0195057	-0.553481	0.57479	0.801071	-0.148274	0.378682	0.612805	-0.0664568	0.565554	0.877667	-0.145137	0.599825	0.908317	-0.240067	0.770237	0.947644	0.112721	0.290271	0.721421
NM_000788	DCK	0.146012	0.0758828	0.350599	0.109595	0.344312	0.588234	2.59024	0.00122286	0.0141852	0.698271	0.0654941	0.237598	-0.757151	0.670748	0.827497	-0.105417	0.618556	0.901268	0.195106	0.22148	0.705696	-0.254847	0.784179	0.950683	0.749204	0.00935193	0.200791
NM_000789	ACE	-0.613404	0.226211	0.379962	-0.0634647	0.424922	0.658474	-0.513441	0.0759406	0.211113	-0.583006	0.589729	0.811527	-1.2937	0.834587	0.920953	0.148355	0.270281	0.70639	0.330502	0.116809	0.580889	0.280324	0.133793	0.54714	0.028652	0.376375	0.785782
NM_000790	DDC	-0.606545	0.224511	0.379339	1.43752	0.0138513	0.0992243	-2.043	0.231491	0.428002	-0.973509	0.764406	0.915125	-0.847194	0.704862	0.847927	-0.0727968	0.574358	0.881584	0.0808013	0.339315	0.78955	0.507401	0.023824	0.298272	-0.0556359	0.466685	0.836578
NM_000791	DHFR	-0.825358	0.27981	0.417748	-0.0380582	0.413039	0.648516	-4.16058	0.54494	0.724075	1.17094	0.0167432	0.103725	-0.27373	0.443026	0.666824	0.555376	0.0161344	0.275452	0.125239	0.291231	0.761011	0.0696709	0.37444	0.765426	-0.126276	0.543797	0.87221
NM_000793	DIO2	-0.3463	0.163957	0.350923	0.536853	0.17029	0.405284	-2.70866	0.324654	0.528889	0.325944	0.157194	0.39732	0.460664	0.122374	0.326928	-0.309015	0.834938	0.974007	0.166174	0.249215	0.727971	-0.318521	0.83717	0.966749	-0.230273	0.650275	0.916404
NM_000794	DRD1	-0.00656147	0.0988141	0.350599	2.15781	0.00070003	0.0175868	-0.279856	0.0611112	0.183958	-0.242361	0.410254	0.674376	0.807917	0.0480912	0.188831	-0.0687047	0.568748	0.879508	-0.0831474	0.529193	0.880943	0.304714	0.114517	0.516919	-0.179108	0.598788	0.894713
NM_000795	DRD2	-0.303985	0.154839	0.350599	-0.0123617	0.400882	0.63827	3.52275	0.000184798	0.00399968	0.117799	0.23609	0.500682	-1.72286	0.905042	0.956926	-0.387927	0.888121	0.988166	-0.233014	0.691326	0.936973	-0.294656	0.818507	0.960865	-0.300345	0.714193	0.937061
NM_000797	DRD4	0.556707	0.0327355	0.350599	0.683413	0.1247	0.343565	1.34394	0.00884065	0.0525864	-0.292286	0.436268	0.697547	0.734679	0.0596216	0.214073	0.14682	0.272216	0.707752	0.6248	0.017387	0.309439	0.539438	0.01774	0.267907	0.915769	0.00263356	0.116787
NM_000798	DRD5	-1.01399	0.329389	0.453674	-0.0732422	0.429442	0.662543	-2.79664	0.337873	0.542098	-0.111555	0.342983	0.614281	-1.07453	0.779352	0.889547	0.714005	0.00312331	0.145295	0.423557	0.0688032	0.492564	0.352747	0.0825159	0.464497	0.72171	0.0113893	0.217037
NM_000799	EPO	-0.226898	0.13909	0.350599	1.35469	0.0185203	0.117925	-5.13703	0.67682	0.820471	2.13774	0.000734132	0.0157913	0.737003	0.0592247	0.213179	-0.0431047	0.533049	0.861707	0.0484041	0.375853	0.810175	0.204023	0.206536	0.637128	-0.0625058	0.474235	0.840082
NM_000801	FKBP1A	-2.49082	0.669677	0.710207	-1.3324	0.859374	0.936637	-7.98352	0.906901	0.964128	0.657654	0.0726957	0.253488	-1.30503	0.83698	0.922251	0.259016	0.152135	0.59304	-0.446594	0.856071	0.980614	0.274804	0.138335	0.555425	-0.0880182	0.502236	0.853672
NM_000802	FOLR1	-0.2903	0.151993	0.350599	0.698666	0.12039	0.337508	0.57229	0.024334	0.101979	-0.541671	0.568781	0.796912	0.649298	0.0756168	0.245708	-0.0925658	0.601145	0.893349	-0.622867	0.931305	0.994194	-0.442358	0.910073	0.986589	-0.00341123	0.410026	0.803795
NM_000804	FOLR3	0.28567	0.058139	0.350599	0.226392	0.291694	0.539338	3.4095	0.00023499	0.00471645	2.17369	0.000638194	0.0144988	0.980261	0.0278022	0.135793	0.187625	0.224256	0.670001	0.367078	0.0956926	0.545548	-0.00816853	0.484437	0.828995	0.596143	0.0268153	0.306418
NM_000805	GAST	-0.784052	0.269186	0.410208	0.798215	0.0954017	0.298076	-4.64455	0.612738	0.774539	0.512914	0.103661	0.311437	0.197207	0.216076	0.451709	0.00328834	0.467058	0.831154	0.333819	0.114798	0.577641	0.164142	0.251185	0.674342	0.044608	0.359171	0.774098
NM_000806	GABRA1	-1.99978	0.570551	0.630751	-0.313833	0.540806	0.745885	-5.03777	0.664249	0.811231	0.17296	0.213219	0.472933	-2.82049	0.971717	0.987352	0.656005	0.00591141	0.188064	0.659378	0.0132199	0.277559	0.197361	0.213701	0.642534	0.450107	0.0647449	0.430676
NM_000807	GABRA2	-0.167449	0.127494	0.350599	1.42894	0.0142634	0.100813	2.16146	0.00243432	0.0220375	2.69007	0.000118879	0.00505793	1.32355	0.00830688	0.0668846	-0.332387	0.852333	0.977781	-0.00699446	0.439751	0.840601	-0.0695411	0.56953	0.873916	-0.260871	0.679127	0.925616
NM_000808	GABRA3	-0.697607	0.247208	0.39406	0.205565	0.300922	0.548472	-0.950991	0.109907	0.267392	-2.17487	0.975605	0.997244	0.129872	0.244794	0.484085	-0.166322	0.693964	0.929923	-0.183491	0.64111	0.920955	0.276376	0.136974	0.552997	-0.0131567	0.420636	0.810248
NM_000809	GABRA4	-0.0683737	0.109368	0.350599	0.231473	0.289518	0.537204	-0.0937288	0.0506803	0.163256	-0.26635	0.422691	0.686177	-0.14489	0.377103	0.611409	0.0885862	0.347854	0.763586	0.120435	0.296249	0.762833	0.0331803	0.425596	0.796249	0.32566	0.122599	0.543572
NM_000810	GABRA5	-0.58956	0.220359	0.376433	0.450542	0.200982	0.441235	-1.98861	0.224308	0.420528	0.224251	0.193283	0.446844	-1.04443	0.770578	0.884486	0.0421315	0.412372	0.801898	-0.0604565	0.502514	0.868242	-0.132743	0.651719	0.904711	-0.0115799	0.418854	0.808897
NM_000811	GABRA6	0.311607	0.0551719	0.350599	0.0714997	0.362134	0.604202	2.20066	0.00229743	0.0212243	2.52628	0.000202303	0.0071948	0.586208	0.0895601	0.272272	0.375699	0.0710273	0.45053	0.342326	0.109653	0.569013	0.196131	0.215105	0.643448	0.332271	0.11885	0.53904
NM_000812	GABRB1	-0.137743	0.121912	0.350599	0.347238	0.24052	0.485456	-1.86373	0.208366	0.401226	0.809512	0.0486404	0.200003	0.506254	0.109638	0.307126	0.050481	0.400583	0.797151	-0.222083	0.680886	0.933713	-0.186107	0.714275	0.927239	-0.193262	0.613442	0.901394
NM_000815	GABRD	NA	NA	NA	0.788162	0.0977982	0.30296	NA	NA	NA	0.745419	0.0576419	0.219402	-0.696169	0.645424	0.811596	-0.463988	0.924884	0.995131	-0.536171	0.900361	0.988823	-0.169361	0.695232	0.920496	-1.05252	0.986212	0.999781
NM_000816	GABRG2	-1.04017	0.336212	0.458713	0.936555	0.0669527	0.246343	-5.11529	0.674009	0.818475	0.536424	0.0978293	0.300698	-0.518385	0.565492	0.756926	0.236419	0.17297	0.615599	0.409936	0.0746383	0.503569	0.0377727	0.419137	0.793546	0.276111	0.154011	0.583237
NM_000817	GAD1	-0.0697843	0.109609	0.350599	0.967958	0.0614744	0.235533	-1.98081	0.223273	0.419469	0.355968	0.147577	0.381837	1.00563	0.0256933	0.129211	-0.393744	0.891409	0.988949	-0.135323	0.588987	0.903786	-0.0507971	0.543791	0.860326	0.300726	0.13782	0.56551
NM_000818	GAD2	-0.188947	0.131618	0.350599	0.590034	0.152667	0.382879	2.79278	0.000835014	0.011086	-0.526553	0.561116	0.791289	1.16054	0.0152458	0.0955985	-0.0707567	0.571546	0.880001	-0.448997	0.857359	0.980753	-0.194485	0.723405	0.930435	-0.0415483	0.451217	0.827468
NM_000820	GAS6	-1.04804	0.338275	0.460504	1.0924	0.0431643	0.192696	-5.54968	0.725342	0.853948	-1.54718	0.914645	0.981029	1.81228	0.00110406	0.019692	0.0560502	0.39272	0.791962	0.209878	0.20812	0.691073	0.464661	0.0347113	0.341992	0.299397	0.138703	0.566297
NM_000823	GHRHR	0.26991	0.0600115	0.350599	0.597919	0.150078	0.378853	0.515333	0.025979	0.106321	0.589911	0.0859435	0.279112	0.130137	0.244691	0.483963	-0.0463373	0.537661	0.863059	0.394769	0.0816337	0.518543	0.465934	0.0342577	0.34045	0.265275	0.161508	0.593842
NM_000826	GRIA2	-0.525587	0.204861	0.368257	-0.0656528	0.425969	0.659344	-4.91412	0.64854	0.800103	1.79719	0.00222951	0.0302291	1.08023	0.0200505	0.11089	-0.151395	0.676251	0.922184	-0.538242	0.901178	0.988828	-0.38035	0.878166	0.979372	-0.856601	0.966338	0.998589
NM_000828	GRIA3	-1.19253	0.376118	0.487691	-0.15455	0.467763	0.69158	-5.09137	0.670897	0.816036	0.326678	0.156948	0.396871	0.149131	0.236402	0.475403	-0.362472	0.872765	0.983226	-0.703634	0.952257	0.996533	0.0439209	0.410526	0.787859	-0.188858	0.609052	0.89937
NM_000829	GRIA4	0.377724	0.0481892	0.350599	1.84106	0.00284006	0.0400572	-1.76633	0.196404	0.386994	1.53857	0.00514518	0.0506179	0.784967	0.0514499	0.196358	0.468082	0.0347037	0.356534	0.0609601	0.361612	0.802173	0.387551	0.0641857	0.430252	0.594301	0.0271686	0.309
NM_000831	GRIK3	-0.27419	0.148661	0.350599	1.99154	0.00148204	0.0269005	0.141945	0.0395035	0.140053	0.640535	0.075797	0.259422	2.98916	4.22e-06	0.000579124	-0.0753304	0.577991	0.88344	-0.162332	0.618574	0.913285	-0.611104	0.962824	0.996692	-0.247992	0.667297	0.921761
NM_000833	GRIN2A	-1.74641	0.513477	0.587878	-2.26857	0.953098	0.981589	-1.83686	0.205124	0.397686	-0.44921	0.520489	0.762679	-2.431	0.957965	0.980672	0.0989718	0.333721	0.75442	0.0526237	0.371144	0.808577	-0.177529	0.704563	0.923744	0.056998	0.346142	0.763501
NM_000834	GRIN2B	0.164247	0.0734018	0.350599	0.00644635	0.392301	0.630538	0.784783	0.018635	0.085916	-0.931393	0.748176	0.906638	0.797154	0.0497083	0.192647	1.22266	1e-05	0.019049	0.914594	0.00139706	0.118218	0.572031	0.013019	0.24193	1.19522	0.000230837	0.0445254
NM_000835	GRIN2C	-0.294581	0.152885	0.350599	0.791933	0.0968648	0.300836	-1.38973	0.152897	0.33063	1.52112	0.00545385	0.05254	-2.10165	0.939403	0.972458	-0.554446	0.95423	0.998871	-0.125786	0.578208	0.900262	-0.22435	0.754773	0.942256	-0.169607	0.589047	0.891394
NM_000836	GRIN2D	-3.5797	0.83485	0.849492	-2.87553	0.974645	0.990694	-7.26142	0.869222	0.944426	-0.368289	0.477006	0.729065	-3.81355	0.989189	0.995019	0.00593177	0.46332	0.829248	0.243311	0.179305	0.658721	0.108263	0.322025	0.730195	0.599328	0.0262934	0.30415
NM_000837	GRINA	0.563842	0.0321967	0.350599	-0.920841	0.766669	0.888374	4.2523	4.56e-05	0.00174147	0.564113	0.0913848	0.288854	0.59172	0.0881985	0.269734	0.323073	0.101913	0.513461	0.962956	0.00089725	0.100887	0.634986	0.00690894	0.195369	0.334354	0.117591	0.536507
NM_000839	GRM2	-0.899487	0.299205	0.432051	0.999149	0.0565763	0.224563	-3.27923	0.411489	0.61011	-0.95733	0.758339	0.911911	-0.360538	0.487163	0.699618	0.153394	0.264283	0.701434	0.368982	0.0946468	0.542721	-0.116893	0.631915	0.897611	0.25636	0.167923	0.603633
NM_000840	GRM3	-0.2137	0.136466	0.350599	0.221538	0.293865	0.541222	-0.151428	0.0537831	0.169302	-0.351424	0.467901	0.722349	-0.573485	0.591308	0.774827	-0.142917	0.665876	0.918004	0.03339	0.392855	0.819149	0.0187985	0.445948	0.807462	0.138441	0.265706	0.701522
NM_000842	GRM5	-0.614799	0.226558	0.380103	1.52598	0.00989502	0.0815624	-5.12072	0.674726	0.81876	0.363384	0.145183	0.37818	0.772167	0.0534068	0.200735	-0.0948562	0.604184	0.894922	-0.247072	0.704887	0.941507	-0.0790236	0.582099	0.877919	0.0898861	0.312887	0.741165
NM_000843	GRM6	-1.80106	0.526039	0.597283	-0.35366	0.558681	0.758325	-7.13435	0.861689	0.940359	-0.177624	0.376697	0.646125	0.461401	0.122156	0.326618	0.207808	0.201994	0.646653	-0.461926	0.8646	0.982123	-0.291268	0.815783	0.959947	0.0543666	0.34891	0.766182
NM_000844	GRM7	-0.410997	0.178193	0.35429	-0.09727	0.440962	0.672586	3.05067	0.00049964	0.00781389	1.43068	0.00732672	0.0631099	-0.555366	0.582805	0.768403	-0.601444	0.965126	0.999859	-0.344849	0.788197	0.964881	-0.459766	0.917593	0.988771	-0.23793	0.657839	0.918629
NM_000845	GRM8	-0.0873678	0.1127	0.350599	1.52956	0.00979411	0.0812236	0.874284	0.0165064	0.0793987	0.979787	0.0301161	0.147962	-0.558187	0.584101	0.769276	-0.10106	0.612645	0.897807	-0.241177	0.699243	0.939717	-0.0457457	0.537027	0.856909	0.0385122	0.365653	0.778017
NM_000847	GSTA3	-0.518818	0.203222	0.367179	-1.16145	0.826231	0.920613	0.67319	0.0214754	0.0945457	-0.595201	0.595867	0.815112	-0.991809	0.754182	0.876538	-0.189621	0.72105	0.939825	-0.0681472	0.511798	0.872927	0.177189	0.236389	0.662597	-0.675092	0.927114	0.995475
NM_000849	GSTM3	-1.29959	0.403715	0.507866	-0.476704	0.611267	0.794419	-3.99429	0.520417	0.705359	-0.43306	0.512023	0.756426	-0.294282	0.453638	0.675209	-0.137541	0.659372	0.916327	0.162466	0.252786	0.731318	0.0606527	0.386941	0.773784	0.331761	0.11914	0.53984
NM_000850	GSTM4	-0.00380068	0.0983587	0.350599	-0.623536	0.669235	0.831903	2.62294	0.00115442	0.0137005	-0.862	0.720342	0.890557	-1.15261	0.800933	0.902131	0.0411426	0.413678	0.802349	0.528894	0.0349325	0.393157	0.37835	0.0685816	0.43683	0.746404	0.00955266	0.202365
NM_000851	GSTM5	-1.88017	0.543977	0.611179	-0.573144	0.65004	0.820597	-9.09377	0.943883	0.9827	0.780953	0.0525196	0.208219	1.36529	0.00696215	0.0598195	0.36216	0.0782354	0.465897	0.130262	0.285769	0.757329	0.249543	0.160399	0.586811	0.604512	0.0254664	0.300293
NM_000852	GSTP1	NA	NA	NA	NA	NA	NA	NA	NA	NA	NA	NA	NA	NA	NA	NA	0.10789	0.321906	0.745385	0.453524	0.0573899	0.462334	0.325461	0.0997441	0.491981	0.400035	0.0847234	0.472889
NM_000853	GSTT1	-0.177656	0.129438	0.350599	0.775372	0.100867	0.308209	1.95889	0.00345185	0.0279205	0.336019	0.154001	0.392285	2.26309	0.000158327	0.00619284	-0.330419	0.850938	0.977415	-0.491092	0.879879	0.985082	0.406167	0.0557874	0.409516	-0.29528	0.709821	0.934923
NM_000854	GSTT2	-1.46837	0.446409	0.538818	-0.726693	0.705941	0.854479	-2.42963	0.284238	0.486922	-1.99572	0.964903	0.99432	-0.721453	0.655945	0.817546	-0.125901	0.644641	0.911448	-0.0511849	0.491554	0.863222	-0.0069128	0.482618	0.828088	0.700623	0.0133484	0.234142
NM_000857	GUCY1B1	-6.13107	0.979361	0.980666	-5.23899	0.996185	0.998867	-11.4232	0.977601	0.992867	-3.06633	0.99611	0.99968	-4.79578	0.996031	0.998849	-0.137633	0.659485	0.916327	0.249659	0.173996	0.654632	-0.267962	0.795921	0.954149	0.892289	0.00318556	0.127817
NM_000861	HRH1	NA	NA	NA	2.98921	4.2e-06	0.000660346	NA	NA	NA	3.42797	1.46e-05	0.00129704	3.0773	4.22e-06	0.000579124	0.0580332	0.389898	0.790019	-0.159243	0.615329	0.913065	-0.262589	0.79106	0.95261	-0.293326	0.708109	0.934417
NM_000862	HSD3B1	-0.16061	0.126157	0.350599	0.580014	0.155915	0.386932	-3.62169	0.464147	0.657524	0.729091	0.0602864	0.226347	1.67015	0.00203925	0.0285565	0.0763407	0.364376	0.7743	0.0654901	0.356574	0.799365	0.199061	0.211813	0.64085	-0.129716	0.54749	0.874582
NM_000863	HTR1B	0.400951	0.0459069	0.350599	-0.0165814	0.402849	0.640291	3.34709	0.000273775	0.00523799	-1.86158	0.953992	0.991199	1.67303	0.00200969	0.0283771	0.509839	0.0240712	0.31545	0.335612	0.113668	0.575126	0.0869874	0.350517	0.749825	0.671365	0.0163031	0.25353
NM_000864	HTR1D	-2.08203	0.58815	0.644309	-5.34462	0.99647	0.99898	1.41328	0.00791894	0.0489217	-1.3751	0.882095	0.969109	-3.02167	0.976777	0.989675	0.424479	0.0490416	0.396832	0.389786	0.0840966	0.523548	0.126362	0.298369	0.710921	-0.116542	0.533237	0.867411
NM_000865	HTR1E	NA	NA	NA	1.14089	0.037255	0.177569	NA	NA	NA	-1.48069	0.903109	0.977416	1.8213	0.00104918	0.0191125	0.0731575	0.368768	0.777431	0.0944698	0.324178	0.781503	0.0116412	0.456127	0.813226	-0.125593	0.543062	0.872021
NM_000866	HTR1F	0.097792	0.0826366	0.350599	0.760111	0.104668	0.313964	0.811793	0.0179779	0.0839906	0.196907	0.203755	0.46009	1.49191	0.00423049	0.0444945	0.338014	0.0922863	0.495558	-0.0854792	0.532005	0.881304	0.371647	0.0720983	0.443471	-0.233015	0.653037	0.916889
NM_000867	HTR2B	0.253571	0.061945	0.350599	1.71106	0.0048897	0.0548292	2.81784	0.000809918	0.0109532	0.606563	0.0825377	0.272633	0.633254	0.0788172	0.250946	0.108822	0.320732	0.744852	0.0820004	0.338004	0.788976	0.349521	0.084487	0.467738	0.473939	0.0567599	0.412711
NM_000868	HTR2C	0.016914	0.0950428	0.350599	0.668978	0.128877	0.349619	-0.830022	0.0996792	0.251738	0.89003	0.0390445	0.174377	-0.66133	0.630491	0.802266	-0.164985	0.692338	0.929146	0.00387182	0.427185	0.835529	-0.122349	0.638748	0.899365	0.417287	0.0773767	0.458644
NM_000869	HTR3A	0.0709047	0.0866426	0.350599	-0.0553246	0.421132	0.65514	-1.37051	0.1508	0.327635	0.912735	0.0366148	0.167725	1.06127	0.0212897	0.115029	0.328825	0.098023	0.507551	0.252971	0.171401	0.651909	0.158011	0.258662	0.679218	-0.456189	0.829883	0.974086
NM_000870	HTR4	-0.232328	0.140178	0.350599	0.853093	0.0834444	0.278124	-0.828903	0.099588	0.251565	-1.13727	0.820553	0.942163	1.56452	0.00311165	0.0365902	0.0475899	0.404601	0.798968	-0.771862	0.964809	0.999258	0.0167308	0.448858	0.808929	-0.221773	0.641945	0.913206
NM_000871	HTR6	-0.561382	0.213483	0.372244	1.10157	0.041964	0.189824	-4.01623	0.523666	0.708239	-0.35801	0.471471	0.725295	1.02714	0.0238166	0.12351	0.69631	0.00377969	0.154589	0.307881	0.131225	0.602043	0.291269	0.124756	0.533401	0.72852	0.0108433	0.212259
NM_000873	ICAM2	-0.00436115	0.0984509	0.350599	1.54691	0.00919288	0.0784488	-1.0619	0.120117	0.283583	0.154026	0.220967	0.482694	1.09163	0.0193032	0.108546	0.15933	0.257149	0.697481	-0.145443	0.600158	0.908317	-0.0401695	0.529363	0.854537	0.00883777	0.397018	0.797527
NM_000874	IFNAR2	-0.731749	0.255751	0.400706	-0.0216674	0.4053	0.642558	-1.56261	0.172193	0.356683	0.0963647	0.245123	0.511465	-1.43908	0.863275	0.935848	-0.650307	0.973701	0.999859	-0.209127	0.667865	0.930127	-0.600898	0.96079	0.996692	-0.514005	0.862593	0.982614
NM_000875	IGF1R	-1.31693	0.408135	0.510983	-2.3025	0.954738	0.982008	0.730038	0.019924	0.0897249	-2.66748	0.991193	0.99968	-1.02776	0.765499	0.882472	0.321661	0.102883	0.515282	0.119399	0.297335	0.764182	0.185148	0.227407	0.655636	0.0214037	0.383997	0.78963
NM_000876	IGF2R	0.098307	0.0825602	0.350599	0.89962	0.0740119	0.260645	-0.194771	0.0560965	0.173558	-0.792193	0.689827	0.873987	0.480572	0.116628	0.317943	0.367733	0.0752606	0.458307	0.397507	0.0804193	0.516079	0.365031	0.0754785	0.450018	0.776052	0.00772001	0.182837
NM_000877	IL1R1	-1.28175	0.399133	0.504412	1.04618	0.049412	0.207121	-7.29864	0.871526	0.945691	0.700538	0.0651312	0.236978	0.424914	0.133083	0.343267	0.186036	0.226003	0.672195	-0.5758	0.915634	0.990965	-0.697092	0.976581	0.99848	-0.416924	0.804657	0.965413
NM_000878	IL2RB	-0.231418	0.139994	0.350599	0.388425	0.224182	0.4679	1.01542	0.0137777	0.0704443	0.564521	0.0912784	0.288596	1.74075	0.00149672	0.0237537	-0.0208948	0.501545	0.847994	-0.102057	0.551138	0.88981	-0.579736	0.956057	0.996305	-0.222986	0.643019	0.913372
NM_000879	IL5	-2.33351	0.639591	0.685425	-0.268317	0.520448	0.73161	-9.50743	0.952854	0.985734	0.755213	0.0561381	0.216558	-0.313497	0.463131	0.682097	-0.0270883	0.510322	0.851674	-0.0682109	0.511872	0.872927	0.100523	0.332382	0.739059	0.541114	0.0381645	0.356758
NM_000882	IL12A	NA	NA	NA	0.124844	0.337265	0.581797	NA	NA	NA	6.58294	2.09e-06	0.000718232	-0.647709	0.624643	0.79796	-0.0253483	0.50791	0.851399	-0.0294989	0.466327	0.852352	-0.168646	0.694395	0.920313	-0.0567829	0.468048	0.83725
NM_000884	IMPDH2	0.0969539	0.0827546	0.350599	0.388877	0.224001	0.467692	-1.24656	0.137802	0.309252	0.698782	0.0654128	0.237513	0.775597	0.05286	0.199493	0.129573	0.293776	0.724391	-0.142808	0.597225	0.907293	0.249812	0.160146	0.586247	0.151238	0.253849	0.690328
NM_000885	ITGA4	-1.50969	0.456677	0.546798	0.774584	0.101059	0.308505	-5.82019	0.753771	0.873687	-0.445025	0.518368	0.761251	-0.548126	0.579495	0.766007	-0.0913777	0.599499	0.892757	0.316582	0.125491	0.594712	0.371433	0.0721986	0.443616	0.355574	0.106344	0.514479
NM_000887	ITGAX	0.103636	0.0817863	0.350599	0.956047	0.0634252	0.238768	-0.431359	0.0705678	0.201761	-0.194359	0.385294	0.653467	0.0842154	0.264957	0.504988	0.931609	0.000252916	0.0566079	0.699525	0.00945826	0.238466	0.232323	0.177129	0.606647	0.295297	0.141313	0.569051
NM_000889	ITGB7	-1.85249	0.537766	0.606183	-0.385059	0.572271	0.768442	-4.99481	0.658787	0.807425	-0.456124	0.524283	0.765317	-1.57397	0.885287	0.946925	0.406547	0.0561755	0.416393	0.186725	0.229236	0.712523	0.0844688	0.353986	0.751669	0.453542	0.0634642	0.427025
NM_000890	KCNJ5	-1.23605	0.387293	0.495482	1.21395	0.0297229	0.154978	-4.49915	0.592965	0.759834	-0.926039	0.746015	0.905277	-0.732957	0.660864	0.821056	0.134205	0.28782	0.72014	-0.012992	0.446718	0.843792	0.394357	0.0610283	0.422525	-0.134053	0.552242	0.877105
NM_000891	KCNJ2	-1.58224	0.474471	0.55957	-0.839587	0.742759	0.875468	-4.4525	0.586447	0.755468	-0.684745	0.639979	0.8437	-0.352134	0.482911	0.696601	-0.723397	0.982882	0.999859	-0.155485	0.611202	0.912082	-0.946344	0.994149	0.999918	-0.832898	0.962624	0.998506
NM_000892	KLKB1	0.454923	0.0409419	0.350599	2.29126	0.000405723	0.0138365	1.54052	0.00649075	0.042373	-0.411706	0.500546	0.747804	0.384647	0.145863	0.360275	0.0910464	0.344566	0.76208	0.936529	0.00114816	0.109796	0.176897	0.236674	0.662649	0.615219	0.0237662	0.293216
NM_000893	KNG1	-0.24091	0.14191	0.350599	0.461388	0.196942	0.436576	-1.87675	0.210011	0.403422	0.590361	0.0858371	0.278883	-0.138637	0.373839	0.608314	0.0141354	0.451626	0.82371	0.0196936	0.408881	0.826187	0.0497925	0.40209	0.782816	-0.139195	0.557796	0.879434
NM_000894	LHB	-0.103746	0.115646	0.350599	0.387534	0.224495	0.468073	-1.33322	0.146721	0.321601	-0.690211	0.642495	0.845334	1.22091	0.0122144	0.083398	0.169962	0.244522	0.688666	0.0916103	0.327398	0.782193	0.208504	0.201678	0.63222	0.118183	0.285056	0.717936
NM_000895	LTA4H	-0.0704052	0.109711	0.350599	0.888818	0.0761582	0.264452	-0.306787	0.0627926	0.187487	-0.168457	0.372034	0.64206	-0.238528	0.424976	0.651271	-0.165212	0.692583	0.929146	0.248155	0.175263	0.655364	0.0206354	0.443359	0.806432	-0.3852	0.782505	0.959435
NM_000898	MAOB	0.504695	0.0367955	0.350599	2.52342	0.000132438	0.00747611	-1.97992	0.223172	0.419428	0.934823	0.0344208	0.161112	0.777661	0.0525624	0.198703	0.457932	0.0377006	0.364304	0.122939	0.293573	0.761455	0.672489	0.00462068	0.165848	0.765418	0.00832219	0.189304
NM_000902	MME	-0.462555	0.189916	0.360357	2.60487	9.25e-05	0.00639389	0.587829	0.0238846	0.100957	-1.7082	0.93772	0.986946	1.4569	0.00484269	0.0479565	-0.56521	0.956924	0.9995	-0.0711466	0.515304	0.875116	-0.306716	0.828146	0.964713	-0.907149	0.973092	0.999781
NM_000903	NQO1	-0.403236	0.176442	0.353652	2.38017	0.000264876	0.0107477	-2.57162	0.305058	0.509291	3.30142	2.29e-05	0.00171603	-0.338328	0.475928	0.691823	-0.167108	0.694881	0.930216	-0.822715	0.972235	0.999863	-0.393924	0.885762	0.980752	-0.229196	0.649155	0.915812
NM_000904	NQO2	-0.38963	0.173427	0.352396	2.03033	0.00124029	0.0242266	-4.33573	0.570232	0.743948	0.672946	0.069851	0.24698	0.0739426	0.269508	0.510042	0.537908	0.0188623	0.287355	-0.0995224	0.548246	0.887865	0.233728	0.175793	0.60525	0.159581	0.246412	0.684317
NM_000905	NPY	NA	NA	NA	0.559441	0.162729	0.395607	NA	NA	NA	0.0346496	0.27283	0.542803	-0.234811	0.422994	0.649572	0.314579	0.107819	0.523157	-0.0750125	0.519755	0.876955	-0.0322501	0.518335	0.848438	-0.130843	0.548727	0.875387
NM_000906	NPR1	0.0348601	0.0921924	0.350599	1.07945	0.0449449	0.196309	0.104893	0.0412077	0.143833	-1.27352	0.858475	0.959006	2.01445	0.00043276	0.0108103	-0.0483092	0.540359	0.864076	0.0420722	0.382897	0.812243	0.0800612	0.36014	0.755689	0.0656165	0.337298	0.756431
NM_000909	NPY1R	-1.04473	0.337404	0.459645	-0.327577	0.547024	0.75065	-3.06341	0.378286	0.579719	-1.10866	0.811545	0.937998	0.320723	0.167788	0.389652	-1.14571	0.998693	0.999859	-0.493128	0.880897	0.985082	-0.275593	0.802569	0.956655	-0.56716	0.887672	0.986276
NM_000910	NPY2R	-2.71265	0.709518	0.742121	-0.0834102	0.434294	0.666898	-8.72629	0.934121	0.978409	-0.402438	0.495528	0.743437	-1.63845	0.894535	0.951624	-0.0743493	0.576594	0.883013	-0.126371	0.578913	0.900398	0.136653	0.285266	0.702432	-0.160651	0.579856	0.887571
NM_000911	OPRD1	NA	NA	NA	0.696204	0.121084	0.338262	NA	NA	NA	0.742929	0.0580277	0.220328	-0.807399	0.689825	0.839343	-0.13715	0.658846	0.916137	-0.0681994	0.511856	0.872927	-0.193689	0.722496	0.930331	-0.609287	0.904606	0.990254
NM_000912	OPRK1	-2.21697	0.616111	0.666602	-0.236838	0.506201	0.721698	-9.19682	0.946265	0.983274	0.669907	0.0704224	0.248327	-0.104118	0.35591	0.592772	0.224054	0.18509	0.628558	0.256958	0.168177	0.648818	-0.0695126	0.569482	0.873916	1.1089	0.000523901	0.0627755
NM_000913	OPRL1	-1.87505	0.542822	0.610382	0.17915	0.312602	0.558879	-8.27489	0.918769	0.970041	-1.22599	0.845997	0.952928	1.82154	0.00104707	0.0190891	-0.335145	0.854282	0.978225	0.00154072	0.429907	0.836747	-0.147494	0.669766	0.911611	-0.176842	0.59643	0.893609
NM_000914	OPRM1	-1.10863	0.354201	0.471711	0.612202	0.14576	0.373049	-3.9065	0.507358	0.693958	-0.71859	0.656009	0.853239	-0.421633	0.518037	0.723274	0.171648	0.242655	0.688174	0.481721	0.0479697	0.433922	-0.153932	0.677472	0.913994	0.0940299	0.308736	0.738285
NM_000915	OXT	-0.12306	0.1192	0.350599	0.673833	0.127374	0.347531	5.32263	6.84e-06	0.000442243	-0.833859	0.708368	0.884335	-0.166588	0.387993	0.620854	-0.100463	0.61181	0.897807	-0.209625	0.668323	0.930127	0.145176	0.274535	0.694629	-0.327327	0.737281	0.94518
NM_000916	OXTR	-0.378621	0.171007	0.351978	1.53869	0.00947878	0.0800169	-3.23004	0.404071	0.603894	-0.135988	0.355395	0.625752	0.645728	0.0763219	0.246955	-0.414251	0.902409	0.991463	-0.145208	0.599895	0.908317	-0.342368	0.853969	0.971568	-0.612659	0.905852	0.990753
NM_000918	P4HB	0.00670555	0.0966696	0.350599	0.0489885	0.372473	0.613341	-0.240666	0.0587727	0.179238	-0.233433	0.405616	0.671081	0.451933	0.124983	0.331009	0.140538	0.279815	0.713754	0.327438	0.118672	0.583933	-0.0983169	0.608005	0.888643	0.515035	0.0446299	0.375743
NM_000921	PDE3A	-2.61805	0.692933	0.7289	-0.209933	0.493727	0.712448	-8.6522	0.931967	0.977066	0.0473845	0.266869	0.535442	-1.65744	0.896936	0.952707	-0.122571	0.64056	0.910341	0.601666	0.020715	0.327591	0.521454	0.021048	0.285677	0.517019	0.0441301	0.373909
NM_000922	PDE3B	-0.262762	0.146332	0.350599	0.96685	0.0616636	0.236023	-0.199021	0.0563566	0.174226	0.299585	0.166031	0.409751	0.822103	0.0459612	0.18359	-0.538452	0.950003	0.998693	-0.424856	0.843337	0.978127	-0.192578	0.721256	0.929652	0.104838	0.297843	0.729163
NM_000923	PDE4C	-0.720539	0.252909	0.398623	-0.200131	0.489294	0.709145	-3.6483	0.468242	0.660257	2.84525	7.3e-05	0.00367165	-1.87897	0.921307	0.96487	-0.211298	0.745179	0.947278	0.191031	0.225248	0.708854	-0.513615	0.937657	0.993913	0.0971835	0.305589	0.736282
NM_000924	PDE1B	-0.60111	0.223202	0.378204	-0.162049	0.471304	0.694453	-0.118183	0.0519671	0.165781	0.562625	0.0917748	0.289455	0.923925	0.0333521	0.151262	-0.733756	0.983904	0.999859	-0.784332	0.966826	0.999466	-0.423757	0.901276	0.984202	-0.462594	0.833622	0.974964
NM_000925	PDHB	-0.12482	0.119509	0.350599	0.184136	0.310409	0.557164	1.43941	0.00757673	0.0473235	0.981274	0.0299993	0.147617	0.577937	0.0914896	0.276269	0.378168	0.0697446	0.448334	-0.361647	0.800656	0.968302	-0.116703	0.631644	0.897611	-0.399096	0.792375	0.963068
NM_000926	PGR	-0.635098	0.231526	0.383065	0.539955	0.169271	0.403731	-2.33056	0.270166	0.471611	-0.913945	0.741312	0.902297	0.164162	0.229738	0.468131	0.614615	0.00893436	0.221691	0.501299	0.0421988	0.41605	0.156554	0.260527	0.681475	0.0372344	0.366979	0.778695
NM_000927	ABCB1	0.406322	0.0453954	0.350599	1.08792	0.0437319	0.193472	-0.385043	0.0676498	0.196288	3.64719	8.34e-06	0.000903943	0.14735	0.237167	0.476004	0.452219	0.0394509	0.370096	0.367158	0.0956565	0.545548	0.0121814	0.455259	0.81278	0.793729	0.00677056	0.172959
NM_000928	PLA2G1B	-0.278499	0.14954	0.350599	0.440397	0.204667	0.445882	-1.63469	0.180548	0.367312	-0.938791	0.751146	0.908287	1.01908	0.0244879	0.12555	0.0389816	0.416601	0.803824	-0.295819	0.748441	0.955084	0.368816	0.0735776	0.445541	-0.106513	0.522389	0.86325
NM_000929	PLA2G5	-0.353134	0.165486	0.351115	0.118594	0.340109	0.583999	-3.37878	0.42708	0.624801	0.864553	0.0418247	0.181566	0.9831	0.0275742	0.135109	0.56092	0.0152914	0.271249	1.13204	0.000158574	0.0448212	0.569626	0.0133281	0.242824	0.657022	0.0180294	0.261751
NM_000932	PLCB3	0.0221495	0.0942172	0.350599	0.836136	0.0870854	0.284509	-1.45096	0.159588	0.339747	0.153069	0.221368	0.483295	0.550353	0.0982618	0.288415	-0.206576	0.740127	0.946109	-0.127903	0.580589	0.900838	0.388233	0.0638886	0.42993	0.230707	0.18685	0.627106
NM_000933	PLCB4	-0.126041	0.119741	0.350599	0.7501	0.107107	0.317295	-2.29683	0.265436	0.466562	0.360001	0.146322	0.379817	0.682559	0.0690452	0.232716	0.416555	0.0521509	0.406264	-0.108587	0.558667	0.893635	0.136305	0.285685	0.702432	-0.113914	0.530475	0.86613
NM_000935	PLOD2	-0.382201	0.17178	0.35217	0.430237	0.208426	0.450747	0.406634	0.0295266	0.116058	0.0791661	0.252531	0.519951	-0.595404	0.601287	0.782253	-0.105238	0.618295	0.901214	-0.467885	0.867819	0.983279	-0.386443	0.881701	0.980242	-0.569239	0.888471	0.98629
NM_000936	PNLIP	0.379532	0.0480097	0.350599	-0.42747	0.590504	0.7808	3.99723	7.76e-05	0.00231015	0.0426969	0.269134	0.538256	-0.93408	0.735368	0.865069	0.281409	0.133052	0.566216	0.153307	0.262079	0.740695	0.14268	0.277721	0.69724	0.940732	0.0021779	0.110611
NM_000937	POLR2A	-0.682002	0.243291	0.391395	1.98315	0.00154721	0.0274363	1.55751	0.0063493	0.0417704	0.568968	0.0903065	0.28684	-0.100275	0.353964	0.59064	-0.509243	0.941139	0.997433	-1.02001	0.989257	0.999863	-0.394522	0.886103	0.980752	-0.804228	0.957713	0.998129
NM_000938	POLR2B	-0.984674	0.321578	0.447826	-1.82768	0.922923	0.966501	-3.56897	0.455998	0.650428	1.29246	0.0114416	0.083509	0.165494	0.229141	0.467365	0.0970809	0.336334	0.756134	-0.0880193	0.535172	0.883267	-0.109583	0.622632	0.894023	-0.296553	0.710857	0.934923
NM_000940	PON3	-1.16517	0.368965	0.482892	-1.84345	0.924372	0.967108	0.199276	0.0371946	0.1345	-2.76515	0.992819	0.99968	-0.251374	0.43174	0.657261	-0.117374	0.633912	0.907364	0.173264	0.242314	0.723475	-0.0386144	0.527183	0.853283	-0.214379	0.634586	0.909832
NM_000941	POR	-1.09052	0.349456	0.467979	-0.71094	0.70074	0.851713	-1.47562	0.162367	0.344072	-1.19287	0.836893	0.949212	-0.982652	0.751319	0.875077	0.205154	0.204816	0.648715	0.325632	0.119794	0.584816	0.126467	0.298211	0.710845	-0.267066	0.684692	0.92771
NM_000942	PPIB	NA	NA	NA	0.385457	0.225221	0.468672	NA	NA	NA	-0.967069	0.762058	0.913423	NA	NA	NA	0.259173	0.152005	0.592773	0.516807	0.0379575	0.40342	-0.0961719	0.605116	0.887347	0.609802	0.0245792	0.295478
NM_000943	PPIC	-0.970088	0.317796	0.445866	0.451407	0.200663	0.440846	-3.74157	0.482446	0.672667	-0.37714	0.481726	0.731996	-0.213052	0.411846	0.64026	0.254753	0.156081	0.596658	-0.34421	0.787723	0.964878	0.677801	0.0043497	0.161319	0.40589	0.08213	0.467723
NM_000944	PPP3CA	-0.407424	0.177411	0.353857	-0.163917	0.472194	0.695357	0.0664975	0.0429599	0.147618	-0.435004	0.513075	0.757294	-1.09727	0.785843	0.892771	-0.393292	0.891168	0.988841	-0.00792779	0.440895	0.84126	0.27588	0.137418	0.553818	0.428553	0.0728262	0.451075
NM_000945	PPP3R1	-0.245416	0.142823	0.350599	0.977474	0.0599209	0.232023	-2.58326	0.30666	0.511208	-0.86356	0.720942	0.890824	1.48768	0.0043086	0.0450393	0.398351	0.0598668	0.427277	0.644713	0.0148679	0.29152	0.650897	0.0058732	0.182623	0.926886	0.00244086	0.115642
NM_000946	PRIM1	0.0643483	0.0876183	0.350599	1.92133	0.00200339	0.0324136	0.529669	0.0255706	0.105274	0.531598	0.0989868	0.302709	1.69864	0.00182181	0.0270502	0.128218	0.295512	0.724818	0.0641512	0.358035	0.799649	0.344956	0.0871747	0.470906	-0.279932	0.696531	0.931063
NM_000947	PRIM2	0.113631	0.0803596	0.350599	0.696684	0.120956	0.338262	0.0175717	0.0452436	0.152191	0.299539	0.166051	0.409751	0.752967	0.0565353	0.207677	0.113535	0.314549	0.73916	0.325814	0.119679	0.584816	0.0979087	0.335895	0.741449	-0.082733	0.496391	0.851323
NM_000948	PRL	-0.560557	0.213278	0.372244	-0.076055	0.430792	0.66383	1.16481	0.0112202	0.0611303	0.951958	0.0326939	0.156053	0.476544	0.117856	0.31992	-0.482111	0.931992	0.995721	-0.770037	0.964479	0.999161	-0.281231	0.807351	0.957687	-0.708849	0.936506	0.996393
NM_000949	PRLR	-1.37199	0.422064	0.521244	-0.449435	0.599833	0.787008	-4.70361	0.620851	0.780674	0.310494	0.16231	0.403954	-0.645423	0.623651	0.797437	-0.0501189	0.542872	0.8659	-0.0802537	0.525865	0.879583	0.033401	0.425287	0.796249	0.438011	0.0692091	0.442584
NM_000950	PRRG1	-1.38493	0.425359	0.523617	-0.0660933	0.426156	0.65959	-3.15877	0.392972	0.593082	-1.67406	0.933357	0.985948	-0.640823	0.62157	0.796201	0.0102557	0.45719	0.825733	-0.644617	0.937734	0.995434	0.167898	0.246911	0.671027	-0.276286	0.693303	0.930461
NM_000951	PRRG2	0.0919229	0.083507	0.350599	1.47479	0.0120393	0.0912548	0.0419114	0.0441166	0.149983	-0.0238303	0.300389	0.572668	0.328237	0.165023	0.385571	0.189291	0.2224	0.6685	-0.278324	0.73322	0.95153	0.309383	0.111041	0.510551	0.147341	0.257366	0.693383
NM_000954	PTGDS	-3.04953	0.76398	0.787924	-0.849738	0.745898	0.877274	-8.78999	0.935896	0.979182	-0.590402	0.593502	0.813953	-1.968	0.929277	0.968097	-0.488162	0.934061	0.996076	-0.682708	0.94754	0.996248	-0.708663	0.978065	0.998777	-0.699035	0.933878	0.99635
NM_000955	PTGER1	0.204585	0.0680336	0.350599	-0.823637	0.737876	0.873006	0.738652	0.0197004	0.0891176	0.139547	0.227003	0.490016	0.763777	0.0547958	0.203664	0.226124	0.183127	0.626759	0.229112	0.191263	0.67345	0.342959	0.0883228	0.472802	0.565991	0.0326946	0.333482
NM_000956	PTGER2	0.0984571	0.0825365	0.350599	1.66957	0.00573478	0.0598304	-3.21567	0.401849	0.601753	2.54398	0.000191875	0.00700556	-0.60405	0.605285	0.785238	0.269324	0.143165	0.579752	0.551706	0.0296514	0.372005	0.162172	0.253535	0.675547	-0.527326	0.869511	0.984391
NM_000958	PTGER4	-0.279189	0.149677	0.350599	2.50714	0.000149256	0.00810749	-4.78814	0.63214	0.788854	0.207272	0.199686	0.455106	0.956975	0.0300335	0.142084	0.22098	0.188192	0.630272	-0.0273035	0.463677	0.851477	0.0874049	0.349977	0.749455	0.506456	0.0470085	0.381683
NM_000959	PTGFR	-0.971051	0.318047	0.44596	-1.04646	0.799752	0.906152	-0.998465	0.114258	0.274055	-0.51648	0.555823	0.787329	-1.3228	0.840814	0.925069	-0.301746	0.829308	0.973111	0.0822268	0.337775	0.788874	-0.28332	0.809141	0.957689	-0.869061	0.968142	0.998677
NM_000960	PTGIR	0.186402	0.0704387	0.350599	2.29118	0.000405723	0.0138365	-3.30627	0.415769	0.614237	1.20093	0.0152457	0.098117	0.559765	0.0959291	0.284393	0.216584	0.19272	0.635275	0.226439	0.193611	0.677566	0.356788	0.0801674	0.459813	0.0864502	0.316412	0.743293
NM_000961	PTGIS	NA	NA	NA	-5.18912	0.996063	0.998867	NA	NA	NA	-1.04463	0.790259	0.92772	-2.03734	0.934688	0.970555	0.291768	0.124896	0.551655	0.0209583	0.407325	0.824908	0.129421	0.294469	0.708155	0.251167	0.171739	0.610322
NM_000963	PTGS2	-0.942238	0.310538	0.440858	0.46099	0.197057	0.436628	-1.132	0.126651	0.2932	-2.01682	0.96638	0.994591	-1.08112	0.781283	0.890788	0.643242	0.00676049	0.197771	0.198404	0.218554	0.703052	0.110155	0.319507	0.727421	0.431859	0.0715576	0.448535
NM_000964	RARA	-0.78116	0.268405	0.409614	0.176541	0.313773	0.560018	-3.11168	0.385952	0.586936	-0.278322	0.428854	0.691054	0.0888228	0.262881	0.502851	0.280562	0.133789	0.567215	0.125292	0.291163	0.761011	0.217856	0.191843	0.623847	0.298537	0.139213	0.56662
NM_000965	RARB	-1.20058	0.378219	0.489175	0.706582	0.118315	0.334228	-4.56328	0.601657	0.766663	-1.03501	0.786862	0.926275	0.0893871	0.26263	0.502597	0.0765925	0.364057	0.7743	0.0154011	0.413987	0.82886	0.411057	0.0537099	0.403528	0.413437	0.0790367	0.462403
NM_000967	RPL3	-2.14704	0.601781	0.655421	-2.15202	0.946791	0.978449	-5.89869	0.761562	0.878175	0.168665	0.215015	0.475152	-0.706122	0.649534	0.814067	0.172767	0.241342	0.687211	-0.532308	0.89883	0.988252	0.146401	0.272987	0.693058	-0.34449	0.751123	0.951299
NM_000968	RPL4	NA	NA	NA	NA	NA	NA	NA	NA	NA	NA	NA	NA	NA	NA	NA	0.144324	0.275141	0.709976	-0.021259	0.456437	0.848208	0.0347521	0.423525	0.795676	-0.20919	0.629428	0.908504
NM_000969	RPL5	0.292683	0.0573313	0.350599	1.78414	0.00358003	0.0457167	-3.00124	0.368805	0.571198	2.22347	0.000544342	0.0131481	0.164369	0.229639	0.467979	0.814993	0.00102371	0.0986601	0.521403	0.0367632	0.401264	0.382373	0.0666506	0.4343	0.444661	0.0667381	0.436068
NM_000970	RPL6	NA	NA	NA	NA	NA	NA	NA	NA	NA	NA	NA	NA	NA	NA	NA	-0.477239	0.930137	0.995721	-1.00042	0.988231	0.999863	-0.818536	0.988179	0.999792	-0.434258	0.816141	0.9691
NM_000971	RPL7	-0.292703	0.152497	0.350599	0.904045	0.0731626	0.258997	-3.68368	0.473588	0.664973	-0.640107	0.61831	0.829997	2.24893	0.000160438	0.00619284	0.137928	0.283162	0.715545	0.0102161	0.419969	0.831351	-0.103168	0.614247	0.891377	-0.123354	0.540672	0.870596
NM_000972	RPL7A	-1.82591	0.531723	0.601778	0.748736	0.10746	0.31804	-9.23418	0.947145	0.983485	0.593479	0.0852323	0.277892	0.588322	0.0890345	0.271237	0.967059	0.000164596	0.0500647	0.785633	0.00462475	0.186594	0.93441	0.000208754	0.0538335	1.1311	0.000423537	0.0561363
NM_000973	RPL8	-0.0309459	0.102854	0.350599	1.64564	0.00632129	0.0632348	0.795692	0.0183726	0.0850969	0.889635	0.0390988	0.174552	0.716947	0.0627882	0.221146	-0.117027	0.633503	0.907251	0.111273	0.306036	0.769404	-0.317378	0.836255	0.966518	0.199348	0.211831	0.657037
NM_000976	RPL12	-0.295636	0.153089	0.350599	1.37873	0.0171245	0.113402	2.6981	0.000978746	0.0122056	1.25587	0.0127993	0.0888596	0.773639	0.0531534	0.200109	0.379095	0.069295	0.447784	-0.501581	0.884909	0.985569	-0.587581	0.957938	0.996692	-0.472475	0.839568	0.977244
NM_000978	RPL23	-0.476696	0.193266	0.36198	0.679388	0.125822	0.345683	-4.03556	0.526558	0.710198	0.931342	0.0348295	0.162307	0.518046	0.106738	0.303026	0.207115	0.202714	0.647381	0.288319	0.144784	0.621946	0.760441	0.00165598	0.108531	0.179841	0.228525	0.671069
NM_000979	RPL18	0.0558785	0.0889274	0.350599	-1.16506	0.827072	0.920963	2.85304	0.000762007	0.0104915	1.66709	0.00341621	0.0387929	-0.615116	0.610195	0.788896	0.147836	0.270895	0.706995	0.496448	0.0435939	0.418428	-0.0297624	0.514989	0.847409	-0.391008	0.786692	0.960878
NM_000980	RPL18A	-0.93027	0.307368	0.438762	1.11213	0.040608	0.186603	-4.60841	0.607895	0.771184	-0.44482	0.518255	0.761251	0.220025	0.206836	0.439576	0.202806	0.207321	0.651051	0.185154	0.230716	0.713614	0.0336492	0.424954	0.796055	0.257066	0.167441	0.602841
NM_000981	RPL19	-0.344201	0.163513	0.350923	1.78569	0.0035464	0.0454885	-2.22315	0.255393	0.455287	-0.707014	0.650733	0.85067	-0.232326	0.421649	0.648717	0.449188	0.0404987	0.373243	0.524254	0.0359964	0.397763	0.282367	0.132107	0.54499	0.377334	0.0952134	0.494033
NM_000982	RPL21	-0.834333	0.282119	0.419148	0.644592	0.135711	0.358478	-0.803308	0.0974867	0.247805	-1.85267	0.953051	0.990913	-1.32594	0.841511	0.925489	-0.24068	0.775374	0.957565	0.118602	0.29811	0.764429	0.528037	0.0197533	0.278876	0.445638	0.0663367	0.435122
NM_000983	RPL22	-0.192489	0.132277	0.350599	0.184028	0.310458	0.557164	1.36257	0.00856802	0.05145	1.2454	0.0132331	0.0901705	0.683433	0.0688658	0.232213	-0.10707	0.620841	0.902129	-0.230732	0.689168	0.936529	-0.0272708	0.511561	0.845672	-0.404884	0.796379	0.963642
NM_000984	RPL23A	-1.71374	0.50583	0.582216	0.484574	0.188375	0.42656	-6.32231	0.800899	0.903786	-1.11719	0.814158	0.939286	0.0999476	0.257823	0.497637	-0.775766	0.987537	0.999859	-0.725688	0.956571	0.99713	-0.678351	0.974169	0.998199	-0.575381	0.891071	0.986906
NM_000986	RPL24	-0.535667	0.207248	0.369331	0.671437	0.128143	0.348647	-3.181	0.39649	0.596273	0.253743	0.182319	0.432493	0.113154	0.252088	0.491759	-0.22287	0.757443	0.951232	-0.17638	0.633741	0.918536	0.25164	0.158376	0.583925	-0.246696	0.666149	0.921431
NM_000987	RPL26	-0.258991	0.145568	0.350599	0.591908	0.152012	0.381922	2.36825	0.00176813	0.0180973	-0.612152	0.60453	0.82136	-0.131804	0.370434	0.605281	-0.217285	0.751705	0.950415	-0.705102	0.95255	0.996533	0.173293	0.240847	0.665963	-0.28687	0.702691	0.932411
NM_000988	RPL27	-0.808196	0.275407	0.414289	1.07073	0.046059	0.199365	-7.7776	0.897524	0.959344	1.46802	0.00647788	0.0586525	2.00607	0.000441204	0.0108972	-0.0208659	0.501504	0.847994	0.0972453	0.321141	0.780004	-0.124342	0.641448	0.900773	0.199351	0.211831	0.657037
NM_000989	RPL30	-2.30378	0.633616	0.68075	1.64382	0.00636754	0.0635807	-15.4872	0.997707	0.999924	3.52926	1.04e-05	0.00103335	1.09897	0.018862	0.10719	0.184417	0.227809	0.6745	-0.0651666	0.508155	0.870695	-0.132852	0.651859	0.904711	-0.456166	0.829873	0.974086
NM_000990	RPL27A	0.214139	0.0668332	0.350599	2.98181	8.41e-06	0.00128571	-0.210447	0.0569726	0.175394	4.01682	6.26e-06	0.000718232	1.23783	0.0114375	0.0806013	0.2329	0.176405	0.619113	0.356485	0.101375	0.555157	0.422219	0.0492859	0.391204	-0.155048	0.574043	0.886022
NM_000991	RPL28	0.0196961	0.0946041	0.350599	-1.45998	0.87986	0.947712	2.57199	0.00126393	0.0145017	0.309272	0.162723	0.404688	-0.181222	0.395321	0.627575	0.234732	0.17455	0.61753	0.00233887	0.42898	0.836519	-0.378032	0.876709	0.978919	0.219745	0.195303	0.635783
NM_000992	RPL29	-0.132705	0.120975	0.350599	2.47127	0.000166073	0.00828142	2.59387	0.0012183	0.0141397	-0.296695	0.438675	0.699448	0.117025	0.25045	0.489683	0.0981053	0.334907	0.755184	-0.0928498	0.540781	0.884881	-0.281342	0.807449	0.957687	-0.254734	0.673427	0.924117
NM_000994	RPL32	-0.177097	0.129331	0.350599	-0.560808	0.645173	0.817479	1.21861	0.0104308	0.0583546	-0.476205	0.534725	0.77306	-0.889986	0.719947	0.856317	-0.0385964	0.526583	0.858697	0.25363	0.170859	0.651611	0.138281	0.283265	0.701099	-0.358114	0.761966	0.955152
NM_000995	RPL34	-0.173616	0.128665	0.350599	1.72981	0.00452602	0.0524056	-0.528306	0.076892	0.212794	0.0748733	0.254508	0.522086	0.383876	0.14611	0.360574	0.0851187	0.352479	0.767729	-0.0741826	0.518813	0.876493	-0.157609	0.681572	0.914781	-0.547789	0.879103	0.985435
NM_000996	RPL35A	-0.663189	0.238535	0.387957	0.544044	0.167812	0.401996	-2.58139	0.306409	0.510905	0.339738	0.152733	0.390169	-0.955146	0.742407	0.869442	0.0751669	0.365986	0.775019	-0.18243	0.640048	0.920769	0.0312783	0.428262	0.797466	-0.62977	0.912051	0.991889
NM_000997	RPL37	NA	NA	NA	-0.397354	0.577529	0.771764	NA	NA	NA	-0.317335	0.449797	0.708691	-1.96166	0.928755	0.967989	-0.207799	0.741365	0.946109	0.110227	0.307028	0.770197	0.0698252	0.374213	0.765321	0.296582	0.14046	0.567838
NM_000998	RPL37A	-1.88127	0.544236	0.611344	-0.428357	0.590853	0.781021	-3.82112	0.494424	0.682478	-1.41739	0.890919	0.972451	-1.8582	0.91931	0.963916	0.286107	0.129371	0.559278	0.221702	0.197694	0.681038	-0.0732319	0.574329	0.87503	0.275592	0.154396	0.583512
NM_000999	RPL38	0.0933556	0.0832925	0.350599	1.09132	0.0432652	0.192765	1.5971	0.0060299	0.0404151	1.09444	0.0213712	0.120309	1.08627	0.0196473	0.109731	0.0593085	0.388128	0.788544	0.165852	0.249624	0.728109	-0.13256	0.651478	0.904618	0.280822	0.150968	0.581446
NM_001000	RPL39	-1.01082	0.328523	0.453134	0.430569	0.208289	0.450601	-3.96964	0.516725	0.702282	-1.14113	0.82176	0.942382	0.636921	0.0781205	0.250099	0.0753906	0.36567	0.775019	-0.519411	0.893085	0.98709	0.224936	0.184478	0.615402	-0.358302	0.762127	0.955152
NM_001001	RPL36AL	-1.30823	0.405937	0.509367	-0.016687	0.402887	0.640291	-5.01842	0.661874	0.809615	-0.32347	0.452903	0.711018	0.125677	0.246764	0.48631	0.180787	0.232028	0.679026	-0.444458	0.854933	0.980454	-0.22125	0.751808	0.941186	-0.130469	0.548303	0.874932
NM_001001290	SLC2A9	-0.926295	0.306289	0.437646	0.951614	0.0642409	0.240349	-1.76936	0.196753	0.387405	-1.65095	0.93036	0.984946	-1.23648	0.821576	0.913373	0.0212576	0.441477	0.817274	0.00485808	0.426033	0.835316	0.225703	0.183798	0.615265	-0.084609	0.498493	0.85189
NM_001001317	PRSS58	0.617183	0.0284487	0.350599	1.431	0.0141688	0.100655	1.97567	0.00336059	0.0273728	0.309267	0.162727	0.404688	0.657508	0.0739724	0.24281	0.467378	0.0349345	0.356534	0.700418	0.00939804	0.23796	0.433991	0.0447516	0.37612	0.866946	0.00389212	0.137004
NM_001001323	ATP2B1	0.0884771	0.0840076	0.350599	0.20511	0.301128	0.548619	-0.123508	0.0522568	0.166418	-0.323414	0.452884	0.711018	0.59572	0.0873246	0.268155	0.288774	0.127227	0.555453	0.601413	0.0207471	0.327591	0.38677	0.0645791	0.430415	0.345165	0.111651	0.524161
NM_001001325	SPINK14	-0.98083	0.320584	0.44728	0.148182	0.326468	0.571182	-3.14913	0.391585	0.591974	-0.195844	0.386036	0.654095	-0.726524	0.658185	0.819337	0.269067	0.143432	0.579873	0.138463	0.277347	0.751349	-0.241268	0.771419	0.947837	0.864372	0.00395033	0.137778
NM_001001329	PRKCSH	-3.57026	0.833737	0.848574	-3.30961	0.982871	0.993631	-7.42896	0.879133	0.950072	-0.897833	0.735051	0.898747	-2.64465	0.96631	0.984467	-0.256885	0.790632	0.96201	-0.804926	0.969877	0.999841	-0.351699	0.860179	0.973212	-0.142063	0.560668	0.880506
NM_001001330	REEP3	NA	NA	NA	1.10607	0.0413732	0.188428	NA	NA	NA	-1.40289	0.887936	0.971339	-1.05658	0.774203	0.886496	0.195013	0.215808	0.660479	0.159479	0.255803	0.734733	0.229301	0.180176	0.611543	0.182548	0.226195	0.669386
NM_001001342	BLOC1S2	-0.965657	0.31666	0.445106	1.79475	0.00340765	0.0445756	-6.48444	0.814793	0.913048	-0.216369	0.396738	0.663461	1.04344	0.0225331	0.119341	-0.0424834	0.532176	0.861434	0.0444998	0.380185	0.811617	0.234189	0.175357	0.604357	0.409674	0.0805763	0.465368
NM_001001343	FNDC9	-0.932853	0.308062	0.439159	-0.196368	0.48745	0.707458	-4.52981	0.597019	0.763088	-0.111394	0.342913	0.614281	1.10616	0.0183976	0.105645	0.445534	0.0416529	0.376623	0.181229	0.234441	0.715581	0.575823	0.0125533	0.240683	0.340681	0.114144	0.529352
NM_001001346	CLDN20	0.0563292	0.0888529	0.350599	0.997683	0.0568138	0.225191	-3.04969	0.376176	0.577958	1.5736	0.00464672	0.0477819	0.703719	0.0650913	0.225388	0.530356	0.0200607	0.292925	0.422792	0.0691204	0.493499	0.530544	0.0193017	0.275652	0.947374	0.00204743	0.108427
NM_001001349	NKIRAS2	-0.596384	0.222049	0.377646	0.48729	0.187423	0.425675	-2.38277	0.277676	0.479506	0.996258	0.0286708	0.143682	2.60144	2.11e-05	0.00153459	-0.693468	0.979516	0.999859	-0.367381	0.804925	0.969728	-0.337501	0.850723	0.970615	-0.987187	0.981382	0.999781
NM_001001394	DNAJB3	-1.6333	0.486792	0.568972	-1.11176	0.815415	0.914821	-4.60256	0.607085	0.770466	-0.782137	0.685389	0.871459	-0.0367393	0.32202	0.561347	-0.202958	0.736128	0.944791	-0.252459	0.709688	0.943341	0.0513939	0.399751	0.781027	-0.0956705	0.510769	0.858124
NM_001001395	LMO3	-0.774702	0.266753	0.408539	0.0283724	0.382017	0.621585	-3.54929	0.45294	0.64796	0.591372	0.0856494	0.278664	-0.169265	0.389254	0.621921	-0.565392	0.956984	0.9995	-0.546655	0.904542	0.989149	-0.415608	0.897392	0.983819	-0.356646	0.760758	0.954566
NM_001001410	TSR3	-1.62801	0.485533	0.568015	0.183147	0.310862	0.557277	-6.66452	0.828982	0.9211	-1.03666	0.78744	0.926578	1.00598	0.0256595	0.129161	-0.0586733	0.554964	0.871864	0.56216	0.0274595	0.360928	0.135333	0.287006	0.70304	0.0225608	0.382805	0.789013
NM_001001411	ZNF676	0.0875084	0.0841585	0.350599	0.0684965	0.36361	0.605745	-0.260278	0.0598678	0.181326	0.24186	0.186618	0.43794	0.299955	0.17557	0.40034	0.241336	0.168209	0.609271	0.400678	0.0789299	0.514171	0.528075	0.0197473	0.278876	0.687985	0.0145809	0.242589
NM_001001412	CALHM1	0.133879	0.0774899	0.350599	3.32578	2.1e-06	0.000397831	-2.23966	0.257515	0.457515	0.547609	0.0951305	0.295695	1.86971	0.000833854	0.0165507	0.527564	0.0205805	0.296282	0.0387381	0.386687	0.814885	0.122319	0.303586	0.715166	-0.153106	0.571991	0.884906
NM_001001413	GOLGA6L1	-0.455696	0.188323	0.35952	0.632684	0.139483	0.364172	-3.7624	0.485636	0.675031	0.829659	0.0460876	0.193251	0.477275	0.117673	0.319732	0.446354	0.041402	0.376352	0.237202	0.184398	0.666461	0.156683	0.260328	0.681332	0.619905	0.0230195	0.289419
NM_001001414	NCCRP1	-0.918199	0.304167	0.435706	1.80628	0.00324368	0.0432203	-5.77717	0.749432	0.870438	0.550719	0.0944631	0.294298	-0.252628	0.432352	0.657502	0.154465	0.262956	0.699834	-0.237838	0.696055	0.938755	-0.06547	0.563944	0.871179	-0.0993017	0.514693	0.859116
NM_001001415	ZNF429	-0.575055	0.216792	0.373943	-0.195025	0.486908	0.707203	-1.69724	0.187979	0.376536	0.00497341	0.286789	0.558172	-0.412923	0.513779	0.719392	-0.336062	0.854955	0.978476	-0.374258	0.809751	0.970048	-0.0550658	0.549642	0.863377	-0.447648	0.824584	0.972218
NM_001001418	TBC1D3C	0.269802	0.0600229	0.350599	0.909135	0.072143	0.256726	2.93149	0.000634246	0.0091605	0.273331	0.175172	0.422848	1.42436	0.00555621	0.0523655	0.212835	0.196674	0.640336	0.157153	0.258213	0.736429	0.349599	0.0844348	0.467738	0.359619	0.104222	0.511135
NM_001001419	SMAD5	-1.51071	0.456933	0.546985	-0.00438828	0.397213	0.634793	-4.04224	0.52764	0.710955	-0.673241	0.634621	0.840534	-1.32295	0.840848	0.925069	0.545027	0.017674	0.281988	-0.0676205	0.511157	0.872604	0.335419	0.0931202	0.479652	0.379486	0.0942499	0.491973
NM_001001435		0.121305	0.0792755	0.350599	0.172895	0.315394	0.561522	0.106029	0.0411598	0.14378	0.199969	0.202541	0.458992	0.723055	0.0617263	0.218666	0.122812	0.302474	0.73107	0.18377	0.232073	0.714072	0.0586478	0.389703	0.775055	0.119989	0.283352	0.715964
NM_001001436	C16orf87	-0.862849	0.289552	0.424789	-0.367966	0.564932	0.762669	-3.18523	0.397111	0.596882	0.00183448	0.288307	0.559724	0.0999665	0.257821	0.497637	0.136968	0.284414	0.716654	-0.110525	0.560783	0.894542	0.091706	0.344112	0.747245	0.302975	0.136441	0.563336
NM_001001437	CCL3L3	-1.38323	0.42494	0.523346	0.306278	0.257563	0.503438	-5.68175	0.739419	0.863896	-0.0711433	0.323095	0.594692	-0.0863088	0.346991	0.584678	0.356244	0.0815694	0.472074	0.0931934	0.325541	0.781648	0.130313	0.293305	0.707181	0.0113935	0.394475	0.796317
NM_001001438	LSS	0.244035	0.063112	0.350599	1.29492	0.022731	0.133676	-0.39961	0.0685738	0.198032	-0.0356246	0.305941	0.57792	0.116458	0.25068	0.489876	0.846323	0.00072061	0.0892922	0.38911	0.0843596	0.523611	0.568459	0.0134947	0.243936	0.797997	0.00656984	0.170692
NM_001001479	SLC35E4	-1.60376	0.479684	0.563481	0.798827	0.0952671	0.297888	-5.52973	0.723017	0.852483	0.118769	0.235675	0.500351	-1.80291	0.913887	0.961844	0.0014433	0.469673	0.832824	-0.656635	0.94092	0.995644	0.340272	0.0899808	0.475478	-0.28723	0.702988	0.932411
NM_001001480	KRTAP5-5	0.0468687	0.0903165	0.350599	1.89111	0.00226406	0.0345947	3.79662	0.000114073	0.00297262	2.44129	0.0002607	0.00833809	1.60768	0.00263245	0.0332213	-0.0274146	0.510798	0.851719	-0.0447612	0.484119	0.859737	0.241265	0.168298	0.594866	0.0183851	0.387163	0.791234
NM_001001485	ATP2C1	-0.584166	0.219041	0.375585	-0.153418	0.467244	0.69121	-0.828763	0.0995811	0.251565	-1.29093	0.862951	0.960916	-0.0635464	0.335526	0.57326	-0.491018	0.935001	0.996364	-0.524848	0.895548	0.987903	-0.382121	0.879196	0.979568	-0.424319	0.809649	0.967067
NM_001001487	ATP2C1	-0.97394	0.318794	0.446151	-0.0287139	0.408622	0.644946	-0.733838	0.0919496	0.238458	-2.05184	0.968814	0.995401	-1.08137	0.781355	0.890788	0.166761	0.248263	0.691592	0.618405	0.018216	0.315378	0.312748	0.1085	0.505728	-0.0122487	0.419642	0.809487
NM_001001521	UGP2	-0.989599	0.322877	0.448673	0.181881	0.311427	0.557858	-3.25987	0.408523	0.607383	-0.58625	0.591345	0.812377	-0.294155	0.45356	0.675183	-0.257219	0.790921	0.96201	0.45619	0.0564244	0.458911	-0.137937	0.65812	0.906888	-0.223376	0.643404	0.913372
NM_001001523	RORC	-2.54927	0.68045	0.718627	-0.695672	0.695491	0.848749	-7.01891	0.854244	0.936088	-1.62153	0.92618	0.983796	-0.860988	0.709722	0.85025	0.127039	0.296956	0.72602	-0.0323811	0.469759	0.85415	0.551059	0.0159134	0.256485	0.870717	0.00379376	0.135993
NM_001001524	TM6SF2	-0.534447	0.206962	0.369182	1.23211	0.0280064	0.150264	-3.16357	0.393732	0.593647	0.00332026	0.287579	0.558819	-0.209654	0.410037	0.639129	-0.203794	0.737007	0.945197	-0.436345	0.850203	0.97989	-0.0772066	0.579701	0.877304	0.382688	0.0927706	0.490196
NM_001001547	CD36	-0.522811	0.204212	0.367891	-0.110785	0.44714	0.676813	-0.379064	0.067246	0.195655	-0.115148	0.344785	0.615958	-1.44977	0.865203	0.936685	-0.363197	0.873209	0.983334	-0.239684	0.697763	0.939081	-0.441338	0.909612	0.986473	-1.04703	0.985881	0.999781
NM_001001549	GRB10	0.0583436	0.0885357	0.350599	-0.439669	0.595706	0.784531	1.03451	0.0134081	0.0690821	-0.740519	0.666154	0.859078	0.379055	0.147681	0.362512	-0.021371	0.502261	0.848301	0.345489	0.107802	0.567476	0.0556893	0.393864	0.777494	0.126501	0.277053	0.712021
NM_001001550	GRB10	-0.640508	0.232854	0.383792	0.516547	0.177217	0.413876	-4.1662	0.545773	0.724658	0.0820043	0.251288	0.518309	1.00562	0.0256975	0.129211	0.304775	0.114988	0.537981	0.0082137	0.422279	0.832824	0.0036156	0.467588	0.820026	-0.0417091	0.451406	0.827468
NM_001001555	GRB10	-2.98236	0.753588	0.778777	-2.50517	0.963338	0.985704	-6.04266	0.775568	0.88727	-2.40681	0.984942	0.999162	-0.974814	0.74889	0.873707	-0.42411	0.907489	0.993262	-0.589733	0.920598	0.991672	0.784363	0.00125854	0.0975782	-0.476974	0.842222	0.97777
NM_001001556	GALK2	-0.248876	0.143522	0.350599	1.21668	0.0294706	0.154601	2.9029	0.000677593	0.00964785	0.45555	0.118287	0.336274	1.81106	0.00110406	0.019692	-0.190747	0.722443	0.940051	-0.225318	0.683913	0.935303	-0.16464	0.689718	0.918218	-0.4148	0.803206	0.965059
NM_001001557	GDF6	-0.972382	0.318396	0.446022	1.71888	0.00473414	0.0536557	-7.12699	0.861271	0.940269	2.02979	0.00100317	0.018669	-0.511216	0.562003	0.754313	-0.175952	0.705184	0.93383	-0.192095	0.649944	0.924625	-0.215067	0.745485	0.938447	-0.0561322	0.467291	0.836838
NM_001001563	TIMM50	-0.338219	0.162197	0.350659	0.230847	0.289775	0.537504	-2.87074	0.349231	0.553251	-0.38666	0.486802	0.735834	1.67368	0.00200758	0.0283646	-0.100037	0.61124	0.897807	0.318391	0.124338	0.592769	0.522534	0.0208131	0.283898	0.412409	0.0794703	0.46353
NM_001001656	OR9A4	-0.938009	0.309409	0.439928	-0.0367263	0.412381	0.648219	-3.69548	0.475383	0.666731	-1.16455	0.82868	0.945173	1.14472	0.0161029	0.098324	0.340072	0.0910578	0.493455	0.278139	0.152199	0.634052	0.215622	0.194145	0.625418	0.335894	0.11675	0.534417
NM_001001657	OR2Y1	0.0703129	0.0867264	0.350599	0.149923	0.325686	0.570649	0.646808	0.0221689	0.0962833	0.500585	0.106624	0.316534	-1.01606	0.761744	0.880587	0.161256	0.254823	0.69548	0.41946	0.0706097	0.498013	0.238131	0.171483	0.599258	0.416028	0.0779528	0.459463
NM_001001658	OR9A2	-0.118144	0.118293	0.350599	1.46184	0.0126762	0.0942268	-0.412425	0.0693313	0.199256	-0.817113	0.700858	0.880554	0.328251	0.165021	0.385571	-0.0755533	0.578295	0.88344	-0.19132	0.649147	0.924173	-0.109433	0.622437	0.894014	-0.096269	0.511431	0.858124
NM_001001659	OR2A14	-0.0422428	0.104763	0.350599	1.19557	0.0315476	0.160788	3.74505	0.000130043	0.00320367	1.13995	0.0184492	0.110258	1.46137	0.0047498	0.0473214	-0.139655	0.661883	0.917072	0.0843069	0.335439	0.787245	0.0276161	0.433547	0.801208	-0.141239	0.559831	0.880261
NM_001001660	ETFRF1	-1.40162	0.429597	0.526547	-1.29292	0.852323	0.934042	-4.18093	0.547865	0.726335	0.523807	0.100868	0.306062	-0.656448	0.628441	0.800709	-0.0406353	0.529542	0.860181	-0.0853719	0.531923	0.881304	-0.383952	0.880234	0.979584	0.0588305	0.344259	0.761827
NM_001001661	ZNF425	-0.55003	0.21071	0.370748	0.50142	0.182514	0.420042	-0.852361	0.101559	0.254595	-1.09268	0.806254	0.935588	-0.756501	0.670499	0.827317	0.0977683	0.335427	0.755531	0.355778	0.101779	0.555358	0.532166	0.0190187	0.274608	0.44479	0.0666819	0.436068
NM_001001662	ZNF782	-0.759709	0.262853	0.405476	2.9592	1.47e-05	0.00205908	-7.88676	0.90286	0.96258	1.64314	0.00367691	0.0407554	0.245582	0.196659	0.426952	-0.232578	0.767223	0.954932	-0.0649313	0.507855	0.870457	0.156903	0.260051	0.68094	-0.0981772	0.513523	0.858772
NM_001001663	TMEM211	-0.220051	0.137755	0.350599	-0.494276	0.618503	0.799686	0.440521	0.0283494	0.113017	-0.588694	0.592649	0.8133	-0.237753	0.424548	0.65083	0.377086	0.0703026	0.448851	0.467188	0.0526025	0.447792	0.179494	0.233824	0.66148	0.0446464	0.359143	0.774098
NM_001001664	SPOPL	-0.706806	0.249507	0.395633	-0.108355	0.446039	0.675997	2.3153	0.00195065	0.0193249	1.60576	0.004142	0.0441585	0.583675	0.0901787	0.273402	-0.928438	0.995132	0.999859	-0.592253	0.921474	0.991672	-0.357481	0.863963	0.974541	-0.949052	0.977848	0.999781
NM_001001665	CYP27C1	-0.126163	0.119762	0.350599	1.25663	0.0258149	0.143769	-3.85178	0.499087	0.68644	0.894902	0.0385002	0.172988	1.1956	0.0134134	0.0880123	0.365437	0.0764609	0.461073	0.570839	0.0258396	0.350913	0.563375	0.0141692	0.246997	0.32713	0.121736	0.542279
NM_001001666	ANO7	-0.618088	0.22735	0.380474	0.0805554	0.357783	0.600461	1.2056	0.0106225	0.0590084	0.0656739	0.258617	0.526965	-0.747272	0.666849	0.825179	-0.779304	0.987792	0.999859	-0.332926	0.779064	0.962272	-0.603525	0.961286	0.996692	-0.756598	0.948005	0.997236
NM_001001667	OR6V1	-3.93301	0.872338	0.883616	-0.321759	0.544348	0.748998	-13.0859	0.990003	0.998179	-2.54315	0.988619	0.99968	0.218787	0.207298	0.440315	-0.16474	0.692045	0.929083	0.465884	0.0530261	0.44898	-0.0937365	0.601821	0.886412	-0.142554	0.56118	0.880924
NM_001001668	ZNF470	-1.82259	0.53095	0.601265	-1.12444	0.818316	0.91638	-5.71395	0.742866	0.866239	0.203917	0.201031	0.457145	-0.655894	0.628133	0.800491	-0.223678	0.758353	0.951669	-0.13756	0.591545	0.904803	-0.283457	0.809267	0.957723	-0.325835	0.735972	0.944768
NM_001001669	ARHGEF37	0.0958239	0.0829182	0.350599	2.23853	0.000498219	0.0149582	0.937051	0.0152903	0.075539	0.969405	0.0310713	0.150768	1.2855	0.00964737	0.0730335	0.069109	0.3744	0.781002	0.0342771	0.391821	0.818955	0.198704	0.212204	0.641179	0.0812051	0.321609	0.746472
NM_001001670	SPATA31D1	-0.708542	0.249948	0.395988	-0.997912	0.787555	0.900207	-2.37353	0.276335	0.477962	0.393871	0.135768	0.364097	0.143401	0.238852	0.477869	0.139289	0.281365	0.714449	-0.526936	0.896497	0.988048	0.183803	0.22893	0.657143	-0.690638	0.931556	0.996195
NM_001001671	MAP3K15	0.0226243	0.0941404	0.350599	-0.503999	0.622591	0.802859	-1.02448	0.116692	0.278203	1.42291	0.00752902	0.0642085	0.493551	0.1131	0.312749	0.013122	0.453071	0.824271	-0.0930355	0.540973	0.884881	0.236055	0.17349	0.601148	-0.0656447	0.477607	0.842251
NM_001001673	RNASE9	-0.00117325	0.0979231	0.350599	0.481547	0.189504	0.427983	2.60721	0.0011818	0.0138837	-0.0174262	0.297332	0.569231	1.4047	0.00596364	0.0547296	-0.211833	0.745741	0.947431	0.0373148	0.388256	0.815744	0.111577	0.317508	0.725733	0.0582481	0.344839	0.762257
NM_001001674	OR4F15	-0.164017	0.126839	0.350599	1.72098	0.00469209	0.053444	-0.147167	0.0535185	0.168757	1.21264	0.0146618	0.0956475	-0.232505	0.421738	0.648743	-0.188603	0.719831	0.93928	0.16991	0.245547	0.7253	-0.122061	0.638461	0.899365	-0.515315	0.863326	0.982614
NM_001001683	MED11	-0.524889	0.20468	0.3681	0.596818	0.150412	0.379324	-2.92043	0.356706	0.560075	0.755859	0.0560234	0.216404	-0.531802	0.571863	0.761013	-0.324558	0.846835	0.976821	-0.512676	0.890164	0.986843	-0.154722	0.678385	0.914296	-0.100772	0.516243	0.859999
NM_001001694	IL17REL	-1.76913	0.518748	0.591877	-0.266762	0.519721	0.731224	-4.9198	0.649251	0.800667	-1.65268	0.930581	0.985086	-0.237282	0.424273	0.650702	0.118892	0.307574	0.733414	0.186497	0.229437	0.712523	0.280435	0.133685	0.547028	0.253566	0.16991	0.607189
NM_001001701	C4orf3	-1.94492	0.558527	0.622068	-0.0601279	0.423329	0.657019	-8.08863	0.911372	0.966062	0.0311078	0.27438	0.544672	0.337985	0.161668	0.381349	0.0957294	0.33804	0.757616	-0.108288	0.55831	0.893605	0.273682	0.139196	0.556434	0.512508	0.0453746	0.377194
NM_001001709		0.0963126	0.0828493	0.350599	0.782426	0.0992003	0.305256	-1.4892	0.163893	0.345682	1.02287	0.0264767	0.136979	0.0691486	0.271788	0.512234	0.326213	0.0998336	0.510904	0.217297	0.20164	0.68547	0.0359661	0.421769	0.794317	0.549971	0.0361642	0.348071
NM_001001710	FAM166A	-1.55676	0.468269	0.554785	-0.261991	0.517642	0.729732	-2.7574	0.33195	0.5359	-1.10039	0.808817	0.936731	-2.10726	0.939781	0.972627	-0.0285864	0.512548	0.853049	0.0447499	0.379912	0.811469	-0.262809	0.791279	0.952697	-0.318707	0.730181	0.94292
NM_001001711	DDI1	0.21477	0.0667486	0.350599	1.67364	0.00566961	0.0597682	1.4867	0.00706796	0.0448815	0.336728	0.153734	0.39182	0.790082	0.0507701	0.194845	0.138929	0.281865	0.714775	0.617861	0.0182862	0.315378	0.389358	0.0633226	0.428299	-0.287066	0.702846	0.932411
NM_001001712	LCN10	-1.59589	0.477748	0.562088	-0.0378207	0.412936	0.648516	-6.14279	0.784838	0.89302	0.634984	0.076892	0.261506	-0.837919	0.701263	0.845847	-0.37777	0.882209	0.986446	-0.175436	0.632657	0.918184	-0.0780169	0.58073	0.877457	-1.32003	0.995977	0.999781
NM_001001713	SH3BGR	-4.11427	0.888676	0.898527	-9.15825	0.999486	0.999941	-3.83586	0.496649	0.684387	-3.06285	0.996094	0.99968	-0.400128	0.507283	0.715106	-0.0261559	0.508951	0.851399	-0.338638	0.783381	0.96349	0.130341	0.293281	0.707181	0.625106	0.0222126	0.28517
NM_001001722	CDY2B	0.0244113	0.0938504	0.350599	0.884975	0.0768919	0.265681	-0.43244	0.0706385	0.201871	0.368584	0.143512	0.375624	1.39905	0.00609241	0.0552296	0.412472	0.0537406	0.409419	-0.168573	0.625349	0.916169	0.164276	0.251026	0.674342	-0.310531	0.723017	0.939833
NM_001001734	ATP1A4	-0.353523	0.165567	0.351115	1.1929	0.0318083	0.161582	-1.99088	0.224635	0.420796	0.439114	0.122746	0.34289	0.870427	0.0395479	0.167945	-0.295879	0.824643	0.97188	-0.556623	0.908539	0.990082	0.0372978	0.419801	0.793546	-0.598888	0.900547	0.989005
NM_001001786	BLID	-0.430093	0.182542	0.356616	0.770622	0.102101	0.31001	0.0661483	0.0429713	0.147618	-1.80636	0.94863	0.990684	-0.750781	0.668221	0.825656	-0.287237	0.817417	0.970429	-0.397963	0.825986	0.974351	-0.557959	0.950596	0.995712	-0.464641	0.834881	0.975597
NM_001001788	RAET1G	-0.0503363	0.106131	0.350599	0.951274	0.0643081	0.240445	1.11563	0.012021	0.0640097	0.400052	0.133806	0.361156	2.92321	4.22e-06	0.000579124	0.0318672	0.426418	0.807985	-0.0061888	0.438781	0.840601	-0.0646595	0.562748	0.870612	-0.162364	0.581684	0.888332
NM_001001791		-0.18644	0.131127	0.350599	0.646311	0.135251	0.357817	1.54587	0.00644284	0.0421599	0.476203	0.112887	0.328019	-0.250817	0.43148	0.657085	-0.0909522	0.598955	0.892757	-0.0102735	0.443593	0.842276	-0.311726	0.831955	0.965781	-0.332807	0.741725	0.947253
NM_001001794	DENND6B	0.51332	0.0360961	0.350599	0.198506	0.303969	0.551475	2.9832	0.000579491	0.00865242	0.640774	0.0757511	0.259379	1.46528	0.00467592	0.0468283	0.655676	0.00594152	0.188705	0.478741	0.0489152	0.437764	0.196983	0.214109	0.642697	0.721879	0.0113833	0.217037
NM_001001795	C8orf82	-2.66969	0.702086	0.736214	-0.757067	0.716366	0.860865	-7.42393	0.878868	0.949926	0.0204539	0.279247	0.549537	-2.51821	0.961641	0.982489	0.164468	0.250979	0.692984	0.284321	0.147713	0.626809	0.0541557	0.395951	0.779128	0.15976	0.246255	0.684281
NM_001001821	OR2T34	-0.141349	0.122583	0.350599	0.285904	0.266152	0.512439	0.268666	0.0344843	0.127827	0.150931	0.222248	0.484396	-1.2709	0.82936	0.917864	0.0491305	0.40242	0.798612	-0.115158	0.56606	0.896095	-0.0992921	0.609223	0.888974	-0.328449	0.738196	0.945233
NM_001001824	OR2T27	0.20865	0.0675234	0.350599	1.57184	0.00845081	0.0752645	4.33211	2.97e-05	0.00120479	2.09037	0.000840497	0.0169474	1.3945	0.00618319	0.0555932	0.2648	0.147119	0.585948	0.193616	0.222895	0.706505	0.345732	0.0867391	0.470052	0.030453	0.374394	0.784071
NM_001001827	OR2T35	-0.227625	0.139243	0.350599	-0.713509	0.701581	0.852128	-0.83544	0.100147	0.25236	0.765048	0.0547658	0.213538	-0.126599	0.367658	0.603035	0.514971	0.0230354	0.311309	0.55045	0.0299123	0.372044	0.414555	0.0523349	0.400144	0.656315	0.0181157	0.261751
NM_001001850	STX19	-0.103615	0.11562	0.350599	1.5468	0.00919919	0.0784488	2.96446	0.000600024	0.00883955	0.437188	0.123236	0.343544	0.293844	0.177911	0.40306	-0.0962405	0.606047	0.895637	-0.319754	0.768357	0.960092	0.0434066	0.411241	0.7881	-0.0418738	0.45161	0.827468
NM_001001852	PIM3	NA	NA	NA	1.2947	0.0227583	0.133769	NA	NA	NA	-0.202169	0.389305	0.657001	2.4479	5.91e-05	0.00322772	-0.0839375	0.589479	0.888405	0.112071	0.305236	0.769404	-0.21841	0.748825	0.94031	0.362318	0.102863	0.508635
NM_001001872	ARMH4	-0.594644	0.221609	0.377424	0.351787	0.238487	0.483806	-2.63855	0.314355	0.518521	-0.0297245	0.303086	0.57485	-0.0620907	0.334829	0.572597	0.041374	0.413389	0.802349	-0.527084	0.896563	0.988048	0.0359298	0.421813	0.794317	-0.177472	0.597064	0.893938
NM_001001888	VCX3B	-0.17116	0.128199	0.350599	0.329112	0.247951	0.49257	2.01912	0.00309366	0.0258166	-0.110395	0.342416	0.613882	2.09605	0.000280766	0.00821062	-0.168201	0.696172	0.93051	-0.0943817	0.542513	0.88531	-0.47907	0.925272	0.990841	0.0570113	0.346136	0.763501
NM_001001890	RUNX1	0.145993	0.0758855	0.350599	2.05544	0.00110996	0.0227187	-1.63805	0.180924	0.367909	0.087855	0.248773	0.515622	1.7472	0.00145661	0.0234236	0.106815	0.323287	0.746325	0.177909	0.237835	0.716982	0.151766	0.266319	0.687832	0.14748	0.257253	0.693383
NM_001001894	TTC3	-1.68455	0.498947	0.577418	-0.932121	0.769959	0.890265	-5.23802	0.688964	0.828827	-1.16627	0.829152	0.945203	0.598213	0.086763	0.266938	0.171572	0.242733	0.688174	0.107081	0.310426	0.773052	0.478005	0.0309116	0.327239	0.592983	0.0274235	0.310708
NM_001001912	OR4E2	-0.102899	0.115498	0.350599	1.06452	0.0468536	0.200809	-0.0923319	0.0506005	0.163094	-0.0676244	0.321381	0.592949	-0.869691	0.712876	0.852049	-0.157412	0.68347	0.925426	-0.0819616	0.52783	0.880487	0.0872396	0.350192	0.749644	-0.259463	0.677823	0.924983
NM_001001913	OR52N1	0.0871674	0.0842147	0.350599	1.83402	0.00290943	0.0404413	0.472134	0.0272794	0.109883	1.5267	0.00536625	0.0520639	0.383667	0.146182	0.360627	-0.0146504	0.492572	0.842938	0.261701	0.164478	0.644354	-0.232223	0.762553	0.944282	0.333842	0.117866	0.536885
NM_001001914	OR2G3	-0.00182254	0.0980424	0.350599	0.608754	0.146874	0.374808	0.112202	0.040886	0.143143	0.511331	0.104024	0.311923	1.24192	0.0112876	0.0801332	-0.221168	0.755713	0.951007	0.184895	0.230987	0.713614	-0.259028	0.787908	0.95137	0.288011	0.14616	0.575579
NM_001001915	OR2G2	-1.62897	0.485767	0.568227	1.00926	0.0549702	0.220249	-8.47904	0.926028	0.973967	-0.644723	0.620627	0.831606	1.59861	0.00271478	0.0338158	-0.148294	0.672478	0.920259	0.281918	0.149443	0.62944	0.036318	0.421271	0.794317	-0.119417	0.536328	0.868201
NM_001001916	OR52J3	-0.319724	0.15823	0.350599	0.469002	0.194085	0.43295	0.499778	0.0264467	0.107371	0.317934	0.159822	0.400686	-0.0899045	0.348825	0.586354	-0.170712	0.699271	0.931777	-0.276282	0.731391	0.950892	-0.298768	0.821843	0.96221	-0.533135	0.872325	0.984394
NM_001001917	OR56A1	-1.5209	0.459421	0.54856	-0.4627	0.605372	0.790456	-6.45344	0.812131	0.91085	0.908035	0.0371143	0.169192	-0.0754821	0.341466	0.578536	0.299931	0.118509	0.542263	0.566693	0.0265441	0.353202	0.0835849	0.355238	0.752244	0.280883	0.150928	0.581446
NM_001001918	OR14C36	-0.230921	0.139894	0.350599	0.571097	0.158842	0.390391	-2.22827	0.256165	0.456334	1.1358	0.018687	0.110935	-0.402313	0.508366	0.715625	0.247806	0.162336	0.60375	0.0335425	0.392698	0.819149	0.40764	0.0551772	0.408449	0.115881	0.287312	0.719722
NM_001001919	OR13C4	0.129088	0.0781598	0.350599	0.401055	0.219446	0.462853	0.0642497	0.0430534	0.147778	0.0271501	0.276217	0.546588	0.023898	0.29289	0.533614	0.429318	0.0473053	0.39076	0.1821	0.233582	0.715449	0.00935968	0.459322	0.815065	0.245366	0.176009	0.613728
NM_001001920	OR4C15	-0.0927729	0.113663	0.350599	1.18619	0.0324873	0.163734	1.40243	0.00804671	0.0493522	0.918935	0.0359537	0.165514	-1.47	0.868673	0.93851	-0.0207207	0.501316	0.847994	-0.234373	0.692737	0.937814	-0.0556912	0.550493	0.864187	-0.0603065	0.471866	0.838515
NM_001001921	OR5AS1	-0.197222	0.133225	0.350599	1.41344	0.0151232	0.104523	-0.445668	0.0715215	0.203434	2.05366	0.00091975	0.0176403	0.418173	0.135279	0.346412	0.0461795	0.406571	0.79956	-0.294637	0.747453	0.954747	-0.0586422	0.554478	0.866257	-0.481787	0.844895	0.97847
NM_001001922	OR52N5	-0.858816	0.288494	0.424201	1.63746	0.00650418	0.0644432	-2.33144	0.270291	0.471681	-1.37159	0.88139	0.968736	-0.503165	0.558123	0.751757	-0.910805	0.994564	0.999859	-0.848063	0.975353	0.999863	-0.641663	0.968448	0.997924	-1.03473	0.985016	0.999781
NM_001001923	OR5C1	-2.36996	0.646681	0.691374	-0.991905	0.786075	0.899618	-9.73362	0.956985	0.986655	-0.358043	0.471477	0.725295	1.60374	0.00266411	0.033456	0.400163	0.0590278	0.425305	0.202348	0.214868	0.698035	-0.0325204	0.518692	0.848438	0.164601	0.241964	0.681834
NM_001001925	MTUS1	-0.157622	0.125613	0.350599	0.544847	0.167528	0.401775	-0.680545	0.0879297	0.231787	-0.854902	0.717307	0.888985	0.360112	0.154033	0.370786	0.447266	0.041137	0.376243	0.474738	0.0501396	0.441523	0.343891	0.0878431	0.471783	0.913117	0.00269779	0.118266
NM_001001931	MTUS1	-1.88293	0.544607	0.611698	-0.557157	0.643748	0.816588	-6.59964	0.82423	0.918428	-0.367769	0.476748	0.728777	-0.0071488	0.307532	0.547832	0.16297	0.25279	0.693746	0.474167	0.0503162	0.441523	0.364375	0.0758599	0.451185	0.0974364	0.305352	0.736179
NM_001001933	LHX8	-0.0721569	0.110011	0.350599	1.1078	0.0411504	0.187792	0.386469	0.0301997	0.117521	0.461057	0.116867	0.334162	-0.593903	0.600641	0.781899	-0.107518	0.621403	0.902129	-0.25261	0.709827	0.943401	0.411591	0.0535052	0.403206	-0.34009	0.747632	0.949874
NM_001001937	ATP5F1A	-0.132993	0.121032	0.350599	-0.709281	0.700188	0.851376	-1.71913	0.190593	0.379914	0.532077	0.0988659	0.302626	1.36437	0.00699593	0.0600425	-0.132028	0.652533	0.914758	-0.528682	0.89724	0.988199	0.457527	0.0367788	0.350591	0.432462	0.0713127	0.448535
NM_001001952	OR5D18	0.126678	0.0785108	0.350599	0.854679	0.0830744	0.277451	0.85903	0.0168098	0.0802122	-0.375554	0.480867	0.7316	-0.669435	0.633942	0.804392	0.16347	0.252181	0.693516	-0.0422412	0.481155	0.858759	0.248063	0.161806	0.588044	0.137421	0.26668	0.702192
NM_001001953	OR10G9	-0.0705973	0.109747	0.350599	0.723951	0.11379	0.327759	-0.639846	0.0848406	0.226262	-0.502201	0.548484	0.782694	0.81525	0.0469977	0.185989	-0.243811	0.77844	0.958605	-0.0843636	0.530686	0.881304	0.0667232	0.37847	0.767913	-0.0209376	0.42892	0.814595
NM_001001954	OR5A2	-1.82549	0.531621	0.601755	0.410447	0.215847	0.459146	-8.09526	0.911635	0.966062	0.0919489	0.246998	0.513943	0.290911	0.17907	0.404551	-0.340372	0.857945	0.979197	-0.286276	0.740129	0.953702	-0.242142	0.772216	0.948064	0.240959	0.179116	0.617445
NM_001001955	OR4C13	-0.220729	0.137886	0.350599	-0.546417	0.63968	0.813447	4.23415	4.79e-05	0.00178839	-0.914844	0.741648	0.902297	-1.55503	0.882308	0.944968	0.0944097	0.339947	0.759368	-0.520333	0.893522	0.987093	-0.269957	0.797666	0.954776	-0.187035	0.607127	0.898337
NM_001001956	OR13C9	-2.81975	0.727559	0.757254	-0.46626	0.606909	0.791471	-10.7227	0.970476	0.991024	0.546685	0.09536	0.296236	-0.636673	0.619801	0.795204	-0.242867	0.777574	0.957984	-0.886274	0.979546	0.999863	-0.0510069	0.544074	0.860509	-0.205772	0.626075	0.907588
NM_001001957	OR2W3	-0.106189	0.11611	0.350599	0.3017	0.259461	0.505607	-1.51544	0.1668	0.349488	0.33693	0.153667	0.391693	1.09916	0.0188409	0.107097	0.0137085	0.452234	0.824033	-0.0885785	0.535893	0.883577	-0.142482	0.663712	0.908998	-0.207405	0.627651	0.908059
NM_001001958	OR7G3	0.0806702	0.0851834	0.350599	1.72426	0.00464795	0.0532565	2.23591	0.00216967	0.0204458	-0.196611	0.386454	0.65438	0.466621	0.120708	0.324764	0.347121	0.0868124	0.484309	-0.00962014	0.44283	0.842083	0.371018	0.0723994	0.443701	-0.385837	0.782941	0.959465
NM_001001959	OR11L1	0.360794	0.0499028	0.350599	0.613671	0.145289	0.372342	1.74995	0.00476369	0.0347127	-0.320749	0.451526	0.710071	0.638188	0.0778651	0.249683	0.48449	0.0301994	0.340532	0.0117535	0.418271	0.830522	0.651377	0.00584711	0.18254	0.295553	0.141124	0.568844
NM_001001960	OR5W2	0.234554	0.0642689	0.350599	0.457889	0.19826	0.438166	0.440296	0.0283608	0.113024	0.00982921	0.284472	0.555574	0.320428	0.167898	0.389828	0.398088	0.0599913	0.427277	0.26131	0.164747	0.644561	0.111397	0.317775	0.725766	0.167421	0.239393	0.679946
NM_001001961	OR13C3	-1.35717	0.418308	0.518351	0.159349	0.32156	0.56725	-4.06261	0.530763	0.713301	-1.67192	0.933102	0.985927	0.146508	0.237499	0.476171	0.0901889	0.34572	0.762676	-0.0987334	0.547369	0.887722	0.198885	0.212013	0.641	-0.340673	0.74807	0.949874
NM_001001963	OR2L8	-0.897852	0.298773	0.431769	0.312988	0.25476	0.500035	-4.12284	0.539483	0.72003	0.338542	0.153129	0.390762	-0.120098	0.364268	0.59997	0.0862112	0.351142	0.767183	0.530818	0.0344548	0.39112	0.545542	0.0167625	0.263053	0.452932	0.063675	0.427715
NM_001001964	OR2T11	-1.49016	0.451858	0.542854	-0.583715	0.654196	0.823108	-4.11946	0.539006	0.719735	-0.556667	0.576419	0.802042	-0.700797	0.647366	0.813101	-0.367892	0.876238	0.984082	-0.519972	0.893344	0.98709	-0.243866	0.773886	0.948165	-0.504413	0.857461	0.982197
NM_001001965	OR4D5	-0.275942	0.149009	0.350599	0.968903	0.0613335	0.23526	-1.65717	0.183274	0.370777	-0.732335	0.662508	0.857497	0.316828	0.169127	0.391497	-0.207456	0.741012	0.946109	-0.00106039	0.432802	0.838153	0.116362	0.311203	0.719831	-0.184173	0.604049	0.896268
NM_001001966	OR14A16	0.0628233	0.0878513	0.350599	0.109371	0.34441	0.588234	0.257445	0.0349132	0.128735	-0.594767	0.595654	0.814965	0.479244	0.117063	0.318632	-0.0103051	0.486338	0.839387	0.348028	0.106323	0.563717	-0.119915	0.635705	0.898361	0.523422	0.0423878	0.368775
NM_001001967	OR5D13	-0.49138	0.196739	0.364308	-0.473213	0.609821	0.793417	-1.092	0.122941	0.287662	-0.373247	0.479588	0.730711	-0.0270648	0.317169	0.556609	-0.228761	0.763479	0.953663	-0.200464	0.658828	0.92861	0.0868583	0.350692	0.74997	-0.375102	0.774903	0.958415
NM_001001968	OR6S1	-1.8201	0.530383	0.600761	0.0992912	0.349063	0.592661	-6.25493	0.795102	0.900063	0.0799031	0.252208	0.519424	-1.20466	0.814021	0.909493	0.129787	0.293531	0.724391	0.113775	0.303373	0.768063	0.119491	0.307263	0.716988	-1.02773	0.984502	0.999781
NM_001001974	PLEKHA1	0.439171	0.0423471	0.350599	2.4168	0.000218628	0.00961463	-0.452483	0.0719892	0.204284	0.094743	0.245832	0.512436	2.3976	8.02e-05	0.00414476	0.459726	0.0372128	0.361424	0.644866	0.0148418	0.291491	0.553787	0.0154939	0.254828	0.0983043	0.304459	0.735091
NM_001001991	PAMR1	-0.423219	0.180969	0.355914	-0.135836	0.458942	0.685725	-3.23366	0.404672	0.604337	2.01955	0.00104697	0.0190708	-0.342926	0.47832	0.693102	0.269466	0.143022	0.579406	-0.0557905	0.496916	0.866237	0.251075	0.158912	0.584877	0.609672	0.0245972	0.295478
NM_001001994	GPM6B	-1.46353	0.445214	0.53776	-0.325967	0.546313	0.750393	-4.80436	0.634316	0.790365	-0.325637	0.4541	0.711776	-0.398158	0.506325	0.714454	-0.230392	0.765013	0.953746	-0.0601623	0.502209	0.868108	-0.265565	0.793729	0.953383	-0.691624	0.931783	0.996195
NM_001002	RPLP0	NA	NA	NA	0.26286	0.276011	0.523474	NA	NA	NA	-0.159532	0.367433	0.637389	-1.18011	0.807834	0.905924	-0.449191	0.918906	0.994502	0.0283457	0.39875	0.822448	-0.216153	0.746557	0.938935	-0.433102	0.815376	0.968928
NM_001002009	NT5C3A	-0.468365	0.191308	0.360784	-0.258499	0.516021	0.728738	-2.61862	0.311615	0.516152	-0.280381	0.430005	0.692091	1.28404	0.00970648	0.0734005	0.249739	0.16061	0.602283	0.612317	0.0190992	0.319588	0.606653	0.00917312	0.214205	0.172714	0.234824	0.676632
NM_001002020	PUS1	NA	NA	NA	NA	NA	NA	NA	NA	NA	-0.726388	0.659682	0.855513	-0.807969	0.68999	0.839343	-0.676007	0.977348	0.999859	-0.979912	0.987095	0.999863	-0.146935	0.669097	0.911428	-1.42662	0.997521	0.999781
NM_001002026	CLDN18	-0.76791	0.264982	0.40699	-1.05414	0.801658	0.906931	-2.068	0.234863	0.432139	-1.20091	0.839215	0.95032	1.25141	0.0109013	0.0785488	-0.0135636	0.491022	0.841739	-0.119558	0.571095	0.89811	-0.00296369	0.47707	0.826348	0.265528	0.161319	0.593748
NM_001002031	ATP5MC2	-0.10973	0.116747	0.350599	1.38376	0.0168259	0.112305	-3.22658	0.403538	0.603443	-0.00206018	0.290182	0.561622	1.77751	0.00126239	0.0212806	-0.174874	0.704002	0.933539	-0.391333	0.821522	0.972458	0.401902	0.0576742	0.414908	-0.274617	0.691683	0.929572
NM_001002034	PHETA2	0.0337186	0.092382	0.350599	1.07951	0.0449407	0.196309	-0.276426	0.060883	0.183671	2.21175	0.000558941	0.0131938	1.29228	0.0093835	0.0720297	0.179213	0.233863	0.680467	0.179084	0.236627	0.715932	-0.575457	0.954985	0.995947	0.352034	0.108207	0.518091
NM_001002035	DEFB108B	-0.362618	0.167567	0.351141	1.30227	0.022134	0.131438	-3.17134	0.394959	0.594659	0.831072	0.0459166	0.19311	-0.412478	0.513538	0.719383	0.036533	0.419899	0.804621	0.275034	0.154433	0.636809	0.713221	0.00291653	0.138451	0.509258	0.0462478	0.38019
NM_001002036	ASTL	-0.536433	0.207449	0.369335	-1.83422	0.923541	0.966841	-1.91069	0.214302	0.408694	-0.233741	0.405785	0.671185	1.83292	0.00100062	0.0185805	0.4573	0.0378732	0.365099	0.61392	0.0188804	0.317956	0.723298	0.00258734	0.131416	0.411869	0.079661	0.463808
NM_001002245	ANAPC11	-1.59634	0.477864	0.562184	0.106165	0.345907	0.589699	-7.14307	0.86225	0.94066	0.0783917	0.252915	0.520371	0.573156	0.0926528	0.278733	-0.0852629	0.591312	0.889141	-0.281291	0.735877	0.952725	0.353856	0.0818896	0.463396	0.0430176	0.360797	0.775143
NM_001002254	AWAT2	0.185838	0.0705194	0.350599	0.48754	0.187335	0.425623	2.81283	0.000814481	0.0109546	-0.0871389	0.331058	0.603931	-0.280324	0.446384	0.669327	-0.144795	0.668128	0.918912	0.116934	0.299932	0.766133	0.57755	0.0123345	0.239081	0.193664	0.216678	0.661522
NM_001002255	SUMO4	-0.302572	0.15454	0.350599	1.21777	0.029376	0.154425	-3.99889	0.521058	0.705968	1.54022	0.00512224	0.0504546	0.0306085	0.289736	0.530653	-0.101485	0.613261	0.898069	-0.496531	0.882527	0.985186	0.723737	0.00257329	0.131416	-0.0292768	0.437931	0.819523
NM_001002257	LCLAT1	0.473803	0.0393418	0.350599	1.27056	0.024665	0.140681	0.401917	0.0296635	0.116307	0.978562	0.0302412	0.148221	-0.23267	0.421825	0.648743	0.534549	0.0193822	0.290182	0.691248	0.0101427	0.245297	0.0798394	0.360435	0.755719	0.589577	0.0280377	0.313373
NM_001002258	ATP5MC3	-6.30475	0.982355	0.983384	-6.53844	0.998209	0.999724	-11.7773	0.980884	0.994338	-2.29864	0.981088	0.998135	-4.60465	0.995168	0.998374	-0.806891	0.989755	0.999859	-0.717577	0.955015	0.996835	-0.661437	0.971712	0.998135	-1.01118	0.983209	0.999781
NM_001002261	ZFYVE27	0.339856	0.0521171	0.350599	1.6946	0.00524497	0.0573099	-1.16575	0.129982	0.298104	1.27947	0.0119088	0.0852287	0.255387	0.192863	0.422184	0.444136	0.0420945	0.378043	0.000644996	0.430931	0.837358	0.470472	0.0328767	0.335484	0.444171	0.0669027	0.436549
NM_001002292	WLS	-4.56549	0.921802	0.928348	-2.64286	0.968066	0.98744	-10.7533	0.970832	0.991024	-3.09606	0.996325	0.99968	-1.76975	0.910374	0.95977	-0.489284	0.934455	0.996267	-0.437255	0.850697	0.97989	-0.291795	0.816202	0.959955	-0.633822	0.913542	0.992384
NM_001002296	GOLGA7	-4.43669	0.913369	0.921079	-1.0997	0.812533	0.912727	-15.1965	0.997178	0.999924	-2.15149	0.974431	0.997224	0.700902	0.065676	0.226592	-0.379647	0.883221	0.986722	-0.765118	0.963769	0.999113	-0.313554	0.833374	0.966081	-0.296529	0.710837	0.934923
NM_001002759	SFR1	-1.1227	0.357899	0.474564	0.651573	0.133752	0.355528	-5.45895	0.715151	0.847004	1.0417	0.0249855	0.132034	-0.72512	0.657577	0.81896	-0.906404	0.994416	0.999859	0.113278	0.303885	0.768539	-0.979322	0.99513	0.999918	-0.862338	0.967149	0.998589
NM_001002796	MCTP1	-0.246093	0.142969	0.350599	1.62483	0.00689309	0.0672281	1.40344	0.00803986	0.0493514	0.646276	0.074823	0.257686	0.987616	0.0272406	0.134074	-0.240534	0.775228	0.957565	-0.600866	0.92438	0.991997	0.227606	0.181848	0.61362	-0.370579	0.771551	0.957889
NM_001002810	PDE4DIP	0.204001	0.0681126	0.350599	0.776473	0.100638	0.307888	1.60396	0.00598199	0.0402467	0.65111	0.073897	0.255635	0.179829	0.223144	0.460446	0.0766861	0.363958	0.7743	0.447017	0.0597845	0.46719	0.127002	0.29755	0.710337	0.165299	0.241223	0.681282
NM_001002811	PDE4DIP	NA	NA	NA	NA	NA	NA	NA	NA	NA	NA	NA	NA	NA	NA	NA	-0.464134	0.924955	0.995131	-0.124247	0.57653	0.9	-0.555298	0.949915	0.995668	-0.0911191	0.505606	0.855258
NM_001002836	ZNF787	-0.886905	0.295847	0.429687	-2.05039	0.940468	0.9751	-1.32284	0.145616	0.319879	0.539336	0.0970576	0.298951	-0.713728	0.65272	0.816123	0.176023	0.237542	0.684275	0.0599249	0.362796	0.802576	0.311446	0.109487	0.507806	0.276051	0.154063	0.583237
NM_001002841	MYL4	-0.454316	0.188003	0.359285	1.27093	0.0246377	0.140592	0.496188	0.0265425	0.107626	0.304146	0.164443	0.4073	-0.643937	0.622929	0.796912	-0.165222	0.692601	0.929146	-0.81437	0.971139	0.999863	-0.291807	0.816217	0.959955	-0.545865	0.878246	0.985429
NM_001002877	THOC5	-0.240725	0.141873	0.350599	0.938966	0.0665722	0.245413	0.605947	0.0233507	0.0994803	2.61158	0.000152249	0.00601422	-0.0807841	0.344162	0.581553	-0.256718	0.790491	0.96201	-0.080885	0.526593	0.88009	-0.269868	0.797607	0.954776	-0.355429	0.759789	0.954192
NM_001002879	THOC5	-2.65969	0.700281	0.734812	-1.67487	0.907546	0.959446	-7.60335	0.88848	0.95434	-1.8743	0.955087	0.991199	0.513777	0.107692	0.304571	-0.0349006	0.521354	0.85592	0.0993341	0.318883	0.778239	-0.240589	0.770783	0.947698	-0.114173	0.530691	0.86617
NM_001002901	FCRLB	0.223346	0.0656825	0.350599	1.18601	0.0325146	0.1638	0.78953	0.0185323	0.085675	-1.50185	0.906924	0.979084	0.426333	0.132661	0.342794	0.175953	0.237637	0.684298	0.267375	0.160088	0.639979	0.132605	0.290412	0.704984	0.317448	0.127689	0.551808
NM_001002907	OR8K1	-0.0962957	0.114299	0.350599	-1.59105	0.897558	0.954441	0.876797	0.016463	0.0792937	1.12629	0.019344	0.11342	-0.79722	0.686078	0.836825	0.0438489	0.409838	0.800809	0.288489	0.144666	0.621774	-0.183441	0.711304	0.926521	0.329821	0.120192	0.541023
NM_001002909	GPATCH8	-0.945493	0.311385	0.441576	-0.594358	0.658198	0.825044	-0.313732	0.0632215	0.188411	-1.57879	0.919731	0.982683	-1.29509	0.83488	0.921142	0.0919871	0.343273	0.761675	0.0914579	0.327548	0.782193	0.677772	0.0043497	0.161319	0.956473	0.00192298	0.106049
NM_001002911	GPR139	NA	NA	NA	1.00761	0.0552162	0.220941	NA	NA	NA	1.19548	0.0155252	0.0990096	-0.164072	0.386737	0.619576	-0.565491	0.957004	0.9995	-0.5738	0.914944	0.990946	-0.748437	0.982503	0.999048	-0.313827	0.725867	0.941438
NM_001002912	ERICH3	-0.374906	0.170202	0.351878	-0.153562	0.467311	0.691266	-0.0613858	0.049097	0.160248	-0.419947	0.504966	0.750903	-0.864727	0.711075	0.851354	-0.0583227	0.55441	0.871431	-0.18002	0.637541	0.920029	-0.282965	0.808864	0.957687	-0.321528	0.73252	0.943538
NM_001002913	PTRH1	-0.484611	0.195113	0.363201	0.389819	0.22364	0.467189	-3.57188	0.456415	0.650659	1.64936	0.00359975	0.0401496	-0.405749	0.510139	0.716624	0.17765	0.235631	0.681687	0.482565	0.0476867	0.433104	0.293811	0.122731	0.530223	0.705819	0.0128024	0.229063
NM_001002914	KCTD11	-1.42867	0.436559	0.531654	0.70823	0.117887	0.333632	-3.85316	0.499295	0.686616	-1.60334	0.923494	0.983326	-0.966411	0.746109	0.872168	-0.0474911	0.539207	0.863598	0.135312	0.280655	0.753253	0.157071	0.259824	0.680765	-0.339416	0.747034	0.949754
NM_001002915	IGFL2	0.091149	0.0836162	0.350599	1.26475	0.0251632	0.142128	0.682835	0.0211742	0.0935816	-0.554858	0.57548	0.801563	0.0903342	0.262187	0.502022	-0.180641	0.710813	0.93588	0.830645	0.00313335	0.162831	-0.186551	0.714808	0.927422	-0.0988575	0.514248	0.858812
NM_001002916	H2BW1	0.135379	0.0772889	0.350599	0.900845	0.073808	0.260152	-1.28614	0.141779	0.314846	0.201496	0.20199	0.458383	1.77859	0.00125817	0.0212561	0.223812	0.185325	0.628569	0.314004	0.127175	0.596023	-0.257411	0.786415	0.951147	0.26111	0.164527	0.599233
NM_001002917	OR8D1	-0.947519	0.31193	0.44197	-0.352968	0.558395	0.758098	-3.05232	0.376607	0.578433	0.416384	0.128986	0.353956	-0.80117	0.687571	0.837947	-0.129767	0.649713	0.913745	1.08285	0.000297076	0.0645068	0.331184	0.0958882	0.48527	0.341984	0.113337	0.527137
NM_001002918	OR8D2	-0.203666	0.134491	0.350599	1.49378	0.0111984	0.0873736	2.86461	0.000743756	0.0102979	-0.265913	0.422443	0.685994	-1.45211	0.865661	0.93699	0.169993	0.24449	0.688666	-0.0691246	0.51295	0.873384	-0.517325	0.938909	0.994314	-0.398207	0.791773	0.962913
NM_001002919	ALKAL2	-2.53154	0.677199	0.716233	-2.31278	0.955244	0.982008	-5.69449	0.74079	0.864718	-1.01789	0.780843	0.923517	-1.10102	0.786901	0.893532	-0.144019	0.66717	0.918453	0.00784393	0.422647	0.83297	-0.0794187	0.582623	0.878113	-0.0194843	0.427326	0.813961
NM_001002923	IGFL4	0.0168431	0.0950534	0.350599	2.01572	0.00132858	0.0254137	-3.46809	0.440493	0.637001	2.58886	0.000162677	0.00628692	0.119788	0.249263	0.488603	0.152104	0.26571	0.702396	-0.223169	0.681954	0.933981	-0.0651183	0.56341	0.870915	0.203556	0.208276	0.651869
NM_001002925	OR5AP2	-0.813155	0.276645	0.415185	-1.53007	0.889624	0.951659	-1.20553	0.133778	0.303151	-0.314928	0.448544	0.707588	-0.202097	0.406207	0.636302	0.244085	0.165736	0.607461	-0.394628	0.8239	0.973772	0.284866	0.130007	0.542187	0.132687	0.271083	0.705653
NM_001002926	POLR1F	-0.947883	0.312024	0.44197	0.607735	0.147147	0.375318	-3.54509	0.452286	0.647361	-0.305559	0.443388	0.703932	-0.548615	0.579714	0.766012	-0.00559629	0.479583	0.8373	0.0810447	0.33903	0.789273	-0.0684149	0.567976	0.873484	-0.165488	0.584956	0.88985
NM_001003395	TPD52L1	-0.0426105	0.104831	0.350599	0.942878	0.0658175	0.243868	-0.962392	0.111002	0.269059	-0.283419	0.431638	0.693805	0.631283	0.0792816	0.251799	0.0283898	0.431336	0.811406	0.190565	0.225675	0.709253	-0.207716	0.737777	0.935621	-0.18168	0.601412	0.895079
NM_001003408		-0.252553	0.144265	0.350599	0.084902	0.355678	0.597925	-0.138435	0.0530348	0.167735	-0.269028	0.424044	0.68722	0.385734	0.145511	0.359804	-0.171786	0.700465	0.932131	-0.244809	0.702798	0.941065	-0.314903	0.834434	0.966319	-0.278713	0.695471	0.931063
NM_001003443	OR56A3	-0.405052	0.17686	0.353652	-1.681	0.908244	0.959446	2.33954	0.00187764	0.0188973	-0.180342	0.378111	0.647154	-2.0984	0.939173	0.972426	0.0711094	0.371696	0.779667	0.760237	0.00570667	0.199441	-0.0331352	0.519497	0.849013	-0.0367811	0.446002	0.824418
NM_001003665	STUM	-0.306207	0.155335	0.350599	-0.485454	0.614942	0.796807	2.78022	0.000850984	0.0111735	7.25e-05	0.28915	0.560368	-0.676319	0.637007	0.806505	0.101047	0.330953	0.751895	-0.397883	0.825952	0.974351	-0.591826	0.958882	0.996692	-0.336167	0.744367	0.94804
NM_001003675	LDLRAD4	-0.082075	0.111776	0.350599	0.618577	0.143874	0.370346	-2.07736	0.236101	0.433628	0.706771	0.0639988	0.234551	0.423709	0.133469	0.343842	0.110999	0.317922	0.742352	0.400743	0.0789078	0.514169	0.560075	0.0146529	0.250564	0.402393	0.0836455	0.471087
NM_001003678	C11orf49	-0.12517	0.119578	0.350599	0.612802	0.145585	0.372812	-2.31108	0.267467	0.468974	-0.106845	0.340664	0.612113	1.30444	0.00895285	0.0699117	0.0346788	0.422502	0.806292	0.0490448	0.375097	0.810033	0.343251	0.0881904	0.472683	0.162574	0.243706	0.682556
NM_001003681	HMGXB4	-1.34678	0.415691	0.516517	1.08808	0.0437193	0.193472	-6.83001	0.841352	0.929099	0.29008	0.169368	0.414709	0.0647228	0.273844	0.514132	0.356482	0.0814269	0.472074	0.241638	0.180741	0.661034	0.72202	0.00262347	0.132148	0.228017	0.188817	0.62907
NM_001003682	TMEM200B	-0.891787	0.297172	0.430689	1.16549	0.0346315	0.169977	-0.669607	0.0871015	0.230401	0.932921	0.034646	0.161709	0.0418592	0.284465	0.525222	-0.579179	0.9603	0.999859	-1.25762	0.996578	0.999863	-0.718702	0.979345	0.998987	-1.01165	0.983253	0.999781
NM_001003683	PDE1A	-0.605417	0.224247	0.379067	0.585939	0.154017	0.384375	-1.85747	0.207658	0.400282	0.0519516	0.264838	0.533546	-1.20209	0.813413	0.90917	0.383816	0.0668682	0.442797	0.670252	0.0120597	0.264677	0.0802996	0.359795	0.755689	0.77	0.00808333	0.186735
NM_001003688	SMAD1	-0.780051	0.268127	0.409354	0.948658	0.0647496	0.24147	-4.87847	0.644172	0.797053	0.206937	0.199828	0.455295	0.602677	0.0857392	0.26526	1.13756	2.21e-05	0.0261924	0.53126	0.0343584	0.390587	0.410087	0.0540893	0.404944	0.250569	0.172217	0.610868
NM_001003690	MAD2L1BP	-0.293633	0.15269	0.350599	1.41053	0.0152934	0.105165	-1.39071	0.153001	0.330727	-1.44648	0.896675	0.974645	0.252135	0.194113	0.423757	0.351722	0.084209	0.478988	0.507014	0.040581	0.410665	0.174002	0.23997	0.665149	-0.219672	0.639861	0.912044
NM_001003693	LY6G6F	0.170149	0.0725814	0.350599	0.50272	0.18206	0.419921	2.5293	0.00135747	0.0152295	0.618453	0.080133	0.267772	-0.509835	0.56138	0.754104	0.458805	0.0374537	0.362689	0.0135775	0.416135	0.830069	0.202447	0.208246	0.638763	0.00576447	0.400212	0.798934
NM_001003699	RREB1	-2.81553	0.726885	0.756695	-1.69836	0.910089	0.960599	-9.34474	0.949562	0.984339	0.666348	0.071094	0.24989	-0.885364	0.718366	0.855285	0.0957225	0.338046	0.757616	0.338536	0.111813	0.572126	0.248017	0.161858	0.588044	-0.0710072	0.48344	0.844285
NM_001003702	ARHGEF35	-4.31278	0.90454	0.913181	-3.50289	0.985417	0.995151	-9.90141	0.959655	0.987815	-1.20975	0.841626	0.951165	-2.63706	0.966061	0.984387	0.831057	0.00085309	0.092842	-0.36857	0.805762	0.970048	-0.0198516	0.501241	0.840718	-0.168536	0.588023	0.891057
NM_001003716	RECQL5	0.126796	0.0784932	0.350599	0.745153	0.108311	0.3197	0.565579	0.0245394	0.102606	0.891041	0.0389194	0.174254	-0.130953	0.369967	0.604948	0.086191	0.351176	0.767187	0.19981	0.217217	0.701197	0.033173	0.4256	0.796249	0.188008	0.221463	0.664514
NM_001003745	OR10A3	0.174685	0.0719536	0.350599	0.0189371	0.386334	0.625121	1.45263	0.00741246	0.0464814	-0.639177	0.617849	0.829715	-0.133644	0.371299	0.606068	0.219714	0.189514	0.631493	0.0591831	0.363631	0.802899	0.292421	0.123887	0.532478	0.355051	0.106615	0.514636
NM_001003750	OR8I2	-0.579303	0.217842	0.374519	0.341683	0.242767	0.487553	-1.2126	0.134474	0.304093	-0.80957	0.697588	0.878539	-0.636726	0.619815	0.795204	0.145239	0.274063	0.70953	0.114041	0.303092	0.767761	-0.00135967	0.474706	0.824856	-0.194517	0.614825	0.902476
NM_001003760	KLHL31	0.401243	0.0458806	0.350599	0.721009	0.114577	0.329269	6.23474	2.28e-06	0.000329514	0.381817	0.139464	0.369504	0.653864	0.074631	0.243804	0.502914	0.0256007	0.320593	0.575656	0.0249805	0.348178	0.0299743	0.430175	0.798459	0.496428	0.0497926	0.389089
NM_001003790	ERLIN2	-0.524225	0.204532	0.368045	1.83064	0.00295568	0.0407651	2.58251	0.0012434	0.0143481	1.91922	0.00148078	0.0238944	0.809757	0.0477957	0.188017	-0.36423	0.873873	0.983482	-0.517619	0.892316	0.98709	-0.712792	0.978553	0.998811	-0.502257	0.856331	0.982135
NM_001003794	MGLL	-2.67064	0.702261	0.736272	0.559921	0.162565	0.395353	-10.3246	0.965628	0.989656	0.83047	0.0459875	0.193172	-1.74835	0.907993	0.958578	0.118904	0.307562	0.733414	-0.491126	0.879895	0.985082	-0.0814008	0.585325	0.879303	-0.44175	0.820888	0.970914
NM_001003799		-0.55209	0.211234	0.371214	0.746348	0.10804	0.319103	-2.10725	0.240016	0.438192	-1.11889	0.81469	0.939525	0.27143	0.186507	0.413933	0.559702	0.01545	0.272123	0.314515	0.126799	0.596023	0.00620736	0.463806	0.818005	1.10222	0.000566054	0.0658315
NM_001003801	SMARCD3	-0.453673	0.187853	0.359223	-0.614905	0.666073	0.829968	-0.424618	0.0700819	0.200761	-0.291985	0.436122	0.697438	-0.483185	0.548404	0.745131	-0.220269	0.75477	0.950691	-0.168177	0.624948	0.916169	0.0397126	0.416337	0.791895	-0.0447152	0.454629	0.82883
NM_001003802	SMARCD3	NA	NA	NA	0.912039	0.0715628	0.255725	NA	NA	NA	2.40475	0.000287813	0.0087929	1.57202	0.00301876	0.0360811	0.276107	0.137376	0.571896	0.505087	0.0411551	0.413205	-0.0505866	0.543508	0.860158	0.180489	0.227979	0.670873
NM_001003819	TRIM6-TRIM34	-0.146972	0.123607	0.350599	-0.252648	0.513441	0.726793	-1.27785	0.140919	0.313787	1.01235	0.0273798	0.139596	1.18893	0.0137195	0.0893752	-0.120332	0.637796	0.908975	-0.326651	0.77413	0.960822	-0.260029	0.788868	0.951855	0.119125	0.284163	0.716828
NM_001003827	TRIM34	-0.269637	0.147747	0.350599	2.05761	0.00110365	0.0226499	4.15525	5.7e-05	0.00197245	1.84652	0.00187496	0.0272409	0.0871863	0.263589	0.503508	-0.154947	0.680609	0.924101	-0.415895	0.837712	0.977077	-0.36283	0.867526	0.976116	-0.144876	0.563627	0.881945
NM_001003828	PARVB	-0.218875	0.13751	0.350599	-0.447579	0.599007	0.78641	-4.13304	0.541009	0.72079	4.72153	4.17e-06	0.000718232	-1.01642	0.761839	0.880653	-0.0847317	0.590531	0.888559	0.0919483	0.327016	0.782138	-0.175676	0.702462	0.923205	-0.0885568	0.502808	0.854084
NM_001003841	SLC6A19	0.449404	0.0414284	0.350599	1.57918	0.00823428	0.0741182	-0.6096	0.0825181	0.222347	0.487946	0.109869	0.323142	0.835941	0.0440001	0.178664	0.192592	0.218556	0.663582	0.343457	0.109013	0.568601	0.508005	0.0236935	0.297896	0.753561	0.00903076	0.197282
NM_001003845	SP5	-0.0266933	0.102139	0.350599	1.80326	0.00327942	0.0434645	4.11126	6.16e-05	0.00204082	1.21228	0.014668	0.0956475	0.941634	0.0314627	0.145646	0.0904584	0.345315	0.76227	-0.0449931	0.484368	0.859737	-0.124484	0.641602	0.900773	-0.0277545	0.436217	0.818639
NM_001003892	DUSP29	-0.36253	0.167548	0.351141	0.476008	0.191604	0.430201	-1.03072	0.11731	0.279015	-0.978498	0.766413	0.916396	0.0830913	0.265461	0.505477	0.490632	0.0286096	0.334531	-0.431837	0.847542	0.979483	-0.316861	0.835896	0.966503	0.149492	0.255463	0.691721
NM_001003937	TSPYL6	-0.489238	0.196216	0.36378	0.665765	0.129825	0.350819	-2.83283	0.343469	0.547973	0.340876	0.152382	0.389532	-0.130759	0.369891	0.604909	-0.272204	0.804701	0.966529	-0.729806	0.95739	0.997304	-0.275006	0.802065	0.956655	0.000355315	0.406075	0.801842
NM_001003938	HBM	-0.913838	0.303018	0.434894	1.11173	0.0406354	0.186603	1.60842	0.00593179	0.0400369	0.609594	0.0819766	0.271534	2.14794	0.000223768	0.00708186	-0.796309	0.989042	0.999859	-1.17197	0.994805	0.999863	-0.679227	0.974285	0.998199	-1.00785	0.982938	0.999781
NM_001003940	BMF	-2.07395	0.586436	0.642854	-1.24003	0.842146	0.929287	-6.51705	0.81736	0.914975	-0.893397	0.733166	0.897606	0.354679	0.155945	0.37335	-0.134685	0.6559	0.915105	-0.162324	0.618564	0.913285	0.127911	0.296362	0.709189	0.0526405	0.350728	0.767746
NM_001003942	BMF	-0.40557	0.176974	0.353652	-0.381286	0.570697	0.767265	-2.02985	0.229768	0.426244	1.31281	0.0106699	0.0793249	-0.52396	0.568089	0.758602	0.128479	0.295181	0.724818	0.0601627	0.362527	0.802555	0.296593	0.120599	0.526734	-0.759168	0.948549	0.997236
NM_001004	RPLP2	0.079416	0.0853725	0.350599	0.482227	0.189227	0.427649	-0.106589	0.0513762	0.164466	2.63181	0.000139735	0.00564492	-0.183234	0.396359	0.628325	0.154367	0.263067	0.69993	0.435424	0.064054	0.478188	0.195132	0.21616	0.644353	-0.467259	0.836521	0.97602
NM_001004019	FBLN2	-2.2146	0.615649	0.666255	-1.85514	0.925385	0.967543	-4.42374	0.582456	0.752618	-1.03075	0.785337	0.925477	-1.54875	0.881314	0.944517	-0.793049	0.988811	0.999859	-1.13622	0.993896	0.999863	-0.61311	0.963219	0.996919	-1.2116	0.993432	0.999781
NM_001004052	OR52B2	-2.12788	0.597794	0.652144	-1.13606	0.820803	0.917221	-8.20554	0.916065	0.968343	1.57093	0.00468009	0.0478914	-0.740834	0.664248	0.823222	-0.404072	0.897011	0.990071	-0.619102	0.930185	0.993768	-0.306873	0.828272	0.964713	-0.288162	0.703781	0.932782
NM_001004055	LRRC29	-1.89479	0.547295	0.613683	-0.400075	0.578744	0.772577	-7.54267	0.885261	0.95273	-0.70294	0.648808	0.849591	1.06651	0.0209287	0.113745	0.314514	0.107847	0.523157	0.157395	0.257956	0.736429	0.283884	0.130844	0.543343	-0.0237343	0.431981	0.816368
NM_001004058	OR8K5	-0.387822	0.173013	0.352396	0.626465	0.141419	0.366977	-2.24585	0.258407	0.458473	0.0775564	0.253267	0.520912	-0.00945855	0.308581	0.548514	-0.486268	0.933459	0.995982	-0.275823	0.730976	0.950892	-0.486446	0.928078	0.991591	0.0670229	0.335895	0.755879
NM_001004059	OR4S2	-0.282502	0.15038	0.350599	1.29044	0.0230695	0.13474	-3.41151	0.431997	0.629739	1.12556	0.0194003	0.113513	-0.134504	0.371724	0.606443	0.338143	0.0922321	0.495558	-0.130398	0.583467	0.901632	0.309466	0.110991	0.510539	-0.00216592	0.408729	0.803252
NM_001004063	OR4K1	-0.179384	0.129763	0.350599	0.862936	0.0814368	0.274571	-1.14628	0.128056	0.294892	-0.557456	0.576802	0.802116	0.123264	0.247821	0.487423	0.418295	0.0515025	0.404114	-0.145988	0.600738	0.908317	0.195275	0.215988	0.644225	0.248136	0.174001	0.61249
NM_001004064	OR8J3	-1.67893	0.497651	0.576788	-1.19775	0.833811	0.924775	-4.04289	0.527729	0.710955	0.0381709	0.271189	0.540744	-1.51326	0.875566	0.941773	0.274778	0.1385	0.573189	0.147803	0.267686	0.744745	0.386672	0.0646213	0.430415	0.311858	0.131068	0.557072
NM_001004067	NOMO3	-1.79872	0.525495	0.596726	0.258684	0.277851	0.525477	-5.61073	0.731856	0.858415	-1.2137	0.842668	0.951629	-0.62914	0.616395	0.792956	-0.446533	0.917786	0.994502	-0.437527	0.850868	0.979917	-0.225979	0.756415	0.942443	0.0716443	0.331228	0.752574
NM_001004124	OR4P4	0.395957	0.0464141	0.350599	0.782453	0.0991877	0.305256	2.48203	0.00146698	0.01612	1.08124	0.0222659	0.122695	-0.146742	0.37792	0.612087	0.301141	0.117602	0.541097	0.581984	0.0239407	0.346126	0.0888349	0.348093	0.749089	0.611869	0.0242721	0.29475
NM_001004125	TUSC1	-1.4763	0.44837	0.540147	-2.71884	0.970454	0.988567	-3.45339	0.438334	0.635085	0.442031	0.121958	0.341623	-0.175018	0.392203	0.62464	0.171002	0.243339	0.688321	-0.204532	0.663042	0.928908	0.422461	0.0492016	0.390927	0.535553	0.0394471	0.360208
NM_001004127	ALG11	0.137283	0.0770218	0.350599	2.38246	0.000262774	0.0107	2.9529	0.00060915	0.00889689	1.81502	0.00208769	0.0290746	0.0734314	0.269744	0.510218	0.436663	0.0446638	0.384209	0.114077	0.303052	0.767761	0.0888086	0.348115	0.749089	-0.0904167	0.504793	0.854604
NM_001004134	OR10AD1	0.180797	0.07117	0.350599	-1.18682	0.831711	0.923556	1.67607	0.00532036	0.0374186	1.98121	0.00120131	0.0208815	2.10212	0.000276544	0.0081388	0.21847	0.190821	0.633262	0.0916952	0.327314	0.782193	0.20371	0.206851	0.63759	0.209314	0.203504	0.645543
NM_001004135	OR2A12	-0.475166	0.192914	0.361859	1.21587	0.0295526	0.154763	-2.43837	0.285593	0.488659	-0.401503	0.495022	0.742997	-0.276661	0.444571	0.667842	-0.483154	0.932379	0.995721	-0.471683	0.869919	0.983956	0.0950546	0.33966	0.74366	-0.791587	0.955374	0.997599
NM_001004137	OR52M1	0.0154849	0.0952754	0.350599	0.819895	0.0906759	0.290768	2.21914	0.00222899	0.0208447	0.227245	0.192078	0.445319	1.64113	0.00229257	0.0304847	0.156553	0.260421	0.698155	-0.0274728	0.463912	0.851487	0.0271825	0.434131	0.801225	-0.0943231	0.509231	0.857707
NM_001004195	OR4F4	-0.262843	0.146346	0.350599	-0.0480035	0.417636	0.652371	-0.440904	0.0712112	0.20291	-0.0356622	0.305958	0.57792	-0.5268	0.569467	0.759612	0.456775	0.0380137	0.365369	-0.234243	0.692593	0.937725	0.0326268	0.426407	0.796336	0.0964162	0.306333	0.736631
NM_001004297	OR13A1	-1.22098	0.383401	0.492717	-0.110647	0.447098	0.676813	-3.05275	0.376696	0.578433	-0.817305	0.700944	0.880566	-0.903224	0.724545	0.858674	0.739142	0.00231438	0.129182	0.229631	0.190767	0.672874	0.702877	0.00325977	0.144107	0.201855	0.209775	0.653997
NM_001004298	C10orf90	0.246842	0.0627575	0.350599	1.1737	0.033799	0.167664	2.6461	0.00108826	0.0130982	0.761604	0.0552351	0.214598	1.00846	0.0254779	0.128905	0.273007	0.140011	0.575709	0.173412	0.242183	0.723475	0.128707	0.295374	0.708676	0.412243	0.0795305	0.46353
NM_001004301	ZNF813	0.0217345	0.0942935	0.350599	0.495936	0.184379	0.421856	-0.605998	0.0822603	0.221952	-0.265296	0.422142	0.685719	0.462295	0.121912	0.326283	0.406056	0.0563381	0.416393	0.494645	0.0440997	0.420187	0.45346	0.0380393	0.35363	0.256782	0.167644	0.60327
NM_001004303	FYB2	-1.26906	0.395887	0.501856	0.234721	0.288126	0.536127	-3.5952	0.459934	0.653451	-1.48272	0.903451	0.97767	-0.233049	0.422034	0.648875	0.433883	0.0456453	0.386763	0.0914734	0.327538	0.782193	-0.031932	0.517912	0.848402	0.548942	0.0364061	0.349407
NM_001004304	ZNF740	-1.71953	0.507191	0.583446	-0.306069	0.53744	0.743933	-5.27136	0.693057	0.832171	-0.102882	0.3387	0.610724	-1.1978	0.812332	0.908616	-0.379842	0.883337	0.986722	0.0282922	0.398802	0.822448	-0.327953	0.843876	0.968366	0.305893	0.134673	0.561333
NM_001004306		-0.450196	0.187061	0.359023	0.56284	0.161627	0.394382	-1.73978	0.193048	0.383014	-0.148407	0.361735	0.632144	-0.475433	0.544642	0.743057	0.00486933	0.46484	0.830133	0.104401	0.313371	0.774375	-0.15226	0.675573	0.913443	-0.294161	0.708844	0.934919
NM_001004308	RTL4	-0.163166	0.126665	0.350599	-0.873469	0.753074	0.880978	0.130882	0.0400099	0.141395	0.671769	0.0700783	0.247559	-0.581848	0.595099	0.777849	0.121397	0.304332	0.732073	-0.179992	0.637505	0.920029	0.139201	0.282116	0.700512	-0.310419	0.722897	0.939817
NM_001004309	ZNF774	-0.742145	0.25839	0.402404	0.0234538	0.38426	0.62372	-2.53842	0.300115	0.504023	-0.284932	0.432424	0.694501	-0.168684	0.389002	0.621692	0.178756	0.234347	0.680467	0.324022	0.120862	0.587065	0.21076	0.199191	0.63036	0.110826	0.29224	0.723964
NM_001004310	FCRL6	-0.240348	0.141794	0.350599	-0.238298	0.506893	0.722372	0.176715	0.0381026	0.136621	0.00833773	0.285191	0.556558	-0.908146	0.726424	0.8598	0.417624	0.0517334	0.40509	0.414056	0.0728318	0.500291	0.136404	0.285571	0.702432	-0.308022	0.720797	0.939039
NM_001004311	FIGLA	-0.0782903	0.111098	0.350599	0.631846	0.139771	0.364627	0.166819	0.0384859	0.137623	0.0506384	0.265372	0.533968	0.560753	0.0956842	0.284069	0.157138	0.259747	0.698155	-0.496483	0.882508	0.985186	0.557431	0.0149861	0.251414	-0.531247	0.871424	0.984391
NM_001004312	RTP2	-0.125123	0.119569	0.350599	1.35964	0.0182071	0.116898	-4.65692	0.614413	0.775614	0.647433	0.0746166	0.257204	2.14936	0.000223768	0.00708186	0.142778	0.277062	0.710848	-0.03242	0.469816	0.85415	-0.00630746	0.481803	0.827887	0.284944	0.148258	0.578538
NM_001004313	TMEM220	-2.74333	0.714761	0.746372	1.15163	0.0360946	0.174123	-6.92861	0.848148	0.932773	-2.94174	0.995017	0.99968	-2.2546	0.949148	0.976235	-0.07208	0.573363	0.881025	-1.14811	0.994231	0.999863	-0.0883044	0.594699	0.883871	0.0141224	0.391551	0.79443
NM_001004316	LEKR1	-1.5704	0.471575	0.557231	0.713173	0.116562	0.331509	-4.91944	0.649205	0.800655	-0.928262	0.746871	0.905823	-1.14706	0.799496	0.901382	0.235307	0.17402	0.617072	0.0817005	0.338325	0.789182	0.347143	0.0859182	0.469097	0.342992	0.112835	0.526275
NM_001004317	LIN28B	0.0298787	0.0929896	0.350599	1.16877	0.0342804	0.169009	0.722104	0.0201521	0.0903861	1.57941	0.00455495	0.0471519	0.660797	0.0733074	0.241466	0.148562	0.27001	0.706127	0.0297135	0.397092	0.821008	0.147908	0.271135	0.69137	-0.206669	0.6269	0.907844
NM_001004318	ACP7	-3.53608	0.829657	0.844839	-0.542753	0.63831	0.812688	-13.347	0.991362	0.998593	-0.186062	0.381092	0.64975	-0.068506	0.338013	0.57531	-0.206853	0.74041	0.946109	0.087319	0.332097	0.784214	0.168987	0.245697	0.669848	-0.501102	0.855747	0.98212
NM_001004319	VHLL	0.15478	0.0746421	0.350599	0.735576	0.110781	0.323475	1.7298	0.00491883	0.0354521	0.617731	0.080256	0.267966	0.0097139	0.299546	0.540204	0.174306	0.23956	0.686261	-0.0810084	0.526716	0.880147	0.48349	0.0294463	0.322688	0.0423305	0.361516	0.775876
NM_001004320	AGMO	-0.662644	0.238397	0.387865	-0.557223	0.643782	0.816588	-1.81539	0.202297	0.394073	-1.64434	0.929486	0.984601	1.36637	0.0069326	0.0597189	0.504843	0.0251752	0.319457	0.630678	0.0165981	0.305027	-0.0205403	0.502275	0.841194	0.166263	0.240428	0.680444
NM_001004323	C7orf61	-0.674356	0.241379	0.389824	-0.764724	0.718897	0.862049	-2.24319	0.257994	0.457961	0.393946	0.135754	0.364097	-0.0834595	0.34549	0.58302	0.734193	0.00242478	0.131342	0.798385	0.00415505	0.17956	0.418376	0.0507954	0.394827	0.957332	0.00191093	0.106013
NM_001004325	KRTAP5-2	-1.02419	0.332027	0.455509	-0.43263	0.592787	0.782564	-2.29931	0.265715	0.466934	-0.276256	0.427742	0.690214	1.19732	0.0133353	0.0877886	-0.616891	0.968149	0.999859	-1.50116	0.998912	0.999889	-1.17447	0.998294	0.999918	-0.804221	0.957711	0.998129
NM_001004326		0.0886748	0.0839843	0.350599	0.486504	0.187688	0.425969	-0.0319991	0.0474726	0.156949	0.23902	0.187627	0.43942	0.147331	0.237176	0.476004	-0.0547937	0.549404	0.869292	0.117382	0.299372	0.76549	0.357172	0.0799506	0.459726	-0.0650607	0.476966	0.842092
NM_001004328	ZNF705A	-2.4116	0.654822	0.697838	-0.72793	0.706385	0.854483	-7.02778	0.854824	0.936581	-1.14129	0.8218	0.942382	-0.749395	0.667624	0.82536	0.0991671	0.33342	0.754088	-0.114591	0.565442	0.895859	-0.143967	0.665476	0.909865	-0.327542	0.737437	0.94518
NM_001004329	DBX2	0.19672	0.0690782	0.350599	0.152621	0.324517	0.569595	0.499801	0.0264467	0.107371	1.2491	0.0130559	0.089674	0.221469	0.206196	0.438797	-0.195663	0.727975	0.942463	0.287723	0.145204	0.622284	0.228938	0.180546	0.611921	0.465881	0.0593172	0.417158
NM_001004330		-0.449128	0.18682	0.359023	0.878519	0.0782078	0.268242	-2.99899	0.36841	0.570986	0.323661	0.157955	0.398687	0.00029886	0.304074	0.544535	-0.13963	0.661851	0.917072	-0.0886042	0.535935	0.883577	-0.183992	0.711916	0.926561	-0.575954	0.8913	0.986906
NM_001004333	RNASEK	-2.14032	0.600398	0.654239	-1.34827	0.862216	0.938382	-6.26828	0.7962	0.900431	-1.14116	0.821769	0.942382	0.196425	0.216371	0.451929	0.433722	0.0457035	0.386875	-0.311876	0.761946	0.958593	0.115802	0.311896	0.720199	-0.296007	0.710417	0.934923
NM_001004334	GPR179	-0.323189	0.158977	0.350599	0.888564	0.0762297	0.26462	-2.00823	0.226905	0.423049	0.29211	0.1686	0.413559	-0.4652	0.539582	0.74017	0.128898	0.294623	0.724804	0.32082	0.122879	0.590621	0.313336	0.108078	0.505085	0.30998	0.132182	0.557527
NM_001004339	ZYG11A	-0.0751688	0.110542	0.350599	0.854261	0.0831858	0.277502	-0.463767	0.0727284	0.205544	-1.02339	0.782816	0.924421	0.332221	0.163636	0.383643	-0.162044	0.688875	0.927405	0.0622073	0.360213	0.801242	0.112	0.316986	0.725217	0.108392	0.294621	0.725844
NM_001004341	ETV3L	0.0214937	0.0943273	0.350599	1.33601	0.0197543	0.122868	2.70754	0.000958213	0.0119969	0.525906	0.100367	0.305232	0.509104	0.108963	0.306286	0.266143	0.145904	0.583053	-0.219714	0.678592	0.932648	0.0470892	0.406114	0.785263	-0.00754398	0.41443	0.806326
NM_001004342	TRIM67	-0.13109	0.12069	0.350599	0.444308	0.203236	0.444281	2.82988	0.000791666	0.010779	-1.46096	0.899434	0.975885	0.664361	0.0725495	0.239792	-0.041346	0.530528	0.860339	0.0238287	0.404043	0.823937	-0.288874	0.813722	0.958996	-0.217969	0.638242	0.911505
NM_001004343	MAP1LC3C	-2.62345	0.693894	0.729678	-0.805995	0.732391	0.870168	-7.83025	0.900033	0.960747	-1.14287	0.822248	0.942586	-0.714675	0.65311	0.816257	0.498589	0.0266284	0.325836	0.00166426	0.429793	0.836747	0.643913	0.00633286	0.189714	0.518116	0.0437969	0.373233
NM_001004351	SPDYE3	-1.23447	0.386908	0.495284	0.688664	0.123209	0.341332	-3.3476	0.422186	0.620434	-0.402462	0.495539	0.743437	-1.87648	0.921071	0.964824	0.102848	0.328482	0.750648	-0.124378	0.576681	0.9	0.114147	0.314148	0.721786	0.449916	0.0647951	0.430676
NM_001004352	AL353753.1	-2.09997	0.591931	0.647483	-0.598332	0.659785	0.825965	-6.18231	0.788484	0.895305	-1.55454	0.915846	0.981224	-0.0646971	0.336079	0.573547	0.0219766	0.44054	0.817163	-0.0842908	0.530612	0.881304	0.156888	0.260079	0.68094	-0.338144	0.745998	0.949062
NM_001004354	NRARP	NA	NA	NA	-2.45954	0.96154	0.984846	NA	NA	NA	-1.16151	0.827823	0.944957	-2.78354	0.970646	0.986889	1.26179	6.02e-06	0.012988	0.0310433	0.395579	0.820305	0.686843	0.00386997	0.152754	1.26719	0.000134488	0.0343089
NM_001004356	FGFRL1	NA	NA	NA	NA	NA	NA	NA	NA	NA	NA	NA	NA	NA	NA	NA	0.730941	0.00252515	0.133428	0.391213	0.083368	0.522165	0.235219	0.174271	0.602469	0.165159	0.241386	0.681528
NM_001004358	FGFRL1	NA	NA	NA	NA	NA	NA	NA	NA	NA	NA	NA	NA	NA	NA	NA	-0.400601	0.895162	0.989472	-0.990348	0.987709	0.999863	-0.559157	0.950867	0.995712	-0.432586	0.815073	0.968818
NM_001004360	DPP10	-4.43951	0.913572	0.921241	-4.91844	0.995188	0.998475	-10.6258	0.969385	0.990542	-0.24824	0.413306	0.677152	-1.96558	0.929084	0.968063	0.480504	0.0312452	0.345913	-0.0459642	0.485436	0.860182	-0.275649	0.802621	0.956655	-0.101266	0.516789	0.860167
NM_001004431	METRNL	-0.00441326	0.0984596	0.350599	-0.111562	0.447487	0.676943	2.68705	0.00100384	0.0123927	-1.29552	0.864098	0.961448	1.12764	0.0170592	0.101106	0.0919281	0.343358	0.761675	-0.228918	0.687504	0.93591	0.100115	0.33292	0.739631	0.0192219	0.386279	0.790712
NM_001004432	LINGO4	-0.323773	0.159112	0.350599	1.72719	0.00458278	0.0527149	1.15118	0.0114301	0.061862	-1.12748	0.817441	0.941025	-1.2199	0.817679	0.911063	-0.0881953	0.595296	0.890785	-0.313726	0.763419	0.958933	-0.272262	0.799693	0.955371	-0.620908	0.908887	0.991148
NM_001004439	ITGA11	-2.16254	0.604959	0.657676	-0.572792	0.649888	0.820597	-7.67585	0.892381	0.95616	0.457998	0.117705	0.33546	-0.859529	0.709204	0.849906	-0.386608	0.887382	0.988156	-0.495494	0.882049	0.985186	-0.234873	0.765218	0.945317	-0.992789	0.981808	0.999781
NM_001004441	ANKRD34B	-0.439967	0.184796	0.357939	1.11468	0.0403053	0.18606	-1.3647	0.150163	0.32667	-0.335878	0.459621	0.716098	-1.17397	0.806354	0.905024	-0.0191606	0.499074	0.847286	-0.197075	0.655324	0.927017	-0.236622	0.766943	0.946166	-0.0010142	0.4075	0.802473
NM_001004450	OR1B1	-0.0169359	0.100526	0.350599	1.10012	0.0421742	0.190543	-1.95937	0.220471	0.416287	0.923603	0.0355512	0.164576	-0.1321	0.370565	0.605389	0.190105	0.22141	0.66755	-0.0118436	0.445369	0.843152	-0.0186607	0.499569	0.839579	0.506909	0.0468921	0.381292
NM_001004451	OR1J1	-0.610888	0.225565	0.379516	-0.937056	0.77138	0.89127	-1.99062	0.224591	0.420796	0.338536	0.153133	0.390762	0.145589	0.237904	0.476676	0.319137	0.104633	0.517602	0.280481	0.150539	0.631684	0.23353	0.175987	0.605549	0.0995816	0.303214	0.734014
NM_001004452	OR1J4	0.120126	0.0794339	0.350599	1.38141	0.0169899	0.112863	0.0391163	0.0442466	0.150171	-0.899532	0.735834	0.899068	0.241763	0.198103	0.42917	0.0329901	0.424833	0.80677	0.208268	0.209529	0.693488	0.476222	0.0313733	0.329248	-0.236975	0.656978	0.918126
NM_001004453	OR1L6	-1.76681	0.518245	0.591488	-0.00178149	0.396042	0.6338	-7.23048	0.86742	0.943784	-0.238563	0.408248	0.673197	0.403581	0.139805	0.352171	-0.402524	0.89615	0.989588	-0.0443271	0.483584	0.859474	-0.629401	0.96628	0.997539	-0.61195	0.905604	0.990721
NM_001004454	OR1L8	0.240103	0.063581	0.350599	0.368195	0.231945	0.476183	-0.687118	0.0883951	0.232425	0.662168	0.071899	0.252032	0.617167	0.0823658	0.258166	0.348505	0.0860918	0.483091	0.712932	0.0084767	0.232675	0.248955	0.160981	0.587569	0.911764	0.00272388	0.119013
NM_001004456	OR1M1	-1.43255	0.437508	0.532254	-0.85312	0.746982	0.877854	-2.10038	0.239117	0.437284	-1.73933	0.94137	0.988196	-1.03736	0.768349	0.883445	0.467268	0.0349546	0.356534	0.172263	0.243253	0.724295	0.484778	0.0291352	0.322553	0.270769	0.157636	0.589055
NM_001004457	OR1N2	-0.458491	0.18898	0.359885	1.22323	0.0288841	0.152947	3.12681	0.000428914	0.00711573	0.677048	0.0691627	0.245882	-0.0743038	0.340823	0.577883	-0.23663	0.771344	0.95607	-0.688808	0.948973	0.996262	-0.337369	0.850623	0.970568	-0.571157	0.889328	0.986457
NM_001004458	OR1S1	-0.0590143	0.107693	0.350599	0.421554	0.211712	0.454488	-0.23308	0.0583301	0.178479	-0.479247	0.536314	0.774254	0.236141	0.200285	0.432165	-0.0818314	0.586681	0.887142	-0.269404	0.725227	0.948567	0.225443	0.18403	0.615265	-0.110264	0.526514	0.864084
NM_001004459	OR1S2	-0.25724	0.145212	0.350599	0.14109	0.329889	0.574437	0.00831711	0.0456953	0.153298	0.372354	0.142394	0.374104	-1.55072	0.881627	0.944632	-0.217921	0.752337	0.950533	-0.361261	0.800385	0.968302	-0.21064	0.740881	0.937461	0.224757	0.19131	0.631761
NM_001004460	OR10A2	-0.543586	0.209167	0.370064	-0.0184168	0.403732	0.641056	-1.5752	0.173681	0.358557	0.636783	0.0765332	0.26094	-0.636051	0.619499	0.79511	-0.496382	0.936881	0.99683	-0.8363	0.973976	0.999863	-0.570829	0.953849	0.995869	-0.270832	0.688205	0.928589
NM_001004461	OR10A6	0.446804	0.0416679	0.350599	0.733927	0.111195	0.324154	0.526386	0.0256573	0.105523	0.283581	0.17171	0.418207	0.483013	0.115908	0.31703	0.575816	0.013262	0.259317	0.459499	0.055228	0.454893	0.216909	0.192804	0.62467	0.53499	0.0395936	0.360208
NM_001004462	OR10G4	-0.144887	0.123223	0.350599	-0.266968	0.519807	0.731224	1.87671	0.00389901	0.030253	-0.785801	0.686993	0.872494	0.386957	0.145122	0.359507	-0.0466898	0.538145	0.863427	-0.400848	0.827907	0.974443	-0.116882	0.631907	0.897611	-0.0151271	0.422702	0.811657
NM_001004463	OR10G7	-1.28172	0.399127	0.504412	0.861982	0.0816302	0.274845	-5.43623	0.712545	0.845566	-1.36286	0.879638	0.968099	0.810209	0.0476965	0.187836	-0.342944	0.859748	0.979817	0.129184	0.286969	0.758292	-0.408586	0.893602	0.982172	0.0105767	0.39527	0.79679
NM_001004464	OR10G8	-0.236192	0.140951	0.350599	0.655008	0.132821	0.354658	-0.210275	0.0569589	0.175377	0.963677	0.0316407	0.152628	1.33139	0.00804933	0.0657063	-0.200804	0.733699	0.944114	-0.261607	0.718288	0.946957	-0.488801	0.928968	0.991591	0.00644341	0.399471	0.798505
NM_001004465	OR10H4	-1.96376	0.56269	0.625336	-0.271928	0.522138	0.732336	-7.067	0.857327	0.938021	-0.0028546	0.290556	0.562012	-0.513252	0.563008	0.755	-0.224008	0.758654	0.951677	0.142293	0.273412	0.747814	-0.24968	0.77938	0.949321	-0.279366	0.696005	0.931063
NM_001004466	OR10H5	-0.0998371	0.114955	0.350599	2.28652	0.000418336	0.0141207	2.80971	0.000814481	0.0109546	-0.690708	0.642743	0.845516	-0.103134	0.355433	0.592277	-0.194894	0.727098	0.941975	0.0933456	0.325403	0.781648	-0.317197	0.836126	0.966503	0.0193975	0.386073	0.790712
NM_001004467	OR10J3	0.227358	0.0651784	0.350599	1.5139	0.010389	0.0838385	3.35532	0.000266931	0.00514266	3.07248	4.8e-05	0.00311569	2.69779	1.27e-05	0.00114015	-0.128676	0.648164	0.91263	0.27013	0.158036	0.638162	0.110848	0.31862	0.72685	0.657128	0.0180174	0.261751
NM_001004469	OR10J5	0.0908028	0.0836649	0.350599	3.14736	2.1e-06	0.000397831	3.0261	0.000529298	0.00813948	0.348739	0.149869	0.385642	-0.0610671	0.334289	0.572206	0.146635	0.272429	0.707927	0.0485613	0.375665	0.810175	0.0234092	0.439491	0.804378	0.144606	0.259821	0.695739
NM_001004470	ST8SIA6	-2.83752	0.730517	0.759781	0.669062	0.128862	0.349619	-13.177	0.990518	0.998293	-2.07752	0.970437	0.99585	3.23538	4.22e-06	0.000579124	-0.255744	0.789612	0.96201	0.0240135	0.403829	0.823806	0.477896	0.0309297	0.327239	-0.381647	0.779881	0.959044
NM_001004471	OR10Q1	0.283375	0.0584137	0.350599	0.496059	0.184312	0.421827	2.5364	0.00133237	0.0150142	0.245858	0.185122	0.436197	-0.799628	0.686965	0.837455	0.32582	0.100097	0.511037	0.495739	0.0437705	0.418648	0.169877	0.244685	0.669414	0.142062	0.262368	0.697585
NM_001004472	OR10R2	0.0624313	0.0879013	0.350599	1.83253	0.00292835	0.0406255	1.95048	0.00351117	0.028235	0.592677	0.0854096	0.278274	2.63003	2.11e-05	0.00153459	0.270904	0.141812	0.57809	0.129418	0.28671	0.758292	0.0886889	0.348283	0.749089	-0.239286	0.659184	0.919303
NM_001004473	OR10K1	0.172124	0.0722919	0.350599	0.6405	0.137006	0.360345	0.685498	0.0210989	0.0933609	1.21841	0.0143781	0.0946234	0.246812	0.196251	0.426688	0.2408	0.168779	0.609945	0.230499	0.189982	0.671833	0.126468	0.298211	0.710845	0.090728	0.312044	0.74055
NM_001004474	OR10S1	-0.510887	0.201323	0.366208	-0.65079	0.679561	0.838085	-1.3047	0.143679	0.317259	-0.687286	0.641093	0.844418	0.599229	0.0865182	0.266476	-0.164008	0.691163	0.928679	0.179293	0.236416	0.715932	-0.110201	0.623411	0.894356	0.0422	0.36166	0.775876
NM_001004475	OR10T2	-0.0256146	0.101968	0.350599	2.5537	0.000113518	0.00704546	4.4776	2.05e-05	0.000924116	1.80337	0.00217945	0.0298549	0.376738	0.148401	0.363532	0.0118886	0.45493	0.824758	0.383522	0.0871436	0.529039	-0.421157	0.900037	0.983936	-0.0767115	0.489719	0.84826
NM_001004476	OR10K2	-0.47596	0.1931	0.361973	0.718436	0.115221	0.330076	-5.2081	0.68543	0.82615	1.10678	0.0206203	0.117997	1.47905	0.00442893	0.0454611	0.167908	0.246876	0.691213	0.125128	0.291353	0.761011	0.285708	0.129305	0.540383	0.0761665	0.326631	0.749145
NM_001004477	OR10X1	-0.56138	0.213483	0.372244	-2.16239	0.947349	0.978783	0.84557	0.0171771	0.0814374	1.51555	0.00555813	0.0530577	-2.44425	0.958544	0.981022	-0.112548	0.627856	0.905282	-0.732243	0.957819	0.997312	-0.0066403	0.482213	0.827942	0.185096	0.224035	0.667844
NM_001004478	OR10Z1	-1.15855	0.367258	0.481399	-0.253587	0.513845	0.727073	-2.59729	0.308602	0.513013	0.623136	0.0792091	0.265919	-2.40648	0.956901	0.980422	-0.309238	0.835105	0.974007	-0.331838	0.778233	0.962138	0.109921	0.319811	0.727748	-0.225945	0.645881	0.914128
NM_001004479	OR11H4	0.359591	0.0500336	0.350599	2.03194	0.00122558	0.0240409	1.49634	0.00696529	0.0444999	2.04237	0.000969805	0.0182679	1.00129	0.0260711	0.130435	0.520589	0.0219033	0.305147	-0.00535491	0.437792	0.840601	0.438284	0.0432521	0.370454	0.484844	0.053209	0.4015
NM_001004480	OR11H6	-0.476291	0.193177	0.361973	1.27036	0.0246776	0.140681	-3.12289	0.387627	0.588309	0.331977	0.155261	0.394281	1.05792	0.0215198	0.115892	-0.257565	0.791254	0.962131	-0.878541	0.978771	0.999863	-0.645398	0.969112	0.998061	-0.12366	0.541005	0.870743
NM_001004481	OR13C2	0.159473	0.0740187	0.350599	0.535794	0.17066	0.405678	3.08403	0.000467699	0.00748929	0.692421	0.0664765	0.239692	-0.0795781	0.343584	0.581062	0.293029	0.123855	0.549892	-0.0950626	0.543238	0.885685	0.193072	0.218336	0.64676	0.246852	0.174939	0.613249
NM_001004482	OR13C5	-1.33757	0.413287	0.51481	0.526607	0.173719	0.409518	-2.25711	0.260027	0.460165	-0.174684	0.375152	0.644812	-0.677079	0.637335	0.806565	-1.26879	0.999362	0.999859	-1.22763	0.996038	0.999863	-1.55258	0.999755	0.999918	-1.30127	0.995624	0.999781
NM_001004483	OR13C8	-0.0805133	0.111496	0.350599	0.693077	0.121952	0.339479	3.23538	0.000342219	0.00607418	1.06317	0.0234234	0.126665	0.890749	0.037211	0.162029	-0.14069	0.663128	0.917547	-0.193436	0.651325	0.925366	0.0328057	0.426146	0.796336	-0.0207328	0.428739	0.814595
NM_001004484	OR13D1	-1.12571	0.358666	0.47521	0.708497	0.117824	0.333518	-5.67498	0.73875	0.863581	-0.19687	0.386587	0.654511	0.660518	0.0733749	0.241495	0.0978785	0.33526	0.755492	-0.0503338	0.490569	0.862768	0.199863	0.210946	0.640443	0.110285	0.292758	0.724263
NM_001004485	OR13F1	0.325023	0.0536974	0.350599	-0.658378	0.682119	0.839399	2.77273	0.000855547	0.0111935	0.186732	0.207759	0.4655	0.0929413	0.261022	0.500706	0.130383	0.292754	0.723952	0.330595	0.116753	0.580889	0.30895	0.111344	0.510948	0.530166	0.0406997	0.363531
NM_001004486	OR13H1	NA	NA	NA	-7.4135	0.998747	0.999826	-13.5406	0.992221	0.998957	-1.23101	0.847384	0.953518	NA	NA	NA	-0.0338651	0.519931	0.855409	-0.453938	0.860091	0.981446	-0.168145	0.693815	0.92003	-0.764522	0.94976	0.997236
NM_001004487	OR13J1	-0.200017	0.133762	0.350599	0.0476833	0.373053	0.613771	-1.19581	0.132868	0.30211	-0.0647728	0.31996	0.591316	0.412835	0.136921	0.34885	0.225777	0.183473	0.626946	0.472434	0.0508241	0.442009	0.276207	0.137109	0.553122	-0.307289	0.720179	0.938586
NM_001004488	OR2A25	-1.20217	0.378613	0.489309	-1.00526	0.789423	0.900593	-0.277204	0.0609355	0.183689	-1.64877	0.930082	0.984868	-1.87743	0.921158	0.964827	0.356074	0.0816537	0.472074	0.353834	0.102917	0.558023	0.40995	0.0541415	0.405207	0.765094	0.00833022	0.189305
NM_001004489	OR2AG1	-0.627288	0.229605	0.38156	-0.0317146	0.410045	0.646308	1.23761	0.0102027	0.0576898	-0.179298	0.377546	0.646777	-3.15284	0.97947	0.990569	-0.682968	0.978265	0.999859	-0.525804	0.896051	0.98796	-0.39907	0.888497	0.981451	-0.901309	0.97243	0.999748
NM_001004490	OR2AG2	-0.280414	0.149944	0.350599	-0.177633	0.478656	0.70046	-0.710691	0.0902751	0.23547	0.684051	0.0678822	0.242759	0.837016	0.0438544	0.17839	-0.107278	0.621086	0.902129	-0.335766	0.781252	0.963054	-0.271437	0.798964	0.955205	-0.407176	0.797995	0.963924
NM_001004491	OR2AK2	-0.988612	0.322632	0.448566	0.301942	0.259364	0.505584	-2.15891	0.246724	0.445834	-0.37659	0.481444	0.73186	-1.72089	0.904757	0.956781	1.07705	3.81e-05	0.0280132	1.28258	3.41e-05	0.019049	1.09309	2.01e-05	0.015874	0.771791	0.007993	0.186281
NM_001004492	OR2B11	-1.04408	0.337221	0.459508	1.0103	0.054781	0.219758	-5.91811	0.763449	0.879186	0.675745	0.0693796	0.246254	0.0557343	0.27807	0.518393	-0.0739198	0.575946	0.88274	-0.131083	0.584264	0.902041	0.222353	0.187144	0.619331	-0.0633035	0.475126	0.840382
NM_001004684	OR2D3	0.0590635	0.0884299	0.350599	-0.246968	0.510717	0.724863	-0.243261	0.0589506	0.179508	0.330663	0.155678	0.394951	1.58728	0.00284355	0.0346886	-0.477484	0.930231	0.995721	0.034435	0.391679	0.81888	0.537758	0.0180271	0.26885	0.141545	0.262775	0.698135
NM_001004685	OR2F2	-0.357495	0.166429	0.351141	-0.196075	0.487336	0.707445	-1.70519	0.188923	0.377607	0.830358	0.0459938	0.193172	-0.359071	0.486443	0.698958	0.110802	0.318158	0.742518	0.268142	0.159516	0.63913	0.275501	0.137696	0.554262	0.398709	0.0852734	0.473998
NM_001004686	OR2L2	-0.128648	0.120228	0.350599	-0.186532	0.482899	0.704022	-1.67239	0.184988	0.372911	0.97873	0.0302266	0.148221	0.365599	0.15216	0.368434	0.593578	0.0110882	0.239587	-0.26029	0.717069	0.946342	0.0374926	0.419543	0.793546	0.578722	0.0301253	0.321978
NM_001004687	OR2L3	-0.320317	0.158348	0.350599	0.583633	0.154756	0.385359	-1.29388	0.142591	0.315781	-0.141918	0.358436	0.628981	-0.42911	0.521767	0.726282	0.0735508	0.368222	0.776728	-0.364856	0.803049	0.968899	-0.0607152	0.557252	0.86722	-0.597787	0.900208	0.988949
NM_001004688	OR2M2	-1.34069	0.414092	0.515259	0.526003	0.17395	0.409785	-5.35326	0.702751	0.838973	-0.668069	0.631946	0.838838	0.13257	0.243652	0.482767	0.641351	0.00687691	0.198727	0.125124	0.291355	0.761011	0.23225	0.1772	0.606647	0.305201	0.13511	0.562079
NM_001004689	OR2M3	-1.0945	0.350512	0.468871	-0.939381	0.77203	0.891632	-1.4014	0.15419	0.332369	-0.868479	0.722945	0.891635	-1.16875	0.805039	0.904223	0.183742	0.22858	0.675266	-0.0867596	0.533532	0.88191	0.0983836	0.335248	0.740781	-0.00090775	0.407392	0.802473
NM_001004690	OR2M5	-1.73479	0.510812	0.586128	-2.04501	0.940083	0.974924	-3.4812	0.442348	0.6386	0.655937	0.0729961	0.253882	-2.06888	0.937018	0.971392	0.589698	0.0115318	0.244496	0.0796953	0.340658	0.790598	0.538255	0.0179267	0.268674	-0.257099	0.675629	0.924646
NM_001004691	OR2M7	0.150308	0.0752791	0.350599	1.33676	0.0196975	0.122581	-2.95823	0.362458	0.566049	0.853446	0.0431428	0.185216	1.36925	0.00684394	0.0592154	0.467073	0.0350289	0.35675	0.282756	0.148859	0.628424	0.146641	0.272702	0.692483	0.30346	0.136166	0.562996
NM_001004692	OR2T12	-1.12562	0.358647	0.47521	-1.22337	0.83902	0.927922	-3.57994	0.457668	0.651645	0.427872	0.125728	0.348201	-0.127045	0.367869	0.603188	-0.0193476	0.499337	0.847399	-0.0398271	0.478337	0.857899	0.02282	0.440368	0.804798	-0.276097	0.693103	0.930346
NM_001004693	OR2T10	-0.158074	0.125693	0.350599	1.19569	0.0315371	0.16077	-1.01288	0.115547	0.276337	0.311808	0.16192	0.40333	2.87834	6.33e-06	0.000748406	-0.0706409	0.5714	0.879968	-0.0596177	0.501541	0.868035	-0.229011	0.75946	0.94332	-0.273027	0.690224	0.928971
NM_001004694	OR2T29	-0.438719	0.184504	0.357683	0.584879	0.154377	0.384918	-1.73778	0.192813	0.38273	-0.772503	0.680938	0.86861	0.170532	0.227038	0.464698	0.0294846	0.429777	0.810014	0.0769671	0.343572	0.791461	0.0362573	0.421365	0.794317	0.233817	0.184403	0.624075
NM_001004695	OR2T33	-0.246732	0.143099	0.350599	0.837887	0.0866797	0.283812	-0.744887	0.0928052	0.24017	-0.434567	0.512812	0.757056	-0.64536	0.623603	0.797437	-0.312201	0.837507	0.974405	-0.104569	0.554113	0.891458	-0.122317	0.638718	0.899365	-0.444195	0.822434	0.971369
NM_001004696	OR2T4	-1.95268	0.560245	0.623371	-0.557877	0.644013	0.816617	-4.75521	0.627785	0.785904	-1.19401	0.837219	0.949312	-1.30364	0.836641	0.922069	-0.0144909	0.492351	0.842822	-0.219173	0.678054	0.932648	0.313626	0.107904	0.504933	-0.339078	0.746751	0.949497
NM_001004697	OR2T5	-1.53284	0.462391	0.550816	0.285153	0.266461	0.512629	-6.97488	0.85121	0.9348	0.927991	0.0351528	0.163286	-0.369616	0.491718	0.703185	0.213693	0.195737	0.638997	0.168606	0.246876	0.726419	0.0659166	0.379522	0.768601	-0.160185	0.579376	0.887519
NM_001004698		NA	NA	NA	0.132091	0.333996	0.578492	NA	NA	NA	0.844671	0.0442314	0.18826	0.136365	0.241925	0.481219	0.00146174	0.469649	0.832824	-0.0855496	0.532099	0.881304	0.134411	0.288166	0.70363	0.195803	0.214835	0.659721
NM_001004699	OR2Z1	-1.68794	0.499774	0.578	-0.203028	0.490673	0.71026	-6.00935	0.772351	0.885422	-0.949588	0.755309	0.910391	0.410224	0.137736	0.34975	-0.119091	0.636098	0.908137	0.844171	0.0027881	0.155612	0.484887	0.0291031	0.322348	-0.018739	0.426568	0.813941
NM_001004700	OR4C11	0.143714	0.0761917	0.350599	1.47142	0.0122453	0.0922015	0.981511	0.0143663	0.0724977	0.47961	0.111999	0.326753	0.841938	0.0431746	0.176623	0.300463	0.11813	0.541885	-0.0286279	0.465235	0.852289	0.370567	0.0726222	0.444092	-0.0675469	0.479662	0.842906
NM_001004701	OR4C16	0.00821204	0.0964191	0.350599	1.33812	0.0196113	0.122276	-3.56852	0.455966	0.650428	0.525454	0.10047	0.305293	1.73779	0.00150516	0.0238057	0.230357	0.17889	0.622585	0.283523	0.148323	0.627844	-0.0401615	0.529355	0.854537	-0.235665	0.655697	0.917889
NM_001004702	OR4C3	-0.656019	0.236776	0.386573	-0.222362	0.499359	0.716455	-2.7976	0.338019	0.542157	0.430051	0.125157	0.347021	-0.0341682	0.32078	0.560175	-0.401544	0.895632	0.989472	-0.348051	0.790602	0.965537	-0.228412	0.758839	0.94331	-0.0733611	0.485943	0.845921
NM_001004703	OR4C46	-0.0981441	0.114637	0.350599	1.21519	0.0296136	0.154763	3.18481	0.000387848	0.00663878	1.55428	0.00492202	0.049301	0.936886	0.0319419	0.147096	-0.279412	0.810843	0.967863	-0.241366	0.699411	0.939779	0.165134	0.250033	0.673664	-0.0369319	0.446171	0.824537
NM_001004704	OR4C6	0.0321283	0.0926408	0.350599	0.791286	0.0970519	0.301053	0.914844	0.0157466	0.0769503	2.29315	0.000460918	0.0122001	-0.49547	0.55458	0.749794	0.234083	0.175255	0.618575	-0.488231	0.878422	0.985082	0.403069	0.0571543	0.413537	-0.0204073	0.42839	0.814551
NM_001004705	OR4D10	-1.29302	0.402019	0.506633	1.24524	0.0267609	0.146759	-4.98954	0.658132	0.807026	-0.911108	0.740213	0.901948	-0.516681	0.564663	0.756358	0.0582852	0.389553	0.789792	-0.359828	0.799267	0.967776	0.537584	0.0180411	0.26886	0.519051	0.043544	0.372476
NM_001004706	OR4D11	-1.80735	0.527494	0.59844	-0.561803	0.645575	0.817655	-6.75851	0.836093	0.925697	-1.19977	0.838877	0.950076	1.2907	0.00944472	0.0723232	0.946908	0.000214778	0.0547915	0.447123	0.0597504	0.467077	0.6646	0.00500206	0.171	-0.0428777	0.452634	0.827735
NM_001004707	OR4D2	-0.570737	0.215734	0.373502	-0.57813	0.652014	0.821874	-0.120508	0.0520971	0.166029	-0.362604	0.473959	0.727007	-1.2217	0.818093	0.911304	-0.0843956	0.590081	0.888405	-0.395832	0.824679	0.973999	-0.0627286	0.560088	0.869287	-0.0588298	0.47025	0.837675
NM_001004708	OR4D6	-1.46849	0.446444	0.538831	-1.52339	0.888767	0.951543	-3.60098	0.460875	0.654274	-0.688007	0.641439	0.844664	-0.061584	0.334563	0.572359	-0.0759186	0.578768	0.883659	-0.246584	0.704411	0.941477	0.201512	0.209223	0.639091	-0.550579	0.880368	0.985446
NM_001004711	OR4D9	0.232322	0.0645233	0.350599	1.76234	0.00395002	0.0482274	-4.31451	0.567267	0.741771	2.02335	0.00103863	0.0190708	1.71328	0.00170148	0.0258635	0.119919	0.306267	0.733282	0.0593866	0.363376	0.802675	0.209424	0.20069	0.631316	0.540557	0.038307	0.357096
NM_001004712	OR4K14	-5.11254	0.950299	0.95438	-5.74334	0.997322	0.999443	-7.69296	0.893267	0.956898	-1.19705	0.838128	0.949822	-5.81684	0.998472	0.999438	-0.170413	0.698903	0.931544	0.551077	0.0297819	0.372005	-0.0774096	0.579964	0.877304	-0.340795	0.748178	0.949938
NM_001004713	OR1I1	-0.784757	0.269368	0.410315	0.0534503	0.370425	0.611539	-2.5218	0.29771	0.501432	-0.232359	0.40504	0.670432	-0.43832	0.526394	0.729682	-0.14903	0.673431	0.920486	0.0712488	0.349976	0.794218	-0.0325523	0.518719	0.848438	-0.0242768	0.432555	0.816617
NM_001004714	OR4K13	0.171248	0.0724208	0.350599	-0.582972	0.653918	0.82303	0.712286	0.0204191	0.0912293	0.844494	0.0442481	0.188262	0.290133	0.17934	0.405009	0.26021	0.151109	0.592027	-0.116124	0.567164	0.897065	0.125109	0.300007	0.712479	0.415797	0.0780853	0.45981
NM_001004715	OR4K17	-1.2402	0.388378	0.496183	0.346932	0.240627	0.485502	-5.05946	0.666898	0.812813	-0.341032	0.462384	0.717799	0.0927551	0.261106	0.500796	0.055078	0.394075	0.793358	0.468404	0.052193	0.445876	0.32723	0.0984875	0.490577	0.0765165	0.3263	0.748836
NM_001004717	OR4L1	-1.06419	0.342528	0.462952	0.363624	0.233705	0.477714	-2.19893	0.252129	0.451873	-1.41612	0.890641	0.972353	-1.00535	0.75832	0.878391	-0.110265	0.62494	0.904232	-0.58	0.917162	0.991284	-0.405774	0.892127	0.982172	-0.285363	0.70134	0.932142
NM_001004719	OR4M2	-0.0464357	0.105489	0.350599	0.484067	0.188546	0.42682	0.0505473	0.043731	0.149177	-0.584661	0.590601	0.811739	-0.135696	0.372319	0.60706	0.553299	0.0164335	0.276548	0.548413	0.0303559	0.374591	0.599698	0.00984755	0.219994	0.219286	0.19566	0.636156
NM_001004720	NCK2	0.229228	0.0649357	0.350599	-0.515817	0.627393	0.805586	1.1369	0.0116788	0.0628538	-0.346745	0.465379	0.720086	0.847472	0.0425181	0.175122	0.273039	0.139991	0.575709	0.304923	0.133299	0.60483	0.41912	0.0504963	0.393679	-0.0801708	0.493516	0.850057
NM_001004723	OR4N2	-0.253616	0.144483	0.350599	-1.05965	0.802953	0.907864	-0.333819	0.0643851	0.190619	1.75504	0.00253818	0.0322494	-1.37604	0.851635	0.929625	-0.362021	0.87246	0.983191	0.12303	0.293481	0.761299	-0.259235	0.788113	0.951503	0.413292	0.0790909	0.462403
NM_001004724	OR4N5	-1.29224	0.401823	0.506501	-0.800299	0.730598	0.869173	-3.85973	0.500322	0.68774	-0.266067	0.422545	0.68605	-0.242885	0.42732	0.653558	-0.658897	0.974985	0.999859	-0.403696	0.829777	0.974736	-0.707551	0.977922	0.998765	-0.819828	0.96038	0.998423
NM_001004725	OR4S1	0.105734	0.0815147	0.350599	-0.457719	0.603323	0.7891	1.68926	0.0052177	0.036908	-0.496838	0.545654	0.780544	0.036473	0.28697	0.527854	0.475584	0.032574	0.347659	-0.028853	0.465494	0.852289	-0.123287	0.63998	0.900201	0.0994931	0.30329	0.734014
NM_001004726	OR4X1	-0.417307	0.179667	0.355328	-0.0863832	0.435776	0.66834	-1.99065	0.224594	0.420796	0.291292	0.168905	0.413951	0.116507	0.25064	0.489843	0.118876	0.307604	0.733414	0.042692	0.382168	0.811917	0.375056	0.0702576	0.440676	-0.129011	0.546782	0.87422
NM_001004727	OR4X2	-0.808926	0.275594	0.414485	0.777743	0.1003	0.307408	-2.23216	0.256616	0.456762	-1.81638	0.949604	0.990773	0.0350924	0.287621	0.52829	0.552653	0.0165399	0.277293	-0.0885277	0.535815	0.883577	-0.236309	0.76663	0.946008	0.159868	0.246175	0.684281
NM_001004728	OR5A1	-1.07558	0.345536	0.465051	0.73649	0.11054	0.323178	-6.98494	0.851922	0.935151	-0.0747471	0.324885	0.596612	2.02089	0.000420094	0.0107682	-0.203878	0.737088	0.945197	-0.152796	0.608183	0.909954	-0.135411	0.655097	0.906302	-0.893334	0.97143	0.999444
NM_001004729	OR5AN1	-0.135299	0.121463	0.350599	-0.557264	0.643798	0.816588	0.804129	0.0181855	0.0846206	0.222654	0.193878	0.447817	-0.415632	0.515092	0.720559	-0.225627	0.760296	0.952364	-0.403439	0.829615	0.974736	-0.0192181	0.500292	0.839897	0.10709	0.295803	0.726945
NM_001004730	OR5AR1	-0.0116189	0.0996446	0.350599	-0.0418626	0.4148	0.649811	-0.328539	0.0640839	0.190212	0.79293	0.0508178	0.204612	-0.469003	0.541539	0.741359	0.53637	0.0191333	0.288948	1.13701	0.000148538	0.043507	0.286643	0.128536	0.53974	0.340342	0.114297	0.52942
NM_001004731	OR5AU1	-0.0557979	0.107117	0.350599	0.741891	0.109137	0.32103	0.831324	0.0174897	0.0824524	0.322073	0.158495	0.399077	0.102786	0.256603	0.496125	0.0305107	0.428384	0.80901	-0.0752797	0.520026	0.877123	-0.173215	0.699541	0.921874	-0.00520787	0.411977	0.805224
NM_001004733	OR5B12	-0.203404	0.13444	0.350599	0.154353	0.323748	0.56885	0.169591	0.0383764	0.137335	-1.51547	0.909333	0.979428	0.377911	0.148033	0.363044	-0.0198958	0.500172	0.847673	-0.0948207	0.542993	0.885528	-0.0379591	0.526262	0.8528	0.0033566	0.402936	0.800453
NM_001004734	OR14I1	-0.162151	0.126463	0.350599	-0.286289	0.528611	0.737169	1.41034	0.00795088	0.0490231	0.6711	0.0701993	0.247948	-0.285266	0.448922	0.671106	-0.172949	0.70178	0.932392	-0.103451	0.552844	0.890805	0.0412878	0.414153	0.7904	-0.413491	0.802293	0.965059
NM_001004735	OR5D14	-0.348435	0.164426	0.350943	0.657509	0.132152	0.354129	-1.90009	0.21294	0.407195	-1.12342	0.816094	0.940398	0.972257	0.0285769	0.138317	0.267859	0.144425	0.581179	0.329151	0.11765	0.582352	0.34051	0.0898443	0.475476	0.0704661	0.332438	0.753889
NM_001004736	OR5K1	0.402319	0.0457867	0.350599	1.21611	0.0295211	0.154694	-0.8435	0.100861	0.253477	0.503222	0.105994	0.315261	2.13924	0.00022799	0.00711899	0.0550031	0.39417	0.793358	0.485994	0.0466329	0.429934	0.463293	0.0350726	0.342788	0.604985	0.0253921	0.299715
NM_001004737	OR5K2	-1.18118	0.373159	0.485515	-0.159243	0.469945	0.693474	-1.87948	0.210321	0.403899	-1.09477	0.807013	0.936062	-1.59124	0.887801	0.94825	0.243557	0.166234	0.608161	0.149718	0.265781	0.743788	0.313786	0.107789	0.504696	0.443983	0.0669589	0.436549
NM_001004738	OR5L1	-0.597266	0.222272	0.377797	0.427111	0.209593	0.452292	-2.48011	0.291527	0.494828	0.269277	0.17663	0.424704	0.333266	0.163256	0.383105	-0.45967	0.923142	0.995131	-0.542518	0.902886	0.988828	-0.641775	0.968472	0.997924	-0.745098	0.94537	0.997236
NM_001004739	OR5L2	-0.974318	0.318891	0.446232	-0.457896	0.603377	0.7891	-1.38231	0.152062	0.329308	-0.521449	0.558516	0.788821	-1.53561	0.879279	0.943828	-0.200933	0.73385	0.944114	0.0298579	0.396898	0.821008	-0.0134277	0.491972	0.83491	-0.556097	0.882863	0.985464
NM_001004740	OR5M1	-0.534673	0.207015	0.3692	0.185441	0.309832	0.556944	-1.43087	0.157313	0.336591	-0.816605	0.700658	0.88035	-0.0766548	0.342087	0.579381	0.365437	0.0764609	0.461073	-0.116011	0.567056	0.896953	0.186521	0.225865	0.653893	-0.0247812	0.433127	0.816783
NM_001004741	OR5M10	-1.19268	0.376154	0.487709	-1.69774	0.910026	0.960583	-1.70158	0.188508	0.377114	-1.08207	0.802813	0.933866	-0.289313	0.451052	0.672859	-0.0782348	0.58188	0.884828	0.422274	0.0693291	0.493499	0.182254	0.230707	0.659381	0.531393	0.0404287	0.362982
NM_001004742	OR5M3	-1.11475	0.355801	0.472925	-0.18819	0.483647	0.704552	-5.52831	0.722864	0.852394	0.115832	0.236924	0.501717	1.14165	0.0162675	0.0988319	0.487955	0.0292901	0.336843	0.248019	0.175365	0.655364	0.0903294	0.346021	0.748599	0.344464	0.111994	0.52449
NM_001004743	OR5M9	-0.480735	0.194216	0.362528	0.658341	0.131934	0.353825	-3.99556	0.520588	0.705547	-0.274234	0.426704	0.689313	1.68851	0.00190414	0.0277891	0.162691	0.253123	0.694339	-0.704362	0.952414	0.996533	-0.553003	0.949267	0.995577	-0.404474	0.796076	0.963642
NM_001004744	OR8U3	0.038277	0.0916568	0.350599	1.26725	0.0249299	0.141594	2.21779	0.00223355	0.0208609	0.376709	0.141093	0.372118	0.098282	0.258583	0.498269	-0.366459	0.875399	0.983996	0.191744	0.224577	0.707865	0.208657	0.201509	0.632108	0.119165	0.284127	0.716813
NM_001004745	OR5T1	-1.07902	0.346444	0.465978	0.785163	0.0985087	0.304096	-3.77654	0.487746	0.676456	-1.14481	0.822782	0.942622	-0.179879	0.394601	0.6268	0.0662862	0.378334	0.783761	-0.846074	0.975112	0.999863	-0.144113	0.665649	0.909865	-0.151495	0.570377	0.884765
NM_001004746	OR5T2	-2.00643	0.572046	0.631832	0.314209	0.254218	0.499352	-7.15848	0.863163	0.94133	-0.969295	0.762921	0.913913	-0.212134	0.411335	0.640017	-0.0593823	0.555958	0.872335	-0.0530207	0.493748	0.864962	0.0413392	0.414103	0.7904	-0.662027	0.923033	0.994503
NM_001004747	OR5T3	0.173696	0.0720852	0.350599	-0.17528	0.47753	0.699734	1.71038	0.00506484	0.0361391	0.756824	0.0558962	0.2162	0.432253	0.130852	0.339681	0.187253	0.224662	0.670368	0.0196706	0.408897	0.826187	0.201512	0.209223	0.639091	0.286347	0.147353	0.577078
NM_001004748	OR51A2	-1.49847	0.453891	0.544382	0.0303722	0.381106	0.620808	-5.31725	0.69853	0.83618	-1.0344	0.78662	0.926178	0.327393	0.165352	0.386095	0.0409948	0.413853	0.802349	-0.121595	0.573443	0.898846	-0.0401103	0.529307	0.854537	-0.167327	0.586745	0.890685
NM_001004749	OR51A7	-1.39408	0.427699	0.525263	1.08092	0.0447136	0.195706	-4.81691	0.636002	0.79135	-1.77764	0.945687	0.98987	-0.0627055	0.335138	0.572874	-0.523643	0.945619	0.997945	-0.621757	0.930944	0.994158	-0.496861	0.931858	0.992131	-1.41441	0.997383	0.999781
NM_001004750	OR51B6	-1.87399	0.5426	0.610255	-0.848682	0.745559	0.877139	-4.74748	0.626774	0.7852	-1.5481	0.914793	0.981029	-0.351701	0.482715	0.696362	0.00474731	0.465036	0.830234	-0.487388	0.878024	0.985082	-0.277229	0.803876	0.956997	-0.0627816	0.474536	0.840239
NM_001004751	OR51D1	-1.1284	0.35937	0.475652	2.70633	5.89e-05	0.00488846	-11.1596	0.975029	0.99188	1.63494	0.00380622	0.0418288	2.30471	0.000113995	0.00500363	-0.0459957	0.537162	0.863045	0.309372	0.130278	0.600747	-0.515486	0.938323	0.994004	-0.170558	0.590083	0.891539
NM_001004752	OR51F1	0.454436	0.0409888	0.350599	1.00472	0.0557144	0.222357	0.506027	0.0262642	0.107023	1.73378	0.00272588	0.0337366	2.15346	0.000219546	0.00708186	0.716565	0.00302897	0.143725	0.428864	0.0666715	0.487152	0.339016	0.0907817	0.476514	0.3333	0.118203	0.537646
NM_001004753	OR51F2	-0.0183422	0.100754	0.350599	-0.0135097	0.401407	0.638887	0.466727	0.0274756	0.110352	2.58746	0.000164763	0.00634637	0.240733	0.19848	0.429639	0.171883	0.24235	0.688174	-0.348181	0.79069	0.965537	-0.283225	0.809065	0.957687	0.386154	0.0910905	0.485956
NM_001004754	OR51I2	-1.61549	0.482542	0.565629	-2.06904	0.94183	0.975554	-3.70841	0.477343	0.668197	-0.239458	0.408709	0.673236	-0.445043	0.529677	0.732557	0.281159	0.133237	0.566393	0.741535	0.0065979	0.208144	0.700382	0.00336013	0.146442	0.934939	0.0022602	0.112183
NM_001004755	OR51L1	-0.760567	0.263083	0.405632	0.871658	0.0796584	0.270583	-1.00846	0.115143	0.275661	0.95972	0.0320119	0.153843	0.209759	0.210919	0.4447	-0.718233	0.982342	0.999859	-0.533597	0.899327	0.988398	-0.847352	0.9899	0.999918	-0.943086	0.977207	0.999781
NM_001004756	OR51M1	-0.276708	0.149172	0.350599	-0.0867352	0.435976	0.668552	-1.08946	0.122706	0.287485	0.420318	0.127877	0.351953	-0.350951	0.482356	0.696095	0.321386	0.103045	0.515644	0.135832	0.280117	0.752657	0.618737	0.00813938	0.205433	-0.0419766	0.451723	0.827474
NM_001004757	OR51Q1	-1.67517	0.496727	0.576142	0.821803	0.0902093	0.289875	-8.65632	0.932088	0.977147	0.272302	0.175524	0.423215	0.86155	0.040671	0.170492	-0.208387	0.742002	0.946109	-0.59014	0.920755	0.991672	0.0984625	0.33512	0.740635	-0.341538	0.748791	0.950242
NM_001004758	OR51S1	0.186633	0.0704181	0.350599	2.7881	4.41e-05	0.00422923	0.9492	0.0149937	0.0745068	0.720962	0.0616087	0.229602	1.13313	0.0167109	0.10023	0.169954	0.244534	0.688666	0.00681919	0.423791	0.833234	0.317672	0.105166	0.501192	0.252085	0.171049	0.60942
NM_001004759	OR51T1	-0.269007	0.147612	0.350599	0.655468	0.132707	0.354658	2.30537	0.00195977	0.0193249	0.201809	0.20187	0.458198	-0.20094	0.405587	0.636161	-0.155535	0.681314	0.924459	-0.613712	0.928557	0.993027	-0.416422	0.897765	0.983819	0.109639	0.293388	0.724765
NM_001004760	OR51V1	0.289767	0.0576476	0.350599	1.87314	0.00243434	0.0362139	-1.63458	0.180532	0.367312	1.02006	0.0267166	0.13779	2.27841	0.000141439	0.0058202	0.257453	0.153594	0.593695	-0.0969135	0.545309	0.886761	0.30361	0.115379	0.518139	0.694919	0.0138683	0.237461
NM_001005	RPS3	-0.891916	0.297203	0.430689	-0.277282	0.524564	0.734186	-2.76625	0.333255	0.537224	-0.115698	0.345073	0.616073	-0.408436	0.51149	0.717831	0.47568	0.0325499	0.347659	0.850389	0.00263354	0.152162	0.875121	0.000433565	0.065518	0.971994	0.00168411	0.0998888
NM_001005160	OR52A5	-0.976966	0.319564	0.446776	-0.533476	0.634629	0.81055	-2.62633	0.312681	0.516955	-0.45089	0.52143	0.763291	-0.297169	0.455141	0.676076	0.20984	0.199784	0.644188	0.392914	0.0825369	0.519852	0.13223	0.290894	0.705119	-0.105677	0.52153	0.862778
NM_001005161	OR52B4	-2.4314	0.658604	0.700747	0.240295	0.285703	0.53336	-9.20216	0.946377	0.983274	-0.503984	0.549431	0.783103	-0.259737	0.435939	0.66108	0.611932	0.00919531	0.223568	0.459675	0.0551718	0.454893	0.345853	0.0866588	0.469831	0.905641	0.00286038	0.120752
NM_001005162	OR52B6	0.200609	0.0685614	0.350599	0.947352	0.0649745	0.241996	-0.458083	0.0723588	0.204998	1.21628	0.0144803	0.0949712	1.28585	0.00963893	0.0730335	0.291324	0.12524	0.551998	0.0946022	0.324048	0.781503	0.16914	0.245552	0.669663	0.247369	0.174561	0.613187
NM_001005163	OR52D1	-0.526923	0.20518	0.368282	0.153647	0.32407	0.569099	-2.98943	0.366991	0.569833	0.310887	0.162197	0.403717	0.417209	0.135595	0.346837	0.296518	0.121237	0.546415	0.704235	0.00913107	0.236199	0.532446	0.0189745	0.274494	0.180787	0.22774	0.670719
NM_001005164	OR52E2	-1.01033	0.328399	0.453097	0.38875	0.224041	0.467733	-3.62266	0.464311	0.65763	-0.549469	0.572796	0.799542	-0.25793	0.435033	0.660315	0.447543	0.0410467	0.375874	0.510993	0.0395171	0.406215	0.405499	0.0560804	0.409959	0.473804	0.0568081	0.412711
NM_001005165	OR52E4	-0.260883	0.145931	0.350599	0.316287	0.253362	0.49823	-3.3474	0.422166	0.620434	0.120031	0.235141	0.499812	1.86755	0.000840187	0.016662	-0.289383	0.819265	0.97066	-0.00461107	0.436937	0.839786	-0.0355032	0.522737	0.85038	-0.255261	0.673917	0.924361
NM_001005167	OR52E6	-1.75298	0.515044	0.589038	-1.10119	0.81289	0.912982	-5.1943	0.683781	0.825423	-1.17581	0.831884	0.946503	0.459385	0.122762	0.32751	0.545306	0.0176319	0.281985	0.341711	0.109972	0.569795	0.591336	0.0107026	0.226714	0.64668	0.0194144	0.270972
NM_001005168	OR52E8	-0.155697	0.125254	0.350599	0.496259	0.184253	0.421827	-1.81724	0.202537	0.3944	0.262042	0.179268	0.428101	0.436156	0.129739	0.33835	0.403401	0.0575705	0.420663	0.333428	0.115049	0.57829	0.427983	0.0470498	0.382673	0.257886	0.166875	0.602799
NM_001005169	OR52I1	-0.168161	0.127631	0.350599	0.187281	0.308917	0.555848	-0.0466695	0.0482164	0.158272	-1.22975	0.84704	0.953316	0.416495	0.135825	0.347272	0.0116123	0.455293	0.824758	0.211291	0.206948	0.690553	0.060415	0.387284	0.773823	0.0325233	0.372242	0.783069
NM_001005170	OR52I2	0.117201	0.0798401	0.350599	0.56619	0.160492	0.392567	-1.55951	0.171826	0.356378	1.03436	0.02563	0.13442	1.34432	0.00762713	0.0636064	0.0123357	0.454223	0.824758	0.0138392	0.415824	0.829982	0.0879245	0.349277	0.749089	0.354705	0.106818	0.514986
NM_001005171	OR52K1	-1.10723	0.353837	0.471425	0.0203358	0.385672	0.624538	-3.57792	0.457332	0.651339	-0.771221	0.680354	0.868476	-0.100132	0.353909	0.59064	-0.0761062	0.579031	0.883704	0.268184	0.159486	0.63913	0.284069	0.130696	0.54326	0.00914844	0.396697	0.797391
NM_001005172	OR52K2	-0.206549	0.135059	0.350599	0.723892	0.113796	0.327759	1.48527	0.00708393	0.04497	0.856584	0.0427653	0.183978	0.734161	0.0597082	0.214281	-0.475455	0.929495	0.995721	-0.199248	0.657592	0.928099	-0.12765	0.645454	0.901863	-0.023844	0.432076	0.816368
NM_001005173	OR52L1	0.413029	0.0447658	0.350599	1.16252	0.0349573	0.170942	0.915941	0.0157215	0.0768616	0.397407	0.134682	0.362466	0.893786	0.0368458	0.161152	0.504847	0.0251752	0.319457	0.362525	0.0981053	0.549858	0.623795	0.00769779	0.200867	0.160948	0.245192	0.684281
NM_001005174	OR52N2	0.206918	0.0677506	0.350599	0.566588	0.160334	0.392389	4.9239	6.84e-06	0.000442243	0.608811	0.0821247	0.271733	0.420784	0.134329	0.344937	0.39621	0.0608203	0.428941	-0.161709	0.61797	0.913285	0.150476	0.267987	0.68899	0.442692	0.0674728	0.437375
NM_001005175	OR52N4	-0.212677	0.136255	0.350599	-0.106275	0.445124	0.675426	-0.0870491	0.0503518	0.162577	0.238544	0.18779	0.439623	-0.89593	0.721888	0.857262	0.06322	0.382568	0.785973	0.424646	0.0683275	0.491902	0.471891	0.0324793	0.333415	0.17515	0.23269	0.674145
NM_001005177	OR52R1	-0.300846	0.154172	0.350599	-0.032912	0.410587	0.646704	-2.6516	0.316203	0.520314	-0.00790863	0.292946	0.564672	1.48903	0.0042896	0.044952	0.219822	0.1894	0.6312	-0.439587	0.852006	0.979917	-0.182045	0.709748	0.925882	-0.306107	0.719171	0.938169
NM_001005178	OR52W1	-1.00597	0.327251	0.452094	1.6875	0.00538371	0.0579483	-5.46875	0.716216	0.847588	-0.741965	0.666844	0.859377	0.499342	0.111464	0.309878	-0.265258	0.798362	0.963827	-0.723395	0.956129	0.99709	-0.395741	0.886777	0.981017	-0.0641831	0.476031	0.840956
NM_001005179	OR56A4	-0.141344	0.12258	0.350599	1.25537	0.0259284	0.144041	-2.68257	0.320746	0.524675	1.05344	0.0240908	0.128832	0.010969	0.298955	0.539671	-0.0321186	0.517555	0.85496	-0.345231	0.788466	0.964892	0.119479	0.307285	0.716988	-0.307505	0.720325	0.938596
NM_001005180	OR56B1	-0.510411	0.201204	0.366179	-0.14665	0.463979	0.688824	-2.37381	0.276396	0.477976	0.705565	0.0642094	0.235026	-0.226754	0.418886	0.646833	0.431023	0.0467232	0.389491	0.275542	0.154058	0.636207	0.444078	0.0412248	0.365084	-0.354886	0.759299	0.954186
NM_001005181	OR56B4	0.240161	0.0635726	0.350599	2.16847	0.00066219	0.0171397	-0.937608	0.10878	0.265838	0.897999	0.0381811	0.172283	-0.404342	0.509394	0.716285	0.142672	0.277208	0.710848	0.64176	0.015193	0.292863	0.172639	0.241546	0.666513	0.00357374	0.402701	0.800442
NM_001005182	OR6C1	-1.18221	0.373419	0.485624	-0.422405	0.588326	0.779399	-2.80004	0.338397	0.542624	-0.142169	0.358542	0.628981	-1.36422	0.849267	0.928612	-0.485994	0.933361	0.995982	0.0754671	0.345142	0.792415	-0.107569	0.620091	0.893727	-0.342727	0.749734	0.950821
NM_001005183	OR6C76	-1.83971	0.534878	0.604019	0.599414	0.149663	0.378502	-9.80935	0.95827	0.987257	-0.34139	0.462618	0.717888	2.19247	0.000198436	0.00697067	-0.093187	0.602012	0.893957	0.140128	0.275608	0.749949	-0.0481332	0.540182	0.858362	-0.129376	0.547155	0.874571
NM_001005184	OR6K6	-0.892178	0.297274	0.430763	-0.0591289	0.422898	0.656717	-4.41292	0.580958	0.751639	-0.226033	0.401691	0.667356	1.12937	0.016941	0.100823	0.517045	0.0225597	0.307603	0.133306	0.282596	0.754595	0.0585	0.389902	0.77506	0.0397624	0.364306	0.776948
NM_001005185	OR6N1	-2.65556	0.699553	0.734258	-0.635929	0.67394	0.834753	-10.3908	0.966533	0.989664	-0.31516	0.448663	0.707728	0.719584	0.0623322	0.220169	0.220201	0.188989	0.630569	0.0556044	0.367836	0.806629	-0.13403	0.653322	0.905114	-0.31407	0.726098	0.941503
NM_001005186	OR6Q1	-0.16241	0.126515	0.350599	1.99591	0.00146313	0.0268527	-0.690259	0.0886484	0.232765	0.414995	0.129395	0.354407	1.5819	0.00290688	0.0351704	-0.0205812	0.501137	0.847994	-0.295552	0.748222	0.954899	0.0689147	0.375514	0.766167	-0.402423	0.794691	0.963564
NM_001005187	OR6T1	-0.430632	0.182672	0.356724	1.3598	0.0182008	0.116898	-3.23872	0.405363	0.604801	1.2783	0.0119651	0.0853715	-1.1219	0.792725	0.896645	0.479403	0.0315262	0.346277	0.375183	0.091397	0.538464	0.260166	0.150921	0.574366	0.520992	0.04301	0.370655
NM_001005188	OR6X1	-0.45513	0.188186	0.359385	1.84656	0.00276438	0.039349	-0.554772	0.0787993	0.215936	-0.221183	0.399174	0.665367	0.325371	0.166085	0.387017	-0.472763	0.928435	0.995721	-0.356076	0.796509	0.966661	-0.608552	0.962312	0.996692	-0.383127	0.780993	0.959071
NM_001005189	OR6Y1	-0.45487	0.188128	0.359384	1.00165	0.0561853	0.223733	-2.2732	0.262217	0.462928	-0.269939	0.424495	0.687374	-0.277996	0.445189	0.668391	0.720306	0.00288846	0.141588	1.40589	8.03e-06	0.0100258	0.372306	0.0716908	0.442818	0.474839	0.0564468	0.411955
NM_001005190	OR7A10	-2.41415	0.655292	0.698203	0.440401	0.204666	0.445882	-12.807	0.98847	0.997382	0.746374	0.0575084	0.219254	1.96363	0.000548866	0.0127758	-0.29159	0.821126	0.97105	-0.465553	0.866593	0.98282	0.0489785	0.40335	0.783741	-0.603241	0.902368	0.989646
NM_001005191	OR7D4	-0.271039	0.148025	0.350599	-1.05105	0.800929	0.906774	-0.370046	0.0667213	0.194718	-0.0656978	0.320451	0.591796	0.402633	0.140106	0.352623	-0.172711	0.701501	0.932343	-0.0893954	0.536871	0.883776	0.0014875	0.470673	0.822585	-0.341283	0.748584	0.950168
NM_001005192	OR7G1	-0.799354	0.273096	0.41276	-0.446879	0.598725	0.786326	-3.72592	0.480053	0.670218	0.669044	0.0705809	0.248577	0.306335	0.17303	0.396845	0.315176	0.107407	0.523036	0.154182	0.261158	0.739575	0.320035	0.103542	0.497844	0.646781	0.0193944	0.270972
NM_001005193	OR7G2	-0.367805	0.168675	0.35145	1.21849	0.0293319	0.154353	-2.92038	0.356697	0.560075	-0.0983809	0.336481	0.608652	0.32905	0.164767	0.385316	-0.0499618	0.542627	0.865701	-0.0840606	0.530317	0.881261	0.0698236	0.374215	0.765321	-0.00523203	0.412013	0.805224
NM_001005194	OR8A1	-0.627319	0.22961	0.38156	0.314469	0.254105	0.49929	-2.93689	0.359207	0.562402	-0.683798	0.639548	0.843323	0.796941	0.0497526	0.192786	0.471967	0.0335977	0.351948	0.230577	0.189912	0.671833	0.26338	0.148111	0.571061	0.262805	0.163302	0.596697
NM_001005195	OR8B12	0.0881588	0.0840576	0.350599	0.737887	0.110188	0.322601	-2.30787	0.266967	0.468412	0.626787	0.0784332	0.264309	1.34215	0.00769046	0.0638167	0.388929	0.0643029	0.437668	-0.128625	0.581426	0.90106	0.010442	0.457773	0.8144	0.0818887	0.32094	0.746009
NM_001005196	OR8B4	-0.16716	0.127438	0.350599	0.902014	0.073583	0.259808	4.13958	5.93e-05	0.00202598	0.21374	0.1973	0.452162	2.09791	0.000278655	0.00815925	0.108023	0.321753	0.745323	-0.0853007	0.53184	0.881304	-0.342766	0.854234	0.971604	-0.348597	0.754283	0.952296
NM_001005197	OR8D4	0.298627	0.0566522	0.350599	2.59655	9.88e-05	0.00667007	5.77214	2.28e-06	0.000329514	2.23253	0.000533914	0.013032	0.324615	0.166365	0.38748	0.766644	0.00171019	0.114942	-0.217821	0.676645	0.932518	0.56073	0.0145525	0.250489	0.0849542	0.317891	0.744082
NM_001005198	OR8G5	-2.68849	0.705413	0.738785	0.0562868	0.369189	0.610782	-5.8996	0.761665	0.878175	-2.04923	0.96867	0.995345	-2.86143	0.972833	0.98761	0.456088	0.0382064	0.366241	0.0674668	0.354317	0.797365	0.299546	0.118363	0.523167	-0.120286	0.537303	0.868704
NM_001005199	OR8H1	-0.162419	0.126517	0.350599	0.67935	0.125827	0.345683	-1.50096	0.165203	0.346888	1.1456	0.0181218	0.109069	-0.973656	0.748516	0.873534	0.290446	0.125928	0.553438	0.0902754	0.328869	0.782786	-0.28184	0.807915	0.957687	-0.35109	0.756258	0.953096
NM_001005200	OR8H2	-0.270419	0.147898	0.350599	1.55616	0.00889227	0.0772295	2.13963	0.00252329	0.0226022	0.596074	0.0847505	0.277178	0.4758	0.118048	0.320187	-0.229197	0.763887	0.953746	-0.231359	0.68978	0.936529	-0.406789	0.892586	0.982172	-0.214333	0.634538	0.909832
NM_001005201	OR8H3	0.581702	0.0309214	0.350599	2.16524	0.000670599	0.017165	-0.202546	0.0565437	0.17454	0.0119528	0.283346	0.554355	0.614733	0.0829738	0.259296	0.128331	0.29537	0.724818	0.587804	0.0229371	0.34207	0.811087	0.000949427	0.0934654	0.799585	0.00648352	0.170209
NM_001005202	OR8K3	-0.852617	0.286891	0.4228	0.343565	0.242032	0.486766	-3.72346	0.479738	0.670139	0.275851	0.174273	0.42151	-0.306429	0.459629	0.67943	-0.255495	0.789387	0.96201	0.126391	0.289952	0.760283	0.13727	0.284455	0.701637	0.0589984	0.344098	0.761685
NM_001005203	OR8S1	-0.101113	0.115184	0.350599	0.022052	0.38488	0.624068	-0.34373	0.0650444	0.191647	0.21341	0.197417	0.452221	-0.296186	0.454636	0.675825	0.481117	0.0310404	0.345096	0.0845683	0.335142	0.78706	0.608317	0.00901254	0.213045	0.828228	0.00519685	0.15607
NM_001005204	OR8U1	0.0341497	0.0923122	0.350599	0.128146	0.335802	0.580546	0.53061	0.0255523	0.105228	0.250834	0.183329	0.433822	0.569124	0.093607	0.280577	0.239183	0.170321	0.611349	-0.0611206	0.503309	0.868442	0.128636	0.295463	0.708676	-0.1701	0.589611	0.891539
NM_001005205	OR8J1	-2.22799	0.618363	0.668545	0.23372	0.288511	0.536392	-8.81694	0.936671	0.979503	-0.832247	0.707688	0.883851	0.503502	0.110417	0.308381	0.0479777	0.404041	0.798757	-0.314917	0.764385	0.959068	-0.240933	0.77111	0.947768	-0.42864	0.812574	0.968229
NM_001005207	TRIM37	-0.264789	0.146728	0.350599	1.70065	0.00511884	0.0565202	-3.41286	0.432236	0.6298	0.566462	0.0908446	0.287427	0.0865882	0.263878	0.503795	0.576014	0.013242	0.259317	-0.160301	0.616469	0.913065	0.36319	0.0765102	0.453121	-0.0840194	0.4978	0.85189
NM_001005209	TMEM198	0.022124	0.0942224	0.350599	0.633735	0.139169	0.363606	-1.28591	0.141736	0.314781	0.868318	0.0414367	0.18054	-0.127649	0.368152	0.603254	0.401098	0.0586163	0.424244	0.534305	0.0336298	0.387137	0.065154	0.380572	0.769414	-0.811411	0.958989	0.998346
NM_001005210	LRRC55	-0.202816	0.134323	0.350599	1.32842	0.020263	0.1248	-0.189178	0.055768	0.17288	0.282844	0.171958	0.418532	-0.138361	0.373693	0.608192	-0.0615508	0.558906	0.874371	0.0594991	0.363248	0.802675	-0.475851	0.924026	0.990445	-0.33336	0.742144	0.947253
NM_001005211	OR9I1	0.280825	0.0587273	0.350599	1.76359	0.00392269	0.0481228	-3.15087	0.391811	0.592016	0.443254	0.121655	0.341228	2.06732	0.000346208	0.0096005	0.292442	0.124346	0.550909	0.223641	0.196004	0.67918	0.571094	0.0131354	0.24218	0.451132	0.0643274	0.430027
NM_001005212	OR9Q1	-1.14475	0.363694	0.479005	0.712155	0.116848	0.332036	-4.87313	0.643483	0.796621	-0.381216	0.483828	0.733269	-0.0368133	0.322062	0.561347	0.282396	0.132297	0.564828	-0.127082	0.5797	0.90073	0.00616375	0.463877	0.818022	0.189146	0.220506	0.663722
NM_001005214	LRRC52	0.24322	0.0632133	0.350599	1.24176	0.0271162	0.147795	0.953779	0.0148956	0.0742477	2.21842	0.000552684	0.0131938	0.250039	0.194921	0.424914	0.276404	0.137135	0.571846	-0.0827984	0.528797	0.88071	0.339234	0.0906593	0.476314	0.440039	0.0685065	0.441303
NM_001005216	OR2J3	-0.0759006	0.110673	0.350599	0.0228477	0.384537	0.623951	0.64728	0.0221621	0.0962833	-0.902624	0.737037	0.899852	-0.028389	0.317793	0.557324	0.0441251	0.409403	0.800551	-0.036349	0.47433	0.855543	-0.0770498	0.579496	0.877304	-0.234329	0.65437	0.916987
NM_001005218	OR5B21	-0.39648	0.174929	0.353016	-0.0445031	0.416049	0.650751	-1.44948	0.159431	0.33951	-0.319124	0.450682	0.709224	0.227189	0.203874	0.436259	-0.0507844	0.543788	0.866673	0.180195	0.235481	0.715932	-0.0244698	0.507715	0.843936	-0.0731197	0.485686	0.845735
NM_001005221	OR4F29	0.122541	0.0791009	0.350599	0.671056	0.128265	0.348809	1.19928	0.0107274	0.0594077	-0.141441	0.358173	0.628714	-0.127133	0.367911	0.603188	-0.0840775	0.589666	0.888405	-0.0600548	0.502107	0.868108	0.218027	0.191656	0.623756	0.416269	0.0778464	0.459463
NM_001005226	OR2B3	-1.58086	0.474112	0.559349	-1.24433	0.842998	0.929686	-5.63187	0.734073	0.860012	1.80621	0.0021586	0.0297407	-1.25346	0.825564	0.915422	-0.121202	0.63889	0.909487	0.0386985	0.386729	0.814885	-0.480212	0.925682	0.990966	-0.18382	0.603666	0.896206
NM_001005234	OR1L3	-0.985195	0.321718	0.447879	0.235546	0.287807	0.535791	-5.43776	0.712748	0.84559	-0.388219	0.487601	0.736627	1.64965	0.0022208	0.0300505	-0.0115061	0.487967	0.840107	0.295753	0.139505	0.61354	0.00512347	0.465374	0.818814	0.456687	0.0624486	0.424431
NM_001005235	OR1L4	-0.139445	0.122235	0.350599	1.54657	0.00920129	0.0784488	0.585811	0.0239279	0.101034	2.00838	0.00109285	0.0196595	1.42367	0.00556466	0.0523778	-0.0335965	0.519604	0.855409	0.323902	0.120942	0.587065	-0.223783	0.754205	0.942146	-0.624303	0.910104	0.991305
NM_001005236	OR1L1	-0.132207	0.120883	0.350599	-0.23101	0.503513	0.719687	-1.4404	0.158356	0.338159	0.884607	0.0396452	0.175773	0.257971	0.191808	0.420793	0.151595	0.266331	0.702858	0.327506	0.11863	0.583933	0.0251126	0.436967	0.802652	0.110246	0.292794	0.724277
NM_001005237	OR51G1	-0.951315	0.312902	0.442472	-0.250905	0.512645	0.726265	-2.47346	0.290651	0.49372	-1.446	0.896569	0.974575	0.365103	0.152376	0.368839	-0.114919	0.630787	0.906555	0.0128305	0.416946	0.830409	-0.282939	0.808844	0.957687	0.636473	0.0205767	0.276747
NM_001005238	OR51G2	0.1923	0.0696692	0.350599	1.49943	0.0109398	0.0862631	1.54009	0.00649531	0.0423778	1.00746	0.0277635	0.140748	0.24633	0.196405	0.426766	0.0912537	0.344251	0.761893	0.290129	0.14354	0.620775	0.0354249	0.422565	0.795064	0.352392	0.108018	0.517715
NM_001005239	OR11H1	0.00193044	0.0974194	0.350599	0.185299	0.309909	0.55699	0.102847	0.0413104	0.144032	-0.170852	0.373202	0.643214	0.562641	0.095205	0.283377	0.0837948	0.354269	0.769036	-0.21093	0.669684	0.930652	-0.0574052	0.552814	0.865303	0.192262	0.217826	0.662406
NM_001005240	OR4F17	-0.211783	0.136081	0.350599	1.38189	0.0169479	0.112732	0.336821	0.0319861	0.121846	1.00466	0.0279345	0.141193	0.729477	0.0605315	0.215893	-0.10543	0.61856	0.901268	-0.410588	0.83422	0.97596	-0.0426742	0.53288	0.855544	-0.28844	0.704044	0.932782
NM_001005241	OR4N4	0.252395	0.0620832	0.350599	0.797803	0.0954773	0.298218	-0.786046	0.0960973	0.245498	0.624067	0.0790234	0.265603	1.99066	0.000487646	0.0118039	0.0907109	0.344988	0.762159	0.481711	0.0479738	0.433922	0.357347	0.0798643	0.459726	0.0798093	0.323054	0.746747
NM_001005243	OR9K2	-2.16906	0.606299	0.658814	0.612353	0.145722	0.372996	-8.26701	0.918442	0.969889	-0.0426328	0.30937	0.581773	-0.978971	0.750146	0.874678	0.19978	0.210615	0.654893	0.515643	0.0382686	0.40342	0.0915544	0.344329	0.747548	-0.0789947	0.492246	0.849322
NM_001005245	OR5M11	-0.958179	0.314734	0.443645	0.239149	0.286192	0.533948	-3.2137	0.401548	0.601424	-0.382705	0.484652	0.734037	-0.475458	0.544652	0.743057	0.222557	0.186622	0.629382	0.0039229	0.427121	0.835529	-0.0188122	0.499758	0.839579	0.0819788	0.320848	0.746009
NM_001005270	OR4C12	0.123614	0.0789421	0.350599	0.829872	0.0884749	0.287018	1.24195	0.0101502	0.0575274	0.699282	0.0653377	0.237425	0.0149579	0.297069	0.537759	0.106525	0.323636	0.746527	0.200781	0.216338	0.699712	0.208962	0.201162	0.631777	-0.0218139	0.429948	0.815193
NM_001005271	CHD3	-0.253525	0.144463	0.350599	1.0924	0.0431643	0.192696	-2.47095	0.290343	0.493387	0.136679	0.228196	0.49105	1.01345	0.0250135	0.127325	-0.308085	0.834252	0.974007	-0.0130665	0.446806	0.843792	-0.448436	0.912653	0.98734	-0.244512	0.66422	0.920672
NM_001005272	OR4A5	0.0971695	0.082716	0.350599	1.0598	0.0474696	0.202285	3.55972	0.000175672	0.0038976	1.08515	0.0220219	0.122134	0.381778	0.146847	0.361425	-0.0660836	0.565	0.877607	0.318094	0.124543	0.593092	0.146788	0.272534	0.692277	-0.0101196	0.417316	0.807874
NM_001005274	OR4A16	-1.98609	0.56756	0.628677	0.5131	0.178413	0.415368	-7.01321	0.853859	0.93608	-0.926548	0.746216	0.9053	-0.517706	0.565134	0.756751	-0.0378737	0.525492	0.858021	-0.0704731	0.514514	0.874481	0.523952	0.020506	0.282885	-0.261551	0.679696	0.925708
NM_001005275	OR4A15	0.0527568	0.0894008	0.350599	1.29027	0.0230758	0.134743	-1.12682	0.126181	0.292555	-0.0351303	0.305691	0.57771	1.74499	0.00146927	0.0235288	0.136618	0.284826	0.717127	0.11132	0.305998	0.769404	-0.0725185	0.573468	0.874643	0.0356071	0.368854	0.78009
NM_001005276	OR2AE1	-1.05657	0.340526	0.461686	0.0946122	0.351299	0.594324	-5.43448	0.712338	0.845492	1.02748	0.0261701	0.136061	0.0860942	0.264116	0.504032	0.215803	0.193583	0.63646	0.0105117	0.419594	0.831165	0.408375	0.054856	0.407566	0.095344	0.307419	0.737244
NM_001005278	OR6N2	-1.34146	0.4143	0.515428	0.0987904	0.349344	0.592733	-5.57413	0.727998	0.856039	0.167347	0.215578	0.475897	-0.0578483	0.332621	0.570629	0.157935	0.258805	0.698155	-0.313919	0.763576	0.958933	0.280029	0.134008	0.54714	-0.23981	0.659695	0.919426
NM_001005279	OR6K2	-0.00037318	0.0977919	0.350599	0.775535	0.100844	0.308209	0.409918	0.0294491	0.115863	0.917619	0.0360872	0.165832	0.703186	0.0651968	0.225576	0.00595971	0.463276	0.829248	0.0149355	0.414584	0.829132	0.0546127	0.395317	0.778784	-0.0770006	0.49005	0.848514
NM_001005280	OR10A7	-1.74265	0.512626	0.587301	-2.80127	0.972758	0.989995	-2.57828	0.306005	0.510443	-0.800217	0.693373	0.87606	-0.790849	0.683672	0.835592	-0.0303038	0.51507	0.854014	0.0395886	0.385699	0.814423	0.258334	0.152581	0.577073	0.00632793	0.399578	0.79865
NM_001005281	OR6B1	-0.731399	0.255653	0.400672	0.338943	0.243858	0.488351	-1.61844	0.17859	0.364707	-1.80999	0.948999	0.990773	0.163893	0.229831	0.468237	0.235557	0.173771	0.61677	0.344753	0.108266	0.568601	0.467736	0.0337498	0.338855	-0.151613	0.570464	0.884765
NM_001005282	OR5M8	-0.993353	0.323868	0.449444	-0.46007	0.604239	0.789646	-0.542006	0.0778343	0.214361	-1.89502	0.956984	0.991724	-1.07632	0.779905	0.88987	0.186392	0.225627	0.671667	-0.286101	0.739976	0.953702	0.440283	0.0425637	0.370395	-0.0862157	0.500237	0.852962
NM_001005283	OR9Q2	-0.253776	0.144514	0.350599	1.49851	0.010984	0.086434	-2.52114	0.297614	0.501355	0.143867	0.225191	0.48824	0.091297	0.261742	0.501481	0.0389741	0.416609	0.803824	0.125339	0.29111	0.761011	-0.202565	0.732123	0.933525	-0.976852	0.980473	0.999781
NM_001005284	OR9G4	0.186329	0.0704505	0.350599	1.13084	0.0383944	0.1807	-0.401609	0.0686765	0.198174	-0.0434288	0.309718	0.581773	1.43991	0.00523323	0.0504691	0.532842	0.0196973	0.292436	0.0555339	0.367915	0.806647	0.275577	0.137643	0.554239	-0.118636	0.535535	0.868201
NM_001005285	OR2AT4	-0.689166	0.245088	0.392763	0.0664993	0.36448	0.606233	-1.88889	0.211535	0.40542	-1.03868	0.788163	0.926705	0.104408	0.255845	0.49552	-0.216069	0.750454	0.949638	-0.153908	0.609375	0.910704	0.227629	0.181818	0.61362	0.0626413	0.340305	0.758578
NM_001005286	OR6F1	-0.24062	0.141843	0.350599	0.294502	0.262551	0.508606	-0.897213	0.105271	0.260344	0.413159	0.129906	0.355135	1.97553	0.000529867	0.0125603	-0.271348	0.803888	0.966352	-0.118442	0.569776	0.897963	-0.362747	0.867488	0.976116	-0.209943	0.630148	0.908632
NM_001005287	OR2A1	0.045399	0.0905424	0.350599	0.0326355	0.38007	0.6199	1.29805	0.00940646	0.0547298	0.576029	0.0888195	0.284409	1.33679	0.00783823	0.0645838	-0.218495	0.752921	0.950575	0.396543	0.0807866	0.516115	0.182355	0.230611	0.659294	-0.178807	0.598481	0.894545
NM_001005288	OR51I1	-0.11883	0.118423	0.350599	-0.662969	0.683788	0.840478	3.32766	0.000287464	0.00544334	-0.455146	0.523722	0.764932	-0.542193	0.576687	0.764392	-0.444355	0.916929	0.994502	0.169808	0.245654	0.725369	-0.0842649	0.589217	0.880941	-0.116509	0.5332	0.867411
NM_001005289	OR52H1	-0.922019	0.305162	0.436406	-1.11933	0.817147	0.915865	-1.92078	0.215602	0.410228	-0.697115	0.64594	0.847703	0.0491441	0.281171	0.52157	0.23311	0.176206	0.619015	0.0620347	0.360435	0.801512	0.11893	0.307928	0.717711	-0.0766392	0.489628	0.848224
NM_001005323	OR5AK2	0.0413367	0.0911733	0.350599	1.0526	0.0484976	0.205339	1.75459	0.00472034	0.0345169	0.748757	0.0571225	0.218394	1.45748	0.00482791	0.0478719	0.131702	0.290984	0.722284	0.379713	0.0890004	0.533485	0.000714609	0.471769	0.823176	-0.346782	0.752896	0.951583
NM_001005324	OR10V1	-0.259121	0.145594	0.350599	1.59555	0.00772135	0.0712797	-1.56068	0.171965	0.35649	0.0653906	0.258748	0.527042	-1.13675	0.796717	0.89958	0.281274	0.133148	0.566314	-0.176768	0.634139	0.918625	-0.139896	0.660482	0.908009	0.276122	0.154007	0.583237
NM_001005325	OR6M1	-1.10911	0.354318	0.471808	-0.60135	0.660908	0.826556	0.220168	0.0363938	0.13264	-2.44839	0.986097	0.999461	-1.60687	0.890064	0.949523	-0.102062	0.614022	0.89839	0.498737	0.0428974	0.417243	0.655875	0.00555004	0.177939	0.0909626	0.311799	0.74041
NM_001005326	OR4F6	0.0964483	0.0828309	0.350599	1.05095	0.0487141	0.205803	2.3159	0.00195065	0.0193249	1.5565	0.00489491	0.0492421	0.523463	0.105325	0.301019	0.26379	0.147974	0.588027	0.0739642	0.346886	0.793077	0.000952707	0.471438	0.822999	0.0470869	0.356531	0.771723
NM_001005327	OR6K3	-0.281978	0.150273	0.350599	-0.341363	0.553158	0.754806	0.086052	0.0420496	0.145599	-0.465053	0.528917	0.768069	-0.407548	0.511036	0.717456	-0.0975117	0.607842	0.896998	0.00397862	0.427035	0.835529	-0.266747	0.794813	0.953763	-0.126713	0.544271	0.872376
NM_001005328	OR2A7	-0.202006	0.134151	0.350599	1.28741	0.0233007	0.135635	1.03459	0.0134081	0.0690821	-0.742698	0.667198	0.859643	0.424278	0.13329	0.343495	0.115532	0.311996	0.737115	-0.144389	0.598994	0.908303	-0.365965	0.869419	0.97649	-0.413203	0.802106	0.965059
NM_001005329	OR51A4	-0.881189	0.294376	0.428883	-0.883485	0.756001	0.882163	-2.96578	0.363452	0.566833	2.7	0.000114708	0.00496241	-2.37549	0.955384	0.979801	-0.0972214	0.607434	0.896732	-0.326185	0.773761	0.960822	0.115283	0.31254	0.720496	0.547918	0.0366389	0.349751
NM_001005332	MAGED1	-0.143368	0.122956	0.350599	1.01816	0.0535617	0.217029	-1.24074	0.137232	0.3085	0.193434	0.205111	0.461847	-0.544324	0.577698	0.765149	0.669577	0.0051346	0.179619	0.328012	0.118329	0.583284	0.342542	0.0885858	0.473462	-0.0677818	0.479877	0.842906
NM_001005335	HNRNPL	-2.74748	0.715503	0.747001	0.352006	0.238378	0.483665	-8.77672	0.935524	0.979077	-0.120342	0.347447	0.617958	-2.44488	0.95859	0.981026	-0.836963	0.991555	0.999859	-0.419531	0.840061	0.977472	-0.194014	0.722851	0.930331	-0.263873	0.681757	0.926492
NM_001005338	OR5H1	0.0131618	0.0956364	0.350599	0.0471678	0.37325	0.613939	0.637235	0.022445	0.0970625	-0.358218	0.471592	0.725295	0.872376	0.0392861	0.16734	0.147655	0.2711	0.707144	-0.114001	0.564739	0.895859	0.0649276	0.380901	0.76962	-0.0459342	0.455994	0.830207
NM_001005339	RGS10	-0.282243	0.150332	0.350599	1.61154	0.00726307	0.0689714	-5.19416	0.683749	0.825423	0.934672	0.0344312	0.161112	2.54779	2.74e-05	0.00181725	-0.426111	0.908513	0.993387	-0.12515	0.577554	0.900262	-0.240107	0.770277	0.947644	-0.337604	0.745583	0.948826
NM_001005353	AK4	0.00409025	0.0970943	0.350599	0.0545379	0.369977	0.611106	0.851125	0.0170242	0.0808688	0.349787	0.149515	0.385173	0.367769	0.151483	0.367955	-0.0593989	0.555978	0.872335	-0.0615856	0.503893	0.868497	0.0481012	0.404577	0.784493	0.0892442	0.313507	0.741581
NM_001005365	POTEA	0.145186	0.0760026	0.350599	1.45176	0.0131765	0.0964859	-1.68352	0.186315	0.374563	0.192666	0.20539	0.462162	1.45713	0.00483213	0.0478726	0.131422	0.291379	0.722285	0.401625	0.0784983	0.513439	0.203347	0.207284	0.638263	-0.15565	0.574665	0.886265
NM_001005366	KDM2B	-0.0325265	0.103116	0.350599	0.46642	0.195058	0.434366	-0.462964	0.0726896	0.205544	0.0937028	0.246257	0.512955	-0.0457956	0.326554	0.565704	-0.450364	0.919476	0.994555	0.187738	0.228275	0.711981	0.0808546	0.359006	0.754823	0.0516654	0.351682	0.768345
NM_001005368	ZNF32	NA	NA	NA	NA	NA	NA	NA	NA	NA	0.231012	0.190645	0.443545	NA	NA	NA	-0.330566	0.851042	0.977467	-0.416692	0.838256	0.977107	-0.590625	0.958597	0.996692	-0.295488	0.710018	0.934923
NM_001005369	MTIF2	-0.0279346	0.10237	0.350599	-0.711256	0.700829	0.851713	-0.646319	0.0852855	0.227092	0.606321	0.0825836	0.272746	0.639516	0.077578	0.249297	-0.125774	0.644466	0.91141	0.737595	0.00684278	0.210204	-0.0442083	0.534967	0.85573	1.07799	0.000688498	0.0704583
NM_001005374	LRSAM1	0.0327292	0.0925421	0.350599	1.21109	0.0300088	0.155905	0.270793	0.034393	0.127691	0.437716	0.123117	0.34336	0.140494	0.240169	0.479464	0.308448	0.112281	0.532027	-0.0385333	0.476853	0.857136	0.210615	0.19937	0.630374	-0.349613	0.755085	0.952519
NM_001005376	PLAUR	-0.204766	0.134694	0.350599	1.9356	0.00188567	0.0311418	-0.943464	0.109227	0.266365	-1.65151	0.930418	0.984959	-0.159692	0.38447	0.618049	0.0925555	0.342495	0.761456	0.111494	0.305804	0.769404	0.0332396	0.425494	0.796249	0.097227	0.305551	0.736282
NM_001005404	YPEL2	-0.353407	0.165544	0.351115	0.400615	0.21961	0.463054	-4.28719	0.563383	0.738523	1.23323	0.0137128	0.0920734	1.23972	0.01137	0.0803762	0.533783	0.0195247	0.290867	0.290679	0.143112	0.620188	0.164888	0.2503	0.673741	0.180376	0.2281	0.670873
NM_001005405	KRTAP5-11	-0.224907	0.138703	0.350599	-0.0551328	0.421031	0.65514	-3.8652	0.501065	0.688207	0.352223	0.148685	0.383632	2.66848	1.9e-05	0.00153459	0.238023	0.171421	0.613283	0.0826191	0.33731	0.788556	0.0922122	0.343386	0.746814	0.032432	0.372323	0.783169
NM_001005417	B4GALT2	-1.7057	0.503959	0.580914	-0.0789869	0.432198	0.665328	-5.92715	0.764382	0.879733	0.613802	0.0810944	0.269942	-1.43048	0.861726	0.934983	-0.222949	0.757526	0.951232	-0.101454	0.550428	0.889449	-0.565902	0.952629	0.995712	-0.034441	0.443429	0.822352
NM_001005463	EBF3	-2.01595	0.574087	0.633576	2.75261	4.84e-05	0.00429352	-12.1606	0.984046	0.995307	0.320995	0.158837	0.399471	1.02322	0.0241374	0.12449	0.623703	0.0081716	0.213152	0.980388	0.000738675	0.0898722	0.612362	0.00866327	0.209731	1.42856	4.42e-05	0.0217227
NM_001005465	OR10G3	-0.0836894	0.112058	0.350599	0.729898	0.112276	0.325842	-0.267077	0.0603149	0.182356	0.879468	0.0401979	0.177121	-1.67705	0.899338	0.95372	0.174853	0.238931	0.685696	0.466898	0.0526868	0.447986	0.0766773	0.364773	0.758687	0.18465	0.224396	0.668345
NM_001005466	OR10G2	-0.393671	0.174295	0.352893	-0.180822	0.480162	0.701777	-4.00203	0.521514	0.706413	2.45078	0.000250272	0.00813929	0.157385	0.23278	0.471719	0.345509	0.0878221	0.486574	0.353155	0.103282	0.558257	0.249924	0.16005	0.586097	0.338778	0.115194	0.531397
NM_001005467	OR8B3	0.105127	0.0815968	0.350599	2.26112	0.000454073	0.0143219	-4.59705	0.606343	0.770097	1.04152	0.0249959	0.132059	1.71492	0.00168671	0.02579	0.00156126	0.469509	0.832824	0.603547	0.0204139	0.326904	0.335504	0.093064	0.479652	0.552499	0.0356473	0.346261
NM_001005468	OR8B2	-0.251644	0.144063	0.350599	0.829706	0.0885065	0.28704	-1.65689	0.183251	0.370777	-0.31996	0.451111	0.709755	0.140572	0.240146	0.479459	-0.238669	0.773401	0.957267	0.00447518	0.426499	0.835495	-0.0967296	0.605907	0.887522	-0.216255	0.636525	0.91083
NM_001005469	OR5B3	-0.434121	0.183465	0.35734	0.302564	0.259116	0.505319	-3.98757	0.519459	0.70477	0.543205	0.0961504	0.297509	1.50009	0.00408905	0.0435683	-0.439983	0.914932	0.994502	-0.180195	0.637724	0.920029	-0.400688	0.889328	0.981524	-0.715618	0.938216	0.996584
NM_001005470	OR4B1	0.106759	0.0813577	0.350599	1.67611	0.00561706	0.0594297	4.10296	6.16e-05	0.00204082	0.634387	0.0770004	0.261725	0.425412	0.132963	0.343101	0.167423	0.247444	0.691252	-0.025969	0.462001	0.851118	0.104807	0.326675	0.733816	0.180774	0.227746	0.670719
NM_001005471	OR2T6	-1.11231	0.355142	0.47255	-1.38312	0.868075	0.940943	0.102219	0.0413241	0.144044	-1.67062	0.932904	0.985835	-1.49772	0.873058	0.940788	0.00629813	0.462846	0.828827	0.0231466	0.404828	0.824368	0.0566571	0.392511	0.776761	-0.363406	0.766146	0.955819
NM_001005473	PLCXD3	-1.23891	0.388046	0.495961	-1.35553	0.863448	0.938708	-0.774181	0.0950638	0.243816	-1.78938	0.946936	0.990328	-1.03654	0.768113	0.883297	-0.54921	0.952893	0.998743	-1.36835	0.998023	0.999863	-1.27814	0.999012	0.999918	-0.592161	0.897867	0.988396
NM_001005474	NFKBIZ	0.186924	0.0703773	0.350599	1.11599	0.0401329	0.185449	-1.42217	0.156346	0.3353	0.350856	0.149152	0.384538	0.703018	0.0652137	0.225576	0.708391	0.00333207	0.150292	0.469184	0.051914	0.445769	0.0157596	0.450233	0.810212	0.116978	0.286226	0.71836
NM_001005479	OR5H6	-0.232164	0.140143	0.350599	0.75404	0.10619	0.316174	0.930923	0.0154409	0.0760896	-0.782797	0.685671	0.871722	-1.63819	0.894485	0.951624	-0.0269527	0.510132	0.851595	-0.269541	0.725333	0.948567	-0.107864	0.620478	0.893765	-0.524297	0.867945	0.984133
NM_001005480	OR2A2	-0.138561	0.122063	0.350599	1.27014	0.0247029	0.14079	2.22916	0.00219704	0.0206246	0.836881	0.0451929	0.191064	-0.501214	0.557228	0.751141	-0.164065	0.691226	0.928679	-0.278566	0.733469	0.951788	-0.0965834	0.605719	0.887458	-0.0150293	0.422581	0.811657
NM_001005482	OR5H2	-0.358375	0.166617	0.351141	0.309052	0.256377	0.502055	-1.46903	0.161619	0.342848	-0.59166	0.594138	0.814377	0.318142	0.168688	0.390795	-0.209771	0.743545	0.94674	-0.467361	0.86755	0.983218	0.158218	0.258443	0.679173	0.320608	0.125728	0.548226
NM_001005483	OR4K5	-0.29135	0.152206	0.350599	0.256842	0.278673	0.526471	-1.60733	0.177285	0.363014	0.198321	0.203208	0.459707	-0.0132284	0.310445	0.55012	0.110792	0.318166	0.742518	-0.758345	0.962595	0.998931	-0.232867	0.763185	0.944416	-0.240164	0.660011	0.919426
NM_001005484	OR4F5	-0.643226	0.233533	0.384372	1.69113	0.00531434	0.0577098	-3.05515	0.377034	0.578627	-0.940774	0.751962	0.908813	-0.268118	0.44006	0.6644	-0.0156547	0.494005	0.843428	-0.273761	0.729101	0.950042	-0.608869	0.962378	0.996692	-0.788562	0.954742	0.997599
NM_001005486	OR4K15	-0.412261	0.178466	0.354427	1.49865	0.0109797	0.0864304	-2.26369	0.260919	0.461226	0.821605	0.04712	0.19595	0.0969895	0.259196	0.498989	-0.512361	0.942128	0.997546	-0.00676934	0.439506	0.840601	-0.421722	0.900316	0.984054	-0.708193	0.936317	0.996393
NM_001005487	OR13G1	0.118522	0.0796607	0.350599	0.572367	0.158442	0.389892	3.30147	0.000301153	0.00562542	-1.1529	0.825208	0.943816	-2.24685	0.948711	0.976208	-0.2201	0.754551	0.950691	0.504256	0.0413819	0.414081	0.0305376	0.429364	0.798009	0.176261	0.231622	0.673128
NM_001005489	OR5B17	0.273074	0.0596487	0.350599	0.0119183	0.389679	0.627925	-0.178936	0.0552273	0.171873	0.814835	0.0480043	0.198206	0.444479	0.127341	0.334961	0.541206	0.0182782	0.284891	0.336073	0.113332	0.574901	0.488449	0.028244	0.318967	0.395182	0.0868009	0.475821
NM_001005490	OR6C74	0.437032	0.0425336	0.350599	0.514487	0.177919	0.414936	1.2358	0.0102232	0.0577173	0.0186972	0.280073	0.550473	0.503156	0.110516	0.308386	0.715317	0.00307514	0.144458	0.276286	0.153498	0.635645	0.225229	0.184191	0.615265	0.531296	0.0404407	0.362982
NM_001005491	OR10AG1	-0.13607	0.121603	0.350599	1.08351	0.044331	0.194918	-0.482274	0.0738714	0.20758	-0.279848	0.429711	0.691825	-0.865669	0.711436	0.851565	0.08574	0.351766	0.767628	0.485922	0.046657	0.429934	0.0683883	0.376226	0.766243	0.0967628	0.305988	0.736537
NM_001005492	OR5J2	0.141883	0.0764321	0.350599	0.261585	0.276623	0.524057	0.805006	0.018149	0.084522	0.461971	0.116612	0.333646	-0.747885	0.667092	0.825278	0.229448	0.179847	0.623953	0.420463	0.070138	0.495984	-0.0046726	0.479467	0.827238	-0.0777064	0.490805	0.848703
NM_001005493	OR6C6	0.323179	0.0539158	0.350599	1.50327	0.01078	0.0854997	0.394466	0.0299305	0.11698	0.517085	0.10247	0.309062	0.566199	0.0943395	0.281979	0.355425	0.0820271	0.473042	0.698184	0.00955862	0.238915	-0.339438	0.852008	0.970875	0.578546	0.0301574	0.321978
NM_001005494	OR6C4	0.0818975	0.084993	0.350599	1.09201	0.0432148	0.192726	-0.142048	0.0532447	0.168182	0.428881	0.125466	0.347711	1.79403	0.00118006	0.0202935	-0.171446	0.700088	0.932075	0.394955	0.0815614	0.518543	0.0490605	0.403222	0.783684	0.0550207	0.348235	0.765556
NM_001005495	OR2T3	-2.27488	0.62779	0.675854	-1.21005	0.836309	0.926389	-5.42488	0.711131	0.844733	-1.45578	0.898467	0.975312	-1.00882	0.759428	0.878921	-0.683487	0.978336	0.999859	-0.402926	0.829244	0.974736	-0.414003	0.896545	0.983419	-0.314036	0.726056	0.941503
NM_001005496	OR5D16	0.0101768	0.0961037	0.350599	-1.19275	0.832783	0.923945	3.46634	0.000207613	0.00434865	-0.796282	0.691598	0.875083	-0.0531882	0.330255	0.568916	-0.170595	0.69914	0.931708	0.213044	0.20545	0.689438	0.0902876	0.346075	0.748599	-0.0920293	0.506616	0.855932
NM_001005497	OR6C75	-0.16155	0.126348	0.350599	1.44753	0.0133783	0.0971928	-4.0428	0.527715	0.710955	1.50001	0.00580006	0.0544281	0.449061	0.12583	0.332487	0.33534	0.0939242	0.498736	-0.0401304	0.47876	0.858158	0.293639	0.12286	0.53055	-0.0692789	0.481501	0.843382
NM_001005498	RHBDF2	-0.327332	0.15984	0.350599	-0.318553	0.542895	0.747785	-0.95437	0.110226	0.267845	1.37089	0.00888883	0.070854	-1.40729	0.85736	0.93277	0.208089	0.201666	0.646384	0.0919057	0.327069	0.782138	0.312859	0.108407	0.505596	0.188596	0.220962	0.663897
NM_001005499	OR6C70	-0.249332	0.143606	0.350599	-0.0611901	0.423806	0.65745	-0.306035	0.0627356	0.187367	0.149511	0.22288	0.485044	-0.779615	0.67935	0.832843	0.227046	0.182196	0.626126	0.305493	0.132869	0.604393	0.252907	0.157244	0.582352	-0.128331	0.546065	0.873708
NM_001005500	OR4M1	-2.10403	0.592783	0.64817	0.0716192	0.362058	0.60412	-7.8326	0.900182	0.960791	0.283454	0.171756	0.418207	-0.938578	0.73696	0.866229	0.0599573	0.387134	0.787845	0.398387	0.0799777	0.515837	0.515645	0.0221379	0.29179	-0.0784476	0.491694	0.849209
NM_001005501	OR4K2	-0.331441	0.160763	0.350599	0.55369	0.164602	0.397866	-2.85369	0.346652	0.550784	-0.361066	0.473079	0.72633	1.3353	0.00790156	0.0649139	-0.0262656	0.509116	0.851399	0.154874	0.260491	0.739165	0.143611	0.276482	0.696268	-0.258328	0.676789	0.924748
NM_001005503	OR11G2	0.0840785	0.0846578	0.350599	-0.435866	0.594113	0.783374	4.85407	6.84e-06	0.000442243	-0.412477	0.500934	0.747983	0.0273678	0.291298	0.532329	0.29414	0.123024	0.549212	0.083481	0.336368	0.787844	0.0186782	0.44609	0.807462	-0.059985	0.471519	0.838275
NM_001005504	OR4F21	-0.449499	0.186888	0.359023	0.36809	0.231987	0.476185	-2.46797	0.289884	0.492949	-0.260489	0.419656	0.68326	0.562378	0.095262	0.283437	0.153969	0.263573	0.700437	-0.349788	0.79195	0.965537	0.189983	0.221787	0.650499	-0.682617	0.929259	0.995959
NM_001005512	OR4A47	-1.67333	0.496298	0.575883	-0.482895	0.613829	0.796054	-7.28076	0.870422	0.94525	1.02893	0.0260679	0.135712	0.0414285	0.284646	0.525424	0.230965	0.178332	0.621941	0.165181	0.250186	0.728303	-0.186044	0.714208	0.927239	-0.131191	0.54913	0.875682
NM_001005513	OR4C45	0.378855	0.0480913	0.350599	0.260178	0.277256	0.524739	0.716046	0.0202959	0.0908442	4.90879	4.17e-06	0.000718232	-0.469433	0.541771	0.741408	0.136398	0.285089	0.717408	0.10942	0.307911	0.770509	0.654115	0.00566043	0.180502	0.615486	0.0237201	0.292972
NM_001005514	OR5H14	-2.48783	0.66914	0.709786	-1.21007	0.836313	0.926389	-5.85798	0.75749	0.875838	-2.19308	0.976572	0.997298	-0.690192	0.64288	0.810043	-0.256164	0.789969	0.96201	-0.0992153	0.54789	0.887788	-0.112712	0.626532	0.895818	-0.510673	0.860853	0.982614
NM_001005515	OR5H15	-0.358706	0.166688	0.351141	-0.227181	0.501652	0.71832	-2.21663	0.254545	0.454356	0.15809	0.219341	0.48077	2.30892	0.000113995	0.00500363	-0.300921	0.82869	0.972866	-0.497352	0.882894	0.985186	-0.311911	0.832098	0.965781	-0.324641	0.734976	0.94437
NM_001005516	OR5K3	-0.633796	0.231194	0.382684	-0.607188	0.66317	0.82802	-1.09678	0.123324	0.28817	-0.259554	0.419152	0.68287	-0.57166	0.590445	0.774306	-0.0703722	0.571006	0.87993	-0.442789	0.853915	0.980297	0.0103553	0.457921	0.814528	-0.5172	0.86426	0.982822
NM_001005517	OR5K4	-1.29361	0.402159	0.506676	-0.172936	0.476447	0.699047	-3.70419	0.476688	0.667756	-1.41879	0.891219	0.972544	0.12149	0.248567	0.48791	-0.104337	0.617117	0.900382	-0.240058	0.698135	0.939226	-0.301689	0.824167	0.963002	0.0885444	0.314262	0.741951
NM_001005518	OR6C65	0.181027	0.0711402	0.350599	1.18644	0.0324557	0.163647	-0.369963	0.066719	0.194718	1.00347	0.0280263	0.141412	-1.09583	0.785448	0.892658	0.414574	0.0529438	0.407696	0.88334	0.00192297	0.139946	0.40068	0.058182	0.4159	0.745982	0.00957674	0.202365
NM_001005519	OR6C68	-0.365704	0.168227	0.351264	0.744224	0.108542	0.319963	-1.74613	0.193833	0.383603	-0.621933	0.609173	0.824029	0.16102	0.231153	0.469891	-0.198091	0.730733	0.94327	-0.202985	0.661422	0.92881	-0.207455	0.73749	0.935576	0.192534	0.217599	0.662406
NM_001005522	OR2T8	-0.376084	0.170442	0.351878	1.85116	0.00270973	0.0388103	-1.34153	0.147615	0.322746	1.12005	0.0197652	0.11478	1.02236	0.0242324	0.124845	-0.170954	0.699566	0.931864	-0.387994	0.819209	0.971349	0.0585567	0.389825	0.775055	-1.00394	0.982637	0.999781
NM_001005566	OR5B2	0.182172	0.0709963	0.350599	0.697781	0.120601	0.337799	3.55258	0.000180235	0.00393173	0.644394	0.0751484	0.258346	0.963072	0.0294635	0.140863	0.37607	0.0708265	0.4504	0.0140829	0.415531	0.829768	0.226844	0.182667	0.614495	0.111691	0.291335	0.72248
NM_001005567	OR51B5	-0.271871	0.148198	0.350599	0.963354	0.0622575	0.236891	-1.75432	0.194869	0.384929	0.342326	0.151917	0.388814	-0.638845	0.620702	0.795742	-0.0880388	0.595093	0.890741	0.355881	0.101722	0.555307	0.33198	0.0953582	0.484209	-0.242914	0.662696	0.920032
NM_001005619	ITGB4	-0.430207	0.182568	0.356634	0.366557	0.232568	0.476837	-1.2071	0.133906	0.3033	-1.26204	0.855528	0.957493	0.381756	0.146853	0.361425	-0.167354	0.695142	0.930262	-0.268289	0.724257	0.948567	-0.445233	0.911302	0.987108	-0.159556	0.578724	0.887489
NM_001005738	FPR2	-2.5014	0.671686	0.711875	-1.7267	0.913205	0.962347	-7.81948	0.899538	0.960522	0.894234	0.0385774	0.173253	-1.35364	0.847118	0.928042	0.47706	0.0322107	0.347659	0.604653	0.0202333	0.326846	0.28832	0.127089	0.537112	0.247477	0.174489	0.613164
NM_001005742	GBA	-1.66626	0.494694	0.574987	-0.286804	0.528819	0.737281	-6.80971	0.839864	0.928198	0.730739	0.0600278	0.225742	-0.299256	0.456188	0.676734	0.0357067	0.421081	0.805433	-0.018203	0.452788	0.846658	0.242092	0.167475	0.593655	0.304657	0.135439	0.562686
NM_001005744	NUMB	-0.760899	0.263165	0.405633	1.00766	0.0552162	0.220941	-4.11799	0.53881	0.719564	-1.36236	0.879515	0.968063	1.4291	0.00544855	0.051648	-0.0691611	0.569376	0.879686	-0.714759	0.954389	0.996533	0.0590927	0.389079	0.774821	-0.553762	0.881775	0.985446
NM_001005746	CACNB4	-0.855483	0.287639	0.423417	1.01326	0.0542996	0.218655	-4.67279	0.61664	0.777457	1.23305	0.0137149	0.0920734	-0.995451	0.755248	0.877158	-0.402663	0.896226	0.989588	-0.905084	0.981328	0.999863	-0.31645	0.835597	0.966503	-0.506174	0.858416	0.982568
NM_001005747	CACNB4	-0.288543	0.151626	0.350599	0.137058	0.331768	0.576362	-1.90046	0.212996	0.407267	0.303699	0.164556	0.407489	0.305533	0.173345	0.397156	-0.4497	0.919133	0.994502	-0.119862	0.571446	0.89811	0.736406	0.00219793	0.123277	-0.606863	0.903695	0.989816
NM_001005751	WASHC2A	-0.767566	0.2649	0.406921	-0.319794	0.543469	0.748202	-3.43006	0.434864	0.631797	1.13849	0.0185368	0.110532	-0.458904	0.536426	0.73795	0.254832	0.156019	0.596658	0.24568	0.177292	0.656936	0.297416	0.120043	0.526246	0.374092	0.0968474	0.496371
NM_001005752	GJB3	-1.01112	0.328615	0.453175	-0.218222	0.49757	0.715266	-4.86152	0.642044	0.795763	1.0895	0.0217153	0.121275	-0.0542555	0.330804	0.569011	-0.130096	0.650115	0.913832	0.196112	0.220597	0.705591	0.048605	0.403934	0.784014	0.0613744	0.341571	0.759111
NM_001005783	HAO2	-2.15475	0.603361	0.656653	-0.857121	0.748183	0.878416	-8.07481	0.910825	0.965908	0.716222	0.0624137	0.23119	-0.403291	0.508843	0.715903	0.0233639	0.438607	0.816623	-0.114893	0.565775	0.895928	-0.251494	0.78115	0.949927	-0.21084	0.631059	0.908724
NM_001005785	DAZ2	-0.1415	0.122617	0.350599	-0.0301778	0.409307	0.645542	0.645446	0.0222123	0.0964246	1.4647	0.00656339	0.0592186	-0.886913	0.718875	0.855537	-0.0339063	0.519973	0.855409	-0.189148	0.646947	0.923126	-0.0569957	0.55231	0.865092	-0.28595	0.701858	0.932142
NM_001005850	ZNF835	0.127949	0.078334	0.350599	1.17725	0.0334038	0.166208	0.237121	0.0357459	0.130975	-1.107	0.810994	0.937661	0.204425	0.213087	0.447863	0.152172	0.26562	0.702396	0.203401	0.213885	0.697035	0.0763033	0.365232	0.758861	0.577543	0.0303782	0.322786
NM_001005851	ZNF780B	-0.456203	0.188441	0.35954	-0.345866	0.555086	0.755917	-1.34004	0.147437	0.322549	0.391348	0.136588	0.365213	-0.530252	0.571135	0.76056	0.55802	0.015727	0.274355	0.0676058	0.354167	0.797321	0.370466	0.0726723	0.444092	0.734523	0.0103696	0.209281
NM_001005853	OR6B2	-0.293742	0.152712	0.350599	-1.12983	0.81947	0.916666	-1.34662	0.148229	0.323608	1.44441	0.00701596	0.0615719	-0.14292	0.37598	0.610146	0.0526262	0.397554	0.795947	0.316172	0.125739	0.594712	0.402816	0.0572406	0.413887	0.561732	0.033616	0.337654
NM_001005855	ATP8B2	0.219501	0.0661462	0.350599	1.69816	0.00517139	0.0568828	1.41881	0.0078505	0.0486358	1.36057	0.0091683	0.0721393	0.498025	0.111812	0.310584	0.071418	0.371295	0.77932	0.52149	0.0367531	0.401264	-0.0115242	0.48913	0.832468	0.296622	0.140425	0.567838
NM_001005909	IP6K2	-0.419905	0.180233	0.355771	1.19768	0.0313353	0.160127	-4.06288	0.530813	0.713325	-0.0662443	0.32072	0.592153	1.25183	0.0108823	0.0784855	0.148666	0.269888	0.705885	-0.342236	0.786208	0.964196	-0.183329	0.711167	0.926521	0.125326	0.278197	0.712306
NM_001005914	SEMA3B	-1.91559	0.551982	0.617131	0.459444	0.197659	0.437498	-8.04838	0.909679	0.965377	-0.318603	0.450448	0.70901	0.245185	0.196825	0.427206	0.30143	0.117421	0.540933	-0.450599	0.858224	0.980927	0.0890182	0.347834	0.749023	-0.82781	0.961763	0.998506
NM_001005915	ERBB3	-0.364662	0.167989	0.351264	1.50846	0.0105824	0.0847182	-3.93144	0.510976	0.697354	-0.462393	0.527565	0.767475	1.42673	0.00551188	0.0521411	-0.268687	0.801607	0.965591	0.181401	0.234267	0.715581	-0.263545	0.791931	0.952863	-0.549604	0.879888	0.985446
NM_001005920	JMJD8	0.240847	0.0634853	0.350599	1.41003	0.0153187	0.105292	0.364015	0.0309959	0.119391	0.0116216	0.283512	0.554568	0.595934	0.0872718	0.26811	-0.165532	0.69297	0.929274	0.500125	0.0425441	0.416653	0.383102	0.0662732	0.432884	0.245692	0.175804	0.613536
NM_001005922	KRTAP5-1	NA	NA	NA	NA	NA	NA	NA	NA	NA	1.87674	0.00170394	0.0258748	0.407276	0.138724	0.35106	-0.323394	0.845928	0.976464	-0.378346	0.812515	0.970152	-0.274337	0.801455	0.956522	-0.473253	0.840016	0.977244
NM_001006	RPS3A	-3.14507	0.778201	0.800337	0.0841914	0.355998	0.598375	-14.3605	0.995234	0.999924	-0.423011	0.506547	0.751933	2.11905	0.000259656	0.00787304	0.0785475	0.361409	0.772958	-0.51161	0.88969	0.986673	0.011133	0.456859	0.813909	0.121242	0.282238	0.715541
NM_001006109	HMCES	-0.160579	0.126152	0.350599	0.498359	0.183542	0.421319	-0.693919	0.0889769	0.233454	1.79725	0.00222742	0.0302291	-2.24401	0.948525	0.976174	-0.00642546	0.480683	0.837498	0.389604	0.0841709	0.523548	-0.0219427	0.504194	0.84181	-0.230188	0.650209	0.916404
NM_001006115	IP6K1	0.269101	0.060097	0.350599	0.281704	0.267977	0.51443	0.595794	0.0236496	0.100203	0.512653	0.103719	0.311437	0.420639	0.134392	0.345062	0.253308	0.157392	0.598322	0.548561	0.0303339	0.374591	0.155281	0.262092	0.683763	0.119256	0.284055	0.716783
NM_001006117	RBMY1J	-0.700109	0.247872	0.394634	0.437048	0.205891	0.447567	-2.07943	0.236373	0.433943	-0.409611	0.499395	0.746662	-0.748445	0.667296	0.82536	-0.0838821	0.589413	0.888405	-0.185516	0.64319	0.921826	-0.111938	0.625538	0.89541	-0.199018	0.619275	0.904455
NM_001006121	RBMY1B	-1.76224	0.517191	0.590715	-0.763035	0.718384	0.861747	-4.99602	0.658961	0.807548	-0.69265	0.643715	0.846075	-0.597241	0.602127	0.782866	-0.113954	0.629558	0.905774	-0.124026	0.576285	0.9	-0.167544	0.693094	0.919599	0.0241697	0.381121	0.788323
NM_001006607	LRRC37A2	-0.0509863	0.106244	0.350599	0.397709	0.220724	0.464356	2.00026	0.00319404	0.0264352	-0.418987	0.504426	0.750553	0.53341	0.102617	0.296217	-0.198171	0.730791	0.94327	0.0536415	0.370072	0.807895	-0.244569	0.774546	0.948258	0.185153	0.223977	0.66782
NM_001006610	SIAH1	-1.83133	0.532979	0.602796	-0.926397	0.768288	0.889268	-6.72718	0.83378	0.924201	0.828274	0.0462399	0.19354	-0.500008	0.556683	0.751093	-0.575586	0.959533	0.999859	-0.569909	0.913517	0.99053	-0.279038	0.80547	0.957527	-0.561053	0.885037	0.985749
NM_001006625	PDPN	-0.229609	0.139623	0.350599	0.0453253	0.374167	0.614553	-1.18503	0.131836	0.300776	-0.563011	0.579568	0.804058	0.78428	0.0515934	0.196556	0.10362	0.327484	0.750177	0.297017	0.13864	0.612623	0.248658	0.161278	0.588032	-0.2933	0.708077	0.934417
NM_001006626	CHRM2	-0.401564	0.176065	0.353545	-0.31439	0.541077	0.746079	-0.575416	0.0801066	0.218137	-0.194032	0.385115	0.653354	-0.077003	0.342283	0.579596	-0.399157	0.894329	0.989472	-0.323567	0.771611	0.960499	-0.323061	0.840386	0.967019	-0.560469	0.884796	0.985749
NM_001006627	CHRM2	-0.744061	0.258874	0.402725	-0.826873	0.738874	0.873438	-1.16737	0.130109	0.298284	-0.0895592	0.332199	0.604806	0.297412	0.176541	0.4014	-0.681618	0.978097	0.999859	-0.905223	0.981344	0.999863	-0.607273	0.962057	0.996692	-0.782127	0.953513	0.997599
NM_001006628	CHRM2	-0.393561	0.174268	0.352893	1.09978	0.0422099	0.190601	-0.673079	0.0873616	0.230702	0.995994	0.0286916	0.143715	0.60045	0.0862374	0.265889	-0.38589	0.886953	0.987932	-0.400057	0.827373	0.974393	-0.255566	0.784799	0.950683	-0.53273	0.872134	0.984391
NM_001006636	GTDC1	-2.48614	0.668826	0.709529	-0.247446	0.510971	0.725051	-8.81715	0.936685	0.979503	-1.36673	0.88042	0.968235	0.486758	0.114952	0.315752	-0.168222	0.696196	0.93051	-0.456658	0.861677	0.981734	-0.204902	0.734688	0.934768	-0.257435	0.67592	0.924675
NM_001006640	TCEAL1	0.0931448	0.0833254	0.350599	0.124729	0.337339	0.581798	-0.721561	0.0911078	0.23697	0.488343	0.109755	0.32294	0.481068	0.116484	0.317777	0.112302	0.316237	0.741157	0.123644	0.292879	0.761033	0.146576	0.272789	0.692628	0.248539	0.173704	0.612304
NM_001006641	SLC25A25	-1.66606	0.49465	0.574987	-0.232172	0.504074	0.720172	-4.93121	0.650729	0.801863	-0.955622	0.757689	0.911601	-0.545244	0.578131	0.765262	0.0897712	0.346252	0.762822	0.686191	0.0105683	0.249215	0.386363	0.0647778	0.430612	0.587562	0.0284552	0.31527
NM_001006655	FAM149A	-2.35354	0.643548	0.688426	-1.03055	0.795749	0.903746	-6.36033	0.80426	0.90562	-2.21392	0.977521	0.997613	0.190627	0.218732	0.454955	0.156548	0.260427	0.698155	0.22894	0.191403	0.673485	-0.00377896	0.478155	0.826502	0.343177	0.112717	0.526024
NM_001006665	RPS6KA1	-0.518123	0.203048	0.367146	1.32665	0.0203786	0.125134	-4.0521	0.529178	0.712153	0.907116	0.0372113	0.169387	1.34087	0.00771579	0.0639578	-0.746746	0.985142	0.999859	-0.250924	0.708322	0.942924	-0.336816	0.850253	0.970519	-0.738006	0.943756	0.997236
NM_001006683	SPIN2B	-0.654492	0.236371	0.386407	-0.669135	0.686036	0.841838	-1.92058	0.215568	0.410198	-0.970119	0.76322	0.914176	0.941865	0.0314352	0.145636	-0.18281	0.713304	0.936712	0.0280331	0.399122	0.822473	0.138696	0.282701	0.700843	0.0956132	0.30715	0.737224
NM_001006932	RPS6KA2	-2.30215	0.633308	0.680486	-1.45152	0.878622	0.947218	-7.84492	0.900752	0.961214	-1.45953	0.899174	0.975851	1.54736	0.0033333	0.0381773	0.185532	0.226551	0.672842	0.194476	0.222084	0.706082	0.43602	0.044045	0.37387	0.108223	0.294785	0.725921
NM_001006938	TCEAL6	NA	NA	NA	0.00346197	0.393684	0.63204	NA	NA	NA	0.302481	0.164971	0.408081	2.06666	0.00035043	0.00968262	0.41367	0.053293	0.409184	0.607458	0.0198017	0.323459	0.690478	0.0037114	0.149496	0.0305794	0.374274	0.78402
NM_001006939	LRRC18	0.0148268	0.095371	0.350599	0.518204	0.176643	0.413151	4.01246	7.53e-05	0.00231015	1.17409	0.0165972	0.103105	0.0725901	0.270131	0.510466	-0.126435	0.645323	0.911592	0.00431363	0.426677	0.835529	0.385621	0.0651291	0.430773	-0.204193	0.624506	0.906838
NM_001006941	ALG3	-0.904826	0.300609	0.432912	-1.43121	0.875613	0.945387	0.144204	0.0394168	0.139851	-2.8138	0.993478	0.99968	0.481502	0.116347	0.317695	0.116937	0.310141	0.735123	0.212829	0.205649	0.689548	0.0950573	0.33966	0.74366	-0.0688623	0.481017	0.843157
NM_001006946	SDC1	-0.670881	0.240515	0.389425	1.64772	0.00626243	0.062782	-3.58748	0.458847	0.65282	-0.414947	0.502323	0.749108	-0.328823	0.471159	0.688309	-0.422323	0.906576	0.993189	-0.0614266	0.503714	0.868442	0.0676095	0.377266	0.767141	-1.06126	0.986782	0.999781
NM_001007	RPS4X	-0.789488	0.270572	0.411238	-0.534087	0.634877	0.810553	-3.16335	0.393689	0.593636	0.493439	0.108437	0.32041	0.0460492	0.282601	0.523324	0.452431	0.0393786	0.369729	0.401848	0.0784261	0.513439	0.873112	0.000439587	0.0660076	0.507818	0.0466252	0.380524
NM_001007026	ATN1	-0.0532577	0.10665	0.350599	0.725015	0.113552	0.327588	-1.73786	0.19282	0.38273	-0.0567755	0.31606	0.58748	0.856588	0.0412747	0.172058	0.0922539	0.342906	0.761577	-0.140795	0.595174	0.906264	0.335881	0.0928412	0.479652	-0.107098	0.523022	0.863855
NM_001007033	CLEC6A	-0.695118	0.246594	0.393582	0.767102	0.102888	0.311251	-4.75466	0.627727	0.785877	0.764657	0.0548221	0.21365	0.442427	0.127922	0.335667	-0.320029	0.843435	0.975503	-0.00894376	0.442101	0.841608	0.0131837	0.453806	0.811835	-0.593037	0.898269	0.988654
NM_001007074	RPL32	-0.539433	0.208151	0.369594	0.0499938	0.372033	0.612935	4.6928	1.6e-05	0.000813156	-0.486802	0.540348	0.777366	-0.466194	0.540074	0.740419	-0.503628	0.939272	0.996872	-0.297571	0.749854	0.955111	-0.418491	0.898769	0.983819	-0.938042	0.976691	0.999781
NM_001007089	RESP18	-0.311991	0.15657	0.350599	1.77175	0.00377974	0.0471202	-0.826535	0.09941	0.251288	0.109752	0.239485	0.505613	0.266016	0.18863	0.4166	-0.0256753	0.508361	0.851399	-0.357318	0.797446	0.967052	-0.322446	0.839958	0.967019	-0.542524	0.876673	0.985252
NM_001007090	C8orf48	NA	NA	NA	-0.810985	0.73389	0.870746	NA	NA	NA	-1.78658	0.946634	0.990146	0.226475	0.20422	0.436716	0.398227	0.0599391	0.427277	0.451949	0.05797	0.464295	-0.144812	0.66652	0.91012	-0.0474214	0.457674	0.831455
NM_001007094	ZNF37A	-0.453467	0.187809	0.359223	-0.516475	0.627599	0.805761	-0.254835	0.0595963	0.180771	-0.0902475	0.332539	0.605132	-0.95231	0.741461	0.869042	0.403897	0.0573417	0.420587	0.449238	0.0589716	0.464928	0.499008	0.0257068	0.306836	0.642095	0.0199022	0.27341
NM_001007097	NTRK2	0.403019	0.0457139	0.350599	-0.5846	0.654532	0.82323	2.87384	0.000725504	0.0101022	0.0514752	0.26503	0.53378	-0.705869	0.649425	0.814067	0.370204	0.0739278	0.456279	0.121893	0.294637	0.761965	0.435279	0.044312	0.37448	0.6847	0.0149121	0.244776
NM_001007100	SCP2	-0.194772	0.132735	0.350599	0.8315	0.088105	0.286395	4.73165	1.14e-05	0.000675813	0.520852	0.101577	0.307249	-0.408591	0.511552	0.717832	-0.100272	0.611547	0.897807	-0.0282725	0.464804	0.852098	-0.303732	0.825821	0.963587	-0.346814	0.752928	0.951583
NM_001007101	ZNF484	-0.272328	0.148288	0.350599	1.07109	0.0460128	0.199239	1.75824	0.00469981	0.0344123	6.54884	2.09e-06	0.000718232	-0.0820479	0.344781	0.582146	0.201424	0.208865	0.652653	-0.303967	0.755348	0.956785	-0.458412	0.917041	0.988474	-0.528355	0.869976	0.984391
NM_001007125	LKAAEAR1	-0.862072	0.289348	0.424699	-0.26835	0.520473	0.73161	-3.19545	0.398756	0.59854	-0.512647	0.553932	0.785898	0.52816	0.104038	0.298933	-0.432324	0.911315	0.993597	-0.00566883	0.438171	0.840601	-0.13364	0.652883	0.905114	-0.116368	0.53306	0.867411
NM_001007139	IGF2	-0.240094	0.141741	0.350599	0.540356	0.169096	0.40344	-1.52642	0.168064	0.351094	0.757805	0.0557586	0.215884	-0.732117	0.660499	0.820824	0.160868	0.255275	0.695817	0.228926	0.191417	0.673485	-0.0205337	0.502263	0.841194	0.12827	0.275321	0.71023
NM_001007189	IGIP	-0.81721	0.277689	0.415832	0.898258	0.0742599	0.261279	-6.19592	0.78975	0.896256	0.383194	0.138993	0.368845	1.64563	0.00226091	0.0303689	0.40862	0.0552622	0.41377	-0.186672	0.644356	0.921974	0.393192	0.0615823	0.424598	-0.0668517	0.478905	0.842575
NM_001007214	CACYBP	-1.2524	0.39153	0.498442	-0.48552	0.614965	0.796807	-4.30232	0.565552	0.740333	0.323652	0.157961	0.398687	-0.545423	0.578203	0.765281	0.108791	0.32075	0.744852	-0.0248051	0.460648	0.851066	-0.178901	0.706091	0.924351	-0.0586637	0.470061	0.837648
NM_001007232	CARD17	-0.602173	0.223449	0.378375	-0.845553	0.744525	0.876483	-1.06256	0.120171	0.283595	0.091688	0.247135	0.514022	-0.592266	0.599889	0.781414	0.348868	0.085877	0.482378	0.0782802	0.342161	0.791432	0.0722265	0.370787	0.763157	-0.197962	0.618233	0.904199
NM_001007233	ERCC8	0.251694	0.06217	0.350599	0.405773	0.217692	0.461193	1.9793	0.00333321	0.02722	-0.15233	0.363743	0.633838	1.72793	0.00159593	0.0247988	0.0482513	0.403622	0.798757	0.794963	0.00429556	0.183541	-0.0560925	0.551089	0.864379	0.219656	0.195377	0.635835
NM_001007237	IGSF3	-0.700899	0.248054	0.394764	0.0763052	0.359805	0.602144	-1.76809	0.196623	0.387218	-1.08477	0.803734	0.934312	-0.0270448	0.317156	0.556609	-0.125613	0.644292	0.91141	-0.90489	0.981306	0.999863	0.0922544	0.343315	0.746814	-0.0424834	0.452249	0.827735
NM_001007248	ZNF599	0.0663694	0.0873274	0.350599	0.211849	0.298118	0.545443	2.79089	0.000837295	0.011086	-0.406463	0.49771	0.745263	1.38022	0.0065315	0.0574693	0.283974	0.131053	0.562267	-0.168079	0.624855	0.916169	0.461745	0.0355323	0.344646	-0.312162	0.724398	0.940363
NM_001007249		0.226922	0.0652415	0.350599	1.87598	0.00241752	0.0361735	0.321151	0.0325222	0.123195	1.85338	0.00183533	0.0269523	1.27677	0.00994503	0.0743021	0.332594	0.0956083	0.502658	0.128384	0.287833	0.758543	0.232448	0.177009	0.606647	0.214263	0.199672	0.640599
NM_001007253	ERV3-1	0.168781	0.0727766	0.350599	2.17667	0.000643271	0.0169735	2.03949	0.00299327	0.0253333	4.58471	4.17e-06	0.000718232	-0.713203	0.652511	0.815992	0.141294	0.278858	0.712614	0.116905	0.299962	0.766133	0.335688	0.0929516	0.479652	0.0812386	0.321557	0.746472
NM_001007257	PRDM2	-0.469671	0.191639	0.360977	1.25227	0.0261639	0.144827	-3.77684	0.487796	0.676456	-0.372672	0.479296	0.730458	1.01856	0.0245301	0.1257	0.0103255	0.4571	0.825633	0.444705	0.0606095	0.468728	-0.00924228	0.48598	0.830265	-0.275016	0.692057	0.929577
NM_001007261	SETD4	-0.849408	0.28608	0.422216	-1.00523	0.789415	0.900593	-2.51621	0.296866	0.500564	-0.397735	0.492842	0.740925	0.521546	0.105866	0.301775	0.157968	0.258751	0.698155	0.422847	0.0690882	0.493499	0.283137	0.131447	0.543758	0.0520501	0.351301	0.767966
NM_001007271	DUSP13	-0.249061	0.143557	0.350599	1.76287	0.00394161	0.0482012	5.1656	6.84e-06	0.000442243	-1.60581	0.92383	0.983326	-0.197937	0.404073	0.635101	-0.444419	0.916953	0.994502	-0.0424758	0.481384	0.858816	-0.489716	0.929289	0.991591	-0.0196335	0.427479	0.813986
NM_001007471	TRPM3	-0.0427642	0.104858	0.350599	0.824607	0.0896501	0.289286	-2.40712	0.281178	0.483577	-0.394952	0.491353	0.739549	1.80641	0.00112517	0.0198299	0.203381	0.206711	0.650008	0.291418	0.1426	0.619153	0.12181	0.304274	0.715594	0.159636	0.24637	0.684281
NM_001007523	F8A2	-1.74791	0.513832	0.588083	-0.879056	0.75471	0.88173	-3.83623	0.496694	0.684387	-2.164	0.975104	0.997244	-0.112337	0.360246	0.59663	-0.859812	0.992601	0.999859	-0.632911	0.934398	0.994643	-0.82704	0.988691	0.999792	-0.707256	0.936074	0.996393
NM_001007524	F8A3	-0.52924	0.205732	0.368544	0.62842	0.140805	0.366092	-1.51103	0.16633	0.348757	-0.897889	0.735089	0.898747	-0.336458	0.474999	0.690897	-0.159766	0.686242	0.926693	0.0675793	0.354205	0.797321	0.142247	0.27822	0.697479	0.230835	0.186748	0.62696
NM_001007525	NWD1	-0.814877	0.277094	0.415539	0.310909	0.255643	0.501171	-3.69743	0.475693	0.667	-0.278605	0.429	0.691241	0.405618	0.139188	0.351502	0.0239239	0.437729	0.816184	0.435094	0.0641724	0.47847	0.0745512	0.367591	0.761003	0.584921	0.028935	0.317199
NM_001007527	LMBRD2	-2.96625	0.751069	0.77667	-0.831677	0.740278	0.874114	-8.04732	0.909625	0.965368	-1.07829	0.801595	0.933195	-1.90771	0.924107	0.966291	0.935611	0.000238865	0.0561097	0.466241	0.0529076	0.448779	0.406808	0.0555244	0.408984	-0.579464	0.892761	0.987091
NM_001007530	CDRT15	0.419536	0.044156	0.350599	1.15924	0.0352937	0.171694	0.298337	0.0333321	0.125012	-1.05766	0.794821	0.929743	1.59018	0.00281188	0.0344848	0.382225	0.0677092	0.445066	0.247802	0.175552	0.655364	0.630579	0.00721003	0.197071	0.41754	0.0772723	0.458644
NM_001007531	NKAPL	0.00401401	0.0971005	0.350599	1.81288	0.0031701	0.0425779	3.22532	0.000351345	0.00620129	0.624746	0.0788816	0.265217	1.02515	0.0239897	0.124006	0.0493612	0.402122	0.798307	0.486632	0.0464402	0.429382	-0.260776	0.789478	0.952	-0.259161	0.677528	0.924983
NM_001007532	STH	-0.319405	0.158164	0.350599	0.470163	0.193656	0.432537	-2.25196	0.259343	0.459366	0.571702	0.0896934	0.285924	-0.0675254	0.3375	0.574713	-0.453395	0.920717	0.994761	-0.339819	0.784329	0.963768	-0.290139	0.814811	0.959613	-0.0222497	0.430399	0.815717
NM_001007533	PPP1R27	0.569256	0.0318045	0.350599	-1.25853	0.845838	0.93158	0.308117	0.0330104	0.124333	2.85772	7.3e-05	0.00367165	0.40144	0.140524	0.353358	0.291274	0.125274	0.552028	0.651738	0.0140991	0.28537	0.496957	0.0261665	0.308513	0.837057	0.0048516	0.150329
NM_001007534	C3orf56	-1.70921	0.504771	0.581536	1.29061	0.0230589	0.134713	-9.14989	0.945193	0.983011	-0.570149	0.58317	0.806211	1.59261	0.00278866	0.0343723	0.188784	0.222929	0.668919	0.111319	0.306	0.769404	0.142811	0.277524	0.696968	0.0286125	0.376414	0.785782
NM_001007537	C1QTNF9B	-0.196435	0.133058	0.350599	0.8239	0.0898161	0.289432	0.137744	0.0397019	0.140598	0.490615	0.109181	0.321894	0.935684	0.0320833	0.147512	-0.282989	0.813812	0.968716	0.179596	0.236121	0.715932	-0.341407	0.853288	0.971233	-0.34094	0.748311	0.950004
NM_001007538	SHISA2	0.252546	0.0620682	0.350599	1.21856	0.0293235	0.154353	0.498318	0.0264741	0.107441	0.415295	0.129309	0.354374	-1.03187	0.766705	0.882749	0.258523	0.152605	0.593145	0.0732054	0.347653	0.793077	0.384601	0.0655547	0.431233	0.293855	0.142254	0.570266
NM_001007540	CDHR4	-1.17349	0.371181	0.484089	-0.976487	0.782093	0.897241	-5.11062	0.6734	0.818165	1.11505	0.0200989	0.115963	0.278102	0.183927	0.4105	-0.292532	0.821869	0.97105	-0.34192	0.785987	0.964096	-0.425893	0.902285	0.984345	-0.050897	0.46134	0.833863
NM_001007544	RHEX	-1.63507	0.487217	0.569348	-0.987396	0.784902	0.89881	-4.82112	0.636632	0.791675	-0.499706	0.547176	0.781768	-0.232037	0.421521	0.648717	0.271123	0.141625	0.57809	0.302395	0.135025	0.608331	0.217595	0.192099	0.624056	0.355113	0.106587	0.514636
NM_001007561	IRGQ	-2.42219	0.656825	0.699565	0.30889	0.256442	0.502087	-11.0702	0.974092	0.99188	0.659006	0.0724694	0.253152	0.413573	0.136701	0.348468	0.110464	0.318602	0.743003	-0.144481	0.599098	0.908303	0.527747	0.0198155	0.279146	-0.275445	0.69245	0.929786
NM_001007563	IGFBPL1	-1.20714	0.37993	0.490399	-0.911385	0.764027	0.887004	-3.02924	0.372957	0.574808	-0.514673	0.554926	0.786819	-0.373282	0.493625	0.704864	-0.457936	0.922485	0.995131	-0.301181	0.752891	0.955712	-0.038847	0.52749	0.853398	-0.0871688	0.501295	0.853601
NM_001007565	TFG	-0.936282	0.308976	0.439859	0.40015	0.219772	0.463175	-3.69805	0.475794	0.667	0.12582	0.232709	0.496586	-0.573044	0.591099	0.774691	0.220099	0.189081	0.630593	0.394067	0.0819729	0.518892	0.67014	0.00474914	0.168311	0.26694	0.160326	0.592818
NM_001007595	C2CD4B	0.00096172	0.0975817	0.350599	0.568386	0.15972	0.391551	-1.1677	0.130139	0.29829	0.760076	0.0554561	0.215161	-0.156917	0.383094	0.61686	-0.0627328	0.560582	0.875069	0.036591	0.389109	0.816557	0.114984	0.313	0.721094	0.0822546	0.320565	0.745777
NM_001007792	NTRK1	-0.0940278	0.113901	0.350599	2.19954	0.000569694	0.0157522	-5.32137	0.699044	0.836509	1.67369	0.00335782	0.0384879	1.07203	0.0205719	0.11271	0.514331	0.0231759	0.312195	-0.0412138	0.480003	0.858234	-0.0573323	0.552717	0.865303	0.132892	0.270877	0.705517
NM_001007794	CEPT1	-0.0850974	0.112313	0.350599	-0.51431	0.626737	0.805216	0.776241	0.0187992	0.086349	0.688361	0.0671084	0.240958	0.645862	0.0762924	0.246928	0.296999	0.120844	0.546415	-0.11456	0.565408	0.895859	-0.344406	0.85535	0.97215	-0.178422	0.598072	0.894297
NM_001008	RPS4Y1	-0.515875	0.202499	0.366765	-0.386	0.57265	0.768652	1.74244	0.0048116	0.0349414	-0.50798	0.551431	0.783972	-0.895655	0.721788	0.857189	-0.415336	0.902987	0.991868	-0.420728	0.840741	0.977472	-0.237921	0.768175	0.9468	-0.989516	0.981569	0.999781
NM_001008215	COA5	-2.33013	0.638916	0.684838	-4.18457	0.991673	0.996968	-1.62464	0.179357	0.365697	-1.47939	0.902865	0.977364	-2.0319	0.934311	0.970477	0.692102	0.0039764	0.158103	-0.0497449	0.489922	0.862637	0.151725	0.266368	0.68788	0.524156	0.0421951	0.368149
NM_001008216	GALE	-1.54863	0.466244	0.553252	0.805281	0.0937893	0.295457	-9.5414	0.953467	0.98602	-0.191508	0.383861	0.652038	2.7331	1.27e-05	0.00114015	0.205333	0.204623	0.648715	-0.327901	0.775148	0.960875	-0.190408	0.718879	0.928621	0.181804	0.226851	0.669998
NM_001008218	AMY1B	-0.108403	0.116517	0.350599	0.906843	0.0725698	0.257743	0.897173	0.016098	0.078063	0.333677	0.154704	0.39347	0.865393	0.0401517	0.169147	0.0203081	0.442828	0.818104	-0.204985	0.663549	0.928908	-0.141537	0.662496	0.908591	-0.107397	0.523369	0.863855
NM_001008219	AMY1C	-0.189644	0.131744	0.350599	-0.335532	0.550577	0.752961	-2.36177	0.274635	0.476141	0.69227	0.0665057	0.239737	1.24646	0.0111103	0.0793387	-0.232806	0.767472	0.954932	0.134483	0.281391	0.75351	0.181667	0.231411	0.659845	-0.202116	0.622362	0.905914
NM_001008220	CPLX2	-0.508175	0.200705	0.366043	-0.110231	0.446907	0.676736	-3.56945	0.456073	0.650464	2.07866	0.000869696	0.0172069	2.01322	0.00043276	0.0108103	-0.700671	0.980357	0.999859	-0.095107	0.543278	0.885685	-0.351166	0.859832	0.973082	-0.885757	0.970449	0.999171
NM_001008221	AMY1A	-0.193042	0.132399	0.350599	0.0944333	0.351383	0.59434	0.687386	0.0210693	0.0932887	-0.82507	0.704445	0.882154	0.443729	0.12754	0.334969	-0.154387	0.679973	0.923968	-0.30194	0.753573	0.955782	0.0766785	0.364771	0.758687	-0.392519	0.787806	0.96108
NM_001008222	ZDHHC9	-0.883307	0.294905	0.429108	0.879903	0.0779177	0.267942	-5.79348	0.751049	0.871615	1.25776	0.0127284	0.0885529	0.122581	0.248134	0.487676	-0.102073	0.614038	0.89839	0.353388	0.103136	0.558257	0.12136	0.304836	0.71561	0.204285	0.207667	0.651149
NM_001008223	C1QL4	-0.0763216	0.110746	0.350599	-0.90866	0.763306	0.886513	1.08047	0.0126279	0.0663775	-0.336555	0.460009	0.716171	-0.140539	0.374804	0.608901	0.493163	0.0279813	0.33205	-0.286453	0.740287	0.953722	0.304151	0.114969	0.517699	-0.160157	0.579354	0.887519
NM_001008224	UACA	-0.227041	0.139119	0.350599	2.67011	6.52e-05	0.0050321	1.95656	0.00346782	0.0279985	-0.253014	0.415752	0.679528	1.22099	0.0122102	0.0833938	-0.32872	0.849766	0.977204	-0.171194	0.628139	0.916688	-0.628719	0.966158	0.997539	0.220469	0.194684	0.635108
NM_001008226	SAXO2	-0.763593	0.26386	0.406032	0.317314	0.252828	0.497536	-3.1145	0.38639	0.587198	-1.3972	0.886725	0.971266	1.14002	0.0163435	0.0989403	-0.264599	0.797745	0.963532	-0.0115889	0.445082	0.842938	-0.386719	0.881847	0.980313	-0.0225375	0.430727	0.815757
NM_001008237	TTC32	-0.20151	0.134047	0.350599	-0.524785	0.630977	0.807987	0.626975	0.0227233	0.0977878	-1.14856	0.823954	0.943173	0.240324	0.198626	0.429819	0.0454505	0.40749	0.79971	-0.125144	0.577544	0.900262	-0.0560163	0.551007	0.864374	-0.0988745	0.514274	0.858812
NM_001008269	TMEM89	-0.11849	0.118364	0.350599	-0.843026	0.743762	0.875942	-0.0988441	0.0509244	0.163637	1.08584	0.0219843	0.122043	-0.617929	0.611367	0.789483	0.0314184	0.427073	0.808298	0.0704494	0.350855	0.794737	-0.16556	0.690762	0.918834	-0.292539	0.707467	0.934186
NM_001008271		0.0223473	0.0941873	0.350599	-0.395569	0.576722	0.77101	-0.679699	0.0878544	0.231644	2.37541	0.000321183	0.00949947	-0.102968	0.355342	0.59219	-0.0582393	0.554302	0.871318	0.031378	0.395167	0.819961	0.00682303	0.462979	0.817397	0.109427	0.293569	0.724845
NM_001008273	TAGLN3	-0.968444	0.317379	0.44559	-0.878887	0.754643	0.88173	-2.33985	0.271555	0.472878	0.401324	0.133422	0.360484	-1.05636	0.774143	0.886471	-0.326276	0.848036	0.97707	0.0500196	0.374005	0.809582	0.0434917	0.411112	0.7881	0.0228759	0.382486	0.788993
NM_001008274	TRIM72	-2.05473	0.582325	0.639383	-0.274996	0.523492	0.733408	-9.06198	0.943046	0.982204	-0.519707	0.557504	0.787991	1.63778	0.00231579	0.030652	0.337356	0.0926917	0.496413	0.296978	0.13867	0.612623	0.131609	0.291593	0.705693	0.423839	0.0747111	0.453562
NM_001008388	CISD2	0.0435714	0.0908241	0.350599	0.278796	0.269251	0.515828	0.384386	0.0302772	0.117607	0.00885463	0.284939	0.556206	0.945838	0.0310975	0.144721	-0.350555	0.865053	0.981135	0.353116	0.103298	0.558257	0.236481	0.173121	0.601025	-0.0647562	0.476629	0.841559
NM_001008391	CCDC73	0.0916441	0.083543	0.350599	0.0969336	0.350278	0.59327	-0.677997	0.0877175	0.231366	-0.19352	0.384862	0.653039	1.14116	0.0162887	0.0988819	0.187853	0.224015	0.669739	-0.316387	0.765635	0.95957	0.401899	0.0576762	0.414908	0.155326	0.250212	0.687401
NM_001008393	C4orf46	0.0140876	0.0955009	0.350599	1.50059	0.0108978	0.0861321	1.20357	0.010659	0.059122	0.557107	0.0929323	0.291836	1.1974	0.0133332	0.0877886	-0.294603	0.823521	0.971585	-0.347702	0.790363	0.965537	0.0383007	0.418394	0.793034	0.660355	0.0176661	0.261628
NM_001008394	EID3	-1.69679	0.501848	0.579416	-1.00649	0.789695	0.90068	-5.27587	0.69365	0.832652	-1.36472	0.88004	0.968099	0.859909	0.0408715	0.170995	0.221273	0.187883	0.630121	-0.300108	0.751964	0.955664	0.0603912	0.387324	0.773823	0.0192419	0.386249	0.790712
NM_001008395	LAMTOR4	0.102561	0.0819355	0.350599	1.23747	0.0274904	0.148955	2.93859	0.000622838	0.00904897	1.21071	0.0147452	0.0959618	-0.647454	0.624538	0.79796	-0.105534	0.618689	0.901324	0.263902	0.162788	0.643338	0.298417	0.119297	0.525104	-0.0465406	0.456681	0.830743
NM_001008397	GPX8	-0.349745	0.164723	0.350976	1.03797	0.050667	0.210434	-2.9342	0.358819	0.561915	0.0481668	0.26654	0.535262	1.67422	0.00200547	0.0283646	-0.384662	0.886262	0.987499	-0.447028	0.856275	0.980617	-0.380613	0.878331	0.979388	-0.186676	0.606725	0.898144
NM_001008401	ZNF761	0.126867	0.0784779	0.350599	0.177487	0.31334	0.559678	1.68531	0.00525192	0.0370552	0.315965	0.160531	0.401838	-0.111986	0.360029	0.596527	0.0966579	0.336886	0.756662	-0.0225661	0.457925	0.849209	-0.360257	0.865866	0.975571	0.793633	0.00677257	0.172959
NM_001008405	BCAP29	-1.141	0.362701	0.478164	0.144983	0.327986	0.572446	-3.84337	0.497817	0.685421	-0.362131	0.47368	0.726722	-0.503484	0.558292	0.751757	0.0151848	0.450193	0.823426	0.116967	0.299886	0.766133	-0.0357231	0.523074	0.850627	-0.533513	0.872501	0.984406
NM_001008409	TTLL9	0.393729	0.0466356	0.350599	1.5508	0.00907306	0.0781346	-0.839219	0.100521	0.252968	0.0321534	0.273942	0.544315	1.00713	0.0255877	0.129078	0.390762	0.0634057	0.435146	0.412278	0.0736347	0.501628	0.302535	0.116111	0.519174	0.469338	0.0581971	0.415925
NM_001008486	SLC41A3	0.0839562	0.0846762	0.350599	1.83087	0.00294938	0.0407024	2.49862	0.00143048	0.0158211	0.20034	0.20241	0.458824	0.896959	0.036489	0.160163	0.114679	0.313124	0.737853	-0.0470045	0.486671	0.861267	0.112117	0.316814	0.725032	0.156034	0.249575	0.686626
NM_001008487	SLC41A3	-0.166333	0.127282	0.350599	-0.625248	0.669851	0.832016	1.81551	0.00430968	0.0323709	0.405741	0.132067	0.358188	-1.34005	0.844447	0.92717	-0.328403	0.849529	0.977196	0.00190164	0.429528	0.836747	-0.389658	0.883445	0.980752	0.0508257	0.352519	0.769048
NM_001008494		-1.68283	0.49856	0.577143	0.651634	0.133744	0.355528	-7.61862	0.889317	0.954636	0.21536	0.196678	0.451396	0.0202872	0.294583	0.535333	-0.0345382	0.520828	0.855787	-0.143557	0.598014	0.907676	-0.224694	0.755116	0.942265	-0.586496	0.89568	0.987807
NM_001008528	MXRA7	-1.0886	0.348946	0.467658	-0.609435	0.664019	0.828562	-2.6168	0.311371	0.515948	-1.0089	0.777579	0.922465	-0.11925	0.36379	0.59957	0.319498	0.10435	0.517341	-1.01603	0.989046	0.999863	-0.206118	0.735985	0.934906	-0.0391672	0.448593	0.826118
NM_001008536	TCHHL1	0.0870008	0.0842357	0.350599	0.902272	0.0735263	0.259724	-3.25961	0.408461	0.607373	0.632778	0.0773132	0.262129	2.07256	0.000335653	0.00945572	0.507544	0.0245871	0.317544	0.515437	0.0383228	0.40342	0.353495	0.0820863	0.463396	0.267675	0.159828	0.592642
NM_001008537	NEXMIF	-0.251017	0.143926	0.350599	0.856661	0.0826666	0.276449	5.44707	4.56e-06	0.000442243	0.0748375	0.254525	0.522086	1.58368	0.00288788	0.0350808	0.0327287	0.42521	0.806917	-0.427921	0.845155	0.97866	-0.086944	0.592874	0.881986	-0.52193	0.866741	0.983811
NM_001008539	SLC7A2	-1.02563	0.332411	0.455708	-1.14433	0.82255	0.91824	-2.32802	0.269824	0.471133	0.118671	0.235715	0.500389	-0.74882	0.667429	0.82536	0.47547	0.0325961	0.347659	-0.221626	0.680457	0.933655	0.637335	0.0067584	0.193292	0.55193	0.0357617	0.346261
NM_001008540	CXCR4	-1.58556	0.475298	0.560364	-0.00770025	0.3988	0.636513	-8.00596	0.907886	0.964356	-0.615705	0.606199	0.82185	2.28714	0.000128772	0.00544483	0.392529	0.0625787	0.433563	0.37585	0.0910478	0.538345	0.253751	0.156561	0.581799	0.00424114	0.401944	0.799996
NM_001008541	MXI1	-0.738137	0.257352	0.401632	0.499116	0.18329	0.420991	-2.91733	0.356243	0.559676	-0.881681	0.72825	0.8948	0.34735	0.158415	0.37677	0.041189	0.413624	0.802349	-0.124294	0.57658	0.9	0.020418	0.443644	0.806432	0.324483	0.123321	0.544943
NM_001008566	TPST2	-0.0246587	0.101818	0.350599	0.648714	0.134544	0.356496	3.38069	0.000248679	0.00487605	-0.0660887	0.320642	0.592057	1.09308	0.0192209	0.108299	0.00682263	0.462112	0.828067	-0.508488	0.888299	0.986437	0.204139	0.206429	0.63711	0.198892	0.212198	0.657347
NM_001008661	KYAT3	-2.72125	0.710977	0.743233	-0.242415	0.508793	0.723838	-9.03199	0.942322	0.981991	-0.822867	0.703473	0.88174	-0.787741	0.682496	0.834878	0.214394	0.194976	0.638378	0.257555	0.167726	0.647756	0.000736019	0.471737	0.823176	0.541426	0.0381062	0.356636
NM_001008693	CST9	-0.616788	0.227036	0.380197	-0.496069	0.619219	0.800165	-3.61334	0.46278	0.656206	-0.117383	0.345972	0.61698	1.75964	0.0013785	0.0224813	-0.0671269	0.566532	0.878069	-0.344971	0.788273	0.964881	0.158432	0.258214	0.679173	-0.599349	0.900762	0.989105
NM_001008695	THAP7	NA	NA	NA	1.40696	0.0155037	0.106185	NA	NA	NA	-0.168344	0.371984	0.642039	0.14736	0.237161	0.476004	0.33234	0.0957488	0.502798	0.179735	0.235955	0.715932	-0.136455	0.656347	0.906446	0.389048	0.0896111	0.482516
NM_001008708	CHAC2	0.492352	0.0377646	0.350599	1.29656	0.022588	0.133119	2.23267	0.00218336	0.0205397	0.713499	0.0628559	0.232012	0.726702	0.0610824	0.217067	0.273916	0.139276	0.574841	0.578979	0.0244566	0.346759	0.400057	0.058449	0.4159	0.716457	0.0117968	0.221324
NM_001008723	CFAP58	0.345803	0.051498	0.350599	1.86446	0.00254786	0.0374442	-0.257889	0.0597286	0.180986	-0.298145	0.439432	0.69988	0.293694	0.177963	0.40306	0.369048	0.0745039	0.457304	0.30276	0.134762	0.607734	0.256133	0.15444	0.579002	0.455273	0.0629444	0.426255
NM_001008727	ZNF121	0.282386	0.0585334	0.350599	0.355307	0.237045	0.482066	0.180558	0.0379201	0.136121	0.475401	0.113094	0.328285	0.118277	0.249905	0.489196	0.393809	0.0619243	0.431352	0.647043	0.0146049	0.289717	0.108608	0.321553	0.729683	0.315672	0.128795	0.553222
NM_001008737		-2.60564	0.690728	0.727079	-0.463064	0.605532	0.790521	-9.3646	0.950102	0.984644	-1.17871	0.832839	0.9466	0.583799	0.0901576	0.273402	-0.00121743	0.473326	0.834453	0.0727806	0.348147	0.793156	0.0228657	0.440306	0.804798	0.0934074	0.309368	0.738462
NM_001008739	C6orf226	0.104957	0.0816178	0.350599	0.95167	0.0642304	0.240349	1.12553	0.011875	0.0635379	0.102934	0.242301	0.508286	-0.107581	0.357715	0.594135	-0.0433432	0.53342	0.861835	0.24075	0.181485	0.662473	0.122489	0.303407	0.714991	0.0999323	0.302887	0.73388
NM_001008740	TMCO2	-1.68017	0.497941	0.576881	-1.32007	0.857085	0.935443	-4.25877	0.559218	0.735439	-0.85744	0.718387	0.889506	-0.284384	0.448514	0.67093	-0.136373	0.657867	0.9158	-0.534739	0.899795	0.988607	-0.418582	0.898811	0.983819	-0.232269	0.652345	0.916626
NM_001008743	SULT1C3	-0.173685	0.128679	0.350599	1.77695	0.00369776	0.0465506	2.06491	0.00289745	0.0250305	1.529	0.00532037	0.0517486	0.454547	0.124175	0.329777	0.0787288	0.361148	0.772939	-0.705352	0.952616	0.996533	0.0339933	0.42447	0.795837	-0.102109	0.517718	0.860997
NM_001008744	TDP1	0.269186	0.0600878	0.350599	0.610624	0.146281	0.37393	-0.615308	0.0829653	0.223064	1.07289	0.0228144	0.124563	0.283192	0.181905	0.407883	0.401958	0.0581868	0.422424	0.348777	0.105843	0.562656	0.236169	0.173394	0.601148	0.089841	0.312925	0.741165
NM_001008747	CTAGE15	NA	NA	NA	0.872858	0.079404	0.270315	NA	NA	NA	1.0343	0.0256341	0.13442	NA	NA	NA	0.478487	0.0317952	0.347336	0.226304	0.193732	0.677566	0.596909	0.0101025	0.222545	-0.0528478	0.463542	0.834781
NM_001008749	RAB19	-0.96364	0.316129	0.444661	0.769206	0.102419	0.310625	-5.45309	0.714539	0.846978	0.26802	0.177118	0.425205	0.561303	0.0955597	0.283956	0.344678	0.0883079	0.487173	-0.00709405	0.439873	0.840601	0.162982	0.25252	0.67508	-0.161044	0.580241	0.887571
NM_001008777	FBXO47	-0.921566	0.305032	0.43631	1.47527	0.012014	0.0911694	-5.00695	0.660325	0.808503	-0.944168	0.753332	0.909367	0.78958	0.0508292	0.194877	0.776398	0.00152151	0.108933	-0.228863	0.687442	0.935898	-0.0696763	0.569703	0.873953	0.994925	0.00139506	0.092711
NM_001008778	SPDYC	-0.365106	0.168078	0.351264	0.969388	0.0612474	0.235092	-4.90716	0.647658	0.799327	0.0448811	0.268067	0.537131	2.43247	5.91e-05	0.00322772	-0.78574	0.988249	0.999859	-0.160518	0.61675	0.913157	0.158177	0.258473	0.679173	-0.541507	0.876229	0.985217
NM_001008779	SPDYA	0.223005	0.0657237	0.350599	1.0508	0.0487309	0.205836	0.28714	0.0337816	0.126141	0.330974	0.15558	0.394789	0.355278	0.155722	0.37333	0.2184	0.190883	0.633262	0.389566	0.0841869	0.523548	0.242958	0.166676	0.592541	0.0410977	0.362862	0.776193
NM_001008781	FAT3	-0.21621	0.136996	0.350599	1.1077	0.0411567	0.187792	0.351729	0.0314476	0.120689	0.675312	0.0694338	0.246258	2.79029	1.06e-05	0.00111574	-0.0831546	0.588437	0.887913	-0.301048	0.75276	0.955712	-0.162113	0.686811	0.917205	-0.318526	0.730047	0.94292
NM_001008783	SLC35D3	-1.01852	0.330579	0.454432	0.481385	0.189571	0.428051	-3.45599	0.438711	0.635505	-0.818354	0.701423	0.880786	-0.281112	0.446764	0.669588	0.051134	0.399742	0.797151	0.169311	0.246174	0.725668	0.0897054	0.346918	0.749023	0.280861	0.150944	0.581446
NM_001008895	CUL4A	-0.0451117	0.105263	0.350599	2.06053	0.00108683	0.0224476	-1.36929	0.150674	0.327439	0.204391	0.200856	0.456926	-0.173078	0.391204	0.623717	0.317124	0.106014	0.520634	0.196723	0.220147	0.705462	-0.085174	0.590437	0.881365	-0.60912	0.90455	0.990238
NM_001008910	STK16	0.290294	0.0575875	0.350599	1.05532	0.0481423	0.204357	1.58851	0.00610975	0.0407772	4.66138	4.17e-06	0.000718232	1.21361	0.01255	0.0847109	0.224774	0.184432	0.628125	0.332152	0.115842	0.579574	0.220797	0.188723	0.619968	0.383454	0.0923651	0.488925
NM_001008938	CKAP5	-0.589714	0.220394	0.376462	0.354148	0.237495	0.482556	-1.28889	0.142064	0.315275	-0.464956	0.528865	0.768069	-0.959157	0.743783	0.870523	0.269313	0.143173	0.579752	0.13728	0.278571	0.751888	0.252533	0.157591	0.582738	0.319963	0.126122	0.548572
NM_001009	RPS5	0.13489	0.0773556	0.350599	0.900731	0.0738269	0.260152	-0.316727	0.063404	0.188802	1.2764	0.0120193	0.0853715	-0.05443	0.330863	0.56907	-0.0557164	0.550759	0.869905	0.142751	0.272953	0.747438	0.0889558	0.347938	0.749089	0.36357	0.102223	0.506842
NM_001009185	ACSL6	-1.02791	0.33299	0.456118	0.168433	0.317395	0.56319	-3.66045	0.470022	0.661595	-0.451468	0.521738	0.763526	-0.168139	0.388736	0.621496	-0.347018	0.862661	0.980442	-0.489134	0.878879	0.985082	-0.45097	0.913771	0.987618	-0.436337	0.817357	0.969639
NM_001009552	PPP2CB	0.310171	0.0553281	0.350599	1.50465	0.0107233	0.0853721	-0.965419	0.111258	0.2693	0.431988	0.124608	0.345997	1.53293	0.00352963	0.0394265	0.0455855	0.407337	0.799662	0.359824	0.0995305	0.552561	0.379145	0.0681862	0.43659	0.456128	0.0626533	0.425064
NM_001009554	MFAP3L	-0.139979	0.122328	0.350599	-0.0873375	0.436241	0.668777	-2.10857	0.240215	0.438374	0.865989	0.0416724	0.181294	0.77	0.0537488	0.20124	0.045092	0.408004	0.799925	-0.207076	0.665709	0.929696	0.116053	0.311585	0.720199	-0.0171226	0.424803	0.813005
NM_001009555	SH3D19	-1.44109	0.439645	0.533802	-1.14566	0.822846	0.918428	-1.67183	0.184908	0.372911	-1.5679	0.918088	0.982129	-1.37896	0.852167	0.929666	0.455518	0.0383991	0.366998	0.441559	0.0617256	0.471943	0.423014	0.0489728	0.390662	0.379781	0.0941014	0.491752
NM_001009562	SLCO1B3-SLCO1B7	-0.5209	0.203731	0.367816	2.76149	4.84e-05	0.00429352	3.20085	0.000378722	0.00656908	0.740388	0.0584844	0.221627	0.693217	0.0670651	0.228996	-0.382156	0.884775	0.986989	-0.422455	0.841861	0.977778	-0.687082	0.975355	0.998435	-0.591906	0.897769	0.988351
NM_001009565	CDKL4	0.181229	0.071117	0.350599	0.776509	0.10063	0.307888	2.06589	0.00288376	0.0249317	1.16504	0.0170227	0.104868	0.57134	0.0930666	0.279466	0.369658	0.0741967	0.456869	0.0772583	0.343265	0.791461	0.307339	0.112494	0.513469	-0.0293382	0.438003	0.819593
NM_001009568	SMPDL3B	-0.880588	0.294229	0.428697	-1.6701	0.907007	0.959446	0.744043	0.0195635	0.0887527	-0.934121	0.749263	0.906969	-1.66217	0.897563	0.952978	-0.287062	0.817266	0.970404	-0.281253	0.735824	0.952725	-0.297023	0.820418	0.961865	-0.184031	0.603883	0.896229
NM_001009606	HS3ST6	-0.524834	0.204669	0.3681	-0.582173	0.653622	0.822971	-0.00580824	0.0463227	0.154603	-0.974833	0.764898	0.915411	-0.536521	0.573985	0.762591	0.291322	0.125244	0.551998	0.049797	0.374268	0.809656	-0.249873	0.779554	0.949385	-0.0704541	0.482848	0.844115
NM_001009608	SLX4IP	-0.147534	0.123719	0.350599	1.51269	0.0104269	0.0838508	-3.09773	0.383627	0.584729	1.25208	0.0129558	0.089561	0.691012	0.0674514	0.229628	-0.407075	0.898699	0.990499	0.0662385	0.355722	0.798827	0.0488191	0.403585	0.783908	-0.29812	0.712202	0.935966
NM_001009609	SPANXN3	-0.554842	0.211896	0.371326	-0.458719	0.603739	0.789394	-1.9659	0.221242	0.417044	0.969985	0.0310317	0.150768	-0.764737	0.673697	0.829786	-0.163157	0.69013	0.928246	-0.230193	0.688737	0.936481	-0.0589193	0.554889	0.866279	-0.280636	0.697133	0.931512
NM_001009611	PRAMEF4	NA	NA	NA	-1.84629	0.92462	0.967114	NA	NA	NA	NA	NA	NA	-0.856504	0.708115	0.849399	-0.906364	0.994416	0.999859	-1.88057	0.999791	0.999966	-1.71415	0.999886	0.999918	-1.60789	0.998892	0.999881
NM_001009612	C20orf202	NA	NA	NA	0.288635	0.265082	0.511192	NA	NA	NA	0.885015	0.0396077	0.175769	1.94214	0.000605864	0.0136744	0.0362239	0.420322	0.80466	-0.219646	0.678522	0.932648	0.252909	0.157242	0.582352	0.143865	0.260589	0.69626
NM_001009613	SPANXN4	0.0132319	0.0956294	0.350599	0.965204	0.0619453	0.236546	-1.87081	0.209303	0.40247	1.28107	0.0118483	0.0850057	1.29714	0.00919984	0.0711776	-0.0490062	0.541357	0.86489	0.0722237	0.348833	0.793573	0.133093	0.289842	0.704633	-0.103383	0.519047	0.861464
NM_001009614	SPANXN1	-0.510809	0.201303	0.366208	-1.34396	0.861428	0.937773	-4.0434	0.527795	0.710955	3.06494	5.01e-05	0.00316257	0.305459	0.173364	0.397156	-0.258237	0.791908	0.962131	-0.945068	0.984646	0.999863	-0.331949	0.846749	0.969648	-0.507982	0.859454	0.982614
NM_001009615	SPANXN2	NA	NA	NA	0.475287	0.191836	0.430511	NA	NA	NA	-0.712967	0.653373	0.852326	-0.717006	0.654092	0.816819	-0.130166	0.650201	0.913832	-0.235818	0.694158	0.938581	0.00296427	0.468562	0.82096	0.0698664	0.3331	0.754445
NM_001009616	SPANXN5	-5.42919	0.962036	0.965065	-8.09203	0.998995	0.99989	-4.98175	0.657104	0.806077	-3.24366	0.99726	0.999702	-5.3993	0.997714	0.999438	-0.641128	0.972304	0.999859	-0.560531	0.909908	0.990274	-0.654427	0.970612	0.998135	-0.981231	0.980885	0.999781
NM_001009812	LBX2	-0.303436	0.154716	0.350599	0.410706	0.215758	0.459076	-3.56079	0.454779	0.649626	1.9111	0.00152875	0.0242466	0.147538	0.237072	0.476004	-0.218024	0.752435	0.950558	-0.072779	0.517165	0.87543	-0.181369	0.708923	0.92547	-0.741573	0.944595	0.997236
NM_001009877	BRD9	NA	NA	NA	0.759151	0.104939	0.314369	NA	NA	NA	1.2198	0.0143323	0.0946234	1.36683	0.00691571	0.0596205	0.405409	0.0566251	0.417733	-0.391586	0.82169	0.9725	0.609007	0.00896235	0.212845	0.177441	0.230665	0.672688
NM_001009880	KIAA0930	NA	NA	NA	-2.05487	0.940834	0.975216	NA	NA	NA	3.86538	6.26e-06	0.000718232	-3.36664	0.983329	0.992547	0.402393	0.0580201	0.422248	0.399752	0.0793153	0.514844	0.316876	0.105649	0.501818	0.12303	0.280447	0.71448
NM_001009894	C12orf29	NA	NA	NA	NA	NA	NA	NA	NA	NA	NA	NA	NA	NA	NA	NA	-0.637657	0.971708	0.999859	-0.652546	0.939796	0.995434	-0.2895	0.814249	0.959322	-0.771054	0.951147	0.997488
NM_001009899	USF3	0.0377919	0.0917379	0.350599	1.5615	0.00874091	0.0763854	-0.637814	0.0846741	0.225927	0.555223	0.0933891	0.29255	1.16188	0.0151656	0.0951732	0.203292	0.206813	0.650014	-0.176161	0.633505	0.918473	0.2885	0.126946	0.537112	-0.164463	0.583838	0.889517
NM_001009905	B3GNTL1	-0.208441	0.13543	0.350599	-1.09977	0.812552	0.912727	0.430786	0.0287076	0.113811	-0.819681	0.701963	0.881078	0.654906	0.0744157	0.243515	0.596826	0.0107409	0.238112	0.113036	0.304202	0.769177	0.143369	0.276787	0.696274	-0.737861	0.943728	0.997236
NM_001009931	HRNR	0.0716168	0.0865316	0.350599	-0.603973	0.661926	0.827298	0.659928	0.0218381	0.0955602	7.18219	2.09e-06	0.000718232	-0.694543	0.644753	0.811392	0.192979	0.21816	0.66323	0.319278	0.123808	0.59233	-0.308075	0.829121	0.965156	0.0822856	0.320545	0.745777
NM_001009933	DNASE1L1	-0.246946	0.143136	0.350599	-0.968851	0.780041	0.896047	4.31162	2.97e-05	0.00120479	-1.26248	0.855624	0.957493	-0.565137	0.587373	0.771997	-0.163496	0.690563	0.92846	-0.159215	0.615299	0.913065	-0.216228	0.746635	0.938984	-0.448844	0.825397	0.972514
NM_001009939	SEPTIN5	0.112475	0.0805109	0.350599	0.386994	0.224703	0.468096	0.1174	0.0406556	0.142771	-0.919333	0.743443	0.903558	1.81027	0.0011104	0.0197744	-0.0832134	0.588498	0.887913	0.128797	0.287337	0.758292	0.135949	0.286259	0.702906	0.26837	0.159356	0.591848
NM_001009959	ERMN	-0.0337336	0.103316	0.350599	0.442996	0.203707	0.444913	-0.425575	0.0701549	0.200794	-0.179229	0.377508	0.646777	0.0268733	0.291505	0.532443	0.0179074	0.446323	0.821294	0.103987	0.313813	0.775163	0.0561166	0.393226	0.777116	0.120837	0.282567	0.715541
NM_001009984	C20orf194	-3.34523	0.805702	0.823841	0.82152	0.0902807	0.28995	-14.6185	0.995932	0.999924	0.817373	0.0476581	0.197338	-0.401346	0.507876	0.71535	0.0950241	0.339012	0.758261	0.122054	0.294461	0.761799	0.181494	0.231572	0.659845	0.363931	0.102054	0.506383
NM_001009992	ZNF648	0.403394	0.0456818	0.350599	3.4668	2.1e-06	0.000397831	2.95047	0.00060915	0.00889689	0.470307	0.114379	0.33017	2.01811	0.000430649	0.0108103	0.166299	0.248787	0.691592	0.78355	0.00469902	0.186594	0.427865	0.047094	0.382884	0.235864	0.182873	0.622609
NM_001009993	FAM168B	-0.590627	0.220625	0.37664	0.602231	0.148793	0.377581	-4.35133	0.572468	0.745369	0.0385326	0.271041	0.540589	1.34806	0.00749202	0.0628719	-0.352992	0.866651	0.981866	-0.0227102	0.458107	0.849209	-0.213007	0.743323	0.938016	-0.064319	0.47618	0.841013
NM_001009994	RIPPLY2	-0.154028	0.12492	0.350599	0.387118	0.224642	0.468096	0.190519	0.0375574	0.135324	-1.10904	0.811672	0.938024	-0.0847049	0.346121	0.583511	0.107751	0.322103	0.745477	0.563652	0.0271784	0.359025	0.503509	0.0246791	0.302277	0.0279472	0.377098	0.785878
NM_001009997	C10orf62	-0.137207	0.121814	0.350599	-1.04877	0.800367	0.906489	1.89342	0.0037895	0.0296531	1.47475	0.0063152	0.057607	-2.86822	0.973004	0.98761	0.316004	0.106801	0.522032	0.0494476	0.374639	0.809669	-0.0553335	0.550018	0.863726	0.473662	0.0568503	0.412847
NM_001010	RPS6	-0.31511	0.157255	0.350599	-0.716677	0.702662	0.85261	0.328821	0.0322439	0.122406	-0.631533	0.613941	0.827248	-0.24105	0.426289	0.652534	-0.303476	0.830661	0.973495	-0.181748	0.639334	0.920679	-0.48462	0.927398	0.991522	0.0562763	0.346933	0.764144
NM_001010000	ARHGAP28	-1.52619	0.460767	0.549749	-0.309854	0.539002	0.745149	-5.92517	0.764179	0.879651	-0.249073	0.413762	0.677661	0.379347	0.147594	0.362443	0.562021	0.0151027	0.270532	0.560772	0.0277646	0.361612	0.41452	0.052355	0.400168	0.620916	0.0228429	0.287963
NM_001010844	IRAK1BP1	-1.2361	0.387307	0.495482	-0.915836	0.765227	0.887753	-3.36672	0.42517	0.622956	0.438153	0.123019	0.34336	-1.09998	0.786635	0.893353	0.278641	0.135332	0.568678	-0.0931555	0.541146	0.884881	0.0824843	0.35678	0.753749	0.313446	0.130096	0.55589
NM_001010846	SHE	NA	NA	NA	-0.565892	0.647153	0.818515	NA	NA	NA	-0.275636	0.427415	0.689871	1.25381	0.0108253	0.0783137	0.246273	0.163789	0.604744	0.0969265	0.321482	0.780108	-0.339163	0.851833	0.970875	-0.274657	0.691704	0.929572
NM_001010847	LRRC38	-0.81415	0.276906	0.415349	1.71553	0.00480771	0.054173	-2.61305	0.310815	0.515451	-0.635659	0.615966	0.828549	-1.72342	0.905101	0.956926	0.423146	0.0495535	0.398649	0.364161	0.0972021	0.547642	-0.207028	0.737061	0.935471	1.07662	0.000690505	0.0704583
NM_001010851	ZNF766	0.0475806	0.0902076	0.350599	-0.954571	0.776245	0.893506	-0.60958	0.0825135	0.222347	1.78392	0.00231085	0.0307423	-0.0294478	0.318327	0.55792	0.206363	0.203525	0.647542	0.741299	0.00660793	0.208144	0.26838	0.143733	0.56458	-0.151136	0.569964	0.884626
NM_001010852	CLVS2	0.143355	0.0762334	0.350599	0.492264	0.185697	0.423528	-2.91141	0.355342	0.558781	1.10475	0.0207642	0.118504	2.15936	0.000219546	0.00708186	0.167382	0.247492	0.691283	0.0180193	0.41091	0.82755	0.25471	0.155666	0.580817	0.13331	0.270505	0.705348
NM_001010853	PM20D2	-0.109993	0.116795	0.350599	0.790562	0.0972096	0.30138	1.16065	0.0112887	0.0614274	0.502324	0.10619	0.315645	0.557081	0.0966152	0.285619	-0.297266	0.825815	0.97196	0.289394	0.144048	0.621238	-0.202134	0.731627	0.933296	-0.229965	0.649946	0.916383
NM_001010854	TTC7B	-0.192055	0.132206	0.350599	-0.0221254	0.405464	0.642642	0.02161	0.0450383	0.151808	-0.363525	0.474422	0.72738	-0.404177	0.509293	0.716285	-0.130949	0.651209	0.914369	0.146342	0.269175	0.745228	0.309717	0.1108	0.510418	0.116992	0.28622	0.71836
NM_001010855	PIK3R6	-0.0521716	0.106448	0.350599	0.445499	0.202777	0.443639	-0.557779	0.0789932	0.216171	-0.276379	0.427803	0.690223	0.179974	0.22308	0.460426	0.689627	0.00410487	0.161238	0.485699	0.0467413	0.430134	0.299792	0.118149	0.522855	0.0503542	0.352977	0.769299
NM_001010857	LELP1	-0.704883	0.249051	0.395281	1.85618	0.00262984	0.0379961	-3.62872	0.465203	0.658261	-0.501358	0.548081	0.782694	-0.545632	0.578308	0.765338	0.0676462	0.376363	0.782088	0.152772	0.262613	0.74112	-0.0392685	0.528072	0.854081	-0.215775	0.636052	0.910594
NM_001010858	RNF187	-0.0210863	0.101211	0.350599	0.860168	0.0819813	0.275421	1.73261	0.00489829	0.0353849	-0.814451	0.699698	0.879687	0.992986	0.0267994	0.13261	-0.0487112	0.540921	0.864548	0.0823309	0.337657	0.788874	0.00875227	0.460215	0.815552	-0.126717	0.544275	0.872376
NM_001010859	C22orf42	0.464328	0.0401254	0.350599	0.566329	0.160425	0.392474	3.93551	8.44e-05	0.00245122	-0.505844	0.550403	0.783636	1.77154	0.00129828	0.0216324	0.192272	0.218907	0.663993	0.655772	0.0135952	0.281292	0.695077	0.00354881	0.148129	0.314191	0.129662	0.555378
NM_001010860	SAMD15	0.128322	0.0782734	0.350599	1.63158	0.00668917	0.0656352	0.295116	0.0334736	0.12533	-0.610515	0.603673	0.820707	-0.802893	0.688198	0.838204	0.437147	0.0444771	0.383716	0.665123	0.0125876	0.270105	0.453841	0.0378928	0.353383	0.294082	0.142106	0.57008
NM_001010862	SPIN3	0.198501	0.0688312	0.350599	1.82166	0.00304397	0.0414382	-2.10687	0.239962	0.438129	1.22823	0.0139339	0.0931122	0.958697	0.0298815	0.142051	0.137669	0.283549	0.716117	0.0511836	0.372734	0.809438	-0.0866178	0.592473	0.881873	0.691769	0.0141935	0.23984
NM_001010866	TMEM201	-1.04039	0.336265	0.458713	-0.033859	0.410981	0.646988	-3.25728	0.408139	0.607095	-0.829851	0.706585	0.883298	-0.0405679	0.323949	0.56323	-0.226632	0.761404	0.952608	-0.171309	0.628252	0.916783	-0.446032	0.911667	0.987179	-0.212601	0.632842	0.909024
NM_001010867	IBA57	-0.291177	0.152173	0.350599	0.676271	0.126745	0.347028	-0.858007	0.101999	0.255177	-0.615057	0.605894	0.821751	1.06882	0.0207809	0.11337	-0.28304	0.813846	0.968716	-0.0821666	0.528079	0.880487	-0.665468	0.972284	0.998192	-0.134031	0.552217	0.877105
NM_001010868	C6orf163	0.493474	0.0376777	0.350599	1.66761	0.00577052	0.0599658	0.572227	0.024334	0.101979	0.714848	0.0626348	0.231602	0.55249	0.0977108	0.287273	0.504965	0.0251511	0.319457	0.261226	0.164833	0.644686	0.455661	0.0373167	0.351186	0.752043	0.00916124	0.199023
NM_001010872	FAM83B	NA	NA	NA	-1.62824	0.902109	0.956862	NA	NA	NA	0.415983	0.129109	0.354168	-2.42834	0.957813	0.980672	0.145702	0.273527	0.708933	0.367839	0.0952731	0.545024	0.508122	0.0236674	0.297725	0.398193	0.0855062	0.474169
NM_001010873	TSPO2	0.482386	0.0386004	0.350599	1.4981	0.0109987	0.0864485	2.05774	0.00292255	0.0250903	0.395952	0.135162	0.363335	0.294647	0.177666	0.402728	0.51389	0.0232482	0.312413	0.740717	0.00663804	0.208144	0.361659	0.0774115	0.455211	0.313278	0.130212	0.55589
NM_001010874	TECRL	-0.718025	0.252272	0.398065	-0.00977956	0.399696	0.637129	-4.78138	0.631218	0.788461	2.3857	0.000306583	0.00914936	-0.466635	0.540327	0.740487	0.285787	0.129636	0.559811	0.449913	0.0587367	0.464921	0.0349908	0.423182	0.795372	0.0203235	0.385071	0.790191
NM_001010875	SLC25A30	-0.00104746	0.0978989	0.350599	1.34923	0.0188693	0.119161	0.0378445	0.0442968	0.150188	0.286661	0.170569	0.416332	-0.510561	0.56169	0.754201	-0.236501	0.771197	0.956035	-0.297746	0.749976	0.955134	-0.126036	0.643417	0.901445	0.656093	0.0181498	0.262085
NM_001010876	TMEM244	NA	NA	NA	0.436781	0.206	0.447678	NA	NA	NA	0.207596	0.199573	0.454945	0.547426	0.0990619	0.289785	0.584536	0.012154	0.248796	0.0593682	0.363394	0.802675	0.150848	0.26752	0.688729	-0.285869	0.701786	0.932142
NM_001010877	ZNF311	0.0758477	0.0859029	0.350599	1.48037	0.0117786	0.0899927	2.55959	0.00128674	0.0146645	2.12458	0.000750817	0.0158995	1.34708	0.00752157	0.0629594	0.432427	0.0461893	0.388313	-0.326809	0.77428	0.960822	0.0342012	0.424248	0.795817	0.163572	0.242817	0.681834
NM_001010879	ZIK1	-1.22539	0.384586	0.49356	-0.292442	0.531312	0.739111	-6.98023	0.851584	0.934932	-0.403258	0.495973	0.743757	2.77436	1.27e-05	0.00114015	0.455971	0.0382485	0.366497	0.273014	0.155901	0.637485	0.46814	0.0336314	0.338239	-0.330304	0.739736	0.946257
NM_001010880	ZNF780A	-0.600488	0.223059	0.378193	0.047897	0.372971	0.613723	-5.86646	0.75833	0.876354	0.164719	0.216619	0.477608	3.51423	2.11e-06	0.000579124	-0.777846	0.987687	0.999859	-0.456277	0.861468	0.9817	-0.654873	0.970674	0.998135	-0.512958	0.862041	0.982614
NM_001010881	C1orf167	-1.46973	0.446726	0.538964	-1.13505	0.820603	0.917131	-3.96798	0.516474	0.702169	-1.43008	0.893518	0.973403	0.65417	0.0745656	0.243694	-0.0175771	0.496805	0.846129	-0.0782996	0.523637	0.879011	-0.335366	0.849196	0.970346	-0.304285	0.717545	0.937647
NM_001010883	FAM102B	-0.801647	0.273679	0.413204	1.00559	0.0555819	0.222058	-2.77711	0.334898	0.539086	-0.50393	0.549393	0.783103	-0.931143	0.73434	0.864296	-0.0267332	0.5098	0.851399	0.085056	0.334624	0.786755	0.154337	0.263166	0.684839	0.321854	0.124987	0.547785
NM_001010886	CLPSL1	0.299414	0.0565701	0.350599	0.245489	0.283552	0.531635	-0.625069	0.0837113	0.224339	1.21642	0.0144678	0.0949292	1.47796	0.00446059	0.045725	0.528077	0.0204641	0.295497	0.15553	0.259919	0.738868	0.339871	0.0902398	0.475764	0.17418	0.233555	0.67525
NM_001010887	ACER2	-1.49248	0.452439	0.543293	-1.17721	0.829594	0.922268	-3.7442	0.482827	0.672901	-0.117751	0.346154	0.61698	-0.930769	0.734226	0.864255	0.209552	0.200103	0.644815	0.335734	0.113563	0.575126	0.000618672	0.471938	0.823349	0.0211087	0.384304	0.789781
NM_001010888	ZC3H12B	0.251369	0.0622034	0.350599	2.30586	0.000384701	0.0136018	-3.42392	0.433899	0.6311	0.228989	0.191414	0.444334	1.89455	0.000732525	0.015304	0.420715	0.0504969	0.400548	0.252433	0.171812	0.651991	0.292126	0.124104	0.532625	0.251529	0.17146	0.609787
NM_001010889	PRAMEF6	-0.207179	0.135195	0.350599	-0.658774	0.682268	0.839447	-1.09047	0.122818	0.287538	-0.454653	0.523492	0.764845	1.37518	0.00666239	0.0582207	0.257434	0.153622	0.593695	0.454118	0.057143	0.461106	0.220213	0.189362	0.620275	0.37586	0.0959361	0.495339
NM_001010893	SLC10A5	-1.24096	0.388586	0.496362	0.136027	0.332256	0.576949	-4.62505	0.610126	0.773083	0.877462	0.0404044	0.177779	-1.35227	0.846835	0.928023	-0.140956	0.663491	0.917593	-0.119097	0.570567	0.89811	0.24719	0.162683	0.588447	0.385318	0.0915421	0.487143
NM_001010895	ERCC6L2	-0.674914	0.241519	0.389856	1.41422	0.0150811	0.104343	-4.44661	0.585605	0.754853	-0.0444904	0.310271	0.582037	0.37722	0.148261	0.36334	0.350062	0.0852367	0.480914	-0.0651844	0.508175	0.870695	0.499956	0.025478	0.304977	-0.157522	0.576606	0.886928
NM_001010897	SERP2	-0.239267	0.141584	0.350599	2.47509	0.000161869	0.00814211	0.714916	0.0203346	0.0909625	2.1674	0.000642365	0.0145177	3.27383	4.22e-06	0.000579124	-0.193194	0.725269	0.941133	-0.134448	0.587938	0.903609	-0.633096	0.966933	0.997802	0.00367115	0.402607	0.800442
NM_001010898	SLC6A17	-0.371874	0.169542	0.351691	1.05616	0.0479762	0.203954	4.47667	2.05e-05	0.000924116	0.18219	0.20964	0.468139	0.848257	0.0424147	0.174953	-0.278972	0.810445	0.967731	-0.203517	0.662038	0.92881	-0.415093	0.897129	0.9837	-0.589913	0.89701	0.988217
NM_001010903	BNIP5	-1.35663	0.418161	0.518269	-0.828537	0.739353	0.873692	-5.6754	0.738775	0.863581	-0.0158726	0.296608	0.568456	1.09328	0.0192145	0.108299	-0.460015	0.923298	0.995131	-0.138793	0.592914	0.904962	0.0874157	0.349967	0.749455	-0.0877657	0.501963	0.853664
NM_001010904	GLYATL3	-0.263281	0.146425	0.350599	1.12819	0.0387245	0.181611	0.667116	0.0216419	0.0949837	1.7619	0.00248395	0.0318045	1.01904	0.02449	0.12555	-0.0348404	0.521256	0.855893	-0.506	0.887065	0.985726	-0.0970706	0.606381	0.887687	-0.415214	0.803487	0.96511
NM_001010905	C6orf58	-0.413507	0.178755	0.354715	-0.0632479	0.424824	0.658395	-0.418769	0.0696963	0.199941	-1.51267	0.908891	0.979428	0.340661	0.160784	0.380284	-0.163364	0.690391	0.928386	-0.268325	0.724285	0.948567	-0.206915	0.736926	0.935414	-0.237036	0.65704	0.918126
NM_001010906	NUGGC	-3.16394	0.780976	0.802703	-1.61724	0.900806	0.956089	-10.3752	0.966328	0.989664	-0.118686	0.346612	0.617348	-0.544634	0.577846	0.765149	0.140389	0.280028	0.713796	-0.400247	0.827503	0.974393	-0.0989736	0.608854	0.888956	-0.57156	0.889495	0.986474
NM_001010908	C1QL3	-0.0361339	0.103739	0.350599	1.38193	0.0169437	0.112732	5.35213	6.84e-06	0.000442243	0.651379	0.073847	0.255539	-0.609933	0.608008	0.787486	0.0190473	0.44459	0.8197	-0.311655	0.761759	0.958593	-0.131136	0.649651	0.90351	0.279208	0.152044	0.581905
NM_001010909	MUC21	0.213658	0.0668898	0.350599	0.801811	0.0946175	0.297066	1.54833	0.00642003	0.0420729	0.129897	0.23098	0.493946	0.500589	0.111162	0.3096	0.327035	0.0992876	0.509429	0.0487794	0.375402	0.81015	0.0845451	0.353873	0.751669	0.394274	0.0872024	0.476776
NM_001010911		0.288134	0.057853	0.350599	0.968035	0.0614618	0.235533	-0.957006	0.110482	0.26826	-0.10563	0.340091	0.611747	1.24714	0.0110808	0.0791768	0.727384	0.00262752	0.136109	0.631775	0.0164757	0.303556	0.308512	0.111639	0.511251	0.538291	0.0388208	0.357457
NM_001010912	C10orf120	-0.459136	0.189131	0.359931	-0.850918	0.746303	0.877525	1.19887	0.010732	0.0594077	-0.185875	0.380981	0.64975	-0.813654	0.692048	0.840451	-0.135175	0.656454	0.915385	-0.711981	0.953885	0.996533	-0.24021	0.770399	0.947644	-0.749177	0.946369	0.997236
NM_001010915	HACD4	-1.41883	0.434021	0.529888	-0.225775	0.501005	0.717702	-5.95186	0.766776	0.881457	0.547656	0.095118	0.295695	-0.0453594	0.326313	0.565599	0.422219	0.0499048	0.399322	0.063902	0.358336	0.799649	0.207077	0.203234	0.633686	0.759628	0.00866343	0.19354
NM_001010917	GOLGA7B	0.461085	0.0404084	0.350599	0.870049	0.0799989	0.27146	1.13687	0.0116788	0.0628538	1.30934	0.0108118	0.0800712	0.863535	0.0403818	0.169633	0.584981	0.0120918	0.24795	0.492445	0.044716	0.422365	0.251367	0.158591	0.584158	0.515548	0.0444974	0.375427
NM_001010919	CALHM6	-1.59956	0.478643	0.562658	-0.660192	0.682788	0.839745	-6.23113	0.793008	0.898569	-0.0864993	0.330739	0.603688	0.579568	0.0911265	0.275467	-0.00680268	0.481245	0.837788	-0.436393	0.850232	0.97989	-0.404286	0.891304	0.982172	-0.414296	0.802851	0.965059
NM_001010922	BCL2L15	-0.0154532	0.100285	0.350599	0.805603	0.0937094	0.295425	1.20532	0.0106293	0.0590124	0.318606	0.15963	0.400552	1.70007	0.00181548	0.0270083	-0.0880886	0.595154	0.890741	0.298779	0.13748	0.611599	-0.0474123	0.539217	0.85753	-0.225091	0.645056	0.913778
NM_001010923	THEMIS	0.0610166	0.0881246	0.350599	0.11368	0.342388	0.586342	-0.435184	0.0708233	0.202177	0.0252336	0.277114	0.547429	0.855478	0.0414288	0.172383	0.269556	0.142954	0.579406	-0.0158697	0.44993	0.845003	0.0326427	0.426385	0.796336	-0.0422622	0.451994	0.827562
NM_001010924	FAM171A1	-0.951804	0.313028	0.44254	2.39901	0.000241752	0.0101668	-4.20897	0.552017	0.729551	-2.46646	0.986617	0.999461	0.469196	0.119963	0.323376	-0.220322	0.754828	0.950691	0.138082	0.277738	0.751349	-0.176683	0.703592	0.923579	-0.377048	0.776371	0.958577
NM_001010926	HES5	-2.38379	0.64937	0.693743	-0.557024	0.643723	0.816588	-5.58975	0.729704	0.857142	-1.07411	0.800224	0.932208	-2.31425	0.952409	0.978175	-0.231076	0.765719	0.954083	-0.217708	0.676534	0.932518	-0.445211	0.911292	0.987108	-0.153869	0.572794	0.885117
NM_001010927	TIAM2	-2.32193	0.637293	0.683465	-0.373432	0.567255	0.764955	-6.56133	0.821111	0.916599	-1.50913	0.908284	0.979428	-0.843823	0.703553	0.846925	-0.478681	0.930685	0.995721	-0.350913	0.792741	0.965591	-0.323096	0.840414	0.967019	-0.708068	0.936285	0.996393
NM_001010938	TNK2	-1.04868	0.338438	0.46051	-0.51249	0.626005	0.804785	-3.42514	0.434086	0.631223	-0.35654	0.470645	0.724643	0.0994444	0.258045	0.497856	-0.30849	0.834571	0.974007	0.119236	0.297494	0.764187	-0.21687	0.747292	0.93956	-0.267738	0.685306	0.927789
NM_001010939	LIPJ	-0.181527	0.130174	0.350599	0.146932	0.327101	0.57161	-2.79893	0.338238	0.542408	0.2115	0.198093	0.452995	1.71439	0.00168882	0.02579	0.115319	0.312269	0.737319	0.283107	0.148622	0.628384	0.195451	0.215803	0.644016	0.268156	0.159475	0.59201
NM_001010940	C9orf135	-0.864542	0.290022	0.42533	0.582858	0.154992	0.385569	-4.39625	0.578644	0.749803	-0.706501	0.65052	0.850582	1.06173	0.0212538	0.114943	-0.0414109	0.53061	0.860414	0.659821	0.0131637	0.277115	0.551185	0.0158853	0.256381	0.327383	0.121563	0.541917
NM_001010969	CYP4A22	-4.12473	0.889594	0.89929	-3.32241	0.983077	0.993795	-11.0474	0.973905	0.99188	-1.68021	0.934201	0.985966	-0.448922	0.531564	0.733978	-0.159941	0.686436	0.926693	-0.289716	0.743256	0.953988	0.128873	0.295158	0.70859	0.00309836	0.403173	0.800453
NM_001010971	SAMD13	-0.282062	0.15029	0.350599	0.0537998	0.370276	0.611511	5.54505	4.56e-06	0.000442243	1.10851	0.0205098	0.117602	1.24465	0.0111758	0.0797072	-0.091779	0.600021	0.893101	-0.187714	0.645462	0.922523	-0.272051	0.79952	0.95536	-0.576704	0.891575	0.986906
NM_001010977	METTL21C	-1.68191	0.498355	0.577056	0.105211	0.346317	0.59005	-6.53069	0.818569	0.915932	0.731686	0.059886	0.225391	-1.03386	0.767262	0.882847	-0.299631	0.827722	0.972652	-0.651922	0.939623	0.995434	-0.254326	0.783743	0.950683	-0.76081	0.948891	0.997236
NM_001010979	C1orf189	0.0338288	0.0923644	0.350599	1.034	0.0512094	0.211743	-0.0671103	0.0494141	0.160802	-1.06305	0.796585	0.930352	0.601891	0.0859376	0.265498	0.101746	0.329973	0.751292	-0.00195583	0.433861	0.838409	-0.117997	0.633383	0.897798	0.153522	0.251846	0.689065
NM_001010980	NCMAP	-0.262585	0.146296	0.350599	0.883922	0.0770958	0.266118	1.56517	0.0062877	0.0415011	1.73904	0.00268	0.0333927	-0.324661	0.469063	0.686945	-0.230224	0.764856	0.953746	-0.230345	0.688867	0.936481	-0.206693	0.736655	0.935207	-0.383076	0.780953	0.959071
NM_001010987	IFIT1B	NA	NA	NA	2.23181	0.000521344	0.0151445	NA	NA	NA	0.832545	0.0457226	0.192592	0.802706	0.0488448	0.190809	-0.132858	0.653597	0.915024	0.218331	0.200679	0.684264	-0.156642	0.680428	0.914679	-0.225611	0.645558	0.914053
[truncated: 22,247 more rows]

## Sheet: TableS3B
Supplemental Table S3B. Knockout (Gecko) Screen results. L2FC Sum for individual drug-cell line combinations
[truncated: 20,670 more rows]

[truncated: 3 more sheets: Table S4A, Table S4B, TableS5]
